# Supplementary material for: Differences and similarities between human and chimpanzee neural progenitors during cerebral cortex development
Source: eLife. 2016 Sep 26;5:e18683. doi: 10.7554/eLife.18683 (PMC5110243; doi:10.7554/eLife.18683)
Supplement: Figure 3—source data 2. — Excel file (*.xlsx) with multiple sheets containing results of all differential expression analyses presented in the manuscript as well as GO enrichment analysis for the differentially expressed (DE) genes: Sheet 1: Genes specific to APs, not DE between chimpanzee and human; Sheet 2: GO enrichment analysis for genes of sheet 1; Sheet 3: Genes specific to Neurons, not DE between chimpanzee and human; Sheet 4: GO enrichment analysis for genes of sheet 3; Sheet 5: Genes specific to APs and upregulated to human compared to chimpanzee; Sheet 6: GO enrichment analysis for genes of sheet 6; Sheet 7: Genes specific to Neurons and upregulated to human compared to chimpanzee; Sheet 8: GO enrichment analysis for genes of sheet 7; Sheet 9: Genes specific to APs and upregulated to chimpanzee compared to human; Sheet 10: GO enrichment analysis for genes of sheet 6; Sheet 11: Genes specific to Neurons and upregulated to chimpanzee compared to human; Sheet 12: GO enrichment analysis for genes of sheet 11; Sheet 13: GO enrichment data used to generate Figure 3F. DOI: http://dx.doi.org/10.7554/eLife.18683.012 [file elife-18683-fig3-data2.xlsx]

## Sheet: NotDE_AP_specific.csv
Note: Genes higher expressed in human APs compared to human Neurons and not differentially expressed between human and chimpazee APs
gene_id	ensembl_id	notation	annotation	Z.x	Z.y
ABCA12	ENSG00000144452.14	protein_coding	KNOWN	3.53127	2.29774
ABCB10	ENSG00000135776.4	protein_coding	KNOWN	2.57431	1.10222
ABCC4	ENSG00000125257.13	protein_coding	KNOWN	3.65801	-0.661722
ABCF3	ENSG00000161204.11	protein_coding	KNOWN	2.69187	-0.0199749
ABHD3	ENSG00000158201.9	protein_coding	KNOWN	3.18953	-0.192349
ABHD4	ENSG00000100439.10	protein_coding	KNOWN	5.59458	-0.666426
ABTB2	ENSG00000166016.5	protein_coding	KNOWN	1.98542	0.0161607
AC004381.6	ENSG00000005189.19	protein_coding	KNOWN	2.91545	-0.242804
AC013461.1	ENSG00000091436.16	protein_coding	KNOWN	4.72079	1.55919
ACACB	ENSG00000076555.15	protein_coding	KNOWN	3.82897	2.52306
ACAD9	ENSG00000177646.17	protein_coding	KNOWN	2.04835	-0.782681
ACKR3	ENSG00000144476.5	protein_coding	KNOWN	2.85309	-1.32945
ACOT9	ENSG00000123130.16	protein_coding	KNOWN	3.4655	0
ACRV1	ENSG00000134940.13	protein_coding	KNOWN	3.66646	-0.906515
ACSF3	ENSG00000176715.15	protein_coding	KNOWN	2.69486	1.97278
ACTL6A	ENSG00000136518.16	protein_coding	KNOWN	2.95056	1.36664
ACTN1	ENSG00000072110.13	protein_coding	KNOWN	2.15348	-0.0206414
ACTR3B	ENSG00000133627.17	protein_coding	KNOWN	3.68349	2.1226
ADAMTS6	ENSG00000049192.14	protein_coding	KNOWN	4.14908	-0.775486
ADAMTS9	ENSG00000163638.13	protein_coding	KNOWN	5.50012	1.40821
ADAT2	ENSG00000189007.15	protein_coding	KNOWN	2.16968	-0.781762
ADCK3	ENSG00000163050.16	protein_coding	KNOWN	5.39126	2.5926
ADCK4	ENSG00000123815.11	protein_coding	KNOWN	2.34393	0.483552
ADGRL2	ENSG00000117114.19	protein_coding	KNOWN	2.22454	-0.807875
ADGRV1	ENSG00000164199.15	protein_coding	KNOWN	4.53462	-1.04987
ADH5	ENSG00000197894.10	protein_coding	KNOWN	2.27756	-0.956363
ADK	ENSG00000156110.13	protein_coding	KNOWN	2.53517	-1.288
ADO	ENSG00000181915.4	protein_coding	KNOWN	1.99685	-0.603921
AEN	ENSG00000181026.14	protein_coding	KNOWN	2.47921	2.11626
AFF1	ENSG00000172493.20	protein_coding	KNOWN	2.28844	0.42459
AGA	ENSG00000038002.8	protein_coding	KNOWN	2.54234	0.304381
AHI1	ENSG00000135541.20	protein_coding	KNOWN	2.72218	-0.722938
AIF1L	ENSG00000126878.12	protein_coding	KNOWN	4.70736	-0.420986
AJUBA	ENSG00000129474.15	protein_coding	KNOWN	3.29169	-0.458859
AK4	ENSG00000162433.14	protein_coding	KNOWN	2.64826	1.78785
ALDH6A1	ENSG00000119711.12	protein_coding	KNOWN	3.66186	0.517261
ALG8	ENSG00000159063.12	protein_coding	KNOWN	2.23409	0.298026
ALYREF	ENSG00000183684.7	protein_coding	KNOWN	2.0503	1.94197
AMBN	ENSG00000178522.14	protein_coding	KNOWN	6.3162	-1.26326
ANGPTL1	ENSG00000116194.12	protein_coding	KNOWN	3.70123	0.767887
ANKRD18B	ENSG00000230453.9	protein_coding	KNOWN	1.9945	2.41893
ANKRD6	ENSG00000135299.16	protein_coding	KNOWN	1.97712	0
ANLN	ENSG00000011426.10	protein_coding	KNOWN	7.15533	0.916235
ANO5	ENSG00000171714.10	protein_coding	KNOWN	3.10298	2.24409
ANO6	ENSG00000177119.15	protein_coding	KNOWN	2.90324	-0.375594
ANP32E	ENSG00000143401.14	protein_coding	KNOWN	7.16081	-1.7659
ANXA2	ENSG00000182718.16	protein_coding	KNOWN	2.12591	1.63566
ANXA5	ENSG00000164111.14	protein_coding	KNOWN	6.31028	0.23112
APEH	ENSG00000164062.12	protein_coding	KNOWN	2.01282	0.954788
APOA1BP	ENSG00000163382.11	protein_coding	KNOWN	2.99532	0.893665
APOBEC2	ENSG00000124701.5	protein_coding	KNOWN	2.19364	2.5536
APOBEC3C	ENSG00000244509.3	protein_coding	KNOWN	2.09127	-1.27632
APOM	ENSG00000204444.10	protein_coding	KNOWN	2.01654	-0.571411
AR	ENSG00000169083.15	protein_coding	KNOWN	3.94411	0.962596
ARHGAP11A	ENSG00000198826.10	protein_coding	KNOWN	6.45174	0.00805042
ARHGAP33	ENSG00000004777.18	protein_coding	KNOWN	3.72841	1.75219
ARHGEF39	ENSG00000137135.17	protein_coding	KNOWN	4.37285	0.425773
ARHGEF6	ENSG00000129675.15	protein_coding	KNOWN	4.81802	0.534808
ARL6IP1	ENSG00000170540.14	protein_coding	KNOWN	2.33578	-0.960891
ARL6IP6	ENSG00000177917.10	protein_coding	KNOWN	3.28836	1.02481
ASF1B	ENSG00000105011.8	protein_coding	KNOWN	2.60451	0
ASPH	ENSG00000198363.15	protein_coding	KNOWN	2.60911	-0.260219
ASPM	ENSG00000066279.16	protein_coding	KNOWN	6.90745	0.296663
ASPN	ENSG00000106819.11	protein_coding	KNOWN	2.60886	1.30989
ASPSCR1	ENSG00000169696.15	protein_coding	KNOWN	2.58806	0.669263
ASXL2	ENSG00000143970.16	protein_coding	KNOWN	1.98086	0
ATAD2	ENSG00000156802.12	protein_coding	KNOWN	5.94972	0.191154
ATAD5	ENSG00000176208.8	protein_coding	KNOWN	3.02865	0
ATG16L2	ENSG00000168010.10	protein_coding	KNOWN	2.31123	0.52264
ATG4C	ENSG00000125703.14	protein_coding	KNOWN	2.56615	-1.71628
ATP7A	ENSG00000165240.17	protein_coding	KNOWN	2.25478	0.295887
ATP9B	ENSG00000166377.19	protein_coding	KNOWN	2.75753	-0.400276
AURKA	ENSG00000087586.17	protein_coding	KNOWN	4.93701	0.24011
AURKB	ENSG00000178999.12	protein_coding	KNOWN	6.62874	-0.021229
B2M	ENSG00000166710.17	protein_coding	KNOWN	4.25827	-2.06133
B3GNT5	ENSG00000176597.11	protein_coding	KNOWN	2.67711	0.809342
B4GALT1	ENSG00000086062.12	protein_coding	KNOWN	2.10921	2.34077
BARD1	ENSG00000138376.10	protein_coding	KNOWN	7.08073	1.4645
BAZ2B	ENSG00000123636.17	protein_coding	KNOWN	1.97768	-0.532225
BCAN	ENSG00000132692.18	protein_coding	KNOWN	4.23437	-0.50743
BCAR3	ENSG00000137936.16	protein_coding	KNOWN	1.9835	-0.38381
BCKDHB	ENSG00000083123.14	protein_coding	KNOWN	2.6018	-1.04705
BCKDK	ENSG00000103507.13	protein_coding	KNOWN	2.38872	1.89278
BCL2L12	ENSG00000126453.9	protein_coding	KNOWN	2.90718	0.330494
BDH2	ENSG00000164039.14	protein_coding	KNOWN	3.91738	0.2081
BEND3	ENSG00000178409.13	protein_coding	KNOWN	2.37231	-1.60834
BEND7	ENSG00000165626.16	protein_coding	KNOWN	2.09776	-0.327049
BIRC5	ENSG00000089685.14	protein_coding	KNOWN	7.15939	-0.236209
BLM	ENSG00000197299.10	protein_coding	KNOWN	6.26013	1.70038
BMP7	ENSG00000101144.12	protein_coding	KNOWN	3.60465	-0.420269
BMPR1A	ENSG00000107779.11	protein_coding	KNOWN	2.14823	1.54195
BMPR1B	ENSG00000138696.10	protein_coding	KNOWN	5.42593	0.607856
BNIP1	ENSG00000113734.17	protein_coding	KNOWN	2.51545	-0.40837
BOC	ENSG00000144857.14	protein_coding	KNOWN	3.60376	0
BORA	ENSG00000136122.15	protein_coding	KNOWN	4.53537	-0.167314
BRCA1	ENSG00000012048.20	protein_coding	KNOWN	4.64371	-0.480591
BRCA2	ENSG00000139618.14	protein_coding	KNOWN	5.15505	0.231156
BRD8	ENSG00000112983.17	protein_coding	KNOWN	3.85073	1.94224
BRIP1	ENSG00000136492.8	protein_coding	KNOWN	4.35293	-0.00865765
BRIX1	ENSG00000113460.12	protein_coding	KNOWN	2.01003	-0.0191636
BTG3	ENSG00000154640.14	protein_coding	KNOWN	3.5425	1.55678
BUB1	ENSG00000169679.14	protein_coding	KNOWN	7.16008	-0.515739
BUB1B	ENSG00000156970.12	protein_coding	KNOWN	6.14046	-1.74658
BYSL	ENSG00000112578.9	protein_coding	KNOWN	3.04459	1.6841
C15orf41	ENSG00000186073.11	protein_coding	KNOWN	2.23084	0.481822
C17orf53	ENSG00000125319.14	protein_coding	KNOWN	2.58767	1.49704
C19orf48	ENSG00000167747.13	protein_coding	KNOWN	3.94347	1.5534
C1orf35	ENSG00000143793.12	protein_coding	KNOWN	1.99307	0.408982
C1orf54	ENSG00000118292.8	protein_coding	KNOWN	3.52273	2.19889
C1orf61	ENSG00000125462.16	protein_coding	KNOWN	4.25913	0.193846
C1QTNF6	ENSG00000133466.13	protein_coding	KNOWN	2.5719	2.93006
C21orf58	ENSG00000160298.17	protein_coding	KNOWN	5.93464	0.622072
C2orf68	ENSG00000168887.10	protein_coding	KNOWN	2.50436	1.67799
C3orf58	ENSG00000181744.8	protein_coding	KNOWN	3.01004	2.49719
C4orf46	ENSG00000205208.4	protein_coding	KNOWN	3.43029	-1.34443
C4orf47	ENSG00000205129.8	protein_coding	KNOWN	2.03785	1.07746
C5orf30	ENSG00000181751.9	protein_coding	KNOWN	3.05406	0.614574
C5orf34	ENSG00000172244.8	protein_coding	KNOWN	2.1295	-0.863724
C5orf51	ENSG00000205765.8	protein_coding	KNOWN	2.06327	1.0504
C6orf136	ENSG00000204564.11	protein_coding	KNOWN	3.18306	0.252113
C7orf49	ENSG00000122783.16	protein_coding	KNOWN	4.52562	0.156868
C8orf37	ENSG00000156172.5	protein_coding	KNOWN	4.345	-1.91535
C8orf4	ENSG00000176907.4	protein_coding	KNOWN	5.11993	-0.725638
C9orf114	ENSG00000198917.11	protein_coding	KNOWN	4.03643	1.58602
C9orf85	ENSG00000155621.14	protein_coding	KNOWN	2.07247	-0.330599
CA12	ENSG00000074410.13	protein_coding	KNOWN	4.27452	-0.620265
CAAP1	ENSG00000120159.11	protein_coding	KNOWN	2.03692	-0.819842
CALD1	ENSG00000122786.19	protein_coding	KNOWN	3.40579	1.40675
CAPG	ENSG00000042493.15	protein_coding	KNOWN	6.59792	0.118932
CAPZA1	ENSG00000116489.12	protein_coding	KNOWN	2.05669	0.0681628
CARD8	ENSG00000105483.16	protein_coding	KNOWN	2.16332	2.1458
CASC10	ENSG00000204682.5	protein_coding	KNOWN	2.78924	1.32992
CASC5	ENSG00000137812.19	protein_coding	KNOWN	7.14128	0.518939
CASP3	ENSG00000164305.17	protein_coding	KNOWN	3.2315	1.8484
CASP7	ENSG00000165806.19	protein_coding	KNOWN	4.47469	-0.337161
CCDC109B	ENSG00000005059.15	protein_coding	KNOWN	3.39133	0.419971
CCDC127	ENSG00000164366.3	protein_coding	KNOWN	2.24566	-1.49751
CCDC150	ENSG00000144395.17	protein_coding	KNOWN	4.83391	1.64531
CCDC163P	ENSG00000280670.2	protein_coding	KNOWN	4.40467	0.250093
CCDC18	ENSG00000122483.17	protein_coding	KNOWN	3.619	-2.23001
CCDC22	ENSG00000101997.12	protein_coding	KNOWN	2.54786	2.05648
CCDC77	ENSG00000120647.9	protein_coding	KNOWN	2.88606	-0.742541
CCDC8	ENSG00000169515.5	protein_coding	KNOWN	4.28783	2.77305
CCDC86	ENSG00000110104.11	protein_coding	KNOWN	2.18119	0
CCNA1	ENSG00000133101.9	protein_coding	KNOWN	2.02736	-0.735009
CCNA2	ENSG00000145386.9	protein_coding	KNOWN	5.35814	-0.214897
CCNB1	ENSG00000134057.14	protein_coding	KNOWN	5.17258	-1.16677
CCNB2	ENSG00000157456.7	protein_coding	KNOWN	6.09385	-0.571851
CCND1	ENSG00000110092.3	protein_coding	KNOWN	3.82398	1.0166
CCND2	ENSG00000118971.7	protein_coding	KNOWN	5.09863	-1.98613
CCNE2	ENSG00000175305.16	protein_coding	KNOWN	2.44534	-0.229285
CCNF	ENSG00000162063.12	protein_coding	KNOWN	3.12819	2.12564
CCNG1	ENSG00000113328.18	protein_coding	KNOWN	4.06883	-0.43454
CD164	ENSG00000135535.14	protein_coding	KNOWN	2.24121	-0.934787
CD58	ENSG00000116815.15	protein_coding	KNOWN	3.68066	-0.390329
CD82	ENSG00000085117.11	protein_coding	KNOWN	2.94334	0.0171189
CDC14A	ENSG00000079335.18	protein_coding	KNOWN	3.21317	1.29537
CDC20	ENSG00000117399.13	protein_coding	KNOWN	4.66134	0.182865
CDC25A	ENSG00000164045.11	protein_coding	KNOWN	3.28927	-0.014841
CDC25B	ENSG00000101224.17	protein_coding	KNOWN	2.15683	1.08666
CDC25C	ENSG00000158402.18	protein_coding	KNOWN	5.65632	0.859725
CDC42EP2	ENSG00000149798.4	protein_coding	KNOWN	2.77405	2.28898
CDC45	ENSG00000093009.9	protein_coding	KNOWN	5.5378	-0.448198
CDCA2	ENSG00000184661.13	protein_coding	KNOWN	4.52795	0.928647
CDCA3	ENSG00000111665.11	protein_coding	KNOWN	4.17315	0.050938
CDCA4	ENSG00000170779.10	protein_coding	KNOWN	5.39827	1.34217
CDCA5	ENSG00000146670.9	protein_coding	KNOWN	6.17037	0.818733
CDCA7	ENSG00000144354.13	protein_coding	KNOWN	4.08775	-1.44293
CDCA7L	ENSG00000164649.19	protein_coding	KNOWN	5.09184	1.11019
CDCA8	ENSG00000134690.10	protein_coding	KNOWN	6.36222	0.0719955
CDH10	ENSG00000040731.10	protein_coding	KNOWN	3.53827	-1.5693
CDH20	ENSG00000101542.9	protein_coding	KNOWN	4.01784	0.260343
CDH23	ENSG00000107736.19	protein_coding	KNOWN	3.18154	2.41221
CDH4	ENSG00000179242.15	protein_coding	KNOWN	2.96995	0.802005
CDHR1	ENSG00000148600.14	protein_coding	KNOWN	4.89969	0.0984106
CDK1	ENSG00000170312.15	protein_coding	KNOWN	7.01682	-0.324884
CDK2	ENSG00000123374.10	protein_coding	KNOWN	3.89575	-0.56498
CDK4	ENSG00000135446.16	protein_coding	KNOWN	2.95795	0.700591
CDK5RAP2	ENSG00000136861.17	protein_coding	KNOWN	4.36885	1.9393
CDK6	ENSG00000105810.9	protein_coding	KNOWN	2.13873	1.53292
CDKN2C	ENSG00000123080.10	protein_coding	KNOWN	4.90198	-0.394494
CDKN3	ENSG00000100526.19	protein_coding	KNOWN	5.8058	-0.152126
CDO1	ENSG00000129596.4	protein_coding	KNOWN	2.59488	2.75185
CDT1	ENSG00000167513.8	protein_coding	KNOWN	3.0966	0.926341
CELSR1	ENSG00000075275.16	protein_coding	KNOWN	2.61936	0.428194
CENPA	ENSG00000115163.14	protein_coding	KNOWN	4.45589	0.504041
CENPC	ENSG00000145241.10	protein_coding	KNOWN	3.41239	-0.240132
CENPE	ENSG00000138778.11	protein_coding	KNOWN	6.65776	0
CENPF	ENSG00000117724.12	protein_coding	KNOWN	7.16081	-0.297461
CENPH	ENSG00000153044.9	protein_coding	KNOWN	2.09395	0.00865833
CENPI	ENSG00000102384.13	protein_coding	KNOWN	4.98081	0.521591
CENPK	ENSG00000123219.12	protein_coding	KNOWN	6.7477	-0.0154982
CENPL	ENSG00000120334.15	protein_coding	KNOWN	3.98676	-0.141991
CENPM	ENSG00000100162.14	protein_coding	KNOWN	6.12573	0.133688
CENPN	ENSG00000166451.13	protein_coding	KNOWN	6.66185	0.898814
CENPO	ENSG00000138092.10	protein_coding	KNOWN	4.41827	1.60099
CENPP	ENSG00000188312.13	protein_coding	KNOWN	3.03915	0.03004
CENPQ	ENSG00000031691.6	protein_coding	KNOWN	4.63318	0.923651
CENPU	ENSG00000151725.11	protein_coding	KNOWN	6.70511	1.95238
CENPW	ENSG00000203760.8	protein_coding	KNOWN	3.29293	-1.40569
CEP112	ENSG00000154240.16	protein_coding	KNOWN	2.81026	1.11677
CEP135	ENSG00000174799.10	protein_coding	KNOWN	4.13818	-1.60448
CEP152	ENSG00000103995.13	protein_coding	KNOWN	4.90358	1.95165
CEP350	ENSG00000135837.15	protein_coding	KNOWN	2.55869	1.73136
CEP55	ENSG00000138180.15	protein_coding	KNOWN	6.00034	0.0606118
CEP57L1	ENSG00000183137.14	protein_coding	KNOWN	2.04863	-0.11135
CHAC2	ENSG00000143942.4	protein_coding	KNOWN	3.78611	0.934163
CHAF1A	ENSG00000167670.15	protein_coding	KNOWN	2.90102	0.155321
CHAF1B	ENSG00000159259.7	protein_coding	KNOWN	3.3025	0.555529
CHAMP1	ENSG00000198824.5	protein_coding	KNOWN	2.88732	0.930045
CHD1L	ENSG00000131778.17	protein_coding	KNOWN	2.23907	-0.445721
CHD7	ENSG00000171316.11	protein_coding	KNOWN	2.29711	-0.722433
CHEK1	ENSG00000149554.12	protein_coding	KNOWN	2.88192	-0.256103
CHEK2	ENSG00000183765.20	protein_coding	KNOWN	3.09669	0.197554
CHRDL1	ENSG00000101938.14	protein_coding	KNOWN	3.31335	-0.877552
CHST6	ENSG00000183196.8	protein_coding	KNOWN	2.44237	2.6405
CIT	ENSG00000122966.13	protein_coding	KNOWN	3.53284	1.3568
CKAP2	ENSG00000136108.14	protein_coding	KNOWN	5.49527	-0.46633
CKAP2L	ENSG00000169607.12	protein_coding	KNOWN	7.0761	-0.10932
CKAP5	ENSG00000175216.14	protein_coding	KNOWN	2.14751	-1.76567
CKB	ENSG00000166165.12	protein_coding	KNOWN	2.95877	-0.772238
CKS1B	ENSG00000173207.12	protein_coding	KNOWN	7.16077	0.186295
CKS2	ENSG00000123975.4	protein_coding	KNOWN	5.50028	-2.46644
CLCN5	ENSG00000171365.15	protein_coding	KNOWN	3.00452	0.38067
CLEC2D	ENSG00000069493.14	protein_coding	KNOWN	4.4051	-1.70327
CLSPN	ENSG00000092853.13	protein_coding	KNOWN	4.19064	-1.19936
CMBL	ENSG00000164237.8	protein_coding	KNOWN	2.99431	1.67174
CMSS1	ENSG00000184220.10	protein_coding	KNOWN	2.44732	0.776853
CMTM3	ENSG00000140931.19	protein_coding	KNOWN	6.38415	0.247874
CNBP	ENSG00000169714.16	protein_coding	KNOWN	3.30264	-1.12496
CNIH4	ENSG00000143771.11	protein_coding	KNOWN	2.01426	1.67663
CNKSR3	ENSG00000153721.17	protein_coding	KNOWN	2.27454	-1.30304
CNN3	ENSG00000117519.15	protein_coding	KNOWN	4.41867	-0.900948
CNNM4	ENSG00000158158.11	protein_coding	KNOWN	2.42098	2.81634
CNOT1	ENSG00000125107.16	protein_coding	KNOWN	2.01786	-1.44884
CNOT10	ENSG00000182973.18	protein_coding	KNOWN	2.99339	1.40859
CNP	ENSG00000173786.16	protein_coding	KNOWN	2.22307	0.201872
CNTFR	ENSG00000122756.14	protein_coding	KNOWN	2.57069	1.71251
CNTLN	ENSG00000044459.14	protein_coding	KNOWN	2.71295	-1.08057
CNTRL	ENSG00000119397.16	protein_coding	KNOWN	2.91433	1.02231
COA1	ENSG00000106603.17	protein_coding	KNOWN	2.13943	0.951393
COL11A1	ENSG00000060718.19	protein_coding	KNOWN	5.62396	0.771189
COL27A1	ENSG00000196739.14	protein_coding	KNOWN	2.49181	0
COL4A1	ENSG00000187498.14	protein_coding	KNOWN	2.34048	-1.03888
COL4A5	ENSG00000188153.12	protein_coding	KNOWN	7.03724	0.716898
COL4A6	ENSG00000197565.15	protein_coding	KNOWN	6.98813	0.356224
COL9A1	ENSG00000112280.15	protein_coding	KNOWN	5.74588	0.367261
COMMD10	ENSG00000145781.8	protein_coding	KNOWN	2.96094	-2.23022
CPNE2	ENSG00000140848.16	protein_coding	KNOWN	2.35163	1.07998
CPSF3	ENSG00000119203.13	protein_coding	KNOWN	2.4281	-0.218077
CPSF6	ENSG00000111605.16	protein_coding	KNOWN	1.99794	1.56005
CPT2	ENSG00000157184.5	protein_coding	KNOWN	2.98682	1.29725
CPXM1	ENSG00000088882.7	protein_coding	KNOWN	2.25456	1.29875
CREB3L2	ENSG00000182158.14	protein_coding	KNOWN	2.85851	0.708753
CREB5	ENSG00000146592.16	protein_coding	KNOWN	7.16081	0.143179
CRISPLD1	ENSG00000121005.8	protein_coding	KNOWN	2.06616	0.898114
CRYBG3	ENSG00000080200.9	protein_coding	KNOWN	2.13647	0.728527
CRYZ	ENSG00000116791.13	protein_coding	KNOWN	4.03773	-2.27988
CTDSP1	ENSG00000144579.7	protein_coding	KNOWN	3.56857	0.834148
CTDSPL2	ENSG00000137770.13	protein_coding	KNOWN	2.01141	0.456777
CTNNA1	ENSG00000044115.20	protein_coding	KNOWN	4.59326	-1.7306
CTNNAL1	ENSG00000119326.14	protein_coding	KNOWN	4.60009	1.38852
CTNND1	ENSG00000198561.13	protein_coding	KNOWN	2.17825	2.66914
CTNS	ENSG00000040531.14	protein_coding	KNOWN	2.84845	1.41874
CTPS1	ENSG00000171793.13	protein_coding	KNOWN	2.66226	0.0226263
CTSV	ENSG00000136943.10	protein_coding	KNOWN	5.275	-0.455811
CUEDC1	ENSG00000180891.12	protein_coding	KNOWN	3.06824	1.32024
CXCR4	ENSG00000121966.6	protein_coding	KNOWN	3.40879	-0.447136
CYBRD1	ENSG00000071967.11	protein_coding	KNOWN	2.90085	1.04002
CYP20A1	ENSG00000119004.14	protein_coding	KNOWN	3.42544	2.08808
CYR61	ENSG00000142871.15	protein_coding	KNOWN	4.53278	0.119143
CYTH3	ENSG00000008256.15	protein_coding	KNOWN	2.12204	1.04113
CYYR1	ENSG00000166265.11	protein_coding	KNOWN	2.14875	1.90557
DACH1	ENSG00000276644.4	protein_coding	KNOWN	4.19009	-1.19031
DAPK3	ENSG00000167657.11	protein_coding	KNOWN	2.13542	2.5936
DARS	ENSG00000115866.10	protein_coding	KNOWN	2.12534	-0.41185
DARS2	ENSG00000117593.9	protein_coding	KNOWN	2.83802	1.13688
DAXX	ENSG00000204209.10	protein_coding	KNOWN	2.51855	2.28839
DBF4	ENSG00000006634.7	protein_coding	KNOWN	6.12135	-0.565973
DBF4B	ENSG00000161692.17	protein_coding	KNOWN	2.51747	0.799227
DBI	ENSG00000155368.16	protein_coding	KNOWN	2.23588	-0.218544
DCLRE1A	ENSG00000198924.7	protein_coding	KNOWN	4.17912	0.0547225
DCLRE1C	ENSG00000152457.17	protein_coding	KNOWN	3.06845	1.67898
DCPS	ENSG00000110063.8	protein_coding	KNOWN	2.84944	1.38864
DCXR	ENSG00000169738.7	protein_coding	KNOWN	3.19569	2.27241
DDIAS	ENSG00000165490.12	protein_coding	KNOWN	5.11108	0.768486
DDX11	ENSG00000013573.16	protein_coding	KNOWN	4.06881	2.28293
DDX39A	ENSG00000123136.14	protein_coding	KNOWN	3.50734	0.407229
DDX60	ENSG00000137628.16	protein_coding	KNOWN	4.5628	2.18767
DEK	ENSG00000124795.14	protein_coding	KNOWN	4.49739	-0.451225
DEPDC1	ENSG00000024526.16	protein_coding	KNOWN	4.35412	-0.575834
DEPDC1B	ENSG00000035499.12	protein_coding	KNOWN	6.09981	1.54578
DEPDC4	ENSG00000166153.16	protein_coding	KNOWN	3.12144	1.63284
DHFR	ENSG00000228716.6	protein_coding	KNOWN	3.68657	0.697425
DHX32	ENSG00000089876.11	protein_coding	KNOWN	2.72445	-0.194503
DIAPH2	ENSG00000147202.17	protein_coding	KNOWN	1.99565	1.10469
DIAPH3	ENSG00000139734.17	protein_coding	KNOWN	4.78845	0
DLEU1	ENSG00000176124.11	protein_coding	KNOWN	4.04755	1.15768
DLGAP5	ENSG00000126787.12	protein_coding	KNOWN	6.97989	-0.357801
DMRT3	ENSG00000064218.4	protein_coding	KNOWN	3.10813	-0.115808
DMRTA2	ENSG00000142700.11	protein_coding	KNOWN	3.27316	-0.483029
DNA2	ENSG00000138346.14	protein_coding	KNOWN	2.98444	1.49353
DNAH14	ENSG00000185842.14	protein_coding	KNOWN	2.34203	0.162598
DNAI1	ENSG00000122735.15	protein_coding	KNOWN	2.41905	1.26476
DNAJB1	ENSG00000132002.7	protein_coding	KNOWN	2.3471	0.93117
DNAJC1	ENSG00000136770.10	protein_coding	KNOWN	1.98264	-0.545374
DNAJC21	ENSG00000168724.14	protein_coding	KNOWN	2.36452	-0.0183817
DNAJC3	ENSG00000102580.14	protein_coding	KNOWN	3.08201	1.83874
DNAJC9	ENSG00000213551.4	protein_coding	KNOWN	2.78263	1.62248
DNMT3A	ENSG00000119772.16	protein_coding	KNOWN	2.15943	-0.535758
DNPEP	ENSG00000123992.18	protein_coding	KNOWN	2.65776	0.683864
DNPH1	ENSG00000112667.12	protein_coding	KNOWN	2.44843	1.68103
DOC2A	ENSG00000149927.17	protein_coding	KNOWN	2.86189	2.56749
DOCK1	ENSG00000150760.12	protein_coding	KNOWN	5.92638	0.895155
DOK5	ENSG00000101134.11	protein_coding	KNOWN	2.93683	-1.35838
DPF2	ENSG00000133884.9	protein_coding	KNOWN	2.02307	1.10796
DPH6	ENSG00000134146.11	protein_coding	KNOWN	2.498	0.776581
DPPA4	ENSG00000121570.12	protein_coding	KNOWN	3.16296	1.92338
DSCC1	ENSG00000136982.5	protein_coding	KNOWN	3.70462	-0.196486
DSG2	ENSG00000046604.12	protein_coding	KNOWN	2.60235	-2.71168
DSN1	ENSG00000149636.15	protein_coding	KNOWN	3.50541	0.614803
DTL	ENSG00000143476.17	protein_coding	KNOWN	3.76718	0.689334
DTYMK	ENSG00000168393.12	protein_coding	KNOWN	3.82113	1.34781
DUS3L	ENSG00000141994.15	protein_coding	KNOWN	2.20732	1.99912
DUSP10	ENSG00000143507.17	protein_coding	KNOWN	2.94384	-1.80805
DUT	ENSG00000128951.13	protein_coding	KNOWN	2.25726	-1.89206
DVL2	ENSG00000004975.11	protein_coding	KNOWN	2.06934	0.475973
DYNC2H1	ENSG00000187240.13	protein_coding	KNOWN	2.05802	0
E2F2	ENSG00000007968.6	protein_coding	KNOWN	5.01158	-1.35739
E2F6	ENSG00000169016.16	protein_coding	KNOWN	2.50626	0.402609
E2F7	ENSG00000165891.15	protein_coding	KNOWN	7.13732	1.78287
E2F8	ENSG00000129173.12	protein_coding	KNOWN	5.3914	-0.205893
E4F1	ENSG00000167967.15	protein_coding	KNOWN	2.02219	1.40652
EARS2	ENSG00000103356.15	protein_coding	KNOWN	1.98241	-0.331026
EBF4	ENSG00000088881.20	protein_coding	KNOWN	2.55806	0.662108
ECI2	ENSG00000198721.12	protein_coding	KNOWN	4.07642	0.33139
ECM2	ENSG00000106823.12	protein_coding	KNOWN	2.54778	0.955324
ECT2	ENSG00000114346.13	protein_coding	KNOWN	5.59938	-1.24921
EDA2R	ENSG00000131080.14	protein_coding	KNOWN	4.57935	0.156869
EDNRB	ENSG00000136160.14	protein_coding	KNOWN	3.58781	1.25244
EEF1B2	ENSG00000114942.13	protein_coding	KNOWN	2.27479	-1.2535
EEPD1	ENSG00000122547.10	protein_coding	KNOWN	2.50128	-2.44663
EFCAB11	ENSG00000140025.15	protein_coding	KNOWN	2.78534	0.696805
EFCAB2	ENSG00000203666.12	protein_coding	KNOWN	2.61014	0.453982
EFHD1	ENSG00000115468.11	protein_coding	KNOWN	2.90049	1.07829
EFNB2	ENSG00000125266.6	protein_coding	KNOWN	2.50245	0.403166
EIF2D	ENSG00000143486.15	protein_coding	KNOWN	2.52734	-0.233878
EIF3B	ENSG00000106263.17	protein_coding	KNOWN	2.29009	1.29207
EIF4E	ENSG00000151247.12	protein_coding	KNOWN	2.64702	0.20662
ELF1	ENSG00000120690.14	protein_coding	KNOWN	5.24451	0.439065
ELOVL1	ENSG00000066322.12	protein_coding	KNOWN	2.13551	0.279496
ELP4	ENSG00000109911.17	protein_coding	KNOWN	2.80669	-0.704385
EMC9	ENSG00000100908.13	protein_coding	KNOWN	2.14012	0.361042
EME1	ENSG00000154920.14	protein_coding	KNOWN	5.32197	-0.789105
EMP2	ENSG00000213853.9	protein_coding	KNOWN	3.54451	0.487984
EMP3	ENSG00000142227.10	protein_coding	KNOWN	5.14062	-2.49293
EMX2	ENSG00000170370.11	protein_coding	KNOWN	2.71752	-0.821776
ENKUR	ENSG00000151023.16	protein_coding	KNOWN	2.41076	-0.0449762
ENO1	ENSG00000074800.13	protein_coding	KNOWN	4.39255	-0.744981
ENOSF1	ENSG00000132199.18	protein_coding	KNOWN	3.90969	2.37813
ENPP1	ENSG00000197594.11	protein_coding	KNOWN	3.49881	1.16865
EPHA2	ENSG00000142627.12	protein_coding	KNOWN	5.18485	0.0915437
EPHX2	ENSG00000120915.13	protein_coding	KNOWN	3.05466	2.81154
EPOR	ENSG00000187266.13	protein_coding	KNOWN	2.28008	0.589503
ERBB2	ENSG00000141736.13	protein_coding	KNOWN	4.19795	0.830167
ERBB2IP	ENSG00000112851.14	protein_coding	KNOWN	2.64641	-0.427382
ERCC6L	ENSG00000186871.6	protein_coding	KNOWN	4.26447	-0.258137
ERI1	ENSG00000104626.14	protein_coding	KNOWN	4.06056	0.981446
ERI2	ENSG00000196678.13	protein_coding	KNOWN	2.30613	-0.245649
ERLIN1	ENSG00000107566.13	protein_coding	KNOWN	2.45276	-1.28405
ERMARD	ENSG00000130023.15	protein_coding	KNOWN	2.32379	0.448371
ESCO2	ENSG00000171320.14	protein_coding	KNOWN	5.55413	-0.224144
ESPL1	ENSG00000135476.11	protein_coding	KNOWN	6.26812	0.569551
ESR2	ENSG00000140009.18	protein_coding	KNOWN	2.97975	0.0898521
ESRRG	ENSG00000196482.16	protein_coding	KNOWN	3.54718	-0.301732
ETV5	ENSG00000244405.7	protein_coding	KNOWN	5.64212	-0.657539
EVC	ENSG00000072840.12	protein_coding	KNOWN	2.29133	-2.40733
EXO1	ENSG00000174371.16	protein_coding	KNOWN	5.90216	0.256878
EXOSC8	ENSG00000120699.12	protein_coding	KNOWN	3.33961	1.52316
EXPH5	ENSG00000110723.11	protein_coding	KNOWN	5.33972	0.695068
EZH2	ENSG00000106462.10	protein_coding	KNOWN	2.40182	2.14155
EZR	ENSG00000092820.17	protein_coding	KNOWN	4.26468	0.440308
F2RL2	ENSG00000164220.6	protein_coding	KNOWN	2.41926	2.17849
FABP7	ENSG00000164434.11	protein_coding	KNOWN	7.16081	0.0590745
FAIM	ENSG00000158234.12	protein_coding	KNOWN	2.21286	2.12744
FAM105A	ENSG00000145569.5	protein_coding	KNOWN	3.47512	-0.246483
FAM107A	ENSG00000168309.16	protein_coding	KNOWN	2.77547	-0.743278
FAM114A1	ENSG00000197712.11	protein_coding	KNOWN	3.76712	1.62151
FAM122B	ENSG00000156504.16	protein_coding	KNOWN	3.05383	-0.666135
FAM136A	ENSG00000035141.7	protein_coding	KNOWN	3.13785	2.42651
FAM171B	ENSG00000144369.12	protein_coding	KNOWN	2.55292	-1.45843
FAM181A	ENSG00000140067.6	protein_coding	KNOWN	4.0445	2.74839
FAM210B	ENSG00000124098.9	protein_coding	KNOWN	2.12212	0.882974
FAM57A	ENSG00000167695.14	protein_coding	KNOWN	3.80801	-0.0194378
FAM64A	ENSG00000129195.15	protein_coding	KNOWN	7.10224	1.1415
FAM92A1	ENSG00000188343.12	protein_coding	KNOWN	2.39105	0.804986
FANCA	ENSG00000187741.14	protein_coding	KNOWN	3.10197	0.41163
FANCB	ENSG00000181544.13	protein_coding	KNOWN	3.24466	1.01608
FANCD2	ENSG00000144554.10	protein_coding	KNOWN	6.18645	1.85134
FANCG	ENSG00000221829.9	protein_coding	KNOWN	6.00728	2.19498
FANCI	ENSG00000140525.17	protein_coding	KNOWN	3.47869	1.19014
FANCM	ENSG00000187790.10	protein_coding	KNOWN	2.20902	0.591847
FAP	ENSG00000078098.13	protein_coding	KNOWN	2.04789	-2.90921
FAT1	ENSG00000083857.13	protein_coding	KNOWN	4.96039	-0.394362
FAXDC2	ENSG00000170271.10	protein_coding	KNOWN	3.57416	-0.255813
FBL	ENSG00000105202.7	protein_coding	KNOWN	2.25061	0.30993
FBN2	ENSG00000138829.10	protein_coding	KNOWN	2.6315	-0.313173
FBXL7	ENSG00000183580.9	protein_coding	KNOWN	3.15471	-1.52689
FBXO32	ENSG00000156804.7	protein_coding	KNOWN	2.9413	1.18389
FBXO46	ENSG00000177051.5	protein_coding	KNOWN	2.37375	-0.7609
FBXO5	ENSG00000112029.9	protein_coding	KNOWN	4.80751	1.99843
FEN1	ENSG00000168496.3	protein_coding	KNOWN	2.53142	0.726107
FERMT2	ENSG00000073712.14	protein_coding	KNOWN	2.43971	1.09293
FGF2	ENSG00000138685.12	protein_coding	KNOWN	2.39047	0.148161
FGFBP3	ENSG00000174721.9	protein_coding	KNOWN	4.252	-0.68309
FGFR1	ENSG00000077782.19	protein_coding	KNOWN	5.74881	0
FGFR1OP	ENSG00000213066.11	protein_coding	KNOWN	2.88964	0
FGFR2	ENSG00000066468.20	protein_coding	KNOWN	3.69825	0
FGFR3	ENSG00000068078.17	protein_coding	KNOWN	4.92012	2.81404
FHL2	ENSG00000115641.18	protein_coding	KNOWN	3.19971	0.421626
FILIP1	ENSG00000118407.14	protein_coding	KNOWN	3.91729	1.11552
FITM2	ENSG00000197296.5	protein_coding	KNOWN	3.40221	0.0167664
FKBP10	ENSG00000141756.18	protein_coding	KNOWN	1.97866	-0.497342
FKBP5	ENSG00000096060.14	protein_coding	KNOWN	2.51464	0.942519
FKBP9	ENSG00000122642.10	protein_coding	KNOWN	3.56084	-1.58775
FKRP	ENSG00000181027.10	protein_coding	KNOWN	2.00916	0.0583551
FN3KRP	ENSG00000141560.14	protein_coding	KNOWN	2.91903	2.13308
FOS	ENSG00000170345.9	protein_coding	KNOWN	2.79303	0
FOXN4	ENSG00000139445.17	protein_coding	KNOWN	4.70721	0.564989
FOXP1	ENSG00000114861.18	protein_coding	KNOWN	5.70869	0.769113
FRMD5	ENSG00000171877.19	protein_coding	KNOWN	2.28146	0.26209
FRMD6	ENSG00000139926.15	protein_coding	KNOWN	2.08631	0.168149
FSTL1	ENSG00000163430.9	protein_coding	KNOWN	5.14152	-0.0849631
FUCA2	ENSG00000001036.13	protein_coding	KNOWN	3.55359	1.75932
FUT10	ENSG00000172728.15	protein_coding	KNOWN	2.29264	-0.88276
FUT8	ENSG00000033170.16	protein_coding	KNOWN	3.16914	0.314378
FYCO1	ENSG00000163820.14	protein_coding	KNOWN	4.31569	-1.71936
FZD7	ENSG00000155760.2	protein_coding	KNOWN	3.49064	-1.6086
FZD8	ENSG00000177283.5	protein_coding	KNOWN	3.65924	-0.214384
G3BP1	ENSG00000145907.14	protein_coding	KNOWN	3.08325	1.14005
GALK1	ENSG00000108479.11	protein_coding	KNOWN	2.88531	2.01234
GALM	ENSG00000143891.16	protein_coding	KNOWN	2.05736	-0.506695
GALNT10	ENSG00000164574.15	protein_coding	KNOWN	2.66724	-0.379565
GALNT7	ENSG00000109586.11	protein_coding	KNOWN	3.76596	0.541836
GAMT	ENSG00000130005.11	protein_coding	KNOWN	2.19677	1.91271
GANAB	ENSG00000089597.16	protein_coding	KNOWN	2.1219	0.463251
GAPDH	ENSG00000111640.14	protein_coding	KNOWN	5.74491	1.9014
GAS1	ENSG00000180447.6	protein_coding	KNOWN	5.39276	0.424047
GAS2	ENSG00000148935.10	protein_coding	KNOWN	2.35601	-0.973472
GAS2L3	ENSG00000139354.10	protein_coding	KNOWN	3.65626	0.17854
GATAD1	ENSG00000157259.6	protein_coding	KNOWN	2.75948	0.149659
GATM	ENSG00000171766.15	protein_coding	KNOWN	4.94475	-0.783024
GBE1	ENSG00000114480.12	protein_coding	KNOWN	5.48037	-0.0234834
GCC1	ENSG00000179562.2	protein_coding	KNOWN	2.38948	2.38407
GCNT4	ENSG00000176928.5	protein_coding	KNOWN	5.21733	0.505545
GCSH	ENSG00000140905.9	protein_coding	KNOWN	2.41526	-0.807904
GDI2	ENSG00000057608.16	protein_coding	KNOWN	3.69377	1.24166
GEN1	ENSG00000178295.14	protein_coding	KNOWN	4.06473	1.88482
GGH	ENSG00000137563.11	protein_coding	KNOWN	2.37167	1.84375
GIN1	ENSG00000145723.16	protein_coding	KNOWN	2.1345	1.08089
GINS1	ENSG00000101003.9	protein_coding	KNOWN	3.81839	2.2882
GINS2	ENSG00000131153.8	protein_coding	KNOWN	5.78645	0.887306
GINS3	ENSG00000181938.13	protein_coding	KNOWN	3.28891	0.727527
GINS4	ENSG00000147536.11	protein_coding	KNOWN	3.65224	-0.521921
GKAP1	ENSG00000165113.12	protein_coding	KNOWN	2.99037	1.6508
GLCCI1	ENSG00000106415.12	protein_coding	KNOWN	2.57384	1.9026
GLI2	ENSG00000074047.20	protein_coding	KNOWN	3.37758	-0.734831
GLI3	ENSG00000106571.12	protein_coding	KNOWN	7.16081	-0.95411
GLMP	ENSG00000198715.11	protein_coding	KNOWN	4.80906	0.593026
GLO1	ENSG00000124767.6	protein_coding	KNOWN	2.04578	-0.0910181
GLUL	ENSG00000135821.16	protein_coding	KNOWN	3.56821	0.310339
GLYATL1	ENSG00000166840.13	protein_coding	KNOWN	2.4226	1.3079
GLYATL2	ENSG00000156689.6	protein_coding	KNOWN	3.79906	2.5291
GM2A	ENSG00000196743.8	protein_coding	KNOWN	3.56251	0.953772
GMNN	ENSG00000112312.9	protein_coding	KNOWN	5.72124	-0.545937
GNB2L1	ENSG00000204628.11	protein_coding	KNOWN	3.59067	0.229935
GNG5	ENSG00000174021.10	protein_coding	KNOWN	5.7037	-2.79618
GOLIM4	ENSG00000173905.8	protein_coding	KNOWN	2.08474	-0.501359
GPANK1	ENSG00000204438.10	protein_coding	KNOWN	2.03973	-0.811781
GPATCH3	ENSG00000198746.12	protein_coding	KNOWN	2.1524	-0.379088
GPC4	ENSG00000076716.8	protein_coding	KNOWN	4.68121	-0.611655
GPC6	ENSG00000183098.10	protein_coding	KNOWN	2.31609	-0.778016
GPR108	ENSG00000125734.13	protein_coding	KNOWN	3.0578	1.25345
GPR3	ENSG00000181773.6	protein_coding	KNOWN	2.45847	0.431586
GPR50	ENSG00000102195.8	protein_coding	KNOWN	4.77094	2.48674
GPR63	ENSG00000112218.8	protein_coding	KNOWN	2.22823	-1.13242
GPSM2	ENSG00000121957.12	protein_coding	KNOWN	2.32889	0.254059
GPX4	ENSG00000167468.16	protein_coding	KNOWN	2.0019	0.884687
GPX8	ENSG00000164294.13	protein_coding	KNOWN	5.03285	-0.839481
GRAMD1C	ENSG00000178075.19	protein_coding	KNOWN	4.42178	-0.0844347
GRHL2	ENSG00000083307.10	protein_coding	KNOWN	3.38572	2.11972
GSTM4	ENSG00000168765.15	protein_coding	KNOWN	2.59573	0.846894
GSTO1	ENSG00000148834.12	protein_coding	KNOWN	4.40226	1.90555
GSTP1	ENSG00000084207.15	protein_coding	KNOWN	4.92802	1.37399
GTF3C4	ENSG00000125484.11	protein_coding	KNOWN	2.14693	-0.655368
GTPBP2	ENSG00000172432.18	protein_coding	KNOWN	3.15715	1.68
GTSE1	ENSG00000075218.18	protein_coding	KNOWN	6.78173	0.572716
GULP1	ENSG00000144366.15	protein_coding	KNOWN	3.49616	-1.15665
GXYLT1	ENSG00000151233.10	protein_coding	KNOWN	2.7317	0.0994258
GYG1	ENSG00000163754.17	protein_coding	KNOWN	6.58552	0.552387
H2AFJ	ENSG00000246705.4	protein_coding	KNOWN	2.45314	2.38742
H2AFZ	ENSG00000164032.11	protein_coding	KNOWN	4.88978	-1.96015
HABP4	ENSG00000130956.13	protein_coding	KNOWN	2.63005	0.655987
HADH	ENSG00000138796.15	protein_coding	KNOWN	2.37931	0.466321
HADHA	ENSG00000084754.10	protein_coding	KNOWN	2.05309	2.68064
HAT1	ENSG00000128708.12	protein_coding	KNOWN	2.83114	-1.25778
HAUS1	ENSG00000152240.12	protein_coding	KNOWN	2.15388	0.835207
HAUS4	ENSG00000092036.16	protein_coding	KNOWN	2.62817	-0.308252
HAUS5	ENSG00000249115.8	protein_coding	KNOWN	2.74239	2.56436
HAUS6	ENSG00000147874.10	protein_coding	KNOWN	2.43028	-1.1494
HAUS8	ENSG00000131351.14	protein_coding	KNOWN	3.38016	-0.360397
HDAC1	ENSG00000116478.11	protein_coding	KNOWN	1.98745	-0.0572816
HDAC11	ENSG00000163517.14	protein_coding	KNOWN	3.10903	2.79981
HDAC4	ENSG00000068024.16	protein_coding	KNOWN	2.05636	1.72748
HDAC9	ENSG00000048052.21	protein_coding	KNOWN	3.3575	1.53085
HDDC2	ENSG00000111906.17	protein_coding	KNOWN	2.08558	-1.06567
HEBP1	ENSG00000013583.8	protein_coding	KNOWN	4.64664	-0.616704
HEBP2	ENSG00000051620.10	protein_coding	KNOWN	2.6492	2.6104
HEG1	ENSG00000173706.12	protein_coding	KNOWN	3.66964	-0.207249
HELLS	ENSG00000119969.14	protein_coding	KNOWN	5.15773	-0.163819
HES1	ENSG00000114315.3	protein_coding	KNOWN	5.91584	-1.27715
HES5	ENSG00000197921.5	protein_coding	KNOWN	3.07401	0.562272
HEY1	ENSG00000164683.16	protein_coding	KNOWN	4.70004	2.11598
HEY2	ENSG00000135547.8	protein_coding	KNOWN	4.59088	-0.815545
HHAT	ENSG00000054392.12	protein_coding	KNOWN	2.2639	1.74072
HIBADH	ENSG00000106049.8	protein_coding	KNOWN	2.61312	0.175983
HIBCH	ENSG00000198130.14	protein_coding	KNOWN	2.83686	0.645917
HIPK2	ENSG00000064393.15	protein_coding	KNOWN	2.9319	1.83601
HIRIP3	ENSG00000149929.15	protein_coding	KNOWN	2.55389	1.02358
HIST1H1B	ENSG00000184357.4	protein_coding	KNOWN	7.1413	1.65323
HIST1H1C	ENSG00000187837.3	protein_coding	KNOWN	3.88913	0.542359
HIST1H1D	ENSG00000124575.6	protein_coding	KNOWN	2.46161	-1.71552
HIST1H1E	ENSG00000168298.6	protein_coding	KNOWN	3.03012	0.978146
HIST1H2BH	ENSG00000275713.2	protein_coding	KNOWN	3.53336	1.89385
HIST1H4C	ENSG00000197061.4	protein_coding	KNOWN	4.96052	1.33102
HIST2H2AC	ENSG00000184260.5	protein_coding	KNOWN	3.04668	0.337926
HIST3H2A	ENSG00000181218.5	protein_coding	KNOWN	3.64955	2.25234
HJURP	ENSG00000123485.11	protein_coding	KNOWN	6.34736	0.579705
HMG20B	ENSG00000064961.18	protein_coding	KNOWN	2.16601	0.275719
HMGA2	ENSG00000149948.13	protein_coding	KNOWN	7.15721	0.185424
HMGB1	ENSG00000189403.14	protein_coding	KNOWN	5.87671	-0.44984
HMGB2	ENSG00000164104.11	protein_coding	KNOWN	7.16081	-0.638023
HMGN5	ENSG00000198157.10	protein_coding	KNOWN	3.16802	0.652931
HMMR	ENSG00000072571.19	protein_coding	KNOWN	5.20398	-1.1044
HN1L	ENSG00000206053.12	protein_coding	KNOWN	2.20866	0.867946
HNRNPA2B1	ENSG00000122566.20	protein_coding	KNOWN	6.1819	-1.87752
HNRNPR	ENSG00000125944.18	protein_coding	KNOWN	3.17123	-0.0785728
HP1BP3	ENSG00000127483.17	protein_coding	KNOWN	2.24368	1.32508
HRK	ENSG00000135116.9	protein_coding	KNOWN	3.066	-1.76757
HRSP12	ENSG00000132541.10	protein_coding	KNOWN	3.94885	-1.36449
HS6ST2	ENSG00000171004.17	protein_coding	KNOWN	3.23433	1.47049
HSD17B11	ENSG00000198189.10	protein_coding	KNOWN	2.31738	-0.430602
HSP90B1	ENSG00000166598.12	protein_coding	KNOWN	2.47133	-1.20377
HSPA4L	ENSG00000164070.11	protein_coding	KNOWN	2.4991	1.0322
HSPB1	ENSG00000106211.8	protein_coding	KNOWN	3.09101	0.480185
HSPG2	ENSG00000142798.17	protein_coding	KNOWN	4.53713	2.42491
HTR2A	ENSG00000102468.10	protein_coding	KNOWN	4.65455	2.14786
HTRA1	ENSG00000166033.11	protein_coding	KNOWN	4.14063	-2.4744
IARS	ENSG00000196305.17	protein_coding	KNOWN	2.9908	-0.461023
ICE2	ENSG00000128915.11	protein_coding	KNOWN	2.51933	-1.51083
ID3	ENSG00000117318.8	protein_coding	KNOWN	3.96664	-1.69617
ID4	ENSG00000172201.10	protein_coding	KNOWN	5.91063	-0.496321
IFRD2	ENSG00000214706.10	protein_coding	KNOWN	2.70416	-0.839046
IGFBP2	ENSG00000115457.9	protein_coding	KNOWN	2.31566	-0.160284
IGFBP4	ENSG00000141753.6	protein_coding	KNOWN	3.43329	0.0462704
IGSF9	ENSG00000085552.16	protein_coding	KNOWN	2.22577	0.133246
IKBIP	ENSG00000166130.14	protein_coding	KNOWN	3.61777	0.332168
IL13RA1	ENSG00000131724.10	protein_coding	KNOWN	5.14835	-0.210074
IL1RAPL1	ENSG00000169306.9	protein_coding	KNOWN	2.92359	-0.788942
ILF2	ENSG00000143621.16	protein_coding	KNOWN	2.39001	-0.213216
IMMP1L	ENSG00000148950.9	protein_coding	KNOWN	2.70623	-0.422803
IMPA2	ENSG00000141401.11	protein_coding	KNOWN	2.72614	0.856155
IMPACT	ENSG00000154059.9	protein_coding	KNOWN	2.63231	-0.374957
IMPDH2	ENSG00000178035.11	protein_coding	KNOWN	3.40042	-0.173862
INCENP	ENSG00000149503.12	protein_coding	KNOWN	2.42185	0.305978
ING3	ENSG00000071243.15	protein_coding	KNOWN	2.53829	-0.157465
ING5	ENSG00000168395.14	protein_coding	KNOWN	2.08464	-0.729895
INHBB	ENSG00000163083.5	protein_coding	KNOWN	3.97937	0.424028
INTU	ENSG00000164066.12	protein_coding	KNOWN	3.26641	-2.38876
IPO5	ENSG00000065150.18	protein_coding	KNOWN	2.32765	-0.507478
IQGAP2	ENSG00000145703.15	protein_coding	KNOWN	6.93003	-0.972931
IQGAP3	ENSG00000183856.10	protein_coding	KNOWN	7.10288	-0.25759
IRF2	ENSG00000168310.10	protein_coding	KNOWN	3.71582	-0.461784
ISYNA1	ENSG00000105655.18	protein_coding	KNOWN	2.1577	0.43908
ITGA2	ENSG00000164171.10	protein_coding	KNOWN	4.36474	-1.23032
ITGAV	ENSG00000138448.11	protein_coding	KNOWN	2.14189	0.335897
ITPKB	ENSG00000143772.9	protein_coding	KNOWN	2.42812	1.64838
ITPRIPL1	ENSG00000198885.9	protein_coding	KNOWN	3.32312	0.985806
IVD	ENSG00000128928.8	protein_coding	KNOWN	2.22553	0.893329
JADE1	ENSG00000077684.15	protein_coding	KNOWN	5.80053	0
JAM2	ENSG00000154721.14	protein_coding	KNOWN	5.01933	1.07028
JAM3	ENSG00000166086.12	protein_coding	KNOWN	3.66668	2.18509
JKAMP	ENSG00000050130.17	protein_coding	KNOWN	2.36709	-2.08845
KAT2B	ENSG00000114166.7	protein_coding	KNOWN	3.97607	0.691193
KCNJ14	ENSG00000182324.6	protein_coding	KNOWN	2.17067	1.92072
KCTD3	ENSG00000136636.12	protein_coding	KNOWN	2.6966	-0.931952
KDELC2	ENSG00000178202.12	protein_coding	KNOWN	2.934	0.516249
KEAP1	ENSG00000079999.13	protein_coding	KNOWN	2.4665	0.687415
KHNYN	ENSG00000100441.9	protein_coding	KNOWN	3.99259	0.973715
KIAA1161	ENSG00000164976.8	protein_coding	KNOWN	4.20732	-0.0996774
KIAA1217	ENSG00000120549.16	protein_coding	KNOWN	6.18787	-0.488291
KIAA1524	ENSG00000163507.13	protein_coding	KNOWN	5.30769	-0.383405
KIF11	ENSG00000138160.5	protein_coding	KNOWN	7.15698	0.865061
KIF13A	ENSG00000137177.18	protein_coding	KNOWN	3.46934	-0.450321
KIF13B	ENSG00000197892.12	protein_coding	KNOWN	4.5973	0.0724268
KIF14	ENSG00000118193.11	protein_coding	KNOWN	5.32581	0.235017
KIF15	ENSG00000163808.16	protein_coding	KNOWN	7.16052	0.234441
KIF18A	ENSG00000121621.6	protein_coding	KNOWN	6.58054	0.334503
KIF18B	ENSG00000186185.13	protein_coding	KNOWN	6.51468	-1.80832
KIF20A	ENSG00000112984.11	protein_coding	KNOWN	5.62873	-1.81105
KIF20B	ENSG00000138182.14	protein_coding	KNOWN	5.6834	-0.547864
KIF22	ENSG00000079616.12	protein_coding	KNOWN	5.10833	0.369315
KIF23	ENSG00000137807.13	protein_coding	KNOWN	6.52187	0
KIF24	ENSG00000186638.15	protein_coding	KNOWN	3.48691	0.294116
KIF2C	ENSG00000142945.12	protein_coding	KNOWN	6.7727	0.715475
KIF4A	ENSG00000090889.11	protein_coding	KNOWN	5.36413	0.124602
KIF7	ENSG00000166813.14	protein_coding	KNOWN	2.0349	-0.0487072
KIFC1	ENSG00000237649.7	protein_coding	KNOWN	5.29497	1.03401
KLF4	ENSG00000136826.14	protein_coding	KNOWN	4.7578	-0.344152
KMT2C	ENSG00000055609.17	protein_coding	KNOWN	2.36113	2.29546
KNSTRN	ENSG00000128944.13	protein_coding	KNOWN	2.55562	0.383513
KNTC1	ENSG00000184445.11	protein_coding	KNOWN	6.97885	2.4964
KPNA2	ENSG00000182481.8	protein_coding	KNOWN	5.08202	-0.102635
L3MBTL1	ENSG00000185513.14	protein_coding	KNOWN	2.84957	2.74954
LACTB2	ENSG00000147592.8	protein_coding	KNOWN	3.17377	-0.254272
LAMA1	ENSG00000101680.13	protein_coding	KNOWN	4.14926	1.54591
LAMA3	ENSG00000053747.15	protein_coding	KNOWN	4.01349	0.309595
LAMB2	ENSG00000172037.13	protein_coding	KNOWN	4.22435	1.39161
LANCL2	ENSG00000132434.9	protein_coding	KNOWN	2.02957	0.908016
LAPTM4B	ENSG00000104341.16	protein_coding	KNOWN	2.31351	0.844567
LARP7	ENSG00000174720.15	protein_coding	KNOWN	2.41018	0.0880357
LBR	ENSG00000143815.14	protein_coding	KNOWN	3.29052	-0.207489
LDLRAD4	ENSG00000168675.18	protein_coding	KNOWN	2.58908	0.442237
LEF1	ENSG00000138795.9	protein_coding	KNOWN	2.92517	0.973207
LGALS3	ENSG00000131981.15	protein_coding	KNOWN	3.53826	0.673835
LGALS3BP	ENSG00000108679.12	protein_coding	KNOWN	3.08067	1.80768
LHFPL2	ENSG00000145685.13	protein_coding	KNOWN	2.66182	0.00852746
LHX2	ENSG00000106689.10	protein_coding	KNOWN	2.50799	-1.29388
LIFR	ENSG00000113594.9	protein_coding	KNOWN	4.65784	-0.857441
LIMA1	ENSG00000050405.13	protein_coding	KNOWN	3.09151	0.853298
LIMD1	ENSG00000144791.9	protein_coding	KNOWN	2.15287	1.35061
LIN52	ENSG00000205659.10	protein_coding	KNOWN	2.07371	0.675531
LIN54	ENSG00000189308.10	protein_coding	KNOWN	2.06446	1.29199
LIN9	ENSG00000183814.15	protein_coding	KNOWN	2.22303	-0.967271
LIPG	ENSG00000101670.11	protein_coding	KNOWN	4.73825	-0.182459
LIPT1	ENSG00000144182.16	protein_coding	KNOWN	4.37866	0.567674
LIX1	ENSG00000145721.11	protein_coding	KNOWN	7.16081	2.39102
LPCAT3	ENSG00000111684.10	protein_coding	KNOWN	2.35779	2.20983
LRIG3	ENSG00000139263.11	protein_coding	KNOWN	6.37719	0.302871
LRP10	ENSG00000197324.8	protein_coding	KNOWN	2.11439	-1.03695
LRP4	ENSG00000134569.9	protein_coding	KNOWN	4.62087	-0.939623
LRP6	ENSG00000070018.8	protein_coding	KNOWN	2.40294	-0.0558999
LRR1	ENSG00000165501.16	protein_coding	KNOWN	4.77308	0.688961
LRRC17	ENSG00000128606.12	protein_coding	KNOWN	2.70279	1.4802
LSM8	ENSG00000128534.7	protein_coding	KNOWN	2.40848	-1.06266
LTA4H	ENSG00000111144.9	protein_coding	KNOWN	2.67228	-0.0392806
LTBP1	ENSG00000049323.15	protein_coding	KNOWN	6.04555	-2.82656
LZTS2	ENSG00000107816.17	protein_coding	KNOWN	2.93926	1.58809
MAD2L1	ENSG00000164109.13	protein_coding	KNOWN	5.72169	-1.35064
MAGOHB	ENSG00000111196.9	protein_coding	KNOWN	2.36475	2.13728
MAGT1	ENSG00000102158.19	protein_coding	KNOWN	3.88333	-0.397391
MAP3K8	ENSG00000107968.9	protein_coding	KNOWN	4.35955	-0.843665
MAPK4	ENSG00000141639.11	protein_coding	KNOWN	2.08387	2.16524
MAPKAPK3	ENSG00000114738.10	protein_coding	KNOWN	2.9842	0
MASP1	ENSG00000127241.16	protein_coding	KNOWN	2.29764	2.28965
MASTL	ENSG00000120539.14	protein_coding	KNOWN	5.7809	1.46314
MAT2B	ENSG00000038274.16	protein_coding	KNOWN	5.27005	0.385703
MBNL1	ENSG00000152601.17	protein_coding	KNOWN	1.98835	0.0502455
MBNL3	ENSG00000076770.14	protein_coding	KNOWN	3.71102	-0.211001
MCAM	ENSG00000076706.14	protein_coding	KNOWN	3.22652	0.786261
MCM10	ENSG00000065328.16	protein_coding	KNOWN	3.90556	-0.0326498
MCM2	ENSG00000073111.13	protein_coding	KNOWN	5.53155	2.59762
MCM3	ENSG00000112118.17	protein_coding	KNOWN	6.25841	2.77435
MCM4	ENSG00000104738.16	protein_coding	KNOWN	3.13266	-0.666177
MCM5	ENSG00000100297.15	protein_coding	KNOWN	4.50059	1.54563
MCM6	ENSG00000076003.4	protein_coding	KNOWN	2.66869	0
MCM7	ENSG00000166508.17	protein_coding	KNOWN	5.64182	2.70413
MCM8	ENSG00000125885.13	protein_coding	KNOWN	5.94898	1.51008
MCM9	ENSG00000111877.17	protein_coding	KNOWN	2.57161	-1.04154
MCMBP	ENSG00000197771.12	protein_coding	KNOWN	2.15953	0.646892
MDC1	ENSG00000137337.14	protein_coding	KNOWN	2.2503	-0.107158
MDFIC	ENSG00000135272.9	protein_coding	KNOWN	2.4111	0.159217
MDM1	ENSG00000111554.14	protein_coding	KNOWN	3.85735	-1.3137
MECOM	ENSG00000085276.17	protein_coding	KNOWN	2.44989	1.60755
MED16	ENSG00000175221.14	protein_coding	KNOWN	2.67518	1.86429
MED18	ENSG00000130772.13	protein_coding	KNOWN	2.17951	1.41247
MED25	ENSG00000104973.14	protein_coding	KNOWN	2.29915	1.00657
MED28	ENSG00000118579.11	protein_coding	KNOWN	2.40027	1.9246
MEGF10	ENSG00000145794.16	protein_coding	KNOWN	4.54022	0.63426
MEIS1	ENSG00000143995.19	protein_coding	KNOWN	3.18931	1.16636
MEIS2	ENSG00000134138.19	protein_coding	KNOWN	3.82015	2.03497
MELK	ENSG00000165304.7	protein_coding	KNOWN	6.07078	-0.0985031
MEPCE	ENSG00000146834.13	protein_coding	KNOWN	2.54182	-0.388863
MERTK	ENSG00000153208.16	protein_coding	KNOWN	4.85846	-1.26657
METTL1	ENSG00000037897.16	protein_coding	KNOWN	2.90712	1.01664
MFAP2	ENSG00000117122.13	protein_coding	KNOWN	4.49398	0.287397
MFSD2A	ENSG00000168389.17	protein_coding	KNOWN	2.08064	1.02452
MGARP	ENSG00000137463.4	protein_coding	KNOWN	2.20309	2.39459
MGME1	ENSG00000125871.13	protein_coding	KNOWN	4.08522	0.348973
MGMT	ENSG00000170430.9	protein_coding	KNOWN	2.23284	-0.401899
MID1	ENSG00000101871.14	protein_coding	KNOWN	2.72979	0.749212
MINA	ENSG00000170854.17	protein_coding	KNOWN	3.02295	0.140602
MINPP1	ENSG00000107789.15	protein_coding	KNOWN	3.35827	0.576625
MIPEP	ENSG00000027001.9	protein_coding	KNOWN	2.57098	1.03051
MIS18BP1	ENSG00000129534.13	protein_coding	KNOWN	7.14331	-0.122856
MITF	ENSG00000187098.14	protein_coding	KNOWN	3.07414	1.50022
MKI67	ENSG00000148773.12	protein_coding	KNOWN	7.16081	0.829316
MLC1	ENSG00000100427.15	protein_coding	KNOWN	3.86794	-0.453449
MMACHC	ENSG00000132763.14	protein_coding	KNOWN	3.49692	2.70613
MND1	ENSG00000121211.7	protein_coding	KNOWN	4.44659	0.118653
MNS1	ENSG00000138587.5	protein_coding	KNOWN	2.50152	0.988101
MOB3B	ENSG00000120162.9	protein_coding	KNOWN	4.92665	-0.879347
MON1A	ENSG00000164077.13	protein_coding	KNOWN	1.99808	1.01505
MORC4	ENSG00000133131.14	protein_coding	KNOWN	3.07009	1.24489
MOV10	ENSG00000155363.18	protein_coding	KNOWN	2.49806	-1.09229
MPDZ	ENSG00000107186.16	protein_coding	KNOWN	2.80553	1.06069
MPHOSPH9	ENSG00000051825.14	protein_coding	KNOWN	2.22023	0.227226
MPP5	ENSG00000072415.8	protein_coding	KNOWN	3.45268	-1.47607
MPPED2	ENSG00000066382.16	protein_coding	KNOWN	4.51515	-1.19872
MRC2	ENSG00000011028.13	protein_coding	KNOWN	2.68335	0.796588
MRE11A	ENSG00000020922.12	protein_coding	KNOWN	2.98358	0.783592
MROH8	ENSG00000101353.14	protein_coding	KNOWN	3.13185	1.41346
MRPL47	ENSG00000136522.13	protein_coding	KNOWN	2.21005	0.861943
MRPS18A	ENSG00000096080.11	protein_coding	KNOWN	2.15446	0.273445
MSANTD2	ENSG00000120458.10	protein_coding	KNOWN	2.31022	-0.256031
MSI2	ENSG00000153944.10	protein_coding	KNOWN	3.35835	-0.278369
MSRB1	ENSG00000198736.11	protein_coding	KNOWN	2.79519	1.67514
MSRB3	ENSG00000174099.10	protein_coding	KNOWN	4.63203	0.677807
MT-CO3	ENSG00000198938.2	protein_coding	KNOWN	2.23304	-0.864816
MT2A	ENSG00000125148.6	protein_coding	KNOWN	4.74967	-0.706372
MTAP	ENSG00000099810.18	protein_coding	KNOWN	3.44442	0.575295
MTFR2	ENSG00000146410.11	protein_coding	KNOWN	4.11929	0.0602389
MTHFSD	ENSG00000103248.18	protein_coding	KNOWN	3.23009	0.377146
MVB12A	ENSG00000141971.12	protein_coding	KNOWN	2.78681	1.10101
MXD3	ENSG00000213347.10	protein_coding	KNOWN	4.74952	2.23871
MYADM	ENSG00000179820.15	protein_coding	KNOWN	2.41066	1.00521
MYBL2	ENSG00000101057.15	protein_coding	KNOWN	4.70677	-0.309794
MYCL	ENSG00000116990.10	protein_coding	KNOWN	3.83561	2.51954
MYH11	ENSG00000133392.16	protein_coding	KNOWN	2.84282	-1.14678
MYL12A	ENSG00000101608.12	protein_coding	KNOWN	3.86325	0.567892
MYO10	ENSG00000145555.14	protein_coding	KNOWN	3.77374	-0.970763
MYO1B	ENSG00000128641.18	protein_coding	KNOWN	2.18965	-0.361987
MYO1E	ENSG00000157483.8	protein_coding	KNOWN	3.20684	0.255356
MYO3A	ENSG00000095777.14	protein_coding	KNOWN	5.30503	0.0921255
MZT1	ENSG00000204899.5	protein_coding	KNOWN	2.26165	0.0211555
NAALADL2	ENSG00000177694.14	protein_coding	KNOWN	2.19125	1.0311
NACC2	ENSG00000148411.7	protein_coding	KNOWN	2.80393	1.0984
NAP1L1	ENSG00000187109.13	protein_coding	KNOWN	3.72865	-0.515026
NAPEPLD	ENSG00000161048.11	protein_coding	KNOWN	2.17301	0.773892
NASP	ENSG00000132780.16	protein_coding	KNOWN	6.52487	2.33438
NCALD	ENSG00000104490.17	protein_coding	KNOWN	2.80447	0.651306
NCAPD2	ENSG00000010292.12	protein_coding	KNOWN	5.13643	-0.779676
NCAPG	ENSG00000109805.9	protein_coding	KNOWN	4.96517	-0.204613
NCAPH	ENSG00000121152.9	protein_coding	KNOWN	3.38629	-0.285206
NCL	ENSG00000115053.15	protein_coding	KNOWN	2.20591	0.561591
NDC1	ENSG00000058804.11	protein_coding	KNOWN	2.14993	0.117612
NDC80	ENSG00000080986.12	protein_coding	KNOWN	7.13728	0.802164
NDE1	ENSG00000072864.12	protein_coding	KNOWN	5.42674	0.475165
NEDD1	ENSG00000139350.11	protein_coding	KNOWN	5.34106	0.0787572
NEDD4	ENSG00000069869.15	protein_coding	KNOWN	3.65829	-0.163648
NEDD9	ENSG00000111859.16	protein_coding	KNOWN	5.10951	-2.49776
NEIL3	ENSG00000109674.3	protein_coding	KNOWN	4.6377	-0.184421
NEK2	ENSG00000117650.12	protein_coding	KNOWN	4.21799	-0.960433
NEMP1	ENSG00000166881.9	protein_coding	KNOWN	5.50543	1.3537
NENF	ENSG00000117691.9	protein_coding	KNOWN	2.44548	-0.548716
NES	ENSG00000132688.10	protein_coding	KNOWN	3.95184	-0.323308
NFATC4	ENSG00000100968.13	protein_coding	KNOWN	3.2908	-0.338407
NGLY1	ENSG00000151092.16	protein_coding	KNOWN	3.33243	-0.373108
NHLRC2	ENSG00000196865.4	protein_coding	KNOWN	2.78028	2.81829
NINJ1	ENSG00000131669.9	protein_coding	KNOWN	4.16333	-1.0686
NKAIN3	ENSG00000185942.11	protein_coding	KNOWN	2.21964	0.515315
NOC3L	ENSG00000173145.11	protein_coding	KNOWN	2.60321	1.38943
NOM1	ENSG00000146909.7	protein_coding	KNOWN	2.20221	0.636
NOP9	ENSG00000196943.12	protein_coding	KNOWN	2.23548	2.1685
NOS1AP	ENSG00000198929.12	protein_coding	KNOWN	3.70518	0.272665
NOSTRIN	ENSG00000163072.14	protein_coding	KNOWN	3.98598	-1.75988
NOTCH1	ENSG00000148400.9	protein_coding	KNOWN	3.81507	1.69185
NOTCH3	ENSG00000074181.8	protein_coding	KNOWN	6.69454	0.768444
NPAS3	ENSG00000151322.18	protein_coding	KNOWN	2.43602	1.1476
NPC2	ENSG00000119655.8	protein_coding	KNOWN	3.63353	0.527139
NPHP3	ENSG00000113971.18	protein_coding	KNOWN	3.67245	1.70119
NPM1	ENSG00000181163.13	protein_coding	KNOWN	2.6542	-2.31204
NR1D2	ENSG00000174738.12	protein_coding	KNOWN	2.12855	2.85503
NR2E1	ENSG00000112333.11	protein_coding	KNOWN	4.41799	-0.0879069
NRF1	ENSG00000106459.14	protein_coding	KNOWN	2.07409	2.06005
NSRP1	ENSG00000126653.15	protein_coding	KNOWN	2.33216	-0.344895
NT5C	ENSG00000125458.6	protein_coding	KNOWN	2.63474	0.849569
NT5DC4	ENSG00000144130.11	protein_coding	KNOWN	2.11426	1.94973
NUAK2	ENSG00000163545.8	protein_coding	KNOWN	2.75664	0.157779
NUCKS1	ENSG00000069275.12	protein_coding	KNOWN	3.01006	-0.740428
NUDCD2	ENSG00000170584.10	protein_coding	KNOWN	2.98244	1.31467
NUDT13	ENSG00000166321.13	protein_coding	KNOWN	2.21145	1.63613
NUF2	ENSG00000143228.12	protein_coding	KNOWN	5.63758	-1.78669
NUMA1	ENSG00000137497.17	protein_coding	KNOWN	2.00064	0.301721
NUP107	ENSG00000111581.9	protein_coding	KNOWN	2.15874	0.742197
NUP35	ENSG00000163002.12	protein_coding	KNOWN	3.07957	0.765028
NUP37	ENSG00000075188.8	protein_coding	KNOWN	3.92238	1.1817
NUP43	ENSG00000120253.13	protein_coding	KNOWN	4.73488	1.88504
NUP62	ENSG00000213024.11	protein_coding	KNOWN	3.04953	1.39237
NUP98	ENSG00000110713.15	protein_coding	KNOWN	2.32641	-0.288712
NUSAP1	ENSG00000137804.12	protein_coding	KNOWN	7.16081	-1.89196
NXN	ENSG00000167693.16	protein_coding	KNOWN	3.62284	2.52002
OAF	ENSG00000184232.8	protein_coding	KNOWN	3.02417	2.49364
OBFC1	ENSG00000107960.10	protein_coding	KNOWN	5.58982	1.68748
ODF2	ENSG00000136811.16	protein_coding	KNOWN	3.97632	1.14863
OIP5	ENSG00000104147.8	protein_coding	KNOWN	2.89597	-0.83472
OLFM3	ENSG00000118733.16	protein_coding	KNOWN	2.55606	1.84789
ORAI1	ENSG00000276045.1	protein_coding	KNOWN	2.28629	2.06434
ORC1	ENSG00000085840.12	protein_coding	KNOWN	3.8231	0.336014
ORC6	ENSG00000091651.8	protein_coding	KNOWN	5.08724	-0.0476539
OSBPL1A	ENSG00000141447.16	protein_coding	KNOWN	2.83081	0.474977
OSER1	ENSG00000132823.10	protein_coding	KNOWN	2.19919	0
OSTC	ENSG00000198856.12	protein_coding	KNOWN	2.10115	-0.202299
P4HA1	ENSG00000122884.12	protein_coding	KNOWN	2.07889	0.0444089
PAICS	ENSG00000128050.8	protein_coding	KNOWN	3.91956	-2.65652
PALD1	ENSG00000107719.8	protein_coding	KNOWN	2.40533	0.905735
PALLD	ENSG00000129116.17	protein_coding	KNOWN	3.76983	0.366021
PAPD7	ENSG00000112941.13	protein_coding	KNOWN	2.51896	0.649167
PARD3	ENSG00000148498.15	protein_coding	KNOWN	5.87894	0.947168
PARD3B	ENSG00000116117.17	protein_coding	KNOWN	2.06526	-0.900628
PARP1	ENSG00000143799.12	protein_coding	KNOWN	2.49337	-0.0351445
PARP14	ENSG00000173193.13	protein_coding	KNOWN	2.47182	-0.889465
PARP4	ENSG00000102699.5	protein_coding	KNOWN	2.66989	0.396936
PARP9	ENSG00000138496.16	protein_coding	KNOWN	3.55054	2.9445
PARPBP	ENSG00000185480.11	protein_coding	KNOWN	3.91345	-0.376973
PASK	ENSG00000115687.13	protein_coding	KNOWN	3.39069	-0.35638
PAWR	ENSG00000177425.10	protein_coding	KNOWN	2.25719	1.27613
PBK	ENSG00000168078.9	protein_coding	KNOWN	7.16081	0
PBX3	ENSG00000167081.16	protein_coding	KNOWN	4.25294	-0.280024
PBXIP1	ENSG00000163346.16	protein_coding	KNOWN	3.97304	2.01529
PCBD1	ENSG00000166228.8	protein_coding	KNOWN	2.00516	0.795322
PCBD2	ENSG00000132570.14	protein_coding	KNOWN	2.78122	1.48076
PCDH18	ENSG00000189184.11	protein_coding	KNOWN	4.45462	0.068216
PCDHB4	ENSG00000081818.3	protein_coding	KNOWN	2.40233	2.62502
PCGF5	ENSG00000180628.14	protein_coding	KNOWN	3.31734	-0.453926
PDCD4	ENSG00000150593.15	protein_coding	KNOWN	2.36404	0.208387
PDE8A	ENSG00000073417.14	protein_coding	KNOWN	3.28977	2.0374
PDE8B	ENSG00000113231.13	protein_coding	KNOWN	2.33439	0.676057
PDGFD	ENSG00000170962.12	protein_coding	KNOWN	4.02795	-1.71972
PDIA3	ENSG00000167004.12	protein_coding	KNOWN	3.03705	-0.387516
PDIA6	ENSG00000143870.12	protein_coding	KNOWN	3.19404	-1.866
PDLIM1	ENSG00000107438.8	protein_coding	KNOWN	3.1069	1.13458
PDLIM3	ENSG00000154553.13	protein_coding	KNOWN	4.91168	-1.34292
PDLIM5	ENSG00000163110.14	protein_coding	KNOWN	2.35884	0.515617
PDLIM7	ENSG00000196923.13	protein_coding	KNOWN	2.24921	1.19386
PDSS1	ENSG00000148459.15	protein_coding	KNOWN	2.15967	2.03866
PEA15	ENSG00000162734.12	protein_coding	KNOWN	2.32799	-1.85556
PER3	ENSG00000049246.14	protein_coding	KNOWN	2.28299	-2.50457
PEX11A	ENSG00000166821.8	protein_coding	KNOWN	3.45005	0.934122
PEX19	ENSG00000162735.18	protein_coding	KNOWN	2.55998	-0.457856
PEX2	ENSG00000164751.14	protein_coding	KNOWN	4.00939	-1.17546
PGM1	ENSG00000079739.15	protein_coding	KNOWN	4.32379	1.29598
PHF11	ENSG00000136147.16	protein_coding	KNOWN	2.24055	2.52731
PHF7	ENSG00000010318.19	protein_coding	KNOWN	2.85092	1.98087
PHGDH	ENSG00000092621.11	protein_coding	KNOWN	6.20504	1.44034
PHIP	ENSG00000146247.13	protein_coding	KNOWN	3.88809	-1.03363
PHLDA1	ENSG00000139289.13	protein_coding	KNOWN	2.48489	1.73199
PHLPP1	ENSG00000081913.13	protein_coding	KNOWN	4.63716	0.832397
PID1	ENSG00000153823.18	protein_coding	KNOWN	2.30423	1.54464
PIEZO2	ENSG00000154864.11	protein_coding	KNOWN	5.02955	-0.842847
PIF1	ENSG00000140451.12	protein_coding	KNOWN	3.58492	0.0865773
PIGA	ENSG00000165195.14	protein_coding	KNOWN	2.06855	1.61337
PIGB	ENSG00000069943.9	protein_coding	KNOWN	2.15253	0.136426
PIGM	ENSG00000143315.6	protein_coding	KNOWN	2.1488	0.146075
PIGQ	ENSG00000007541.15	protein_coding	KNOWN	2.76054	1.95142
PIGW	ENSG00000277161.1	protein_coding	KNOWN	2.16842	0.498354
PIM1	ENSG00000137193.13	protein_coding	KNOWN	2.78065	0.394636
PIPOX	ENSG00000179761.11	protein_coding	KNOWN	2.75943	0.230648
PIR	ENSG00000087842.10	protein_coding	KNOWN	2.71282	0.906318
PKM	ENSG00000067225.17	protein_coding	KNOWN	3.29741	0.96943
PKN3	ENSG00000160447.6	protein_coding	KNOWN	4.38889	-0.161009
PLAG1	ENSG00000181690.7	protein_coding	KNOWN	3.16135	0.55957
PLAGL1	ENSG00000118495.18	protein_coding	KNOWN	3.06847	1.10975
PLCE1	ENSG00000138193.14	protein_coding	KNOWN	2.14255	-1.36314
PLCH1	ENSG00000114805.16	protein_coding	KNOWN	2.85315	0
PLEKHB1	ENSG00000021300.13	protein_coding	KNOWN	2.75206	2.27001
PLEKHG1	ENSG00000120278.14	protein_coding	KNOWN	4.72601	0.0571233
PLEKHG4B	ENSG00000153404.13	protein_coding	KNOWN	4.66674	0.544345
PLEKHO2	ENSG00000241839.9	protein_coding	KNOWN	3.84018	2.46332
PLIN3	ENSG00000105355.8	protein_coding	KNOWN	2.82327	0.757352
PLIN5	ENSG00000214456.8	protein_coding	KNOWN	2.2844	1.09634
PLK1	ENSG00000166851.14	protein_coding	KNOWN	4.24954	0.616358
PLK4	ENSG00000142731.10	protein_coding	KNOWN	5.14374	0.129387
PLOD2	ENSG00000152952.11	protein_coding	KNOWN	2.67431	-0.025506
PLOD3	ENSG00000106397.11	protein_coding	KNOWN	2.14199	1.42898
PLP2	ENSG00000102007.10	protein_coding	KNOWN	2.89836	2.49324
PLPP3	ENSG00000162407.8	protein_coding	KNOWN	5.14978	-0.136627
PLS1	ENSG00000120756.12	protein_coding	KNOWN	2.30303	-0.139964
PLSCR1	ENSG00000188313.12	protein_coding	KNOWN	6.0861	1.78527
PM20D2	ENSG00000146281.5	protein_coding	KNOWN	2.00504	0.808616
PMF1	ENSG00000160783.19	protein_coding	KNOWN	2.19168	0.983739
PMP2	ENSG00000147588.6	protein_coding	KNOWN	3.17915	0.370814
PMP22	ENSG00000109099.13	protein_coding	KNOWN	2.0293	-0.896547
PNRC2	ENSG00000189266.11	protein_coding	KNOWN	2.17721	0
POC1A	ENSG00000164087.7	protein_coding	KNOWN	3.14821	1.7195
POLA1	ENSG00000101868.10	protein_coding	KNOWN	4.12377	2.0173
POLA2	ENSG00000014138.8	protein_coding	KNOWN	4.93775	0.686337
POLD2	ENSG00000106628.10	protein_coding	KNOWN	2.10847	-0.00100221
POLD3	ENSG00000077514.8	protein_coding	KNOWN	2.69134	0.534756
POLE2	ENSG00000100479.12	protein_coding	KNOWN	3.60605	-0.0402343
POLQ	ENSG00000051341.13	protein_coding	KNOWN	5.52652	-0.76448
POLR2D	ENSG00000144231.10	protein_coding	KNOWN	2.16703	-2.35777
POLR3D	ENSG00000168495.12	protein_coding	KNOWN	3.35862	0.957684
PON2	ENSG00000105854.12	protein_coding	KNOWN	6.97687	-0.647609
POU3F2	ENSG00000184486.8	protein_coding	KNOWN	2.30213	-1.4371
POU3F4	ENSG00000196767.6	protein_coding	KNOWN	4.22169	1.00024
PPA2	ENSG00000138777.19	protein_coding	KNOWN	2.10373	1.15252
PPARA	ENSG00000186951.16	protein_coding	KNOWN	3.566	0.920075
PPARGC1A	ENSG00000109819.8	protein_coding	KNOWN	2.36307	0.109813
PPIA	ENSG00000196262.13	protein_coding	KNOWN	3.11161	0.835714
PPIF	ENSG00000108179.13	protein_coding	KNOWN	2.00454	1.0485
PPP1R12A	ENSG00000058272.16	protein_coding	KNOWN	2.03214	0.19644
PPT1	ENSG00000131238.16	protein_coding	KNOWN	2.23677	-0.110769
PPT2	ENSG00000221988.12	protein_coding	KNOWN	2.11349	-0.677502
PRC1	ENSG00000198901.13	protein_coding	KNOWN	6.00847	0.178362
PRDM16	ENSG00000142611.16	protein_coding	KNOWN	4.74363	-0.184495
PRELID2	ENSG00000186314.11	protein_coding	KNOWN	4.42447	1.92628
PREX2	ENSG00000046889.18	protein_coding	KNOWN	6.16626	0
PRIM1	ENSG00000198056.13	protein_coding	KNOWN	4.0961	-0.302412
PRKAA1	ENSG00000132356.11	protein_coding	KNOWN	2.08494	1.64965
PRKRA	ENSG00000180228.12	protein_coding	KNOWN	2.26439	1.5112
PRMT5	ENSG00000100462.15	protein_coding	KNOWN	3.27527	1.89986
PROSER3	ENSG00000167595.14	protein_coding	KNOWN	2.84832	1.2626
PRPF38A	ENSG00000134748.12	protein_coding	KNOWN	2.32197	0
PRPS2	ENSG00000101911.12	protein_coding	KNOWN	3.72512	2.1359
PRR11	ENSG00000068489.12	protein_coding	KNOWN	5.70284	0.536693
PRTFDC1	ENSG00000099256.18	protein_coding	KNOWN	3.1214	-2.60813
PSAT1	ENSG00000135069.13	protein_coding	KNOWN	4.92577	-0.471261
PSMC3	ENSG00000165916.8	protein_coding	KNOWN	2.21094	0.735646
PSME1	ENSG00000092010.14	protein_coding	KNOWN	2.67349	1.14016
PSME2	ENSG00000100911.13	protein_coding	KNOWN	3.19498	0.18235
PSRC1	ENSG00000134222.16	protein_coding	KNOWN	5.03748	0.852243
PSTPIP2	ENSG00000152229.18	protein_coding	KNOWN	3.44139	1.09478
PTAR1	ENSG00000188647.12	protein_coding	KNOWN	3.10637	0.36793
PTBP1	ENSG00000011304.17	protein_coding	KNOWN	4.20851	2.6167
PTN	ENSG00000105894.11	protein_coding	KNOWN	6.26821	-0.955454
PTPN13	ENSG00000163629.12	protein_coding	KNOWN	5.61986	0.789177
PTTG1	ENSG00000164611.12	protein_coding	KNOWN	7.16071	-0.290154
PTX3	ENSG00000163661.3	protein_coding	KNOWN	3.67521	1.36437
PUF60	ENSG00000179950.13	protein_coding	KNOWN	2.53941	2.42814
PVRL3	ENSG00000177707.10	protein_coding	KNOWN	4.72388	0.540419
RAB13	ENSG00000143545.8	protein_coding	KNOWN	2.47178	-1.57897
RAB23	ENSG00000112210.11	protein_coding	KNOWN	3.01423	0.662882
RAB27B	ENSG00000041353.9	protein_coding	KNOWN	2.28121	1.64537
RAB29	ENSG00000117280.12	protein_coding	KNOWN	3.45857	0.178018
RAB34	ENSG00000109113.17	protein_coding	KNOWN	2.50012	1.65301
RAB8B	ENSG00000166128.12	protein_coding	KNOWN	3.00308	0.225242
RACGAP1	ENSG00000161800.12	protein_coding	KNOWN	5.92666	0.404932
RAD21	ENSG00000164754.12	protein_coding	KNOWN	3.23432	-2.54775
RAD51AP1	ENSG00000111247.14	protein_coding	KNOWN	5.49204	-0.862433
RAD51B	ENSG00000182185.18	protein_coding	KNOWN	2.53786	-1.0538
RAD54L	ENSG00000085999.11	protein_coding	KNOWN	2.62823	0.575564
RAN	ENSG00000132341.11	protein_coding	KNOWN	3.02535	0.367748
RAP1B	ENSG00000127314.17	protein_coding	KNOWN	2.5866	-1.71062
RAP2C	ENSG00000123728.9	protein_coding	KNOWN	2.37092	2.64421
RASSF8	ENSG00000123094.15	protein_coding	KNOWN	2.34348	0.647251
RBBP7	ENSG00000102054.17	protein_coding	KNOWN	2.61591	1.81226
RBBP8	ENSG00000101773.16	protein_coding	KNOWN	4.17493	0.769498
RBL1	ENSG00000080839.11	protein_coding	KNOWN	3.38585	1.72466
RBM14	ENSG00000239306.4	protein_coding	KNOWN	2.56385	0.952025
RBM15	ENSG00000162775.14	protein_coding	KNOWN	2.30561	-0.85414
RBM23	ENSG00000100461.17	protein_coding	KNOWN	3.45366	1.85202
RBM28	ENSG00000106344.8	protein_coding	KNOWN	2.00405	0.336624
RBPMS2	ENSG00000166831.8	protein_coding	KNOWN	2.80667	1.18946
RCC1	ENSG00000180198.15	protein_coding	KNOWN	2.1446	0.515145
RCE1	ENSG00000173653.7	protein_coding	KNOWN	2.29132	2.04959
RCN1	ENSG00000049449.8	protein_coding	KNOWN	4.4746	-1.33723
RDX	ENSG00000137710.14	protein_coding	KNOWN	3.7369	-0.977645
RECK	ENSG00000122707.11	protein_coding	KNOWN	3.77123	0.565197
RELT	ENSG00000054967.12	protein_coding	KNOWN	2.49983	1.96105
REST	ENSG00000084093.15	protein_coding	KNOWN	4.58512	0.146739
RFC1	ENSG00000035928.14	protein_coding	KNOWN	2.27564	0.775503
RFC2	ENSG00000049541.10	protein_coding	KNOWN	1.99091	0.0557994
RFC3	ENSG00000133119.12	protein_coding	KNOWN	3.89775	1.60873
RFC4	ENSG00000163918.10	protein_coding	KNOWN	2.98331	-1.46599
RFC5	ENSG00000111445.13	protein_coding	KNOWN	3.66067	1.70599
RFFL	ENSG00000092871.16	protein_coding	KNOWN	2.55918	1.99721
RFWD3	ENSG00000168411.13	protein_coding	KNOWN	2.52247	-0.648105
RFX4	ENSG00000111783.12	protein_coding	KNOWN	5.13889	-0.54823
RGS20	ENSG00000147509.13	protein_coding	KNOWN	2.85148	0.63999
RHBDD1	ENSG00000144468.16	protein_coding	KNOWN	2.63792	0.542154
RHNO1	ENSG00000171792.10	protein_coding	KNOWN	2.62862	0.60849
RHOA	ENSG00000067560.10	protein_coding	KNOWN	4.11787	-0.313563
RHOC	ENSG00000155366.16	protein_coding	KNOWN	2.43663	-1.17319
RHOJ	ENSG00000126785.12	protein_coding	KNOWN	4.05179	0
RIF1	ENSG00000080345.17	protein_coding	KNOWN	2.60062	-0.17245
RITA1	ENSG00000139405.15	protein_coding	KNOWN	3.03885	1.21139
RMI1	ENSG00000178966.15	protein_coding	KNOWN	2.5875	0.437585
RMI2	ENSG00000175643.8	protein_coding	KNOWN	4.86564	-0.346905
RNASEH2A	ENSG00000104889.4	protein_coding	KNOWN	3.47108	2.44004
RND3	ENSG00000115963.13	protein_coding	KNOWN	2.66757	0.147085
RNF175	ENSG00000145428.14	protein_coding	KNOWN	2.09465	0.733486
RNF217	ENSG00000146373.16	protein_coding	KNOWN	3.59027	2.75576
RNF26	ENSG00000173456.4	protein_coding	KNOWN	2.18567	1.48897
ROR1	ENSG00000185483.11	protein_coding	KNOWN	2.35636	0.0566563
RPA1	ENSG00000132383.11	protein_coding	KNOWN	5.29437	-0.424988
RPA2	ENSG00000117748.9	protein_coding	KNOWN	2.59022	0.719343
RPA3	ENSG00000106399.11	protein_coding	KNOWN	2.6889	0.897934
RPL22L1	ENSG00000163584.17	protein_coding	KNOWN	5.10259	0.771064
RPL4	ENSG00000174444.14	protein_coding	KNOWN	3.67191	1.5749
RPL8	ENSG00000161016.15	protein_coding	KNOWN	2.36882	1.07558
RPLP0	ENSG00000089157.15	protein_coding	KNOWN	5.14337	2.69092
RPP25L	ENSG00000164967.9	protein_coding	KNOWN	2.30538	-1.51479
RPP40	ENSG00000124787.13	protein_coding	KNOWN	2.38933	-0.350276
RPS14	ENSG00000164587.11	protein_coding	KNOWN	2.56859	0.393152
RPS19	ENSG00000105372.6	protein_coding	KNOWN	2.92106	1.90617
RPS27A	ENSG00000143947.12	protein_coding	KNOWN	2.22197	-0.11146
RPS27L	ENSG00000185088.13	protein_coding	KNOWN	4.1158	-0.66007
RPS3	ENSG00000149273.14	protein_coding	KNOWN	3.25597	0.255881
RPS6	ENSG00000137154.12	protein_coding	KNOWN	6.3581	-0.584069
RPSA	ENSG00000168028.13	protein_coding	KNOWN	2.03105	-1.03419
RREB1	ENSG00000124782.19	protein_coding	KNOWN	5.02553	1.20922
RRM1	ENSG00000167325.14	protein_coding	KNOWN	2.62893	-0.638431
RRS1	ENSG00000179041.3	protein_coding	KNOWN	2.37458	0.919874
RTCB	ENSG00000100220.11	protein_coding	KNOWN	4.26304	1.33651
RTKN2	ENSG00000182010.10	protein_coding	KNOWN	6.6816	1.76265
RTN4R	ENSG00000040608.13	protein_coding	KNOWN	2.69438	2.21718
S100A6	ENSG00000197956.9	protein_coding	KNOWN	2.40689	-0.888165
S1PR1	ENSG00000170989.8	protein_coding	KNOWN	7.12647	1.0068
SALL1	ENSG00000103449.11	protein_coding	KNOWN	4.98874	-0.49633
SAMD13	ENSG00000203943.8	protein_coding	KNOWN	3.53319	2.61005
SAMD4A	ENSG00000020577.13	protein_coding	KNOWN	3.72424	-2.08774
SAP30	ENSG00000164105.3	protein_coding	KNOWN	2.43597	0.0734694
SAPCD2	ENSG00000186193.8	protein_coding	KNOWN	2.85207	-1.4432
SASH1	ENSG00000111961.16	protein_coding	KNOWN	2.04011	1.70517
SAV1	ENSG00000151748.14	protein_coding	KNOWN	2.7035	1.67568
SCAF11	ENSG00000139218.17	protein_coding	KNOWN	3.8282	-1.33871
SCARA3	ENSG00000168077.13	protein_coding	KNOWN	2.91438	-0.0122678
SCCPDH	ENSG00000143653.9	protein_coding	KNOWN	2.53342	0.369759
SCD	ENSG00000099194.5	protein_coding	KNOWN	3.14807	-0.85374
SCML2	ENSG00000102098.17	protein_coding	KNOWN	2.76545	2.3301
SDC2	ENSG00000169439.11	protein_coding	KNOWN	2.17618	0.327802
SDCBP	ENSG00000137575.11	protein_coding	KNOWN	2.4209	-0.000208333
SDE2	ENSG00000143751.9	protein_coding	KNOWN	2.25477	0.900051
SEC24B	ENSG00000138802.11	protein_coding	KNOWN	1.99241	-0.699073
2016-09-11	ENSG00000138758.11	protein_coding	KNOWN	1.98268	-2.78802
2016-09-02	ENSG00000168385.17	protein_coding	KNOWN	3.71317	0.340855
SERPINB6	ENSG00000124570.17	protein_coding	KNOWN	2.97298	-0.739713
SERPING1	ENSG00000149131.15	protein_coding	KNOWN	2.91911	0.198863
SERPINH1	ENSG00000149257.13	protein_coding	KNOWN	2.64015	-0.516468
SERTAD3	ENSG00000167565.12	protein_coding	KNOWN	3.7082	-1.17523
SET	ENSG00000119335.16	protein_coding	KNOWN	2.54238	0.319654
SETD9	ENSG00000155542.11	protein_coding	KNOWN	2.01826	0.897285
SFRP1	ENSG00000104332.11	protein_coding	KNOWN	7.16081	-0.213142
SFRP2	ENSG00000145423.4	protein_coding	KNOWN	4.47973	0.625515
SFT2D2	ENSG00000213064.9	protein_coding	KNOWN	2.01543	2.22332
SGCE	ENSG00000127990.15	protein_coding	KNOWN	2.78749	1.63891
SGK223	ENSG00000275342.4	protein_coding	KNOWN	2.1061	1.69422
SGOL1	ENSG00000129810.14	protein_coding	KNOWN	5.45576	-0.367426
SGOL2	ENSG00000163535.17	protein_coding	KNOWN	6.41415	0.165744
SGPP1	ENSG00000126821.7	protein_coding	KNOWN	2.37631	-0.351777
SGSH	ENSG00000181523.12	protein_coding	KNOWN	3.07436	1.76829
SH3BGRL	ENSG00000131171.12	protein_coding	KNOWN	3.98566	1.17784
SH3BP5L	ENSG00000175137.10	protein_coding	KNOWN	3.21367	2.25406
SH3RF1	ENSG00000154447.14	protein_coding	KNOWN	3.5888	1.3021
SHC1	ENSG00000160691.18	protein_coding	KNOWN	2.17033	0.299116
SHCBP1	ENSG00000171241.8	protein_coding	KNOWN	5.73357	-0.309371
SHMT1	ENSG00000176974.17	protein_coding	KNOWN	2.43135	0.601585
SHMT2	ENSG00000182199.10	protein_coding	KNOWN	2.77022	1.16612
SHROOM3	ENSG00000138771.14	protein_coding	KNOWN	4.35767	-0.830084
SIK2	ENSG00000170145.4	protein_coding	KNOWN	3.17841	1.49163
SIVA1	ENSG00000184990.12	protein_coding	KNOWN	2.83592	2.04607
SKA1	ENSG00000154839.9	protein_coding	KNOWN	5.85438	-2.2973
SKA3	ENSG00000165480.15	protein_coding	KNOWN	4.63731	-1.26523
SKIV2L	ENSG00000204351.11	protein_coding	KNOWN	3.04844	0.492577
SKP2	ENSG00000145604.15	protein_coding	KNOWN	3.25214	-1.02269
SLAIN1	ENSG00000139737.21	protein_coding	KNOWN	2.20875	0.514235
SLC12A2	ENSG00000064651.13	protein_coding	KNOWN	1.99464	0.738088
SLC12A4	ENSG00000124067.16	protein_coding	KNOWN	2.01616	1.46363
SLC16A1	ENSG00000155380.11	protein_coding	KNOWN	3.51708	0.184343
SLC1A3	ENSG00000079215.13	protein_coding	KNOWN	7.16057	0.120913
SLC1A5	ENSG00000105281.12	protein_coding	KNOWN	2.30977	0.711796
SLC25A13	ENSG00000004864.13	protein_coding	KNOWN	4.27453	1.80299
SLC25A15	ENSG00000102743.14	protein_coding	KNOWN	2.0601	0.181434
SLC25A24	ENSG00000085491.15	protein_coding	KNOWN	1.99452	0.352851
SLC25A37	ENSG00000147454.13	protein_coding	KNOWN	2.65975	0.660649
SLC26A2	ENSG00000155850.7	protein_coding	KNOWN	2.85116	0.0216484
SLC29A1	ENSG00000112759.16	protein_coding	KNOWN	5.19919	0.248539
SLC2A8	ENSG00000136856.17	protein_coding	KNOWN	3.04841	2.00961
SLC35A2	ENSG00000102100.15	protein_coding	KNOWN	2.31658	2.20755
SLC39A1	ENSG00000143570.17	protein_coding	KNOWN	4.51925	1.50764
SLC40A1	ENSG00000138449.10	protein_coding	KNOWN	2.31964	-0.442753
SLC6A9	ENSG00000196517.11	protein_coding	KNOWN	5.15876	1.30849
SLC7A1	ENSG00000139514.12	protein_coding	KNOWN	3.18362	-0.11228
SLC7A3	ENSG00000165349.11	protein_coding	KNOWN	3.65836	1.39371
SLC7A6OS	ENSG00000103061.11	protein_coding	KNOWN	2.00629	1.7496
SLF2	ENSG00000119906.11	protein_coding	KNOWN	2.10967	0.852331
SMC2	ENSG00000136824.18	protein_coding	KNOWN	6.91759	-1.54555
SMC4	ENSG00000113810.15	protein_coding	KNOWN	6.53529	-0.566682
SMC5	ENSG00000198887.8	protein_coding	KNOWN	2.40608	1.38071
SMIM20	ENSG00000250317.8	protein_coding	KNOWN	2.03257	1.56122
SMO	ENSG00000128602.9	protein_coding	KNOWN	4.01428	-1.7644
SNAPC1	ENSG00000023608.4	protein_coding	KNOWN	2.70466	-0.168516
SNRPA	ENSG00000077312.8	protein_coding	KNOWN	2.58745	2.30525
SNRPB	ENSG00000125835.17	protein_coding	KNOWN	2.32912	2.66792
SNRPD1	ENSG00000167088.10	protein_coding	KNOWN	2.14036	-0.982952
SNRPG	ENSG00000143977.13	protein_coding	KNOWN	2.05484	-1.48635
SNTB2	ENSG00000168807.16	protein_coding	KNOWN	2.70785	0.843949
SNX1	ENSG00000028528.14	protein_coding	KNOWN	2.2817	2.63976
SNX11	ENSG00000002919.14	protein_coding	KNOWN	2.06395	0.600038
SNX5	ENSG00000089006.16	protein_coding	KNOWN	3.23958	-0.399569
SNX7	ENSG00000162627.16	protein_coding	KNOWN	2.18565	0.685044
SOAT1	ENSG00000057252.12	protein_coding	KNOWN	3.41904	0.292549
SORBS3	ENSG00000120896.13	protein_coding	KNOWN	2.40502	0.333564
SOX2	ENSG00000181449.3	protein_coding	KNOWN	5.40974	-0.489603
SOX6	ENSG00000110693.15	protein_coding	KNOWN	6.73131	-1.19559
SP1	ENSG00000185591.9	protein_coding	KNOWN	3.57333	1.91287
SP2	ENSG00000167182.12	protein_coding	KNOWN	2.11357	0.204719
SP8	ENSG00000164651.16	protein_coding	KNOWN	3.99074	-0.61197
SPA17	ENSG00000064199.6	protein_coding	KNOWN	2.22393	2.64618
SPARC	ENSG00000113140.10	protein_coding	KNOWN	5.21545	-0.951698
SPATA5	ENSG00000145375.7	protein_coding	KNOWN	3.06863	0.118003
SPATA6	ENSG00000132122.11	protein_coding	KNOWN	3.55556	0.784234
SPATS2L	ENSG00000196141.12	protein_coding	KNOWN	2.5041	0.527509
SPC24	ENSG00000161888.11	protein_coding	KNOWN	5.91976	0.0419062
SPC25	ENSG00000152253.8	protein_coding	KNOWN	5.52124	-0.0844525
SPG20	ENSG00000133104.12	protein_coding	KNOWN	2.73761	-0.0384097
SPICE1	ENSG00000163611.11	protein_coding	KNOWN	2.88817	0.979819
SPPL2A	ENSG00000138600.9	protein_coding	KNOWN	2.58871	0.784477
SPRY1	ENSG00000164056.10	protein_coding	KNOWN	2.1985	-1.51429
SPSB4	ENSG00000175093.4	protein_coding	KNOWN	2.34101	0.214448
SRI	ENSG00000075142.13	protein_coding	KNOWN	2.80099	1.02741
SRSF10	ENSG00000188529.14	protein_coding	KNOWN	2.02771	-0.0144826
SRSF3	ENSG00000112081.16	protein_coding	KNOWN	2.08198	-1.37236
SRSF4	ENSG00000116350.16	protein_coding	KNOWN	2.01067	1.63631
ST6GALNAC5	ENSG00000117069.14	protein_coding	KNOWN	2.15361	0.780366
STAG1	ENSG00000118007.12	protein_coding	KNOWN	2.29248	-0.0376585
STAG2	ENSG00000101972.18	protein_coding	KNOWN	2.02869	0.0460382
STIL	ENSG00000123473.15	protein_coding	KNOWN	2.75905	-0.662896
STK11IP	ENSG00000144589.20	protein_coding	KNOWN	2.76418	2.27819
STK17B	ENSG00000081320.10	protein_coding	KNOWN	2.66042	0.893648
STK26	ENSG00000134602.15	protein_coding	KNOWN	5.49499	-2.0476
STK3	ENSG00000104375.15	protein_coding	KNOWN	4.14417	-0.548512
STK32C	ENSG00000165752.16	protein_coding	KNOWN	2.60062	2.38925
STK39	ENSG00000198648.10	protein_coding	KNOWN	2.59376	1.66966
STOX1	ENSG00000165730.14	protein_coding	KNOWN	6.65535	2.02147
STX10	ENSG00000104915.14	protein_coding	KNOWN	2.42456	0.691558
STXBP4	ENSG00000166263.13	protein_coding	KNOWN	2.64545	-2.35123
STXBP6	ENSG00000168952.15	protein_coding	KNOWN	4.72203	2.20104
SUV39H2	ENSG00000152455.15	protein_coding	KNOWN	4.11889	0.113319
SVIL	ENSG00000197321.14	protein_coding	KNOWN	3.45442	-1.13888
SYNE2	ENSG00000054654.15	protein_coding	KNOWN	7.16081	1.62645
SYPL1	ENSG00000008282.8	protein_coding	KNOWN	3.59597	-1.17333
SYT17	ENSG00000103528.16	protein_coding	KNOWN	4.36343	-0.705431
TACC3	ENSG00000013810.18	protein_coding	KNOWN	6.28038	0.899984
TAF12	ENSG00000120656.11	protein_coding	KNOWN	1.98898	-0.221038
TAGLN2	ENSG00000158710.14	protein_coding	KNOWN	4.13471	0.906691
TANC1	ENSG00000115183.13	protein_coding	KNOWN	4.14034	1.05743
TBC1D1	ENSG00000065882.15	protein_coding	KNOWN	2.00693	-0.924296
TBC1D2B	ENSG00000167202.11	protein_coding	KNOWN	2.10134	2.45948
TBC1D31	ENSG00000156787.16	protein_coding	KNOWN	2.72127	0.6777
TBC1D5	ENSG00000131374.14	protein_coding	KNOWN	2.60935	0.9968
TCF7L1	ENSG00000152284.4	protein_coding	KNOWN	4.79134	1.1161
TDP1	ENSG00000042088.13	protein_coding	KNOWN	2.73129	0.784054
TEAD1	ENSG00000187079.14	protein_coding	KNOWN	1.9789	1.10865
TEAD2	ENSG00000074219.13	protein_coding	KNOWN	2.3969	-0.614126
TEAD3	ENSG00000007866.18	protein_coding	KNOWN	2.62711	-0.452238
TET1	ENSG00000138336.8	protein_coding	KNOWN	2.15818	-0.320523
TFAP2C	ENSG00000087510.6	protein_coding	KNOWN	7.02473	1.29444
TFG	ENSG00000114354.12	protein_coding	KNOWN	2.23329	0.58986
TGIF1	ENSG00000177426.20	protein_coding	KNOWN	4.59236	-1.57982
THBS3	ENSG00000169231.13	protein_coding	KNOWN	2.71899	1.18274
THOC6	ENSG00000131652.13	protein_coding	KNOWN	2.38068	0.829086
THSD4	ENSG00000187720.14	protein_coding	KNOWN	2.96479	-0.735242
TICRR	ENSG00000140534.13	protein_coding	KNOWN	2.9434	-0.452598
TIFA	ENSG00000145365.10	protein_coding	KNOWN	2.6188	1.61725
TIMELESS	ENSG00000111602.11	protein_coding	KNOWN	4.97872	1.38521
TIPIN	ENSG00000075131.9	protein_coding	KNOWN	2.43692	1.36688
TJP1	ENSG00000104067.16	protein_coding	KNOWN	3.2567	-1.31032
TK1	ENSG00000167900.11	protein_coding	KNOWN	6.00245	0.688043
TKFC	ENSG00000149476.14	protein_coding	KNOWN	2.31926	0.837984
TKTL1	ENSG00000007350.16	protein_coding	KNOWN	4.01187	2.32506
TLE4	ENSG00000106829.18	protein_coding	KNOWN	3.32054	-0.724277
TMA16	ENSG00000198498.9	protein_coding	KNOWN	2.7254	0.920857
TMBIM6	ENSG00000139644.12	protein_coding	KNOWN	2.70065	-0.726043
TMEM109	ENSG00000110108.9	protein_coding	KNOWN	2.26045	1.52017
TMEM123	ENSG00000152558.14	protein_coding	KNOWN	4.42064	-0.71158
TMEM131	ENSG00000075568.16	protein_coding	KNOWN	2.71824	0.0213454
TMEM141	ENSG00000244187.7	protein_coding	KNOWN	2.00415	-0.227882
TMEM170A	ENSG00000166822.12	protein_coding	KNOWN	5.31333	-0.130787
TMEM18	ENSG00000151353.14	protein_coding	KNOWN	2.6356	-1.23671
TMEM2	ENSG00000135048.13	protein_coding	KNOWN	3.39188	2.14153
TMEM209	ENSG00000146842.16	protein_coding	KNOWN	2.93775	0.616222
TMEM214	ENSG00000119777.18	protein_coding	KNOWN	3.55318	0.730325
TMEM216	ENSG00000187049.9	protein_coding	KNOWN	2.6821	-0.2179
TMEM234	ENSG00000160055.19	protein_coding	KNOWN	4.1527	-1.19244
TMEM243	ENSG00000135185.11	protein_coding	KNOWN	3.18993	0.832014
TMEM38B	ENSG00000095209.11	protein_coding	KNOWN	2.86216	-0.920485
TMEM47	ENSG00000147027.3	protein_coding	KNOWN	5.63938	2.01797
TMEM65	ENSG00000164983.7	protein_coding	KNOWN	2.61568	1.4981
TMEM98	ENSG00000006042.11	protein_coding	KNOWN	3.90222	-0.874967
TMPO	ENSG00000120802.13	protein_coding	KNOWN	5.48229	-0.121203
TMX1	ENSG00000139921.12	protein_coding	KNOWN	3.07073	-0.639644
TNFRSF10D	ENSG00000173530.5	protein_coding	KNOWN	3.68911	2.26043
TNFRSF19	ENSG00000127863.15	protein_coding	KNOWN	4.26292	-0.578726
TNS1	ENSG00000079308.16	protein_coding	KNOWN	1.98794	-0.778669
TOE1	ENSG00000132773.11	protein_coding	KNOWN	2.25308	0.363144
TOM1L1	ENSG00000141198.13	protein_coding	KNOWN	3.02599	0.353895
TONSL	ENSG00000160949.16	protein_coding	KNOWN	2.65091	2.43125
TOP2A	ENSG00000131747.14	protein_coding	KNOWN	7.16081	0
TOX2	ENSG00000124191.17	protein_coding	KNOWN	2.29048	1.5864
TP53	ENSG00000141510.16	protein_coding	KNOWN	5.10999	0
TP53BP2	ENSG00000143514.16	protein_coding	KNOWN	3.33698	1.37558
TPM4	ENSG00000167460.14	protein_coding	KNOWN	2.10145	0.729013
TPP1	ENSG00000166340.14	protein_coding	KNOWN	3.0338	-0.444284
TPX2	ENSG00000088325.15	protein_coding	KNOWN	6.4063	1.60187
TRAF5	ENSG00000082512.14	protein_coding	KNOWN	3.12032	0.0814102
TRAIP	ENSG00000183763.8	protein_coding	KNOWN	2.42217	-0.929784
TRAM2	ENSG00000065308.4	protein_coding	KNOWN	2.32325	0.90837
TRERF1	ENSG00000124496.12	protein_coding	KNOWN	2.3787	1.35818
TRIM25	ENSG00000121060.14	protein_coding	KNOWN	3.80463	-1.47824
TRIM5	ENSG00000132256.18	protein_coding	KNOWN	2.1161	-2.39818
TRIM56	ENSG00000169871.12	protein_coding	KNOWN	3.7243	0.564707
TRIP13	ENSG00000071539.13	protein_coding	KNOWN	4.6622	0.458798
TRIP6	ENSG00000087077.11	protein_coding	KNOWN	2.79031	-2.27884
TRMT2B	ENSG00000188917.14	protein_coding	KNOWN	2.89567	1.06445
TROAP	ENSG00000135451.12	protein_coding	KNOWN	6.85429	0.942239
TRPS1	ENSG00000104447.11	protein_coding	KNOWN	3.72309	1.11533
TSEN54	ENSG00000182173.12	protein_coding	KNOWN	2.49081	2.68635
TSHZ1	ENSG00000179981.9	protein_coding	KNOWN	3.11478	0.970416
TSHZ3	ENSG00000121297.6	protein_coding	KNOWN	2.59242	1.40114
TSPAN11	ENSG00000110900.14	protein_coding	KNOWN	2.2271	1.47081
TSPAN12	ENSG00000106025.8	protein_coding	KNOWN	3.39471	0.800077
TSPAN5	ENSG00000168785.7	protein_coding	KNOWN	2.45811	1.01214
TSPAN6	ENSG00000000003.14	protein_coding	KNOWN	3.33134	-2.22233
TSTD1	ENSG00000215845.10	protein_coding	KNOWN	2.38117	0.909867
TTC12	ENSG00000149292.16	protein_coding	KNOWN	3.49413	-1.11105
TTC23	ENSG00000103852.12	protein_coding	KNOWN	3.48212	-0.280586
TTC25	ENSG00000204815.8	protein_coding	KNOWN	2.21359	0.926711
TTC31	ENSG00000115282.19	protein_coding	KNOWN	2.43223	-0.918714
TTC8	ENSG00000165533.18	protein_coding	KNOWN	2.37555	1.16797
TTF2	ENSG00000116830.11	protein_coding	KNOWN	3.11296	-0.609618
TTI1	ENSG00000101407.12	protein_coding	KNOWN	2.76791	2.79921
TTK	ENSG00000112742.9	protein_coding	KNOWN	5.4122	0.114125
TTLL4	ENSG00000135912.10	protein_coding	KNOWN	3.76792	1.09532
TTPA	ENSG00000137561.4	protein_coding	KNOWN	2.04538	1.20398
TTYH1	ENSG00000167614.13	protein_coding	KNOWN	4.15949	0.57134
TUBA1B	ENSG00000123416.15	protein_coding	KNOWN	4.25525	-0.527488
TUBB4B	ENSG00000188229.5	protein_coding	KNOWN	3.54506	0.292595
TUBB6	ENSG00000176014.12	protein_coding	KNOWN	6.15425	0.0609059
TUBGCP4	ENSG00000137822.12	protein_coding	KNOWN	2.47026	2.0348
TULP3	ENSG00000078246.15	protein_coding	KNOWN	2.65682	0.320429
TWF1	ENSG00000151239.13	protein_coding	KNOWN	2.18658	2.37338
TWSG1	ENSG00000128791.11	protein_coding	KNOWN	4.15116	1.96173
TYMS	ENSG00000176890.15	protein_coding	KNOWN	3.53398	0.954325
TYW3	ENSG00000162623.15	protein_coding	KNOWN	3.35793	-1.71116
UAP1	ENSG00000117143.13	protein_coding	KNOWN	2.20896	0.313493
UBALD2	ENSG00000185262.8	protein_coding	KNOWN	2.24215	0.519028
UBE2S	ENSG00000108106.13	protein_coding	KNOWN	2.62195	0.46271
UBE2T	ENSG00000077152.9	protein_coding	KNOWN	4.80295	0.0378405
UBXN2A	ENSG00000173960.12	protein_coding	KNOWN	2.56204	-0.616947
UFSP2	ENSG00000109775.10	protein_coding	KNOWN	2.12705	0.129663
UGGT2	ENSG00000102595.18	protein_coding	KNOWN	2.34679	1.03898
UGT8	ENSG00000174607.10	protein_coding	KNOWN	2.10024	-0.574457
UHRF1	ENSG00000276043.4	protein_coding	KNOWN	4.49819	2.49775
UNC5C	ENSG00000182168.14	protein_coding	KNOWN	3.82156	-0.752989
USP1	ENSG00000162607.12	protein_coding	KNOWN	3.36128	-1.67762
USP19	ENSG00000172046.18	protein_coding	KNOWN	2.65657	2.41975
USP2	ENSG00000036672.15	protein_coding	KNOWN	2.5693	0.657578
USP21	ENSG00000143258.15	protein_coding	KNOWN	2.2886	1.59422
USP53	ENSG00000145390.11	protein_coding	KNOWN	4.73824	0.818569
UTRN	ENSG00000152818.18	protein_coding	KNOWN	6.71255	1.44605
VCAM1	ENSG00000162692.10	protein_coding	KNOWN	6.9827	0.285792
VCAN	ENSG00000038427.15	protein_coding	KNOWN	4.16236	2.49104
VCL	ENSG00000035403.16	protein_coding	KNOWN	4.13326	1.18493
VEGFB	ENSG00000173511.9	protein_coding	KNOWN	2.84251	0.874214
VIM	ENSG00000026025.13	protein_coding	KNOWN	6.38494	-2.20477
VWA1	ENSG00000179403.11	protein_coding	KNOWN	3.53598	1.91301
VWA8	ENSG00000102763.15	protein_coding	KNOWN	2.0308	2.06423
VWA9	ENSG00000138614.14	protein_coding	KNOWN	3.65791	0
WDHD1	ENSG00000198554.11	protein_coding	KNOWN	3.82709	0.55951
WDPCP	ENSG00000143951.15	protein_coding	KNOWN	2.76068	1.16758
WDR1	ENSG00000071127.16	protein_coding	KNOWN	3.07828	0.218965
WDR53	ENSG00000185798.7	protein_coding	KNOWN	2.30902	-0.934984
WDR62	ENSG00000075702.16	protein_coding	KNOWN	4.90186	0.388836
WDR76	ENSG00000092470.11	protein_coding	KNOWN	2.43812	-0.633473
WEE1	ENSG00000166483.10	protein_coding	KNOWN	6.76045	2.34875
WHSC1	ENSG00000109685.17	protein_coding	KNOWN	2.08351	0.356319
WIPF1	ENSG00000115935.16	protein_coding	KNOWN	2.52433	0.51322
WRAP53	ENSG00000141499.16	protein_coding	KNOWN	2.45607	-0.181872
WRN	ENSG00000165392.9	protein_coding	KNOWN	2.32056	-0.0919477
WSCD1	ENSG00000179314.13	protein_coding	KNOWN	3.24059	-0.656383
XRCC1	ENSG00000073050.11	protein_coding	KNOWN	2.56923	0.681414
XRCC2	ENSG00000196584.2	protein_coding	KNOWN	5.83828	0.874417
XRCC6	ENSG00000196419.12	protein_coding	KNOWN	2.42272	0.6091
XRCC6BP1	ENSG00000166896.7	protein_coding	KNOWN	2.41852	1.71943
XYLB	ENSG00000093217.9	protein_coding	KNOWN	3.34923	2.54685
XYLT1	ENSG00000103489.11	protein_coding	KNOWN	4.5977	-2.58807
YAP1	ENSG00000137693.13	protein_coding	KNOWN	3.93117	-1.51568
YBX3	ENSG00000060138.12	protein_coding	KNOWN	4.08179	1.8017
YEATS4	ENSG00000127337.6	protein_coding	KNOWN	3.20328	1.60387
YES1	ENSG00000176105.13	protein_coding	KNOWN	2.28599	-0.0108293
YKT6	ENSG00000106636.7	protein_coding	KNOWN	2.05906	0.471112
ZADH2	ENSG00000180011.6	protein_coding	KNOWN	2.12715	-1.26389
ZBTB20	ENSG00000181722.15	protein_coding	KNOWN	3.28081	-0.339665
ZBTB48	ENSG00000204859.11	protein_coding	KNOWN	2.77428	0.941971
ZC3HAV1	ENSG00000105939.12	protein_coding	KNOWN	4.78788	-0.178105
ZCCHC24	ENSG00000165424.6	protein_coding	KNOWN	2.32159	1.11747
ZCCHC3	ENSG00000247315.3	protein_coding	KNOWN	2.11849	-0.361685
ZDHHC13	ENSG00000177054.13	protein_coding	KNOWN	2.05003	1.28013
ZEB1	ENSG00000148516.21	protein_coding	KNOWN	2.6833	-0.857279
ZFHX4	ENSG00000091656.15	protein_coding	KNOWN	6.79106	-1.82194
ZFP36L1	ENSG00000185650.9	protein_coding	KNOWN	7.16081	0.389706
ZFP36L2	ENSG00000152518.6	protein_coding	KNOWN	5.85934	-1.35503
ZFX	ENSG00000005889.15	protein_coding	KNOWN	2.5383	1.47208
ZIC2	ENSG00000043355.10	protein_coding	KNOWN	2.17172	-0.429668
ZIC5	ENSG00000139800.8	protein_coding	KNOWN	2.72592	-0.125756
ZMYM1	ENSG00000197056.9	protein_coding	KNOWN	2.74656	-0.576857
ZNF212	ENSG00000170260.8	protein_coding	KNOWN	2.99141	-0.358233
ZNF217	ENSG00000171940.13	protein_coding	KNOWN	2.79678	0
ZNF22	ENSG00000165512.4	protein_coding	KNOWN	2.51239	0.570831
ZNF221	ENSG00000159905.14	protein_coding	KNOWN	3.02173	1.22418
ZNF222	ENSG00000159885.13	protein_coding	KNOWN	2.50006	1.99174
ZNF395	ENSG00000186918.13	protein_coding	KNOWN	2.07444	-0.158152
ZNF474	ENSG00000164185.4	protein_coding	KNOWN	4.14279	2.20624
ZNF486	ENSG00000256229.7	protein_coding	KNOWN	2.84067	-0.301616
ZNF530	ENSG00000183647.10	protein_coding	KNOWN	2.25286	2.2736
ZNF599	ENSG00000153896.17	protein_coding	KNOWN	2.14759	2.35034
ZNF607	ENSG00000198182.12	protein_coding	KNOWN	2.06634	0.459466
ZNF649	ENSG00000198093.10	protein_coding	KNOWN	2.18762	0.7747
ZNF665	ENSG00000197497.10	protein_coding	KNOWN	2.60325	2.74446
ZNF730	ENSG00000183850.13	protein_coding	KNOWN	2.72505	2.49457
ZNF732	ENSG00000186777.11	protein_coding	KNOWN	2.93283	-0.455697
ZNF90	ENSG00000213988.9	protein_coding	KNOWN	3.13647	2.92826
ZP3	ENSG00000188372.14	protein_coding	KNOWN	2.13049	0.416056
ZRANB3	ENSG00000121988.17	protein_coding	KNOWN	3.51084	-1.30239
ZSCAN20	ENSG00000121903.14	protein_coding	KNOWN	2.31096	1.493
ZWINT	ENSG00000122952.16	protein_coding	KNOWN	5.47222	2.81937

## Sheet: NotDE_AP_GO
Note: Genes higher expressed in human APs compared to human Neurons and not differentially expressed between human and chimpazee APs
Annotation Cluster 1	Enrichment Score: 33.53660263321828
Category	Term	Count	%	PValue	Genes	List Total	Pop Hits	Pop Total	Fold Enrichment	Bonferroni	Benjamini	FDR
SP_PIR_KEYWORDS	cell cycle	149	11.3914	6.28309e-43	ENSG00000141639, ENSG00000138758, ENSG00000114166, ENSG00000160783, ENSG00000140525, ENSG00000122952, ENSG00000156970, ENSG00000111602, ENSG00000167670, ENSG00000171320, ENSG00000152253, ENSG00000184445, ENSG00000135446, ENSG00000123374, ENSG00000120253, ENSG00000116117, ENSG00000072864, ENSG00000136982, ENSG00000186871, ENSG00000126787, ENSG00000137337, ENSG00000112941, ENSG00000134690, ENSG0000…	1305	388	11119	3.27197	3.60649e-40	3.60649e-40	9.22338e-40
GOTERM_BP_FAT	GO:0000279~M phase	117	8.94495	9.39413e-36	ENSG00000168078, ENSG00000071539, ENSG00000160783, ENSG00000122952, ENSG00000156970, ENSG00000111602, ENSG00000179041, ENSG00000174371, ENSG00000121621, ENSG00000152253, ENSG00000184445, ENSG00000123374, ENSG00000121211, ENSG00000120253, ENSG00000072864, ENSG00000136982, ENSG00000112742, ENSG00000163808, ENSG00000186871, ENSG00000051825, ENSG00000126787, ENSG00000112941, ENSG00000134690, ENSG0000…	1031	275	8117	3.34958	2.94694e-32	2.94694e-32	1.69999e-32
GOTERM_BP_FAT	GO:0007049~cell cycle	193	14.7554	2.8021e-35	ENSG00000141639, ENSG00000168078, ENSG00000071539, ENSG00000197956, ENSG00000114166, ENSG00000160783, ENSG00000122952, ENSG00000156970, ENSG00000111602, ENSG00000118495, ENSG00000171320, ENSG00000184445, ENSG00000121211, ENSG00000123374, ENSG00000120253, ENSG00000138376, ENSG00000116117, ENSG00000136982, ENSG00000134222, ENSG00000126787, ENSG00000186871, ENSG00000137337, ENSG00000122966, ENSG0000…	1031	630	8117	2.41187	8.79019e-32	4.39509e-32	5.07076e-32
GOTERM_BP_FAT	GO:0022403~cell cycle phase	132	10.0917	1.31501e-34	ENSG00000168078, ENSG00000071539, ENSG00000160783, ENSG00000101868, ENSG00000122952, ENSG00000156970, ENSG00000111602, ENSG00000179041, ENSG00000174371, ENSG00000197299, ENSG00000121621, ENSG00000152253, ENSG00000184445, ENSG00000135446, ENSG00000123374, ENSG00000121211, ENSG00000120253, ENSG00000072864, ENSG00000136982, ENSG00000112742, ENSG00000163808, ENSG00000186871, ENSG00000051825, ENSG0000…	1031	345	8117	3.01225	4.12517e-31	1.37506e-31	2.37967e-31
SP_PIR_KEYWORDS	cell division	101	7.72171	1.42503e-34	ENSG00000138758, ENSG00000160783, ENSG00000122952, ENSG00000156970, ENSG00000111602, ENSG00000152253, ENSG00000135446, ENSG00000184445, ENSG00000123374, ENSG00000120253, ENSG00000116117, ENSG00000072864, ENSG00000186871, ENSG00000112941, ENSG00000134690, ENSG00000122966, ENSG00000146670, ENSG00000011426, ENSG00000198924, ENSG00000075131, ENSG00000108106, ENSG00000168385, ENSG00000167967, ENSG0000…	1305	231	11119	3.72533	8.17969e-32	4.08985e-32	2.0919e-31
GOTERM_BP_FAT	GO:0000280~nuclear division	95	7.263	1.62577e-34	ENSG00000010292, ENSG00000111859, ENSG00000112029, ENSG00000164045, ENSG00000117724, ENSG00000168078, ENSG00000092036, ENSG00000160783, ENSG00000149636, ENSG00000122952, ENSG00000136122, ENSG00000156970, ENSG00000179041, ENSG00000111602, ENSG00000101224, ENSG00000121621, ENSG00000152253, ENSG00000164109, ENSG00000184445, ENSG00000123374, ENSG00000145386, ENSG00000164754, ENSG00000120253, ENSG0000…	1031	196	8117	3.81597	5.10005e-31	1.27501e-31	2.94205e-31
GOTERM_BP_FAT	GO:0007067~mitosis	95	7.263	1.62577e-34	ENSG00000010292, ENSG00000111859, ENSG00000112029, ENSG00000164045, ENSG00000117724, ENSG00000168078, ENSG00000092036, ENSG00000160783, ENSG00000149636, ENSG00000122952, ENSG00000136122, ENSG00000156970, ENSG00000179041, ENSG00000111602, ENSG00000101224, ENSG00000121621, ENSG00000152253, ENSG00000164109, ENSG00000184445, ENSG00000123374, ENSG00000145386, ENSG00000164754, ENSG00000120253, ENSG0000…	1031	196	8117	3.81597	5.10005e-31	1.27501e-31	2.94205e-31
GOTERM_BP_FAT	GO:0000087~M phase of mitotic cell cycle	96	7.33945	1.91465e-34	ENSG00000010292, ENSG00000111859, ENSG00000112029, ENSG00000164045, ENSG00000117724, ENSG00000168078, ENSG00000092036, ENSG00000160783, ENSG00000149636, ENSG00000122952, ENSG00000136122, ENSG00000156970, ENSG00000179041, ENSG00000111602, ENSG00000101224, ENSG00000121621, ENSG00000152253, ENSG00000164109, ENSG00000184445, ENSG00000123374, ENSG00000145386, ENSG00000164754, ENSG00000120253, ENSG0000…	1031	200	8117	3.77901	6.00625e-31	1.20125e-31	3.4648e-31
SP_PIR_KEYWORDS	mitosis	84	6.42202	3.06109e-34	ENSG00000010292, ENSG00000111859, ENSG00000112029, ENSG00000164045, ENSG00000117724, ENSG00000092036, ENSG00000160783, ENSG00000149636, ENSG00000122952, ENSG00000136122, ENSG00000156970, ENSG00000111602, ENSG00000101224, ENSG00000152253, ENSG00000164109, ENSG00000184445, ENSG00000123374, ENSG00000145386, ENSG00000164754, ENSG00000120253, ENSG00000072864, ENSG00000113810, ENSG00000101972, ENSG0000…	1305	167	11119	4.28566	1.75707e-31	5.85688e-32	4.49358e-31
GOTERM_BP_FAT	GO:0048285~organelle fission	96	7.33945	2.39666e-33	ENSG00000010292, ENSG00000111859, ENSG00000112029, ENSG00000164045, ENSG00000117724, ENSG00000168078, ENSG00000092036, ENSG00000160783, ENSG00000149636, ENSG00000122952, ENSG00000136122, ENSG00000156970, ENSG00000179041, ENSG00000111602, ENSG00000101224, ENSG00000121621, ENSG00000152253, ENSG00000164109, ENSG00000184445, ENSG00000123374, ENSG00000145386, ENSG00000164754, ENSG00000120253, ENSG0000…	1031	205	8117	3.68684	7.51832e-30	1.25305e-30	4.33706e-30
GOTERM_BP_FAT	GO:0051301~cell division	106	8.10398	6.04675e-31	ENSG00000138758, ENSG00000160783, ENSG00000122952, ENSG00000156970, ENSG00000111602, ENSG00000152253, ENSG00000135446, ENSG00000184445, ENSG00000123374, ENSG00000120253, ENSG00000116117, ENSG00000072864, ENSG00000186871, ENSG00000112941, ENSG00000134690, ENSG00000122966, ENSG00000146670, ENSG00000147202, ENSG00000011426, ENSG00000204209, ENSG00000198924, ENSG00000075131, ENSG00000148400, ENSG0000…	1031	257	8117	3.2472	1.89686e-27	2.70981e-28	1.09424e-27
GOTERM_BP_FAT	GO:0022402~cell cycle process	152	11.6208	1.47045e-30	ENSG00000168078, ENSG00000071539, ENSG00000114166, ENSG00000160783, ENSG00000101868, ENSG00000122952, ENSG00000156970, ENSG00000111602, ENSG00000179041, ENSG00000174371, ENSG00000197299, ENSG00000118495, ENSG00000121621, ENSG00000152253, ENSG00000184445, ENSG00000135446, ENSG00000123374, ENSG00000121211, ENSG00000120253, ENSG00000138376, ENSG00000072864, ENSG00000136982, ENSG00000112742, ENSG0000…	1031	468	8117	2.55702	4.61281e-27	5.76601e-28	2.66097e-27
GOTERM_BP_FAT	GO:0000278~mitotic cell cycle	120	9.17431	1.03332e-29	ENSG00000168078, ENSG00000160783, ENSG00000101868, ENSG00000122952, ENSG00000156970, ENSG00000111602, ENSG00000179041, ENSG00000197299, ENSG00000121621, ENSG00000152253, ENSG00000184445, ENSG00000135446, ENSG00000123374, ENSG00000120253, ENSG00000072864, ENSG00000136982, ENSG00000112742, ENSG00000163808, ENSG00000186871, ENSG00000051825, ENSG00000126787, ENSG00000112941, ENSG00000134690, ENSG0000…	1031	325	8117	2.90693	3.24153e-26	3.6017e-27	1.86993e-26
Annotation Cluster 2	Enrichment Score: 17.87296964686316
Category	Term	Count	%	PValue	Genes	List Total	Pop Hits	Pop Total	Fold Enrichment	Bonferroni	Benjamini	FDR
GOTERM_CC_FAT	GO:0005694~chromosome	119	9.09786	1.25522e-26	ENSG00000188312, ENSG00000171316, ENSG00000196419, ENSG00000160783, ENSG00000140525, ENSG00000101868, ENSG00000122952, ENSG00000156970, ENSG00000111602, ENSG00000179041, ENSG00000111581, ENSG00000197299, ENSG00000102384, ENSG00000152253, ENSG00000184357, ENSG00000184445, ENSG00000123374, ENSG00000120253, ENSG00000131747, ENSG00000072864, ENSG00000136982, ENSG00000186871, ENSG00000145241, ENSG0000…	906	352	7303	2.72507	6.62758e-24	6.62758e-24	1.82142e-23
GOTERM_CC_FAT	GO:0044427~chromosomal part	107	8.18043	3.41117e-26	ENSG00000171316, ENSG00000188312, ENSG00000196419, ENSG00000160783, ENSG00000101868, ENSG00000122952, ENSG00000156970, ENSG00000111602, ENSG00000111581, ENSG00000197299, ENSG00000102384, ENSG00000152253, ENSG00000184357, ENSG00000184445, ENSG00000123374, ENSG00000120253, ENSG00000072864, ENSG00000136982, ENSG00000186871, ENSG00000145241, ENSG00000134690, ENSG00000146670, ENSG00000141510, ENSG0000…	906	299	7303	2.8846	1.8011e-23	9.00548e-24	4.94985e-23
GOTERM_CC_FAT	GO:0000793~condensed chromosome	53	4.05199	1.782e-19	ENSG00000010292, ENSG00000123485, ENSG00000117724, ENSG00000151725, ENSG00000138092, ENSG00000160783, ENSG00000149636, ENSG00000122952, ENSG00000156970, ENSG00000179041, ENSG00000111581, ENSG00000197299, ENSG00000164104, ENSG00000152253, ENSG00000164109, ENSG00000184445, ENSG00000123374, ENSG00000120253, ENSG00000189403, ENSG00000185513, ENSG00000072864, ENSG00000113810, ENSG00000142945, ENSG0000…	906	111	7303	3.84881	9.40897e-17	3.13632e-17	2.58581e-16
SP_PIR_KEYWORDS	kinetochore	35	2.67584	1.05995e-17	ENSG00000138778, ENSG00000166451, ENSG00000117724, ENSG00000151725, ENSG00000149503, ENSG00000138092, ENSG00000160783, ENSG00000149636, ENSG00000143228, ENSG00000122952, ENSG00000156970, ENSG00000111581, ENSG00000115163, ENSG00000152253, ENSG00000153044, ENSG00000166851, ENSG00000129810, ENSG00000164109, ENSG00000184445, ENSG00000154839, ENSG00000123219, ENSG00000120253, ENSG00000169679, ENSG0000…	1305	58	11119	5.14156	6.08414e-15	1.21683e-15	1.55598e-14
GOTERM_CC_FAT	GO:0000775~chromosome, centromeric region	50	3.82263	1.69273e-17	ENSG00000188312, ENSG00000123485, ENSG00000117724, ENSG00000151725, ENSG00000120334, ENSG00000138092, ENSG00000160783, ENSG00000149636, ENSG00000122952, ENSG00000156970, ENSG00000111581, ENSG00000102384, ENSG00000152253, ENSG00000164109, ENSG00000184445, ENSG00000120253, ENSG00000072864, ENSG00000136982, ENSG00000142945, ENSG00000145241, ENSG00000186871, ENSG00000134690, ENSG00000119969, ENSG0000…	906	109	7303	3.69757	8.93763e-15	2.23441e-15	2.45627e-14
GOTERM_CC_FAT	GO:0000779~condensed chromosome, centromeric region	34	2.59939	2.182e-15	ENSG00000138778, ENSG00000166451, ENSG00000117724, ENSG00000123485, ENSG00000151725, ENSG00000138092, ENSG00000160783, ENSG00000149636, ENSG00000143228, ENSG00000122952, ENSG00000156970, ENSG00000111581, ENSG00000115163, ENSG00000152253, ENSG00000153044, ENSG00000178999, ENSG00000129810, ENSG00000164109, ENSG00000184445, ENSG00000154839, ENSG00000123219, ENSG00000120253, ENSG00000169679, ENSG0000…	906	60	7303	4.56773	1.1724e-12	1.67533e-13	3.21965e-12
GOTERM_CC_FAT	GO:0000777~condensed chromosome kinetochore	31	2.37003	2.92841e-14	ENSG00000138778, ENSG00000166451, ENSG00000117724, ENSG00000123485, ENSG00000151725, ENSG00000138092, ENSG00000160783, ENSG00000149636, ENSG00000143228, ENSG00000122952, ENSG00000156970, ENSG00000111581, ENSG00000115163, ENSG00000152253, ENSG00000153044, ENSG00000164109, ENSG00000184445, ENSG00000154839, ENSG00000123219, ENSG00000120253, ENSG00000169679, ENSG00000072864, ENSG00000075188, ENSG0000…	906	54	7303	4.62744	1.54756e-11	1.93445e-12	4.25326e-11
GOTERM_CC_FAT	GO:0000776~kinetochore	33	2.52294	1.18672e-11	ENSG00000138778, ENSG00000166451, ENSG00000117724, ENSG00000123485, ENSG00000151725, ENSG00000138092, ENSG00000110713, ENSG00000160783, ENSG00000149636, ENSG00000143228, ENSG00000122952, ENSG00000156970, ENSG00000111581, ENSG00000115163, ENSG00000152253, ENSG00000153044, ENSG00000164109, ENSG00000184445, ENSG00000154839, ENSG00000123219, ENSG00000120253, ENSG00000169679, ENSG00000072864, ENSG0000…	906	72	7303	3.69449	6.26587e-09	5.22156e-10	1.72201e-08
Annotation Cluster 3	Enrichment Score: 15.81205377017643
Category	Term	Count	%	PValue	Genes	List Total	Pop Hits	Pop Total	Fold Enrichment	Bonferroni	Benjamini	FDR
GOTERM_BP_FAT	GO:0006260~DNA replication	73	5.58104	4.23717e-24	ENSG00000164045, ENSG00000051341, ENSG00000167325, ENSG00000176890, ENSG00000117724, ENSG00000085840, ENSG00000106399, ENSG00000101868, ENSG00000138346, ENSG00000147536, ENSG00000167670, ENSG00000197299, ENSG00000125885, ENSG00000111445, ENSG00000164104, ENSG00000104738, ENSG00000065328, ENSG00000123374, ENSG00000100479, ENSG00000131747, ENSG00000189403, ENSG00000136982, ENSG00000168496, ENSG0000…	1031	162	8117	3.54768	1.3292e-20	1.3292e-21	7.66771e-21
SP_PIR_KEYWORDS	dna replication	42	3.21101	2.00085e-18	ENSG00000073111, ENSG00000117748, ENSG00000167325, ENSG00000085840, ENSG00000102054, ENSG00000049541, ENSG00000167513, ENSG00000143476, ENSG00000106399, ENSG00000101868, ENSG00000138346, ENSG00000147536, ENSG00000100297, ENSG00000035928, ENSG00000167670, ENSG00000131153, ENSG00000197299, ENSG00000111445, ENSG00000125885, ENSG00000104738, ENSG00000166508, ENSG00000065328, ENSG00000132383, ENSG0000…	1305	79	11119	4.52978	1.14849e-15	2.87122e-16	2.93719e-15
KEGG_PATHWAY	hsa03030:DNA replication	23	1.75841	5.71391e-13	ENSG00000073111, ENSG00000117748, ENSG00000106628, ENSG00000014138, ENSG00000168496, ENSG00000049541, ENSG00000106399, ENSG00000101868, ENSG00000133119, ENSG00000138346, ENSG00000100297, ENSG00000163918, ENSG00000035928, ENSG00000076003, ENSG00000077514, ENSG00000111445, ENSG00000112118, ENSG00000104738, ENSG00000166508, ENSG00000132383, ENSG00000198056, ENSG00000104889, ENSG00000100479	394	32	2952	5.38515	9.37148e-11	9.37148e-11	6.92901e-10
GOTERM_BP_FAT	GO:0006261~DNA-dependent DNA replication	27	2.06422	1.16563e-10	ENSG00000073111, ENSG00000117748, ENSG00000139618, ENSG00000085840, ENSG00000175305, ENSG00000101868, ENSG00000138346, ENSG00000035928, ENSG00000100297, ENSG00000197299, ENSG00000164104, ENSG00000104738, ENSG00000166508, ENSG00000165392, ENSG00000132383, ENSG00000100479, ENSG00000189403, ENSG00000106628, ENSG00000093009, ENSG00000168496, ENSG00000133119, ENSG00000163918, ENSG00000076003, ENSG0000…	1031	53	8117	4.01074	3.65658e-07	2.43772e-08	2.10935e-07
Annotation Cluster 4	Enrichment Score: 10.31052760375624
Category	Term	Count	%	PValue	Genes	List Total	Pop Hits	Pop Total	Fold Enrichment	Bonferroni	Benjamini	FDR
GOTERM_CC_FAT	GO:0043232~intracellular non-membrane-bounded organelle	328	25.0765	3.95187e-16	ENSG00000106571, ENSG00000107736, ENSG00000171316, ENSG00000188312, ENSG00000126878, ENSG00000090889, ENSG00000064393, ENSG00000050405, ENSG00000146909, ENSG00000197321, ENSG00000160783, ENSG00000168724, ENSG00000121957, ENSG00000122952, ENSG00000137822, ENSG00000156970, ENSG00000111602, ENSG00000107438, ENSG00000102384, ENSG00000163584, ENSG00000089157, ENSG00000117519, ENSG00000184357, ENSG0000…	906	1815	7303	1.4567	2.34479e-13	4.68514e-14	6.43929e-13
GOTERM_CC_FAT	GO:0043228~non-membrane-bounded organelle	328	25.0765	3.95187e-16	ENSG00000106571, ENSG00000107736, ENSG00000171316, ENSG00000188312, ENSG00000126878, ENSG00000090889, ENSG00000064393, ENSG00000050405, ENSG00000146909, ENSG00000197321, ENSG00000160783, ENSG00000168724, ENSG00000121957, ENSG00000122952, ENSG00000137822, ENSG00000156970, ENSG00000111602, ENSG00000107438, ENSG00000102384, ENSG00000163584, ENSG00000089157, ENSG00000117519, ENSG00000184357, ENSG0000…	906	1815	7303	1.4567	2.34479e-13	4.68514e-14	6.43929e-13
GOTERM_CC_FAT	GO:0005819~spindle	54	4.12844	8.91944e-16	ENSG00000111859, ENSG00000112029, ENSG00000117724, ENSG00000090889, ENSG00000092036, ENSG00000137822, ENSG00000156970, ENSG00000121621, ENSG00000164109, ENSG00000184445, ENSG00000102699, ENSG00000118193, ENSG00000072864, ENSG00000112742, ENSG00000134222, ENSG00000163808, ENSG00000126787, ENSG00000147874, ENSG00000134690, ENSG00000101871, ENSG00000080345, ENSG00000087586, ENSG00000135837, ENSG0000…	906	134	7303	3.24834	4.68958e-13	7.81597e-14	1.28786e-12
GOTERM_CC_FAT	GO:0015630~microtubule cytoskeleton	109	8.33333	6.20335e-13	ENSG00000107736, ENSG00000090889, ENSG00000064393, ENSG00000137822, ENSG00000156970, ENSG00000188229, ENSG00000121621, ENSG00000184445, ENSG00000122735, ENSG00000131747, ENSG00000072864, ENSG00000112742, ENSG00000134222, ENSG00000163808, ENSG00000126787, ENSG00000137177, ENSG00000134690, ENSG00000036672, ENSG00000101871, ENSG00000112118, ENSG00000213024, ENSG00000087586, ENSG00000135837, ENSG0000…	906	444	7303	1.97887	3.27509e-10	3.63899e-11	9.00069e-10
GOTERM_CC_FAT	GO:0044430~cytoskeletal part	135	10.3211	2.23615e-12	ENSG00000107736, ENSG00000126878, ENSG00000196923, ENSG00000095777, ENSG00000090889, ENSG00000064393, ENSG00000128641, ENSG00000050405, ENSG00000138758, ENSG00000197321, ENSG00000073712, ENSG00000137822, ENSG00000156970, ENSG00000188229, ENSG00000121621, ENSG00000117519, ENSG00000184445, ENSG00000145555, ENSG00000167460, ENSG00000122735, ENSG00000131747, ENSG00000072864, ENSG00000152818, ENSG0000…	906	608	7303	1.7898	1.18066e-09	1.18066e-10	3.24474e-09
SP_PIR_KEYWORDS	cytoskeleton	102	7.79817	5.08683e-09	ENSG00000196923, ENSG00000126878, ENSG00000095777, ENSG00000090889, ENSG00000050405, ENSG00000138758, ENSG00000197321, ENSG00000087077, ENSG00000073712, ENSG00000137822, ENSG00000156970, ENSG00000107438, ENSG00000121621, ENSG00000184445, ENSG00000167460, ENSG00000072864, ENSG00000152818, ENSG00000163808, ENSG00000126787, ENSG00000134690, ENSG00000011426, ENSG00000101871, ENSG00000213024, ENSG0000…	1305	489	11119	1.77724	2.91984e-06	2.6544e-07	7.46731e-06
GOTERM_CC_FAT	GO:0005856~cytoskeleton	167	12.7676	9.14101e-09	ENSG00000107736, ENSG00000126878, ENSG00000196923, ENSG00000095777, ENSG00000090889, ENSG00000064393, ENSG00000128641, ENSG00000050405, ENSG00000138758, ENSG00000197321, ENSG00000073712, ENSG00000137822, ENSG00000156970, ENSG00000107438, ENSG00000188229, ENSG00000121621, ENSG00000117519, ENSG00000184445, ENSG00000145555, ENSG00000167460, ENSG00000122735, ENSG00000131747, ENSG00000072864, ENSG0000…	906	895	7303	1.50406	4.82644e-06	3.44747e-07	1.32643e-05
GOTERM_CC_FAT	GO:0005815~microtubule organizing center	56	4.28135	6.49957e-08	ENSG00000142731, ENSG00000107736, ENSG00000135912, ENSG00000064393, ENSG00000129474, ENSG00000119397, ENSG00000092036, ENSG00000137822, ENSG00000156970, ENSG00000101224, ENSG00000121621, ENSG00000174799, ENSG00000164109, ENSG00000092820, ENSG00000131747, ENSG00000072864, ENSG00000180628, ENSG00000213066, ENSG00000163808, ENSG00000126787, ENSG00000147874, ENSG00000044459, ENSG00000036672, ENSG0000…	906	215	7303	2.09953	3.43171e-05	2.28785e-06	9.43134e-05
GOTERM_CC_FAT	GO:0005813~centrosome	49	3.74618	1.29667e-06	ENSG00000142731, ENSG00000135837, ENSG00000135476, ENSG00000139618, ENSG00000064393, ENSG00000079335, ENSG00000141971, ENSG00000129474, ENSG00000119397, ENSG00000134057, ENSG00000136811, ENSG00000092036, ENSG00000089685, ENSG00000181163, ENSG00000131351, ENSG00000137822, ENSG00000156970, ENSG00000101224, ENSG00000121621, ENSG00000174799, ENSG00000166851, ENSG00000165392, ENSG00000183137, ENSG0000…	906	194	7303	2.03595	0.000684409	3.42316e-05	0.00188155
GOTERM_CC_FAT	GO:0005874~microtubule	46	3.51682	0.000103633	ENSG00000186185, ENSG00000138778, ENSG00000161800, ENSG00000090889, ENSG00000176014, ENSG00000149503, ENSG00000136811, ENSG00000197892, ENSG00000092036, ENSG00000170312, ENSG00000187240, ENSG00000089685, ENSG00000131351, ENSG00000137822, ENSG00000138160, ENSG00000136108, ENSG00000138771, ENSG00000123416, ENSG00000188229, ENSG00000121621, ENSG00000137804, ENSG00000137807, ENSG00000184445, ENSG0000…	906	208	7303	1.78266	0.0532508	0.00218645	0.150274
Annotation Cluster 5	Enrichment Score: 9.88886835748089
Category	Term	Count	%	PValue	Genes	List Total	Pop Hits	Pop Total	Fold Enrichment	Bonferroni	Benjamini	FDR
GOTERM_BP_FAT	GO:0006259~DNA metabolic process	125	9.55657	1.29452e-22	ENSG00000051341, ENSG00000176890, ENSG00000071539, ENSG00000196419, ENSG00000140525, ENSG00000101868, ENSG00000136492, ENSG00000145723, ENSG00000131238, ENSG00000221829, ENSG00000147536, ENSG00000167670, ENSG00000122547, ENSG00000174371, ENSG00000197299, ENSG00000171320, ENSG00000123374, ENSG00000100479, ENSG00000121211, ENSG00000178295, ENSG00000131747, ENSG00000138376, ENSG00000136982, ENSG0000…	1031	407	8117	2.41798	4.0609e-19	3.69173e-20	2.34259e-19
GOTERM_BP_FAT	GO:0006974~response to DNA damage stimulus	83	6.34557	2.81714e-11	ENSG00000051341, ENSG00000176890, ENSG00000064393, ENSG00000071539, ENSG00000196419, ENSG00000140525, ENSG00000106399, ENSG00000170430, ENSG00000136492, ENSG00000101868, ENSG00000143799, ENSG00000138346, ENSG00000221829, ENSG00000111602, ENSG00000167670, ENSG00000122547, ENSG00000174371, ENSG00000171320, ENSG00000111445, ENSG00000197299, ENSG00000164104, ENSG00000102699, ENSG00000145386, ENSG0000…	1031	312	8117	2.0944	8.83739e-08	6.79799e-09	5.09799e-08
GOTERM_BP_FAT	GO:0006281~DNA repair	67	5.12232	2.76713e-10	ENSG00000051341, ENSG00000176890, ENSG00000196419, ENSG00000071539, ENSG00000140525, ENSG00000170430, ENSG00000106399, ENSG00000136492, ENSG00000101868, ENSG00000143799, ENSG00000138346, ENSG00000221829, ENSG00000167670, ENSG00000122547, ENSG00000174371, ENSG00000197299, ENSG00000171320, ENSG00000111445, ENSG00000164104, ENSG00000102699, ENSG00000100479, ENSG00000164754, ENSG00000101773, ENSG0000…	1031	239	8117	2.20706	8.68049e-07	5.42531e-08	5.00748e-07
GOTERM_BP_FAT	GO:0033554~cellular response to stress	99	7.56881	4.51773e-08	ENSG00000051341, ENSG00000176890, ENSG00000064393, ENSG00000196419, ENSG00000071539, ENSG00000140525, ENSG00000172037, ENSG00000101868, ENSG00000136492, ENSG00000221829, ENSG00000111602, ENSG00000167670, ENSG00000122547, ENSG00000174371, ENSG00000171320, ENSG00000197299, ENSG00000100479, ENSG00000178295, ENSG00000131747, ENSG00000138376, ENSG00000168496, ENSG00000137337, ENSG00000112941, ENSG0000…	1031	456	8117	1.70926	0.000141711	6.16177e-06	8.17541e-05
SP_PIR_KEYWORDS	DNA damage	43	3.28746	2.30218e-06	ENSG00000182185, ENSG00000196584, ENSG00000187741, ENSG00000181026, ENSG00000139618, ENSG00000196419, ENSG00000131778, ENSG00000140525, ENSG00000170430, ENSG00000143476, ENSG00000181544, ENSG00000136492, ENSG00000143799, ENSG00000152457, ENSG00000144554, ENSG00000221829, ENSG00000111602, ENSG00000020922, ENSG00000167670, ENSG00000174371, ENSG00000110092, ENSG00000164754, ENSG00000111247, ENSG0000…	1305	172	11119	2.13008	0.00132058	9.43849e-05	0.00337947
SP_PIR_KEYWORDS	dna repair	37	2.82875	4.42369e-05	ENSG00000182185, ENSG00000196584, ENSG00000187741, ENSG00000139618, ENSG00000196419, ENSG00000131778, ENSG00000140525, ENSG00000170430, ENSG00000181544, ENSG00000136492, ENSG00000111640, ENSG00000143799, ENSG00000152457, ENSG00000144554, ENSG00000221829, ENSG00000020922, ENSG00000167670, ENSG00000174371, ENSG00000111247, ENSG00000164754, ENSG00000178295, ENSG00000138376, ENSG00000198887, ENSG0000…	1305	156	11119	2.02084	0.0250728	0.00133556	0.0649187
Annotation Cluster 6	Enrichment Score: 7.46044849274844
Category	Term	Count	%	PValue	Genes	List Total	Pop Hits	Pop Total	Fold Enrichment	Bonferroni	Benjamini	FDR
GOTERM_CC_FAT	GO:0005654~nucleoplasm	152	11.6208	8.28588e-12	ENSG00000106571, ENSG00000051341, ENSG00000071243, ENSG00000064393, ENSG00000196419, ENSG00000183684, ENSG00000114166, ENSG00000160783, ENSG00000140525, ENSG00000101868, ENSG00000111605, ENSG00000125944, ENSG00000124782, ENSG00000107438, ENSG00000197299, ENSG00000135446, ENSG00000123374, ENSG00000100479, ENSG00000116830, ENSG00000131747, ENSG00000136982, ENSG00000168495, ENSG00000137337, ENSG0000…	906	725	7303	1.68997	4.37497e-09	3.97725e-10	1.20235e-08
GOTERM_CC_FAT	GO:0031981~nuclear lumen	207	15.8257	4.95562e-09	ENSG00000106571, ENSG00000071243, ENSG00000090889, ENSG00000064393, ENSG00000183684, ENSG00000146909, ENSG00000114166, ENSG00000160783, ENSG00000121957, ENSG00000111605, ENSG00000107438, ENSG00000100479, ENSG00000123374, ENSG00000131747, ENSG00000136982, ENSG00000137337, ENSG00000141510, ENSG00000143947, ENSG00000077514, ENSG00000187079, ENSG00000104626, ENSG00000132773, ENSG00000169016, ENSG0000…	906	1162	7303	1.43594	2.61656e-06	2.01274e-07	7.19096e-06
GOTERM_CC_FAT	GO:0043233~organelle lumen	236	18.0428	6.08752e-07	ENSG00000106571, ENSG00000071243, ENSG00000090889, ENSG00000064393, ENSG00000183684, ENSG00000146909, ENSG00000114166, ENSG00000160783, ENSG00000121957, ENSG00000111605, ENSG00000107438, ENSG00000102595, ENSG00000123374, ENSG00000100479, ENSG00000131747, ENSG00000166598, ENSG00000198721, ENSG00000136982, ENSG00000137337, ENSG00000141510, ENSG00000084754, ENSG00000143947, ENSG00000077514, ENSG0000…	906	1441	7303	1.32014	0.000321369	1.89069e-05	0.000883338
GOTERM_CC_FAT	GO:0070013~intracellular organelle lumen	232	17.737	1.24138e-06	ENSG00000106571, ENSG00000071243, ENSG00000090889, ENSG00000064393, ENSG00000183684, ENSG00000146909, ENSG00000114166, ENSG00000160783, ENSG00000121957, ENSG00000111605, ENSG00000107438, ENSG00000102595, ENSG00000123374, ENSG00000100479, ENSG00000131747, ENSG00000166598, ENSG00000198721, ENSG00000136982, ENSG00000137337, ENSG00000141510, ENSG00000084754, ENSG00000143947, ENSG00000077514, ENSG0000…	906	1424	7303	1.31326	0.000655236	3.44968e-05	0.00180132
GOTERM_CC_FAT	GO:0031974~membrane-enclosed lumen	237	18.1193	1.60685e-06	ENSG00000106571, ENSG00000071243, ENSG00000090889, ENSG00000064393, ENSG00000183684, ENSG00000146909, ENSG00000114166, ENSG00000160783, ENSG00000121957, ENSG00000111605, ENSG00000107438, ENSG00000102595, ENSG00000123374, ENSG00000100479, ENSG00000131747, ENSG00000166598, ENSG00000198721, ENSG00000136982, ENSG00000137337, ENSG00000141510, ENSG00000084754, ENSG00000143947, ENSG00000077514, ENSG0000…	906	1465	7303	1.30402	0.000848057	4.04e-05	0.00233163
Annotation Cluster 7	Enrichment Score: 6.60499057891858
Category	Term	Count	%	PValue	Genes	List Total	Pop Hits	Pop Total	Fold Enrichment	Bonferroni	Benjamini	FDR
GOTERM_BP_FAT	GO:0007059~chromosome segregation	41	3.13456	1.53241e-18	ENSG00000010292, ENSG00000135476, ENSG00000138778, ENSG00000117724, ENSG00000123485, ENSG00000149503, ENSG00000138092, ENSG00000118007, ENSG00000160783, ENSG00000149636, ENSG00000143228, ENSG00000122952, ENSG00000089685, ENSG00000179041, ENSG00000121621, ENSG00000152253, ENSG00000137804, ENSG00000153044, ENSG00000164109, ENSG00000129810, ENSG00000164754, ENSG00000154839, ENSG00000136824, ENSG0000…	1031	71	8117	4.54634	4.80718e-15	4.00598e-16	2.7731e-15
GOTERM_BP_FAT	GO:0000070~mitotic sister chromatid segregation	19	1.4526	2.56796e-09	ENSG00000010292, ENSG00000136824, ENSG00000135476, ENSG00000138778, ENSG00000013573, ENSG00000113810, ENSG00000136982, ENSG00000080986, ENSG00000117650, ENSG00000126787, ENSG00000122952, ENSG00000112941, ENSG00000121152, ENSG00000146670, ENSG00000179041, ENSG00000109805, ENSG00000121621, ENSG00000137804, ENSG00000164109	1031	31	8117	4.82535	8.05565e-06	4.23983e-07	4.64705e-06
GOTERM_BP_FAT	GO:0000819~sister chromatid segregation	19	1.4526	5.17738e-09	ENSG00000010292, ENSG00000136824, ENSG00000135476, ENSG00000138778, ENSG00000013573, ENSG00000113810, ENSG00000136982, ENSG00000080986, ENSG00000117650, ENSG00000126787, ENSG00000122952, ENSG00000112941, ENSG00000121152, ENSG00000146670, ENSG00000179041, ENSG00000109805, ENSG00000121621, ENSG00000137804, ENSG00000164109	1031	32	8117	4.67456	1.62413e-05	8.12071e-07	9.36912e-06
GOTERM_BP_FAT	GO:0007076~mitotic chromosome condensation	8	0.611621	0.000230215	ENSG00000010292, ENSG00000136824, ENSG00000112941, ENSG00000121152, ENSG00000146670, ENSG00000113810, ENSG00000109805, ENSG00000137804	1031	12	8117	5.24863	0.51435	0.0159222	0.415784
GOTERM_BP_FAT	GO:0030261~chromosome condensation	9	0.688073	0.000883237	ENSG00000010292, ENSG00000136824, ENSG00000112941, ENSG00000131747, ENSG00000121152, ENSG00000146670, ENSG00000113810, ENSG00000109805, ENSG00000137804	1031	18	8117	3.93647	0.937459	0.0491499	1.58632
GOTERM_CC_FAT	GO:0000796~condensin complex	5	0.382263	0.00285794	ENSG00000010292, ENSG00000136824, ENSG00000121152, ENSG00000113810, ENSG00000109805	906	6	7303	6.71726	0.779345	0.0461259	4.06796
SP_PIR_KEYWORDS	dna condensation	5	0.382263	0.00491733	ENSG00000010292, ENSG00000136824, ENSG00000121152, ENSG00000113810, ENSG00000109805	1305	7	11119	6.08593	0.940958	0.0846256	6.98067
Annotation Cluster 8	Enrichment Score: 6.305007959152891
Category	Term	Count	%	PValue	Genes	List Total	Pop Hits	Pop Total	Fold Enrichment	Bonferroni	Benjamini	FDR
GOTERM_BP_FAT	GO:0051321~meiotic cell cycle	27	2.06422	2.97318e-07	ENSG00000182185, ENSG00000135476, ENSG00000196584, ENSG00000187741, ENSG00000112029, ENSG00000139618, ENSG00000071539, ENSG00000148773, ENSG00000152455, ENSG00000144554, ENSG00000020922, ENSG00000101224, ENSG00000174371, ENSG00000133101, ENSG00000166851, ENSG00000129810, ENSG00000132383, ENSG00000121211, ENSG00000164754, ENSG00000149554, ENSG00000085999, ENSG00000123975, ENSG00000101972, ENSG0000…	1031	72	8117	2.95235	0.000932251	3.73067e-05	0.000538033
GOTERM_BP_FAT	GO:0007126~meiosis	26	1.98777	6.39555e-07	ENSG00000182185, ENSG00000135476, ENSG00000196584, ENSG00000187741, ENSG00000112029, ENSG00000139618, ENSG00000071539, ENSG00000148773, ENSG00000152455, ENSG00000144554, ENSG00000020922, ENSG00000101224, ENSG00000174371, ENSG00000133101, ENSG00000166851, ENSG00000129810, ENSG00000132383, ENSG00000121211, ENSG00000164754, ENSG00000149554, ENSG00000085999, ENSG00000123975, ENSG00000101972, ENSG0000…	1031	70	8117	2.92423	0.00200427	7.16504e-05	0.00115735
GOTERM_BP_FAT	GO:0051327~M phase of meiotic cell cycle	26	1.98777	6.39555e-07	ENSG00000182185, ENSG00000135476, ENSG00000196584, ENSG00000187741, ENSG00000112029, ENSG00000139618, ENSG00000071539, ENSG00000148773, ENSG00000152455, ENSG00000144554, ENSG00000020922, ENSG00000101224, ENSG00000174371, ENSG00000133101, ENSG00000166851, ENSG00000129810, ENSG00000132383, ENSG00000121211, ENSG00000164754, ENSG00000149554, ENSG00000085999, ENSG00000123975, ENSG00000101972, ENSG0000…	1031	70	8117	2.92423	0.00200427	7.16504e-05	0.00115735
Annotation Cluster 9	Enrichment Score: 5.974799359163213
Category	Term	Count	%	PValue	Genes	List Total	Pop Hits	Pop Total	Fold Enrichment	Bonferroni	Benjamini	FDR
GOTERM_BP_FAT	GO:0007017~microtubule-based process	54	4.12844	3.59635e-08	ENSG00000112029, ENSG00000090889, ENSG00000197892, ENSG00000092036, ENSG00000122952, ENSG00000137822, ENSG00000156970, ENSG00000123416, ENSG00000188229, ENSG00000121621, ENSG00000152253, ENSG00000174799, ENSG00000118193, ENSG00000072864, ENSG00000112742, ENSG00000213066, ENSG00000134222, ENSG00000163808, ENSG00000142945, ENSG00000137177, ENSG00000147874, ENSG00000173786, ENSG00000186638, ENSG0000…	1031	196	8117	2.16908	0.000112811	5.37225e-06	6.50806e-05
GOTERM_BP_FAT	GO:0007051~spindle organization	19	1.4526	4.57019e-07	ENSG00000135476, ENSG00000112029, ENSG00000132341, ENSG00000080986, ENSG00000123975, ENSG00000180198, ENSG00000112742, ENSG00000092036, ENSG00000147874, ENSG00000122952, ENSG00000131351, ENSG00000156970, ENSG00000138160, ENSG00000152240, ENSG00000152253, ENSG00000137807, ENSG00000198901, ENSG00000013810, ENSG00000087586	1031	40	8117	3.73965	0.00143264	5.30975e-05	0.000827031
GOTERM_BP_FAT	GO:0000226~microtubule cytoskeleton organization	36	2.75229	7.34345e-07	ENSG00000135476, ENSG00000112029, ENSG00000139618, ENSG00000132341, ENSG00000092036, ENSG00000122952, ENSG00000131351, ENSG00000137822, ENSG00000181163, ENSG00000156970, ENSG00000138160, ENSG00000123416, ENSG00000115163, ENSG00000121621, ENSG00000152253, ENSG00000137804, ENSG00000174799, ENSG00000137807, ENSG00000013810, ENSG00000072864, ENSG00000180198, ENSG00000123975, ENSG00000080986, ENSG0000…	1031	118	8117	2.40191	0.00230099	7.94327e-05	0.00132888
GOTERM_BP_FAT	GO:0007010~cytoskeleton organization	63	4.81651	0.000104497	ENSG00000138193, ENSG00000111859, ENSG00000196923, ENSG00000139734, ENSG00000112029, ENSG00000122786, ENSG00000050405, ENSG00000092036, ENSG00000197321, ENSG00000073712, ENSG00000122952, ENSG00000137822, ENSG00000156970, ENSG00000123416, ENSG00000121621, ENSG00000152253, ENSG00000174799, ENSG00000117519, ENSG00000115935, ENSG00000163545, ENSG00000092820, ENSG00000137575, ENSG00000072864, ENSG0000…	1031	307	8117	1.61562	0.279511	0.00796387	0.188933
Annotation Cluster 10	Enrichment Score: 5.275074297649965
Category	Term	Count	%	PValue	Genes	List Total	Pop Hits	Pop Total	Fold Enrichment	Bonferroni	Benjamini	FDR
GOTERM_CC_FAT	GO:0015630~microtubule cytoskeleton	109	8.33333	6.20335e-13	ENSG00000107736, ENSG00000090889, ENSG00000064393, ENSG00000137822, ENSG00000156970, ENSG00000188229, ENSG00000121621, ENSG00000184445, ENSG00000122735, ENSG00000131747, ENSG00000072864, ENSG00000112742, ENSG00000134222, ENSG00000163808, ENSG00000126787, ENSG00000137177, ENSG00000134690, ENSG00000036672, ENSG00000101871, ENSG00000112118, ENSG00000213024, ENSG00000087586, ENSG00000135837, ENSG0000…	906	444	7303	1.97887	3.27509e-10	3.63899e-11	9.00069e-10
GOTERM_BP_FAT	GO:0007017~microtubule-based process	54	4.12844	3.59635e-08	ENSG00000112029, ENSG00000090889, ENSG00000197892, ENSG00000092036, ENSG00000122952, ENSG00000137822, ENSG00000156970, ENSG00000123416, ENSG00000188229, ENSG00000121621, ENSG00000152253, ENSG00000174799, ENSG00000118193, ENSG00000072864, ENSG00000112742, ENSG00000213066, ENSG00000134222, ENSG00000163808, ENSG00000142945, ENSG00000137177, ENSG00000147874, ENSG00000173786, ENSG00000186638, ENSG0000…	1031	196	8117	2.16908	0.000112811	5.37225e-06	6.50806e-05
UP_SEQ_FEATURE	domain:Kinesin-motor	16	1.22324	2.12405e-06	ENSG00000118193, ENSG00000138778, ENSG00000186185, ENSG00000090889, ENSG00000138182, ENSG00000079616, ENSG00000197892, ENSG00000163808, ENSG00000142945, ENSG00000137177, ENSG00000138160, ENSG00000186638, ENSG00000121621, ENSG00000112984, ENSG00000137807, ENSG00000166813	1304	34	11114	4.01083	0.00696588	0.00696588	0.00386408
INTERPRO	IPR001752:Kinesin, motor region	15	1.14679	7.59633e-06	ENSG00000118193, ENSG00000186185, ENSG00000138778, ENSG00000090889, ENSG00000079616, ENSG00000197892, ENSG00000163808, ENSG00000142945, ENSG00000137177, ENSG00000138160, ENSG00000186638, ENSG00000121621, ENSG00000112984, ENSG00000137807, ENSG00000166813	1160	33	9941	3.89538	0.0124183	0.00622853	0.0127617
INTERPRO	IPR019821:Kinesin, motor region, conserved site	15	1.14679	7.59633e-06	ENSG00000118193, ENSG00000186185, ENSG00000138778, ENSG00000090889, ENSG00000079616, ENSG00000197892, ENSG00000163808, ENSG00000142945, ENSG00000137177, ENSG00000138160, ENSG00000186638, ENSG00000121621, ENSG00000112984, ENSG00000137807, ENSG00000166813	1160	33	9941	3.89538	0.0124183	0.00622853	0.0127617
SMART	SM00129:KISc	15	1.14679	1.15003e-05	ENSG00000118193, ENSG00000186185, ENSG00000138778, ENSG00000090889, ENSG00000079616, ENSG00000197892, ENSG00000163808, ENSG00000142945, ENSG00000137177, ENSG00000138160, ENSG00000186638, ENSG00000121621, ENSG00000112984, ENSG00000137807, ENSG00000166813	673	33	5547	3.74645	0.00343269	0.00171782	0.0153589
SP_PIR_KEYWORDS	microtubule	42	3.21101	1.62375e-05	ENSG00000138778, ENSG00000186185, ENSG00000161800, ENSG00000090889, ENSG00000176014, ENSG00000149503, ENSG00000136811, ENSG00000197892, ENSG00000092036, ENSG00000187240, ENSG00000131351, ENSG00000137822, ENSG00000138160, ENSG00000136108, ENSG00000138771, ENSG00000123416, ENSG00000188229, ENSG00000121621, ENSG00000137804, ENSG00000137807, ENSG00000183137, ENSG00000154839, ENSG00000118193, ENSG0000…	1305	179	11119	1.99918	0.00927713	0.000582357	0.0238336
GOTERM_CC_FAT	GO:0005874~microtubule	46	3.51682	0.000103633	ENSG00000186185, ENSG00000138778, ENSG00000161800, ENSG00000090889, ENSG00000176014, ENSG00000149503, ENSG00000136811, ENSG00000197892, ENSG00000092036, ENSG00000170312, ENSG00000187240, ENSG00000089685, ENSG00000131351, ENSG00000137822, ENSG00000138160, ENSG00000136108, ENSG00000138771, ENSG00000123416, ENSG00000188229, ENSG00000121621, ENSG00000137804, ENSG00000137807, ENSG00000184445, ENSG0000…	906	208	7303	1.78266	0.0532508	0.00218645	0.150274
SP_PIR_KEYWORDS	motor protein	25	1.91131	0.000109836	ENSG00000186185, ENSG00000138778, ENSG00000095777, ENSG00000090889, ENSG00000128641, ENSG00000197892, ENSG00000187240, ENSG00000138160, ENSG00000157483, ENSG00000121621, ENSG00000101608, ENSG00000137807, ENSG00000133392, ENSG00000166813, ENSG00000145555, ENSG00000118193, ENSG00000122735, ENSG00000138182, ENSG00000079616, ENSG00000163808, ENSG00000142945, ENSG00000137177, ENSG00000185842, ENSG0000…	1305	92	11119	2.3153	0.0611029	0.0031475	0.161115
GOTERM_MF_FAT	GO:0003777~microtubule motor activity	19	1.4526	0.000189832	ENSG00000118193, ENSG00000138778, ENSG00000186185, ENSG00000090889, ENSG00000138182, ENSG00000079616, ENSG00000197892, ENSG00000163808, ENSG00000142945, ENSG00000187240, ENSG00000113971, ENSG00000137177, ENSG00000185842, ENSG00000138160, ENSG00000186638, ENSG00000121621, ENSG00000112984, ENSG00000137807, ENSG00000166813	943	60	7713	2.59008	0.176989	0.0475299	0.300487
GOTERM_MF_FAT	GO:0003774~motor activity	26	1.98777	0.000359501	ENSG00000138778, ENSG00000186185, ENSG00000095777, ENSG00000090889, ENSG00000128641, ENSG00000197892, ENSG00000187240, ENSG00000138160, ENSG00000157483, ENSG00000121621, ENSG00000101608, ENSG00000137807, ENSG00000133392, ENSG00000166813, ENSG00000145555, ENSG00000118193, ENSG00000122735, ENSG00000138182, ENSG00000079616, ENSG00000163808, ENSG00000142945, ENSG00000113971, ENSG00000137177, ENSG0000…	943	101	7713	2.10554	0.308515	0.0711266	0.56834
GOTERM_BP_FAT	GO:0007018~microtubule-based movement	22	1.68196	0.00126098	ENSG00000118193, ENSG00000138778, ENSG00000186185, ENSG00000090889, ENSG00000176014, ENSG00000138182, ENSG00000072864, ENSG00000079616, ENSG00000197892, ENSG00000163808, ENSG00000142945, ENSG00000187240, ENSG00000137177, ENSG00000185842, ENSG00000138160, ENSG00000186638, ENSG00000123416, ENSG00000188229, ENSG00000121621, ENSG00000112984, ENSG00000137807, ENSG00000166813	1031	83	8117	2.0868	0.980902	0.0618465	2.25747
Annotation Cluster 11	Enrichment Score: 4.977890099866497
Category	Term	Count	%	PValue	Genes	List Total	Pop Hits	Pop Total	Fold Enrichment	Bonferroni	Benjamini	FDR
GOTERM_BP_FAT	GO:0051726~regulation of cell cycle	69	5.27523	3.02675e-10	ENSG00000142731, ENSG00000112029, ENSG00000164045, ENSG00000117724, ENSG00000136492, ENSG00000122952, ENSG00000181773, ENSG00000156970, ENSG00000221829, ENSG00000111602, ENSG00000116478, ENSG00000117318, ENSG00000197299, ENSG00000164109, ENSG00000135446, ENSG00000184445, ENSG00000145386, ENSG00000123374, ENSG00000101773, ENSG00000185513, ENSG00000112742, ENSG00000126787, ENSG00000137337, ENSG0000…	1031	250	8117	2.17293	9.4949e-07	5.27494e-08	5.47728e-07
GOTERM_BP_FAT	GO:0000075~cell cycle checkpoint	28	2.14067	1.89441e-07	ENSG00000138778, ENSG00000117724, ENSG00000185088, ENSG00000167513, ENSG00000175305, ENSG00000170312, ENSG00000136492, ENSG00000122952, ENSG00000089685, ENSG00000156970, ENSG00000221829, ENSG00000091436, ENSG00000110092, ENSG00000197299, ENSG00000164109, ENSG00000184445, ENSG00000145386, ENSG00000183765, ENSG00000101773, ENSG00000169679, ENSG00000149554, ENSG00000093009, ENSG00000112742, ENSG0000…	1031	75	8117	2.93923	0.000594099	2.47612e-05	0.000342817
GOTERM_BP_FAT	GO:0010564~regulation of cell cycle process	28	2.14067	1.91074e-06	ENSG00000142731, ENSG00000135476, ENSG00000138778, ENSG00000112029, ENSG00000117724, ENSG00000139618, ENSG00000167513, ENSG00000089685, ENSG00000181773, ENSG00000181163, ENSG00000111602, ENSG00000137804, ENSG00000164109, ENSG00000184445, ENSG00000185513, ENSG00000169679, ENSG00000138182, ENSG00000180447, ENSG00000180198, ENSG00000112742, ENSG00000117650, ENSG00000126787, ENSG00000012048, ENSG0000…	1031	83	8117	2.65593	0.00597606	0.000187295	0.00345767
GOTERM_BP_FAT	GO:0007346~regulation of mitotic cell cycle	32	2.44648	1.82127e-05	ENSG00000135476, ENSG00000138778, ENSG00000112029, ENSG00000117724, ENSG00000139618, ENSG00000167967, ENSG00000185088, ENSG00000167513, ENSG00000170312, ENSG00000122952, ENSG00000089685, ENSG00000156970, ENSG00000110092, ENSG00000137804, ENSG00000164109, ENSG00000184445, ENSG00000123374, ENSG00000145386, ENSG00000185513, ENSG00000169679, ENSG00000138182, ENSG00000180447, ENSG00000180198, ENSG0000…	1031	113	8117	2.2295	0.0555322	0.00163106	0.0329531
GOTERM_BP_FAT	GO:0007088~regulation of mitosis	14	1.07034	0.000905237	ENSG00000135476, ENSG00000138778, ENSG00000100462, ENSG00000158402, ENSG00000117724, ENSG00000185513, ENSG00000138182, ENSG00000169679, ENSG00000180198, ENSG00000112742, ENSG00000137804, ENSG00000117650, ENSG00000164109, ENSG00000126787	1031	40	8117	2.75553	0.941634	0.049467	1.62553
GOTERM_BP_FAT	GO:0051783~regulation of nuclear division	14	1.07034	0.000905237	ENSG00000135476, ENSG00000138778, ENSG00000100462, ENSG00000158402, ENSG00000117724, ENSG00000185513, ENSG00000138182, ENSG00000169679, ENSG00000180198, ENSG00000112742, ENSG00000137804, ENSG00000117650, ENSG00000164109, ENSG00000126787	1031	40	8117	2.75553	0.941634	0.049467	1.62553
GOTERM_BP_FAT	GO:0033043~regulation of organelle organization	33	2.52294	0.00873413	ENSG00000142731, ENSG00000135476, ENSG00000138778, ENSG00000117724, ENSG00000050405, ENSG00000181163, ENSG00000109819, ENSG00000149798, ENSG00000119335, ENSG00000133627, ENSG00000137804, ENSG00000164109, ENSG00000067560, ENSG00000154839, ENSG00000185513, ENSG00000042493, ENSG00000169679, ENSG00000138182, ENSG00000180198, ENSG00000112742, ENSG00000137710, ENSG00000120896, ENSG00000134222, ENSG0000…	1031	165	8117	1.57459	1	0.256143	14.679
Annotation Cluster 12	Enrichment Score: 4.970154269006871
Category	Term	Count	%	PValue	Genes	List Total	Pop Hits	Pop Total	Fold Enrichment	Bonferroni	Benjamini	FDR
GOTERM_BP_FAT	GO:0006323~DNA packaging	30	2.29358	2.84292e-10	ENSG00000073111, ENSG00000010292, ENSG00000181218, ENSG00000123485, ENSG00000187109, ENSG00000105011, ENSG00000168298, ENSG00000181163, ENSG00000197061, ENSG00000167670, ENSG00000119335, ENSG00000164104, ENSG00000115163, ENSG00000137804, ENSG00000184357, ENSG00000136824, ENSG00000131747, ENSG00000113810, ENSG00000164032, ENSG00000128708, ENSG00000112941, ENSG00000184260, ENSG00000146670, ENSG0000…	1031	66	8117	3.57861	8.91824e-07	5.24603e-08	5.14463e-07
GOTERM_BP_FAT	GO:0065004~protein-DNA complex assembly	22	1.68196	3.66533e-08	ENSG00000073111, ENSG00000138778, ENSG00000181218, ENSG00000117724, ENSG00000123485, ENSG00000164032, ENSG00000187109, ENSG00000105011, ENSG00000168298, ENSG00000184260, ENSG00000181163, ENSG00000197061, ENSG00000167670, ENSG00000119335, ENSG00000164104, ENSG00000115163, ENSG00000187837, ENSG00000184357, ENSG00000119969, ENSG00000127483, ENSG00000159259, ENSG00000124575	1031	46	8117	3.76532	0.000114975	5.22641e-06	6.63287e-05
GOTERM_BP_FAT	GO:0031497~chromatin assembly	20	1.52905	3.11569e-07	ENSG00000073111, ENSG00000181218, ENSG00000123485, ENSG00000164032, ENSG00000187109, ENSG00000105011, ENSG00000168298, ENSG00000184260, ENSG00000181163, ENSG00000197061, ENSG00000167670, ENSG00000119335, ENSG00000164104, ENSG00000115163, ENSG00000187837, ENSG00000184357, ENSG00000119969, ENSG00000127483, ENSG00000159259, ENSG00000124575	1031	43	8117	3.66183	0.000976914	3.75913e-05	0.000563822
GOTERM_BP_FAT	GO:0006334~nucleosome assembly	19	1.4526	4.57019e-07	ENSG00000073111, ENSG00000181218, ENSG00000123485, ENSG00000164032, ENSG00000187109, ENSG00000105011, ENSG00000168298, ENSG00000184260, ENSG00000181163, ENSG00000197061, ENSG00000167670, ENSG00000119335, ENSG00000164104, ENSG00000115163, ENSG00000187837, ENSG00000184357, ENSG00000127483, ENSG00000159259, ENSG00000124575	1031	40	8117	3.73965	0.00143264	5.30975e-05	0.000827031
GOTERM_CC_FAT	GO:0032993~protein-DNA complex	19	1.4526	7.71282e-07	ENSG00000181218, ENSG00000117748, ENSG00000164032, ENSG00000196419, ENSG00000014138, ENSG00000106399, ENSG00000101868, ENSG00000168298, ENSG00000184260, ENSG00000197061, ENSG00000077514, ENSG00000115163, ENSG00000187837, ENSG00000184357, ENSG00000112118, ENSG00000127483, ENSG00000132383, ENSG00000198056, ENSG00000124575	906	42	7303	3.64651	0.000407154	2.2624e-05	0.00111918
GOTERM_BP_FAT	GO:0034728~nucleosome organization	20	1.52905	1.6443e-06	ENSG00000073111, ENSG00000181218, ENSG00000123485, ENSG00000164032, ENSG00000187109, ENSG00000105011, ENSG00000132780, ENSG00000168298, ENSG00000184260, ENSG00000181163, ENSG00000197061, ENSG00000167670, ENSG00000119335, ENSG00000164104, ENSG00000115163, ENSG00000187837, ENSG00000184357, ENSG00000127483, ENSG00000159259, ENSG00000124575	1031	47	8117	3.35019	0.00514488	0.000171924	0.00297552
GOTERM_BP_FAT	GO:0006333~chromatin assembly or disassembly	23	1.75841	0.000188436	ENSG00000073111, ENSG00000181218, ENSG00000171316, ENSG00000123485, ENSG00000164032, ENSG00000187109, ENSG00000105011, ENSG00000152455, ENSG00000168298, ENSG00000184260, ENSG00000149929, ENSG00000181163, ENSG00000197061, ENSG00000167670, ENSG00000119335, ENSG00000164104, ENSG00000115163, ENSG00000187837, ENSG00000184357, ENSG00000119969, ENSG00000127483, ENSG00000159259, ENSG00000124575	1031	78	8117	2.32151	0.446326	0.013346	0.34045
GOTERM_CC_FAT	GO:0000786~nucleosome	10	0.764526	0.000730379	ENSG00000181218, ENSG00000184260, ENSG00000168298, ENSG00000197061, ENSG00000164032, ENSG00000115163, ENSG00000187837, ENSG00000184357, ENSG00000127483, ENSG00000124575	906	22	7303	3.66396	0.320081	0.0136834	1.05462
GOTERM_BP_FAT	GO:0006325~chromatin organization	55	4.20489	0.00109251	ENSG00000171316, ENSG00000071243, ENSG00000109685, ENSG00000123485, ENSG00000105011, ENSG00000114166, ENSG00000149929, ENSG00000167670, ENSG00000116478, ENSG00000164104, ENSG00000184357, ENSG00000189403, ENSG00000185513, ENSG00000164032, ENSG00000128708, ENSG00000110693, ENSG00000080839, ENSG00000136518, ENSG00000143258, ENSG00000184260, ENSG00000112983, ENSG00000167468, ENSG00000187837, ENSG0000…	1031	282	8117	1.5355	0.967583	0.0574083	1.95868
GOTERM_BP_FAT	GO:0034621~cellular macromolecular complex subunit organization	45	3.44037	0.0221697	ENSG00000073111, ENSG00000181218, ENSG00000138778, ENSG00000112029, ENSG00000117724, ENSG00000123485, ENSG00000176014, ENSG00000187109, ENSG00000110713, ENSG00000105011, ENSG00000058804, ENSG00000168298, ENSG00000181163, ENSG00000143977, ENSG00000197061, ENSG00000167670, ENSG00000119335, ENSG00000123416, ENSG00000188229, ENSG00000164104, ENSG00000121621, ENSG00000115163, ENSG00000153044, ENSG0000…	1031	257	8117	1.37853	1	0.43812	33.3492
GOTERM_BP_FAT	GO:0034622~cellular macromolecular complex assembly	39	2.98165	0.0339504	ENSG00000073111, ENSG00000181218, ENSG00000138778, ENSG00000112029, ENSG00000117724, ENSG00000123485, ENSG00000176014, ENSG00000187109, ENSG00000110713, ENSG00000105011, ENSG00000058804, ENSG00000168298, ENSG00000181163, ENSG00000143977, ENSG00000197061, ENSG00000167670, ENSG00000119335, ENSG00000123416, ENSG00000188229, ENSG00000164104, ENSG00000115163, ENSG00000184357, ENSG00000133392, ENSG0000…	1031	223	8117	1.37688	1	0.53881	46.4764
Annotation Cluster 13	Enrichment Score: 4.763847544325184
Category	Term	Count	%	PValue	Genes	List Total	Pop Hits	Pop Total	Fold Enrichment	Bonferroni	Benjamini	FDR
SP_PIR_KEYWORDS	cell cycle control	19	1.4526	2.61587e-11	ENSG00000118971, ENSG00000164045, ENSG00000123975, ENSG00000134057, ENSG00000148773, ENSG00000123080, ENSG00000170312, ENSG00000105810, ENSG00000158402, ENSG00000173207, ENSG00000100526, ENSG00000110092, ENSG00000145604, ENSG00000101224, ENSG00000166483, ENSG00000135446, ENSG00000145386, ENSG00000113328, ENSG00000123374	1305	27	11119	5.99577	1.50151e-08	1.66834e-09	3.84e-08
BIOCARTA	h_cellcyclePathway:Cyclins and Cell Cycle Regulation	11	0.840979	0.000296401	ENSG00000170312, ENSG00000105810, ENSG00000118971, ENSG00000164045, ENSG00000110092, ENSG00000134057, ENSG00000080839, ENSG00000133101, ENSG00000123080, ENSG00000135446, ENSG00000123374	145	20	920	3.48966	0.0533655	0.0533655	0.366143
SP_PIR_KEYWORDS	cyclin	12	0.917431	0.00329864	ENSG00000105810, ENSG00000118971, ENSG00000110092, ENSG00000162063, ENSG00000134057, ENSG00000133101, ENSG00000123080, ENSG00000135446, ENSG00000157456, ENSG00000175305, ENSG00000145386, ENSG00000113328	1305	38	11119	2.69062	0.849915	0.0678324	4.73456
KEGG_PATHWAY	hsa04115:p53 signaling pathway	16	1.22324	0.00344175	ENSG00000118971, ENSG00000149554, ENSG00000164305, ENSG00000134057, ENSG00000175305, ENSG00000170312, ENSG00000105810, ENSG00000075218, ENSG00000141510, ENSG00000110092, ENSG00000085117, ENSG00000135446, ENSG00000157456, ENSG00000113328, ENSG00000183765, ENSG00000123374	394	54	2952	2.21997	0.431879	0.106925	4.09441
Annotation Cluster 14	Enrichment Score: 4.138731280886786
Category	Term	Count	%	PValue	Genes	List Total	Pop Hits	Pop Total	Fold Enrichment	Bonferroni	Benjamini	FDR
KEGG_PATHWAY	hsa03030:DNA replication	23	1.75841	5.71391e-13	ENSG00000073111, ENSG00000117748, ENSG00000106628, ENSG00000014138, ENSG00000168496, ENSG00000049541, ENSG00000106399, ENSG00000101868, ENSG00000133119, ENSG00000138346, ENSG00000100297, ENSG00000163918, ENSG00000035928, ENSG00000076003, ENSG00000077514, ENSG00000111445, ENSG00000112118, ENSG00000104738, ENSG00000166508, ENSG00000132383, ENSG00000198056, ENSG00000104889, ENSG00000100479	394	32	2952	5.38515	9.37148e-11	9.37148e-11	6.92901e-10
GOTERM_CC_FAT	GO:0005657~replication fork	16	1.22324	3.20076e-07	ENSG00000117748, ENSG00000149554, ENSG00000014138, ENSG00000049541, ENSG00000106399, ENSG00000101868, ENSG00000133119, ENSG00000141510, ENSG00000163918, ENSG00000035928, ENSG00000077514, ENSG00000197299, ENSG00000111445, ENSG00000112118, ENSG00000132383, ENSG00000198056	906	29	7303	4.44729	0.000168986	1.05624e-05	0.000464451
GOTERM_BP_FAT	GO:0006297~nucleotide-excision repair, DNA gap filling	11	0.840979	1.70663e-06	ENSG00000133119, ENSG00000117748, ENSG00000035928, ENSG00000163918, ENSG00000077514, ENSG00000106628, ENSG00000111445, ENSG00000049541, ENSG00000132383, ENSG00000106399, ENSG00000100479	1031	15	8117	5.77349	0.00533939	0.000172685	0.00308832
KEGG_PATHWAY	hsa03430:Mismatch repair	11	0.840979	8.33897e-05	ENSG00000133119, ENSG00000117748, ENSG00000035928, ENSG00000163918, ENSG00000077514, ENSG00000174371, ENSG00000106628, ENSG00000111445, ENSG00000049541, ENSG00000132383, ENSG00000106399	394	20	2952	4.12081	0.0135834	0.00454845	0.10107
GOTERM_MF_FAT	GO:0003689~DNA clamp loader activity	5	0.382263	0.000998556	ENSG00000133119, ENSG00000035928, ENSG00000163918, ENSG00000111445, ENSG00000049541	943	5	7713	8.17922	0.641214	0.12026	1.57117
GOTERM_MF_FAT	GO:0033170~protein-DNA loading ATPase activity	5	0.382263	0.000998556	ENSG00000133119, ENSG00000035928, ENSG00000163918, ENSG00000111445, ENSG00000049541	943	5	7713	8.17922	0.641214	0.12026	1.57117
GOTERM_BP_FAT	GO:0006289~nucleotide-excision repair	15	1.14679	0.00120601	ENSG00000109674, ENSG00000117748, ENSG00000139618, ENSG00000106628, ENSG00000049541, ENSG00000106399, ENSG00000133119, ENSG00000141510, ENSG00000163918, ENSG00000035928, ENSG00000077514, ENSG00000111445, ENSG00000198924, ENSG00000132383, ENSG00000100479	1031	46	8117	2.56726	0.977303	0.0611433	2.16008
GOTERM_CC_FAT	GO:0005663~DNA replication factor C complex	5	0.382263	0.00285794	ENSG00000133119, ENSG00000035928, ENSG00000163918, ENSG00000111445, ENSG00000049541	906	6	7303	6.71726	0.779345	0.0461259	4.06796
PIR_SUPERFAMILY	PIRSF004274:phage T4 DNA polymerase accessory protein 44	4	0.30581	0.00682781	ENSG00000133119, ENSG00000163918, ENSG00000111445, ENSG00000049541	503	4	4060	8.07157	0.976264	0.845936	9.50548
KEGG_PATHWAY	hsa03420:Nucleotide excision repair	11	0.840979	0.012974	ENSG00000133119, ENSG00000117748, ENSG00000035928, ENSG00000163918, ENSG00000077514, ENSG00000106628, ENSG00000111445, ENSG00000049541, ENSG00000132383, ENSG00000106399, ENSG00000100479	394	35	2952	2.35475	0.88254	0.234869	14.6449
INTERPRO	IPR013748:Replication factor C	3	0.229358	0.0375849	ENSG00000163918, ENSG00000111445, ENSG00000049541	1160	3	9941	8.56983	1	0.957188	47.4617
Annotation Cluster 15	Enrichment Score: 4.065281658927768
Category	Term	Count	%	PValue	Genes	List Total	Pop Hits	Pop Total	Fold Enrichment	Bonferroni	Benjamini	FDR
GOTERM_BP_FAT	GO:0000075~cell cycle checkpoint	28	2.14067	1.89441e-07	ENSG00000138778, ENSG00000117724, ENSG00000185088, ENSG00000167513, ENSG00000175305, ENSG00000170312, ENSG00000136492, ENSG00000122952, ENSG00000089685, ENSG00000156970, ENSG00000221829, ENSG00000091436, ENSG00000110092, ENSG00000197299, ENSG00000164109, ENSG00000184445, ENSG00000145386, ENSG00000183765, ENSG00000101773, ENSG00000169679, ENSG00000149554, ENSG00000093009, ENSG00000112742, ENSG0000…	1031	75	8117	2.93923	0.000594099	2.47612e-05	0.000342817
GOTERM_BP_FAT	GO:0031570~DNA integrity checkpoint	16	1.22324	0.000112618	ENSG00000149554, ENSG00000093009, ENSG00000185088, ENSG00000167513, ENSG00000012048, ENSG00000170312, ENSG00000137337, ENSG00000136492, ENSG00000075218, ENSG00000141510, ENSG00000091436, ENSG00000110092, ENSG00000197299, ENSG00000075131, ENSG00000183765, ENSG00000145386	1031	42	8117	2.99921	0.297636	0.00818271	0.203601
GOTERM_BP_FAT	GO:0000077~DNA damage checkpoint	14	1.07034	0.000689931	ENSG00000012048, ENSG00000136492, ENSG00000137337, ENSG00000170312, ENSG00000075218, ENSG00000149554, ENSG00000141510, ENSG00000091436, ENSG00000110092, ENSG00000197299, ENSG00000185088, ENSG00000145386, ENSG00000183765, ENSG00000075131	1031	39	8117	2.82618	0.885257	0.0407809	1.24118
GOTERM_BP_FAT	GO:0042770~DNA damage response, signal transduction	17	1.29969	0.00372378	ENSG00000181026, ENSG00000149554, ENSG00000139618, ENSG00000064393, ENSG00000185088, ENSG00000012048, ENSG00000170312, ENSG00000137337, ENSG00000136492, ENSG00000075218, ENSG00000141510, ENSG00000091436, ENSG00000110092, ENSG00000197299, ENSG00000075131, ENSG00000183765, ENSG00000145386	1031	62	8117	2.15871	0.999992	0.146281	6.52839
Annotation Cluster 16	Enrichment Score: 3.866125444686153
Category	Term	Count	%	PValue	Genes	List Total	Pop Hits	Pop Total	Fold Enrichment	Bonferroni	Benjamini	FDR
INTERPRO	IPR018525:DNA-dependent ATPase MCM, conserved site	8	0.611621	2.07124e-06	ENSG00000073111, ENSG00000100297, ENSG00000076003, ENSG00000125885, ENSG00000111877, ENSG00000104738, ENSG00000112118, ENSG00000166508	1160	8	9941	8.56983	0.00340139	0.00340139	0.00347978
UP_SEQ_FEATURE	domain:MCM	8	0.611621	2.15599e-06	ENSG00000073111, ENSG00000100297, ENSG00000076003, ENSG00000125885, ENSG00000111877, ENSG00000104738, ENSG00000112118, ENSG00000166508	1304	8	11114	8.52301	0.00707026	0.0035414	0.00392218
INTERPRO	IPR001208:DNA-dependent ATPase MCM	8	0.611621	8.37643e-06	ENSG00000073111, ENSG00000100297, ENSG00000076003, ENSG00000125885, ENSG00000111877, ENSG00000104738, ENSG00000112118, ENSG00000166508	1160	9	9941	7.61762	0.0136848	0.00458256	0.0140721
SMART	SM00350:MCM	8	0.611621	1.07451e-05	ENSG00000073111, ENSG00000100297, ENSG00000076003, ENSG00000125885, ENSG00000111877, ENSG00000104738, ENSG00000112118, ENSG00000166508	673	9	5547	7.3264	0.00320766	0.00320766	0.0143505
GOTERM_BP_FAT	GO:0006270~DNA replication initiation	10	0.764526	2.01679e-05	ENSG00000073111, ENSG00000101868, ENSG00000100297, ENSG00000076003, ENSG00000085840, ENSG00000093009, ENSG00000104738, ENSG00000112118, ENSG00000166508, ENSG00000175305	1031	15	8117	5.24863	0.0613075	0.00175588	0.0364901
INTERPRO	IPR012340:Nucleic acid-binding, OB-fold	16	1.22324	0.000105425	ENSG00000073111, ENSG00000117748, ENSG00000161016, ENSG00000107960, ENSG00000115866, ENSG00000111877, ENSG00000106399, ENSG00000100297, ENSG00000076003, ENSG00000125885, ENSG00000060138, ENSG00000112118, ENSG00000104738, ENSG00000117593, ENSG00000166508, ENSG00000132383	1160	45	9941	3.04705	0.159227	0.042432	0.176976
GOTERM_BP_FAT	GO:0006268~DNA unwinding during replication	6	0.458716	0.017435	ENSG00000073111, ENSG00000189403, ENSG00000076003, ENSG00000164104, ENSG00000104738, ENSG00000166508	1031	13	8117	3.63366	1	0.38632	27.2609
GOTERM_BP_FAT	GO:0032392~DNA geometric change	6	0.458716	0.0327981	ENSG00000073111, ENSG00000189403, ENSG00000076003, ENSG00000164104, ENSG00000104738, ENSG00000166508	1031	15	8117	3.14918	1	0.531427	45.3092
GOTERM_BP_FAT	GO:0032508~DNA duplex unwinding	6	0.458716	0.0327981	ENSG00000073111, ENSG00000189403, ENSG00000076003, ENSG00000164104, ENSG00000104738, ENSG00000166508	1031	15	8117	3.14918	1	0.531427	45.3092
Annotation Cluster 17	Enrichment Score: 3.4154203632053846
Category	Term	Count	%	PValue	Genes	List Total	Pop Hits	Pop Total	Fold Enrichment	Bonferroni	Benjamini	FDR
GOTERM_BP_FAT	GO:0051329~interphase of mitotic cell cycle	26	1.98777	7.5736e-05	ENSG00000164045, ENSG00000118971, ENSG00000117724, ENSG00000169016, ENSG00000134057, ENSG00000101868, ENSG00000089685, ENSG00000110092, ENSG00000145604, ENSG00000197299, ENSG00000135446, ENSG00000123374, ENSG00000101773, ENSG00000013573, ENSG00000149554, ENSG00000180198, ENSG00000123080, ENSG00000172201, ENSG00000105810, ENSG00000158402, ENSG00000137193, ENSG00000182481, ENSG00000146670, ENSG0000…	1031	89	8117	2.29996	0.211476	0.00607361	0.136965
GOTERM_BP_FAT	GO:0051325~interphase	26	1.98777	0.000112446	ENSG00000164045, ENSG00000118971, ENSG00000117724, ENSG00000169016, ENSG00000134057, ENSG00000101868, ENSG00000089685, ENSG00000110092, ENSG00000145604, ENSG00000197299, ENSG00000135446, ENSG00000123374, ENSG00000101773, ENSG00000013573, ENSG00000149554, ENSG00000180198, ENSG00000123080, ENSG00000172201, ENSG00000105810, ENSG00000158402, ENSG00000137193, ENSG00000182481, ENSG00000146670, ENSG0000…	1031	91	8117	2.24941	0.297256	0.00836394	0.20329
GOTERM_BP_FAT	GO:0000082~G1/S transition of mitotic cell cycle	14	1.07034	0.00666028	ENSG00000101773, ENSG00000164045, ENSG00000118971, ENSG00000169016, ENSG00000180198, ENSG00000172201, ENSG00000123080, ENSG00000137193, ENSG00000146670, ENSG00000100526, ENSG00000110092, ENSG00000145604, ENSG00000006634, ENSG00000135446	1031	49	8117	2.24941	1	0.209857	11.3904
Annotation Cluster 18	Enrichment Score: 2.9225897128949336
Category	Term	Count	%	PValue	Genes	List Total	Pop Hits	Pop Total	Fold Enrichment	Bonferroni	Benjamini	FDR
INTERPRO	IPR004367:Cyclin, C-terminal	8	0.611621	0.000133921	ENSG00000118971, ENSG00000110092, ENSG00000162063, ENSG00000134057, ENSG00000133101, ENSG00000157456, ENSG00000175305, ENSG00000145386	1160	12	9941	5.71322	0.197734	0.0431063	0.22476
INTERPRO	IPR014400:Cyclin, A/B/D/E	7	0.535168	0.000152417	ENSG00000118971, ENSG00000110092, ENSG00000134057, ENSG00000133101, ENSG00000157456, ENSG00000175305, ENSG00000145386	1160	9	9941	6.66542	0.221779	0.0409296	0.255764
PIR_SUPERFAMILY	PIRSF001771:cyclin, A/B/D/E types	7	0.535168	0.000209859	ENSG00000118971, ENSG00000110092, ENSG00000134057, ENSG00000133101, ENSG00000157456, ENSG00000175305, ENSG00000145386	503	9	4060	6.27789	0.108273	0.108273	0.305508
PIR_SUPERFAMILY	PIRSF001771:Cyclin_A_B_D_E	7	0.535168	0.000209859	ENSG00000118971, ENSG00000110092, ENSG00000134057, ENSG00000133101, ENSG00000157456, ENSG00000175305, ENSG00000145386	503	9	4060	6.27789	0.108273	0.108273	0.305508
SP_PIR_KEYWORDS	cyclin	12	0.917431	0.00329864	ENSG00000105810, ENSG00000118971, ENSG00000110092, ENSG00000162063, ENSG00000134057, ENSG00000133101, ENSG00000123080, ENSG00000135446, ENSG00000157456, ENSG00000175305, ENSG00000145386, ENSG00000113328	1305	38	11119	2.69062	0.849915	0.0678324	4.73456
INTERPRO	IPR013763:Cyclin-related	10	0.764526	0.00440969	ENSG00000118971, ENSG00000110092, ENSG00000162063, ENSG00000134057, ENSG00000080839, ENSG00000133101, ENSG00000157456, ENSG00000175305, ENSG00000145386, ENSG00000113328	1160	29	9941	2.95511	0.999304	0.554151	7.15604
INTERPRO	IPR006671:Cyclin, N-terminal	9	0.688073	0.00582822	ENSG00000118971, ENSG00000110092, ENSG00000162063, ENSG00000134057, ENSG00000133101, ENSG00000157456, ENSG00000175305, ENSG00000145386, ENSG00000113328	1160	25	9941	3.08514	0.999933	0.582777	9.3537
INTERPRO	IPR006670:Cyclin	10	0.764526	0.0071676	ENSG00000118971, ENSG00000110092, ENSG00000162063, ENSG00000134057, ENSG00000080839, ENSG00000133101, ENSG00000157456, ENSG00000175305, ENSG00000145386, ENSG00000113328	1160	31	9941	2.76446	0.999993	0.597574	11.3838
SMART	SM00385:CYCLIN	10	0.764526	0.00910547	ENSG00000118971, ENSG00000110092, ENSG00000162063, ENSG00000134057, ENSG00000080839, ENSG00000133101, ENSG00000157456, ENSG00000175305, ENSG00000145386, ENSG00000113328	673	31	5547	2.65877	0.935106	0.49528	11.5004
Annotation Cluster 19	Enrichment Score: 2.4150065702554193
Category	Term	Count	%	PValue	Genes	List Total	Pop Hits	Pop Total	Fold Enrichment	Bonferroni	Benjamini	FDR
GOTERM_BP_FAT	GO:0007389~pattern specification process	32	2.44648	0.000479255	ENSG00000106571, ENSG00000138795, ENSG00000138696, ENSG00000112210, ENSG00000064393, ENSG00000107779, ENSG00000074047, ENSG00000004975, ENSG00000070018, ENSG00000148516, ENSG00000187240, ENSG00000078246, ENSG00000138771, ENSG00000142871, ENSG00000128602, ENSG00000177426, ENSG00000104332, ENSG00000179981, ENSG00000180447, ENSG00000164651, ENSG00000170370, ENSG00000114315, ENSG00000101144, ENSG0000…	1031	133	8117	1.89424	0.777713	0.0308432	0.86373
GOTERM_BP_FAT	GO:0003002~regionalization	24	1.83486	0.00123805	ENSG00000106571, ENSG00000138795, ENSG00000177426, ENSG00000112210, ENSG00000138696, ENSG00000104332, ENSG00000064393, ENSG00000180447, ENSG00000179981, ENSG00000074047, ENSG00000107779, ENSG00000164651, ENSG00000070018, ENSG00000170370, ENSG00000004975, ENSG00000114315, ENSG00000187240, ENSG00000152284, ENSG00000078246, ENSG00000145423, ENSG00000106689, ENSG00000128602, ENSG00000167081, ENSG0000…	1031	94	8117	2.01011	0.979476	0.0617208	2.21686
GOTERM_BP_FAT	GO:0009952~anterior/posterior pattern formation	13	0.993884	0.0958682	ENSG00000106571, ENSG00000152284, ENSG00000138795, ENSG00000104332, ENSG00000145423, ENSG00000064393, ENSG00000179981, ENSG00000107779, ENSG00000170370, ENSG00000070018, ENSG00000114315, ENSG00000167081, ENSG00000148400	1031	63	8117	1.62457	1	0.803997	83.858
Annotation Cluster 20	Enrichment Score: 2.408759544555899
Category	Term	Count	%	PValue	Genes	List Total	Pop Hits	Pop Total	Fold Enrichment	Bonferroni	Benjamini	FDR
GOTERM_BP_FAT	GO:0022616~DNA strand elongation	5	0.382263	0.00115932	ENSG00000101868, ENSG00000133119, ENSG00000138346, ENSG00000163918, ENSG00000168496	1031	5	8117	7.87294	0.973718	0.0598126	2.07727
GOTERM_BP_FAT	GO:0006271~DNA strand elongation during DNA replication	5	0.382263	0.00115932	ENSG00000101868, ENSG00000133119, ENSG00000138346, ENSG00000163918, ENSG00000168496	1031	5	8117	7.87294	0.973718	0.0598126	2.07727
GOTERM_BP_FAT	GO:0006273~lagging strand elongation	3	0.229358	0.0441893	ENSG00000101868, ENSG00000138346, ENSG00000168496	1031	3	8117	7.87294	1	0.601734	55.8628
Annotation Cluster 21	Enrichment Score: 2.405929388988149
Category	Term	Count	%	PValue	Genes	List Total	Pop Hits	Pop Total	Fold Enrichment	Bonferroni	Benjamini	FDR
GOTERM_BP_FAT	GO:0043009~chordate embryonic development	42	3.21101	0.00149405	ENSG00000142731, ENSG00000106571, ENSG00000196584, ENSG00000171316, ENSG00000138795, ENSG00000139618, ENSG00000074047, ENSG00000004975, ENSG00000148516, ENSG00000033170, ENSG00000078246, ENSG00000138771, ENSG00000157483, ENSG00000128602, ENSG00000060138, ENSG00000060718, ENSG00000104067, ENSG00000132383, ENSG00000157456, ENSG00000101773, ENSG00000043355, ENSG00000177426, ENSG00000104332, ENSG0000…	1031	203	8117	1.62888	0.990817	0.0706657	2.66943
GOTERM_BP_FAT	GO:0009792~embryonic development ending in birth or egg hatching	42	3.21101	0.00149405	ENSG00000142731, ENSG00000106571, ENSG00000196584, ENSG00000171316, ENSG00000138795, ENSG00000139618, ENSG00000074047, ENSG00000004975, ENSG00000148516, ENSG00000033170, ENSG00000078246, ENSG00000138771, ENSG00000157483, ENSG00000128602, ENSG00000060138, ENSG00000060718, ENSG00000104067, ENSG00000132383, ENSG00000157456, ENSG00000101773, ENSG00000043355, ENSG00000177426, ENSG00000104332, ENSG0000…	1031	203	8117	1.62888	0.990817	0.0706657	2.66943
GOTERM_BP_FAT	GO:0048598~embryonic morphogenesis	35	2.67584	0.00259333	ENSG00000106571, ENSG00000107736, ENSG00000171316, ENSG00000138795, ENSG00000112210, ENSG00000162407, ENSG00000107779, ENSG00000074047, ENSG00000004975, ENSG00000070018, ENSG00000128791, ENSG00000148516, ENSG00000187240, ENSG00000078246, ENSG00000138829, ENSG00000138771, ENSG00000060718, ENSG00000180228, ENSG00000136826, ENSG00000043355, ENSG00000177426, ENSG00000179981, ENSG00000180447, ENSG0000…	1031	165	8117	1.67002	0.99971	0.112895	4.59036
GOTERM_BP_FAT	GO:0001701~in utero embryonic development	24	1.83486	0.0410859	ENSG00000142731, ENSG00000106571, ENSG00000101773, ENSG00000171316, ENSG00000196584, ENSG00000139618, ENSG00000169083, ENSG00000221988, ENSG00000114315, ENSG00000132780, ENSG00000165916, ENSG00000033170, ENSG00000152601, ENSG00000101003, ENSG00000078246, ENSG00000085276, ENSG00000141510, ENSG00000079999, ENSG00000157483, ENSG00000185591, ENSG00000060138, ENSG00000104067, ENSG00000132383, ENSG0000…	1031	125	8117	1.5116	1	0.591515	53.1963
Annotation Cluster 22	Enrichment Score: 2.387965435145684
Category	Term	Count	%	PValue	Genes	List Total	Pop Hits	Pop Total	Fold Enrichment	Bonferroni	Benjamini	FDR
GOTERM_BP_FAT	GO:0051297~centrosome organization	12	0.917431	0.000509543	ENSG00000012048, ENSG00000147874, ENSG00000131351, ENSG00000181163, ENSG00000138160, ENSG00000139618, ENSG00000175216, ENSG00000072864, ENSG00000152240, ENSG00000174799, ENSG00000117650, ENSG00000092036	1031	29	8117	3.25777	0.79787	0.0321029	0.918078
GOTERM_BP_FAT	GO:0031023~microtubule organizing center organization	12	0.917431	0.000980688	ENSG00000012048, ENSG00000147874, ENSG00000131351, ENSG00000181163, ENSG00000138160, ENSG00000139618, ENSG00000175216, ENSG00000072864, ENSG00000152240, ENSG00000174799, ENSG00000117650, ENSG00000092036	1031	31	8117	3.04759	0.953945	0.0525667	1.75988
GOTERM_BP_FAT	GO:0007098~centrosome cycle	7	0.535168	0.0197708	ENSG00000012048, ENSG00000181163, ENSG00000138160, ENSG00000139618, ENSG00000072864, ENSG00000174799, ENSG00000117650	1031	18	8117	3.0617	1	0.411906	30.3274
GOTERM_CC_FAT	GO:0070652~HAUS complex	4	0.30581	0.0284054	ENSG00000147874, ENSG00000131351, ENSG00000152240, ENSG00000092036	906	6	7303	5.3738	1	0.271657	34.1737
Annotation Cluster 23	Enrichment Score: 2.3791279929994236
Category	Term	Count	%	PValue	Genes	List Total	Pop Hits	Pop Total	Fold Enrichment	Bonferroni	Benjamini	FDR
GOTERM_BP_FAT	GO:0006302~double-strand break repair	19	1.4526	2.84979e-05	ENSG00000164754, ENSG00000111247, ENSG00000196584, ENSG00000139618, ENSG00000196419, ENSG00000071539, ENSG00000085999, ENSG00000166896, ENSG00000168496, ENSG00000042088, ENSG00000012048, ENSG00000136492, ENSG00000101868, ENSG00000112941, ENSG00000152457, ENSG00000141510, ENSG00000020922, ENSG00000197299, ENSG00000132383	1031	51	8117	2.93306	0.0855195	0.00241328	0.051558
KEGG_PATHWAY	hsa03440:Homologous recombination	12	0.917431	9.96745e-05	ENSG00000182185, ENSG00000196584, ENSG00000117748, ENSG00000020922, ENSG00000139618, ENSG00000077514, ENSG00000085999, ENSG00000154920, ENSG00000106628, ENSG00000197299, ENSG00000132383, ENSG00000106399	394	24	2952	3.74619	0.0162145	0.00407852	0.120796
GOTERM_BP_FAT	GO:0000725~recombinational repair	7	0.535168	0.00744255	ENSG00000012048, ENSG00000111247, ENSG00000196584, ENSG00000139618, ENSG00000085999, ENSG00000197299, ENSG00000132383	1031	15	8117	3.67404	1	0.227036	12.6447
GOTERM_BP_FAT	GO:0000724~double-strand break repair via homologous recombination	7	0.535168	0.00744255	ENSG00000012048, ENSG00000111247, ENSG00000196584, ENSG00000139618, ENSG00000085999, ENSG00000197299, ENSG00000132383	1031	15	8117	3.67404	1	0.227036	12.6447
GOTERM_BP_FAT	GO:0010212~response to ionizing radiation	12	0.917431	0.0133763	ENSG00000012048, ENSG00000132688, ENSG00000196584, ENSG00000152457, ENSG00000144554, ENSG00000181026, ENSG00000139618, ENSG00000141510, ENSG00000196419, ENSG00000085999, ENSG00000110092, ENSG00000197299	1031	42	8117	2.24941	1	0.333822	21.6273
GOTERM_BP_FAT	GO:0010165~response to X-ray	5	0.382263	0.0408043	ENSG00000196584, ENSG00000139618, ENSG00000141510, ENSG00000110092, ENSG00000197299	1031	11	8117	3.57861	1	0.593957	52.947
GOTERM_BP_FAT	GO:0010332~response to gamma radiation	4	0.30581	0.258357	ENSG00000196584, ENSG00000144554, ENSG00000139618, ENSG00000141510	1031	14	8117	2.24941	1	0.967758	99.5523
Annotation Cluster 24	Enrichment Score: 2.370005299311182
Category	Term	Count	%	PValue	Genes	List Total	Pop Hits	Pop Total	Fold Enrichment	Bonferroni	Benjamini	FDR
GOTERM_BP_FAT	GO:0009953~dorsal/ventral pattern formation	12	0.917431	0.000980688	ENSG00000187240, ENSG00000106571, ENSG00000177426, ENSG00000112210, ENSG00000078246, ENSG00000138696, ENSG00000106689, ENSG00000180447, ENSG00000107779, ENSG00000074047, ENSG00000164651, ENSG00000128602	1031	31	8117	3.04759	0.953945	0.0525667	1.75988
GOTERM_BP_FAT	GO:0003002~regionalization	24	1.83486	0.00123805	ENSG00000106571, ENSG00000138795, ENSG00000177426, ENSG00000112210, ENSG00000138696, ENSG00000104332, ENSG00000064393, ENSG00000180447, ENSG00000179981, ENSG00000074047, ENSG00000107779, ENSG00000164651, ENSG00000070018, ENSG00000170370, ENSG00000004975, ENSG00000114315, ENSG00000187240, ENSG00000152284, ENSG00000078246, ENSG00000145423, ENSG00000106689, ENSG00000128602, ENSG00000167081, ENSG0000…	1031	94	8117	2.01011	0.979476	0.0617208	2.21686
GOTERM_BP_FAT	GO:0048598~embryonic morphogenesis	35	2.67584	0.00259333	ENSG00000106571, ENSG00000107736, ENSG00000171316, ENSG00000138795, ENSG00000112210, ENSG00000162407, ENSG00000107779, ENSG00000074047, ENSG00000004975, ENSG00000070018, ENSG00000128791, ENSG00000148516, ENSG00000187240, ENSG00000078246, ENSG00000138829, ENSG00000138771, ENSG00000060718, ENSG00000180228, ENSG00000136826, ENSG00000043355, ENSG00000177426, ENSG00000179981, ENSG00000180447, ENSG0000…	1031	165	8117	1.67002	0.99971	0.112895	4.59036
GOTERM_BP_FAT	GO:0035108~limb morphogenesis	16	1.22324	0.00401437	ENSG00000106571, ENSG00000171316, ENSG00000138795, ENSG00000112210, ENSG00000138696, ENSG00000180447, ENSG00000107779, ENSG00000164651, ENSG00000070018, ENSG00000187240, ENSG00000152601, ENSG00000078246, ENSG00000085276, ENSG00000138829, ENSG00000198363, ENSG00000148400	1031	57	8117	2.20995	0.999997	0.151152	7.02052
GOTERM_BP_FAT	GO:0035107~appendage morphogenesis	16	1.22324	0.00401437	ENSG00000106571, ENSG00000171316, ENSG00000138795, ENSG00000112210, ENSG00000138696, ENSG00000180447, ENSG00000107779, ENSG00000164651, ENSG00000070018, ENSG00000187240, ENSG00000152601, ENSG00000078246, ENSG00000085276, ENSG00000138829, ENSG00000198363, ENSG00000148400	1031	57	8117	2.20995	0.999997	0.151152	7.02052
GOTERM_BP_FAT	GO:0060173~limb development	16	1.22324	0.00479494	ENSG00000106571, ENSG00000171316, ENSG00000138795, ENSG00000112210, ENSG00000138696, ENSG00000180447, ENSG00000107779, ENSG00000164651, ENSG00000070018, ENSG00000187240, ENSG00000152601, ENSG00000078246, ENSG00000085276, ENSG00000138829, ENSG00000198363, ENSG00000148400	1031	58	8117	2.17185	1	0.173752	8.3304
GOTERM_BP_FAT	GO:0048736~appendage development	16	1.22324	0.00479494	ENSG00000106571, ENSG00000171316, ENSG00000138795, ENSG00000112210, ENSG00000138696, ENSG00000180447, ENSG00000107779, ENSG00000164651, ENSG00000070018, ENSG00000187240, ENSG00000152601, ENSG00000078246, ENSG00000085276, ENSG00000138829, ENSG00000198363, ENSG00000148400	1031	58	8117	2.17185	1	0.173752	8.3304
GOTERM_BP_FAT	GO:0030326~embryonic limb morphogenesis	13	0.993884	0.0200222	ENSG00000106571, ENSG00000171316, ENSG00000138795, ENSG00000112210, ENSG00000180447, ENSG00000164651, ENSG00000070018, ENSG00000187240, ENSG00000152601, ENSG00000078246, ENSG00000085276, ENSG00000138829, ENSG00000148400	1031	50	8117	2.04696	1	0.413257	30.65
GOTERM_BP_FAT	GO:0035113~embryonic appendage morphogenesis	13	0.993884	0.0200222	ENSG00000106571, ENSG00000171316, ENSG00000138795, ENSG00000112210, ENSG00000180447, ENSG00000164651, ENSG00000070018, ENSG00000187240, ENSG00000152601, ENSG00000078246, ENSG00000085276, ENSG00000138829, ENSG00000148400	1031	50	8117	2.04696	1	0.413257	30.65
Annotation Cluster 25	Enrichment Score: 2.337371680330945
Category	Term	Count	%	PValue	Genes	List Total	Pop Hits	Pop Total	Fold Enrichment	Bonferroni	Benjamini	FDR
UP_SEQ_FEATURE	nucleotide phosphate-binding region:ATP	124	9.48012	1.306e-05	ENSG00000141639, ENSG00000171316, ENSG00000185483, ENSG00000095777, ENSG00000090889, ENSG00000168078, ENSG00000137628, ENSG00000064393, ENSG00000071539, ENSG00000089876, ENSG00000136492, ENSG00000156970, ENSG00000197299, ENSG00000121621, ENSG00000135446, ENSG00000123374, ENSG00000116830, ENSG00000131747, ENSG00000112742, ENSG00000163808, ENSG00000186871, ENSG00000115687, ENSG00000137177, ENSG0000…	1304	729	11114	1.44973	0.0420702	0.0106877	0.0237566
SP_PIR_KEYWORDS	atp-binding	154	11.7737	0.000163468	ENSG00000141639, ENSG00000171316, ENSG00000185483, ENSG00000051341, ENSG00000095777, ENSG00000090889, ENSG00000137628, ENSG00000168078, ENSG00000064393, ENSG00000093217, ENSG00000071539, ENSG00000196419, ENSG00000128641, ENSG00000145907, ENSG00000089876, ENSG00000156110, ENSG00000136492, ENSG00000156970, ENSG00000197299, ENSG00000121621, ENSG00000117593, ENSG00000135446, ENSG00000123374, ENSG0000…	1305	994	11119	1.32005	0.0895701	0.00425629	0.239698
GOTERM_MF_FAT	GO:0005524~ATP binding	163	12.4618	0.00163097	ENSG00000141639, ENSG00000185483, ENSG00000171316, ENSG00000051341, ENSG00000095777, ENSG00000090889, ENSG00000137628, ENSG00000168078, ENSG00000064393, ENSG00000093217, ENSG00000071539, ENSG00000196419, ENSG00000128641, ENSG00000145907, ENSG00000089876, ENSG00000156110, ENSG00000136492, ENSG00000156970, ENSG00000121621, ENSG00000197299, ENSG00000117593, ENSG00000135446, ENSG00000123374, ENSG0000…	943	1077	7713	1.23789	0.812644	0.169795	2.55424
GOTERM_MF_FAT	GO:0032559~adenyl ribonucleotide binding	163	12.4618	0.00254739	ENSG00000141639, ENSG00000185483, ENSG00000171316, ENSG00000051341, ENSG00000095777, ENSG00000090889, ENSG00000137628, ENSG00000168078, ENSG00000064393, ENSG00000093217, ENSG00000071539, ENSG00000196419, ENSG00000128641, ENSG00000145907, ENSG00000089876, ENSG00000156110, ENSG00000136492, ENSG00000156970, ENSG00000121621, ENSG00000197299, ENSG00000117593, ENSG00000135446, ENSG00000123374, ENSG0000…	943	1088	7713	1.22538	0.926975	0.195938	3.96247
SP_PIR_KEYWORDS	nucleotide-binding	174	13.3028	0.00614986	ENSG00000141639, ENSG00000185483, ENSG00000171316, ENSG00000095777, ENSG00000090889, ENSG00000137628, ENSG00000168078, ENSG00000064393, ENSG00000093217, ENSG00000071539, ENSG00000196419, ENSG00000128641, ENSG00000145907, ENSG00000089876, ENSG00000054392, ENSG00000138758, ENSG00000156110, ENSG00000109113, ENSG00000136492, ENSG00000156970, ENSG00000188229, ENSG00000121621, ENSG00000197299, ENSG0000…	1305	1238	11119	1.19752	0.971013	0.0989051	8.65775
GOTERM_MF_FAT	GO:0030554~adenyl nucleotide binding	167	12.7676	0.00628759	ENSG00000141639, ENSG00000185483, ENSG00000171316, ENSG00000051341, ENSG00000095777, ENSG00000090889, ENSG00000137628, ENSG00000168078, ENSG00000064393, ENSG00000093217, ENSG00000071539, ENSG00000196419, ENSG00000128641, ENSG00000145907, ENSG00000089876, ENSG00000156110, ENSG00000136492, ENSG00000177646, ENSG00000156970, ENSG00000141994, ENSG00000121621, ENSG00000197299, ENSG00000117593, ENSG0000…	943	1143	7713	1.19504	0.998453	0.392135	9.51461
GOTERM_MF_FAT	GO:0001883~purine nucleoside binding	167	12.7676	0.0106957	ENSG00000141639, ENSG00000185483, ENSG00000171316, ENSG00000051341, ENSG00000095777, ENSG00000090889, ENSG00000137628, ENSG00000168078, ENSG00000064393, ENSG00000093217, ENSG00000071539, ENSG00000196419, ENSG00000128641, ENSG00000145907, ENSG00000089876, ENSG00000156110, ENSG00000136492, ENSG00000177646, ENSG00000156970, ENSG00000141994, ENSG00000121621, ENSG00000197299, ENSG00000117593, ENSG0000…	943	1159	7713	1.17854	0.999984	0.47743	15.6719
GOTERM_MF_FAT	GO:0001882~nucleoside binding	168	12.844	0.0107222	ENSG00000141639, ENSG00000185483, ENSG00000171316, ENSG00000051341, ENSG00000095777, ENSG00000090889, ENSG00000137628, ENSG00000168078, ENSG00000064393, ENSG00000093217, ENSG00000071539, ENSG00000196419, ENSG00000128641, ENSG00000145907, ENSG00000089876, ENSG00000156110, ENSG00000101868, ENSG00000136492, ENSG00000177646, ENSG00000156970, ENSG00000141994, ENSG00000121621, ENSG00000197299, ENSG0000…	943	1166	7713	1.17848	0.999984	0.459071	15.7077
GOTERM_MF_FAT	GO:0032555~purine ribonucleotide binding	183	13.9908	0.0280022	ENSG00000141639, ENSG00000185483, ENSG00000171316, ENSG00000051341, ENSG00000095777, ENSG00000090889, ENSG00000137628, ENSG00000168078, ENSG00000064393, ENSG00000093217, ENSG00000071539, ENSG00000196419, ENSG00000128641, ENSG00000145907, ENSG00000089876, ENSG00000054392, ENSG00000138758, ENSG00000156110, ENSG00000109113, ENSG00000136492, ENSG00000156970, ENSG00000188229, ENSG00000121621, ENSG0000…	943	1315	7713	1.13825	1	0.673974	36.2504
GOTERM_MF_FAT	GO:0032553~ribonucleotide binding	183	13.9908	0.0280022	ENSG00000141639, ENSG00000185483, ENSG00000171316, ENSG00000051341, ENSG00000095777, ENSG00000090889, ENSG00000137628, ENSG00000168078, ENSG00000064393, ENSG00000093217, ENSG00000071539, ENSG00000196419, ENSG00000128641, ENSG00000145907, ENSG00000089876, ENSG00000054392, ENSG00000138758, ENSG00000156110, ENSG00000109113, ENSG00000136492, ENSG00000156970, ENSG00000188229, ENSG00000121621, ENSG0000…	943	1315	7713	1.13825	1	0.673974	36.2504
GOTERM_MF_FAT	GO:0017076~purine nucleotide binding	187	14.2966	0.0518115	ENSG00000141639, ENSG00000185483, ENSG00000171316, ENSG00000051341, ENSG00000095777, ENSG00000090889, ENSG00000137628, ENSG00000168078, ENSG00000064393, ENSG00000093217, ENSG00000071539, ENSG00000196419, ENSG00000128641, ENSG00000145907, ENSG00000089876, ENSG00000054392, ENSG00000138758, ENSG00000156110, ENSG00000136492, ENSG00000109113, ENSG00000177646, ENSG00000156970, ENSG00000141994, ENSG0000…	943	1372	7713	1.11481	1	0.789775	56.9723
GOTERM_MF_FAT	GO:0000166~nucleotide binding	218	16.6667	0.0559711	ENSG00000141639, ENSG00000171316, ENSG00000176890, ENSG00000090889, ENSG00000137628, ENSG00000168078, ENSG00000071539, ENSG00000064393, ENSG00000183684, ENSG00000145907, ENSG00000054392, ENSG00000136492, ENSG00000109113, ENSG00000177646, ENSG00000111605, ENSG00000156970, ENSG00000166831, ENSG00000123374, ENSG00000143545, ENSG00000131747, ENSG00000164070, ENSG00000166598, ENSG00000126785, ENSG0000…	943	1619	7713	1.10134	1	0.797536	59.8688
Annotation Cluster 26	Enrichment Score: 2.25137600326366
Category	Term	Count	%	PValue	Genes	List Total	Pop Hits	Pop Total	Fold Enrichment	Bonferroni	Benjamini	FDR
INTERPRO	IPR001357:BRCT	9	0.688073	0.00326563	ENSG00000012048, ENSG00000137337, ENSG00000143799, ENSG00000138376, ENSG00000073050, ENSG00000035928, ENSG00000114346, ENSG00000006634, ENSG00000102699	1160	23	9941	3.35341	0.995396	0.489617	5.34722
SMART	SM00292:BRCT	9	0.688073	0.00412053	ENSG00000012048, ENSG00000137337, ENSG00000143799, ENSG00000138376, ENSG00000073050, ENSG00000035928, ENSG00000114346, ENSG00000006634, ENSG00000102699	673	23	5547	3.22521	0.709044	0.337363	5.36553
UP_SEQ_FEATURE	domain:BRCT 2	6	0.458716	0.00856619	ENSG00000012048, ENSG00000137337, ENSG00000138376, ENSG00000073050, ENSG00000114346, ENSG00000006634	1304	12	11114	4.2615	1	0.923762	14.4878
UP_SEQ_FEATURE	domain:BRCT 1	6	0.458716	0.00856619	ENSG00000012048, ENSG00000137337, ENSG00000138376, ENSG00000073050, ENSG00000114346, ENSG00000006634	1304	12	11114	4.2615	1	0.923762	14.4878
Annotation Cluster 27	Enrichment Score: 2.095908384693309
Category	Term	Count	%	PValue	Genes	List Total	Pop Hits	Pop Total	Fold Enrichment	Bonferroni	Benjamini	FDR
GOTERM_CC_FAT	GO:0030894~replisome	8	0.611621	0.000197438	ENSG00000101868, ENSG00000117748, ENSG00000077514, ENSG00000014138, ENSG00000112118, ENSG00000132383, ENSG00000106399, ENSG00000198056	906	12	7303	5.3738	0.0990066	0.00400187	0.286114
GOTERM_CC_FAT	GO:0043601~nuclear replisome	8	0.611621	0.000197438	ENSG00000101868, ENSG00000117748, ENSG00000077514, ENSG00000014138, ENSG00000112118, ENSG00000132383, ENSG00000106399, ENSG00000198056	906	12	7303	5.3738	0.0990066	0.00400187	0.286114
GOTERM_CC_FAT	GO:0043596~nuclear replication fork	8	0.611621	0.000382144	ENSG00000101868, ENSG00000117748, ENSG00000077514, ENSG00000014138, ENSG00000112118, ENSG00000132383, ENSG00000106399, ENSG00000198056	906	13	7303	4.96043	0.18275	0.0074466	0.553089
GOTERM_CC_FAT	GO:0044454~nuclear chromosome part	24	1.83486	0.00120578	ENSG00000073111, ENSG00000117748, ENSG00000169679, ENSG00000196419, ENSG00000149503, ENSG00000180198, ENSG00000014138, ENSG00000106399, ENSG00000101868, ENSG00000152455, ENSG00000111602, ENSG00000077514, ENSG00000116478, ENSG00000091651, ENSG00000140451, ENSG00000197299, ENSG00000119772, ENSG00000112118, ENSG00000129810, ENSG00000166508, ENSG00000132383, ENSG00000163535, ENSG00000198056, ENSG0000…	906	96	7303	2.01518	0.471143	0.0203399	1.7355
GOTERM_CC_FAT	GO:0005658~alpha DNA polymerase:primase complex	4	0.30581	0.0156317	ENSG00000101868, ENSG00000014138, ENSG00000112118, ENSG00000198056	906	5	7303	6.44857	0.999756	0.183637	20.4368
GOTERM_CC_FAT	GO:0005662~DNA replication factor A complex	3	0.229358	0.118868	ENSG00000117748, ENSG00000132383, ENSG00000106399	906	5	7303	4.83642	1	0.620299	84.0595
GOTERM_BP_FAT	GO:0000718~nucleotide-excision repair, DNA damage removal	3	0.229358	0.6547	ENSG00000117748, ENSG00000132383, ENSG00000106399	1031	17	8117	1.38934	1	0.999345	100
GOTERM_BP_FAT	GO:0006308~DNA catabolic process	5	0.382263	0.782099	ENSG00000131238, ENSG00000117748, ENSG00000164305, ENSG00000132383, ENSG00000106399	1031	41	8117	0.960114	1	0.999896	100
Annotation Cluster 28	Enrichment Score: 2.0863027896424313
Category	Term	Count	%	PValue	Genes	List Total	Pop Hits	Pop Total	Fold Enrichment	Bonferroni	Benjamini	FDR
GOTERM_BP_FAT	GO:0001501~skeletal system development	36	2.75229	0.000405093	ENSG00000105894, ENSG00000106571, ENSG00000171316, ENSG00000196923, ENSG00000138696, ENSG00000141753, ENSG00000077782, ENSG00000107779, ENSG00000074047, ENSG00000113140, ENSG00000112280, ENSG00000128791, ENSG00000160783, ENSG00000148516, ENSG00000155850, ENSG00000178522, ENSG00000078246, ENSG00000104447, ENSG00000131981, ENSG00000128602, ENSG00000060718, ENSG00000180228, ENSG00000072840, ENSG0000…	1031	155	8117	1.82855	0.719459	0.0266809	0.730535
GOTERM_BP_FAT	GO:0001503~ossification	15	1.14679	0.0310147	ENSG00000105894, ENSG00000101144, ENSG00000178522, ENSG00000196923, ENSG00000115641, ENSG00000107789, ENSG00000101938, ENSG00000074047, ENSG00000142798, ENSG00000185591, ENSG00000128602, ENSG00000113140, ENSG00000128791, ENSG00000160783, ENSG00000155850	1031	65	8117	1.81683	1	0.521723	43.4553
GOTERM_BP_FAT	GO:0060348~bone development	15	1.14679	0.04385	ENSG00000105894, ENSG00000101144, ENSG00000178522, ENSG00000196923, ENSG00000115641, ENSG00000107789, ENSG00000101938, ENSG00000074047, ENSG00000142798, ENSG00000185591, ENSG00000128602, ENSG00000113140, ENSG00000128791, ENSG00000160783, ENSG00000155850	1031	68	8117	1.73668	1	0.603637	55.5784
Annotation Cluster 29	Enrichment Score: 2.001977267148922
Category	Term	Count	%	PValue	Genes	List Total	Pop Hits	Pop Total	Fold Enrichment	Bonferroni	Benjamini	FDR
GOTERM_BP_FAT	GO:0045934~negative regulation of nucleobase, nucleoside, nucleotide and nucleic acid metabolic process	66	5.04587	0.00150823	ENSG00000106571, ENSG00000138795, ENSG00000117724, ENSG00000064393, ENSG00000104447, ENSG00000168310, ENSG00000111602, ENSG00000117318, ENSG00000116478, ENSG00000164105, ENSG00000164104, ENSG00000197299, ENSG00000060138, ENSG00000135547, ENSG00000138376, ENSG00000189403, ENSG00000074800, ENSG00000185513, ENSG00000128708, ENSG00000110693, ENSG00000080839, ENSG00000114315, ENSG00000172201, ENSG0000…	1031	358	8117	1.45144	0.991217	0.0702547	2.69444
GOTERM_BP_FAT	GO:0051172~negative regulation of nitrogen compound metabolic process	66	5.04587	0.00175727	ENSG00000106571, ENSG00000138795, ENSG00000117724, ENSG00000064393, ENSG00000104447, ENSG00000168310, ENSG00000111602, ENSG00000117318, ENSG00000116478, ENSG00000164105, ENSG00000164104, ENSG00000197299, ENSG00000060138, ENSG00000135547, ENSG00000138376, ENSG00000189403, ENSG00000074800, ENSG00000185513, ENSG00000128708, ENSG00000110693, ENSG00000080839, ENSG00000114315, ENSG00000172201, ENSG0000…	1031	360	8117	1.44337	0.995984	0.0790499	3.13269
GOTERM_BP_FAT	GO:0010605~negative regulation of macromolecule metabolic process	88	6.72783	0.0040107	ENSG00000106571, ENSG00000138795, ENSG00000112029, ENSG00000138448, ENSG00000112210, ENSG00000117724, ENSG00000064393, ENSG00000127241, ENSG00000136770, ENSG00000156970, ENSG00000111602, ENSG00000104447, ENSG00000168310, ENSG00000116478, ENSG00000117318, ENSG00000164105, ENSG00000197299, ENSG00000164104, ENSG00000163083, ENSG00000060138, ENSG00000135547, ENSG00000164109, ENSG00000180228, ENSG0000…	1031	523	8117	1.3247	0.999997	0.152852	7.01431
GOTERM_BP_FAT	GO:0051253~negative regulation of RNA metabolic process	47	3.59327	0.00432662	ENSG00000138795, ENSG00000084093, ENSG00000064393, ENSG00000169016, ENSG00000074047, ENSG00000102054, ENSG00000142611, ENSG00000164683, ENSG00000148516, ENSG00000114861, ENSG00000181163, ENSG00000104447, ENSG00000168310, ENSG00000117318, ENSG00000116478, ENSG00000164105, ENSG00000060138, ENSG00000135547, ENSG00000188529, ENSG00000136826, ENSG00000177426, ENSG00000138376, ENSG00000189403, ENSG0000…	1031	247	8117	1.49809	0.999999	0.160027	7.54661
GOTERM_BP_FAT	GO:0000122~negative regulation of transcription from RNA polymerase II promoter	35	2.67584	0.00682268	ENSG00000138795, ENSG00000064393, ENSG00000169016, ENSG00000074047, ENSG00000102054, ENSG00000142611, ENSG00000164683, ENSG00000148516, ENSG00000114861, ENSG00000168310, ENSG00000117318, ENSG00000116478, ENSG00000164105, ENSG00000060138, ENSG00000135547, ENSG00000177426, ENSG00000162775, ENSG00000189403, ENSG00000074800, ENSG00000177425, ENSG00000068024, ENSG00000110693, ENSG00000120896, ENSG0000…	1031	175	8117	1.57459	1	0.212289	11.6521
GOTERM_BP_FAT	GO:0016481~negative regulation of transcription	56	4.28135	0.012044	ENSG00000106571, ENSG00000138795, ENSG00000117724, ENSG00000064393, ENSG00000168310, ENSG00000104447, ENSG00000111602, ENSG00000117318, ENSG00000116478, ENSG00000164105, ENSG00000164104, ENSG00000060138, ENSG00000135547, ENSG00000189403, ENSG00000074800, ENSG00000185513, ENSG00000128708, ENSG00000110693, ENSG00000114315, ENSG00000080839, ENSG00000172201, ENSG00000141510, ENSG00000204209, ENSG0000…	1031	322	8117	1.36921	1	0.316216	19.6899
GOTERM_BP_FAT	GO:0010629~negative regulation of gene expression	61	4.66361	0.0125831	ENSG00000106571, ENSG00000138795, ENSG00000117724, ENSG00000064393, ENSG00000104447, ENSG00000168310, ENSG00000111602, ENSG00000117318, ENSG00000116478, ENSG00000164105, ENSG00000164104, ENSG00000060138, ENSG00000135547, ENSG00000180228, ENSG00000189403, ENSG00000074800, ENSG00000185513, ENSG00000128708, ENSG00000110693, ENSG00000114315, ENSG00000080839, ENSG00000172201, ENSG00000141510, ENSG0000…	1031	357	8117	1.34524	1	0.322569	20.4793
GOTERM_BP_FAT	GO:0010558~negative regulation of macromolecule biosynthetic process	65	4.96942	0.0128493	ENSG00000106571, ENSG00000138795, ENSG00000138448, ENSG00000117724, ENSG00000064393, ENSG00000104447, ENSG00000168310, ENSG00000111602, ENSG00000117318, ENSG00000116478, ENSG00000164105, ENSG00000164104, ENSG00000197299, ENSG00000163083, ENSG00000060138, ENSG00000135547, ENSG00000189403, ENSG00000074800, ENSG00000185513, ENSG00000128708, ENSG00000110693, ENSG00000080839, ENSG00000114315, ENSG0000…	1031	385	8117	1.3292	1	0.325563	20.8663
GOTERM_BP_FAT	GO:0045892~negative regulation of transcription, DNA-dependent	44	3.36391	0.0138638	ENSG00000138795, ENSG00000084093, ENSG00000064393, ENSG00000169016, ENSG00000074047, ENSG00000102054, ENSG00000142611, ENSG00000164683, ENSG00000148516, ENSG00000114861, ENSG00000168310, ENSG00000104447, ENSG00000117318, ENSG00000116478, ENSG00000164105, ENSG00000060138, ENSG00000135547, ENSG00000136826, ENSG00000177426, ENSG00000189403, ENSG00000162775, ENSG00000074800, ENSG00000177425, ENSG0000…	1031	243	8117	1.42555	1	0.341042	22.3252
GOTERM_BP_FAT	GO:0009890~negative regulation of biosynthetic process	66	5.04587	0.0158872	ENSG00000106571, ENSG00000138795, ENSG00000138448, ENSG00000117724, ENSG00000064393, ENSG00000104447, ENSG00000168310, ENSG00000111602, ENSG00000116478, ENSG00000117318, ENSG00000164105, ENSG00000164104, ENSG00000197299, ENSG00000163083, ENSG00000060138, ENSG00000135547, ENSG00000189403, ENSG00000074800, ENSG00000185513, ENSG00000128708, ENSG00000110693, ENSG00000080839, ENSG00000114315, ENSG0000…	1031	396	8117	1.31216	1	0.366637	25.1593
GOTERM_BP_FAT	GO:0031327~negative regulation of cellular biosynthetic process	65	4.96942	0.0167732	ENSG00000106571, ENSG00000138795, ENSG00000117724, ENSG00000064393, ENSG00000104447, ENSG00000168310, ENSG00000111602, ENSG00000117318, ENSG00000116478, ENSG00000164105, ENSG00000164104, ENSG00000197299, ENSG00000163083, ENSG00000060138, ENSG00000135547, ENSG00000189403, ENSG00000074800, ENSG00000185513, ENSG00000128708, ENSG00000110693, ENSG00000080839, ENSG00000114315, ENSG00000172201, ENSG0000…	1031	390	8117	1.31216	1	0.377359	26.3692
GOTERM_BP_FAT	GO:0006357~regulation of transcription from RNA polymerase II promoter	74	5.65749	0.0315116	ENSG00000138795, ENSG00000111783, ENSG00000184486, ENSG00000064393, ENSG00000196419, ENSG00000130772, ENSG00000170345, ENSG00000074219, ENSG00000136492, ENSG00000168310, ENSG00000116478, ENSG00000117318, ENSG00000164105, ENSG00000118495, ENSG00000164104, ENSG00000060138, ENSG00000135547, ENSG00000101773, ENSG00000189403, ENSG00000115641, ENSG00000074800, ENSG00000110693, ENSG00000080839, ENSG0000…	1031	467	8117	1.24753	1	0.522195	43.9778
GOTERM_MF_FAT	GO:0016564~transcription repressor activity	36	2.75229	0.132498	ENSG00000084093, ENSG00000064393, ENSG00000167967, ENSG00000169016, ENSG00000102054, ENSG00000165891, ENSG00000142611, ENSG00000148516, ENSG00000114861, ENSG00000213988, ENSG00000104447, ENSG00000035928, ENSG00000117318, ENSG00000164105, ENSG00000164104, ENSG00000120690, ENSG00000060138, ENSG00000106462, ENSG00000144791, ENSG00000136826, ENSG00000177426, ENSG00000074800, ENSG00000148411, ENSG0000…	943	237	7713	1.24241	1	0.960864	89.4924
Annotation Cluster 30	Enrichment Score: 1.959408099561721
Category	Term	Count	%	PValue	Genes	List Total	Pop Hits	Pop Total	Fold Enrichment	Bonferroni	Benjamini	FDR
GOTERM_BP_FAT	GO:0009891~positive regulation of biosynthetic process	73	5.58104	0.00259383	ENSG00000106571, ENSG00000138795, ENSG00000111783, ENSG00000184486, ENSG00000064393, ENSG00000196419, ENSG00000170345, ENSG00000074219, ENSG00000138346, ENSG00000057252, ENSG00000116478, ENSG00000118495, ENSG00000197299, ENSG00000164104, ENSG00000143621, ENSG00000135446, ENSG00000145386, ENSG00000123374, ENSG00000115641, ENSG00000135272, ENSG00000110693, ENSG00000114315, ENSG00000134222, ENSG0000…	1031	413	8117	1.39158	0.999711	0.111374	4.59122
GOTERM_BP_FAT	GO:0031328~positive regulation of cellular biosynthetic process	72	5.50459	0.00309128	ENSG00000106571, ENSG00000138795, ENSG00000111783, ENSG00000184486, ENSG00000064393, ENSG00000196419, ENSG00000170345, ENSG00000074219, ENSG00000138346, ENSG00000057252, ENSG00000116478, ENSG00000118495, ENSG00000197299, ENSG00000164104, ENSG00000143621, ENSG00000135446, ENSG00000145386, ENSG00000123374, ENSG00000115641, ENSG00000135272, ENSG00000110693, ENSG00000114315, ENSG00000134222, ENSG0000…	1031	409	8117	1.38595	0.999939	0.12785	5.44867
GOTERM_BP_FAT	GO:0010557~positive regulation of macromolecule biosynthetic process	70	5.35168	0.00324956	ENSG00000106571, ENSG00000138795, ENSG00000111783, ENSG00000184486, ENSG00000064393, ENSG00000196419, ENSG00000170345, ENSG00000074219, ENSG00000138346, ENSG00000057252, ENSG00000116478, ENSG00000118495, ENSG00000197299, ENSG00000164104, ENSG00000143621, ENSG00000135446, ENSG00000145386, ENSG00000123374, ENSG00000115641, ENSG00000135272, ENSG00000110693, ENSG00000114315, ENSG00000134222, ENSG0000…	1031	396	8117	1.39168	0.999963	0.132216	5.71997
GOTERM_BP_FAT	GO:0045941~positive regulation of transcription	63	4.81651	0.00487693	ENSG00000106571, ENSG00000138795, ENSG00000111783, ENSG00000184486, ENSG00000064393, ENSG00000196419, ENSG00000170345, ENSG00000074219, ENSG00000116478, ENSG00000197299, ENSG00000118495, ENSG00000164104, ENSG00000143621, ENSG00000145386, ENSG00000123374, ENSG00000115641, ENSG00000135272, ENSG00000110693, ENSG00000114315, ENSG00000134222, ENSG00000124496, ENSG00000143258, ENSG00000172493, ENSG0000…	1031	355	8117	1.39717	1	0.174449	8.46696
GOTERM_BP_FAT	GO:0045893~positive regulation of transcription, DNA-dependent	54	4.12844	0.00498076	ENSG00000138795, ENSG00000111783, ENSG00000184486, ENSG00000064393, ENSG00000196419, ENSG00000170345, ENSG00000074219, ENSG00000116478, ENSG00000118495, ENSG00000164104, ENSG00000143621, ENSG00000115641, ENSG00000135272, ENSG00000110693, ENSG00000114315, ENSG00000134222, ENSG00000124496, ENSG00000143258, ENSG00000172493, ENSG00000170989, ENSG00000101144, ENSG00000169714, ENSG00000141510, ENSG0000…	1031	295	8117	1.44115	1	0.17583	8.63963
GOTERM_BP_FAT	GO:0051254~positive regulation of RNA metabolic process	54	4.12844	0.00613794	ENSG00000138795, ENSG00000111783, ENSG00000184486, ENSG00000064393, ENSG00000196419, ENSG00000170345, ENSG00000074219, ENSG00000116478, ENSG00000118495, ENSG00000164104, ENSG00000143621, ENSG00000115641, ENSG00000135272, ENSG00000110693, ENSG00000114315, ENSG00000134222, ENSG00000124496, ENSG00000143258, ENSG00000172493, ENSG00000170989, ENSG00000101144, ENSG00000169714, ENSG00000141510, ENSG0000…	1031	298	8117	1.42664	1	0.20541	10.5434
GOTERM_BP_FAT	GO:0010628~positive regulation of gene expression	63	4.81651	0.00802856	ENSG00000106571, ENSG00000138795, ENSG00000111783, ENSG00000184486, ENSG00000064393, ENSG00000196419, ENSG00000170345, ENSG00000074219, ENSG00000116478, ENSG00000197299, ENSG00000118495, ENSG00000164104, ENSG00000143621, ENSG00000145386, ENSG00000123374, ENSG00000115641, ENSG00000135272, ENSG00000110693, ENSG00000114315, ENSG00000134222, ENSG00000124496, ENSG00000143258, ENSG00000172493, ENSG0000…	1031	363	8117	1.36638	1	0.240322	13.5733
GOTERM_BP_FAT	GO:0045935~positive regulation of nucleobase, nucleoside, nucleotide and nucleic acid metabolic process	65	4.96942	0.014979	ENSG00000106571, ENSG00000138795, ENSG00000111783, ENSG00000184486, ENSG00000064393, ENSG00000196419, ENSG00000170345, ENSG00000074219, ENSG00000138346, ENSG00000116478, ENSG00000118495, ENSG00000197299, ENSG00000164104, ENSG00000143621, ENSG00000145386, ENSG00000123374, ENSG00000115641, ENSG00000135272, ENSG00000110693, ENSG00000114315, ENSG00000134222, ENSG00000124496, ENSG00000172493, ENSG0000…	1031	388	8117	1.31892	1	0.357555	23.8995
GOTERM_BP_FAT	GO:0051173~positive regulation of nitrogen compound metabolic process	66	5.04587	0.019573	ENSG00000106571, ENSG00000138795, ENSG00000111783, ENSG00000184486, ENSG00000064393, ENSG00000196419, ENSG00000170345, ENSG00000074219, ENSG00000138346, ENSG00000116478, ENSG00000118495, ENSG00000197299, ENSG00000164104, ENSG00000143621, ENSG00000145386, ENSG00000123374, ENSG00000115641, ENSG00000135272, ENSG00000110693, ENSG00000114315, ENSG00000134222, ENSG00000124496, ENSG00000172493, ENSG0000…	1031	400	8117	1.29903	1	0.411392	30.0724
GOTERM_BP_FAT	GO:0010604~positive regulation of macromolecule metabolic process	85	6.49847	0.0236411	ENSG00000106571, ENSG00000138795, ENSG00000112029, ENSG00000111783, ENSG00000184486, ENSG00000064393, ENSG00000196419, ENSG00000170345, ENSG00000107779, ENSG00000074219, ENSG00000136160, ENSG00000138346, ENSG00000116478, ENSG00000057252, ENSG00000118495, ENSG00000197299, ENSG00000164104, ENSG00000143621, ENSG00000135446, ENSG00000123374, ENSG00000145386, ENSG00000138376, ENSG00000115641, ENSG0000…	1031	539	8117	1.24156	1	0.45407	35.141
GOTERM_BP_FAT	GO:0045944~positive regulation of transcription from RNA polymerase II promoter	39	2.98165	0.0247123	ENSG00000138795, ENSG00000137693, ENSG00000111783, ENSG00000184486, ENSG00000064393, ENSG00000196419, ENSG00000170345, ENSG00000074047, ENSG00000074219, ENSG00000148516, ENSG00000109819, ENSG00000116478, ENSG00000164104, ENSG00000118495, ENSG00000120690, ENSG00000123219, ENSG00000136826, ENSG00000162775, ENSG00000169083, ENSG00000068024, ENSG00000110693, ENSG00000114315, ENSG00000181449, ENSG0000…	1031	218	8117	1.40846	1	0.466327	36.4167
GOTERM_BP_FAT	GO:0006357~regulation of transcription from RNA polymerase II promoter	74	5.65749	0.0315116	ENSG00000138795, ENSG00000111783, ENSG00000184486, ENSG00000064393, ENSG00000196419, ENSG00000130772, ENSG00000170345, ENSG00000074219, ENSG00000136492, ENSG00000168310, ENSG00000116478, ENSG00000117318, ENSG00000164105, ENSG00000118495, ENSG00000164104, ENSG00000060138, ENSG00000135547, ENSG00000101773, ENSG00000189403, ENSG00000115641, ENSG00000074800, ENSG00000110693, ENSG00000080839, ENSG0000…	1031	467	8117	1.24753	1	0.522195	43.9778
GOTERM_MF_FAT	GO:0016563~transcription activator activity	42	3.21101	0.200214	ENSG00000196482, ENSG00000138795, ENSG00000137693, ENSG00000198157, ENSG00000139618, ENSG00000196419, ENSG00000132341, ENSG00000167967, ENSG00000074047, ENSG00000142611, ENSG00000074219, ENSG00000114166, ENSG00000160783, ENSG00000148516, ENSG00000124782, ENSG00000181163, ENSG00000109819, ENSG00000107438, ENSG00000100968, ENSG00000120656, ENSG00000116478, ENSG00000120690, ENSG00000136826, ENSG0000…	943	294	7713	1.16846	1	0.983314	97.1027
Annotation Cluster 31	Enrichment Score: 1.9542547137493211
Category	Term	Count	%	PValue	Genes	List Total	Pop Hits	Pop Total	Fold Enrichment	Bonferroni	Benjamini	FDR
GOTERM_CC_FAT	GO:0000786~nucleosome	10	0.764526	0.000730379	ENSG00000181218, ENSG00000184260, ENSG00000168298, ENSG00000197061, ENSG00000164032, ENSG00000115163, ENSG00000187837, ENSG00000184357, ENSG00000127483, ENSG00000124575	906	22	7303	3.66396	0.320081	0.0136834	1.05462
SP_PIR_KEYWORDS	nucleosome	5	0.382263	0.00232292	ENSG00000168298, ENSG00000120656, ENSG00000187837, ENSG00000184357, ENSG00000124575	1305	6	11119	7.10026	0.736817	0.0500468	3.35632
INTERPRO	IPR005819:Histone H5	5	0.382263	0.00480949	ENSG00000168298, ENSG00000187837, ENSG00000184357, ENSG00000127483, ENSG00000124575	1160	7	9941	6.12131	0.99964	0.547546	7.78045
INTERPRO	IPR005818:Histone H1/H5	5	0.382263	0.0216475	ENSG00000168298, ENSG00000187837, ENSG00000184357, ENSG00000127483, ENSG00000124575	1160	10	9941	4.28491	1	0.879694	30.7667
SMART	SM00526:H15	5	0.382263	0.0246013	ENSG00000168298, ENSG00000187837, ENSG00000184357, ENSG00000127483, ENSG00000124575	673	10	5547	4.1211	0.999417	0.710991	28.3007
PIR_SUPERFAMILY	PIRSF038219:histone H1	4	0.30581	0.028188	ENSG00000168298, ENSG00000187837, ENSG00000184357, ENSG00000124575	503	6	4060	5.38105	1	0.994505	34.0875
GOTERM_BP_FAT	GO:0016584~nucleosome positioning	3	0.229358	0.17065	ENSG00000168298, ENSG00000187837, ENSG00000124575	1031	6	8117	3.93647	1	0.919476	96.6158
Annotation Cluster 32	Enrichment Score: 1.916023387206757
Category	Term	Count	%	PValue	Genes	List Total	Pop Hits	Pop Total	Fold Enrichment	Bonferroni	Benjamini	FDR
GOTERM_BP_FAT	GO:0051303~establishment of chromosome localization	8	0.611621	0.000791648	ENSG00000089685, ENSG00000138778, ENSG00000146670, ENSG00000117724, ENSG00000179041, ENSG00000072864, ENSG00000121621, ENSG00000126787	1031	14	8117	4.49882	0.916623	0.0457935	1.42293
GOTERM_BP_FAT	GO:0050000~chromosome localization	8	0.611621	0.000791648	ENSG00000089685, ENSG00000138778, ENSG00000146670, ENSG00000117724, ENSG00000179041, ENSG00000072864, ENSG00000121621, ENSG00000126787	1031	14	8117	4.49882	0.916623	0.0457935	1.42293
GOTERM_BP_FAT	GO:0051310~metaphase plate congression	5	0.382263	0.0287944	ENSG00000138778, ENSG00000146670, ENSG00000117724, ENSG00000179041, ENSG00000121621	1031	10	8117	3.93647	1	0.5086	41.0642
GOTERM_BP_FAT	GO:0051656~establishment of organelle localization	14	1.07034	0.0398042	ENSG00000135476, ENSG00000138778, ENSG00000117724, ENSG00000072864, ENSG00000080986, ENSG00000126787, ENSG00000089685, ENSG00000181163, ENSG00000146670, ENSG00000179041, ENSG00000106636, ENSG00000121621, ENSG00000115163, ENSG00000137804	1031	61	8117	1.8069	1	0.589771	52.0511
GOTERM_BP_FAT	GO:0051640~organelle localization	16	1.22324	0.0636104	ENSG00000138778, ENSG00000135476, ENSG00000117724, ENSG00000072864, ENSG00000080986, ENSG00000066279, ENSG00000126787, ENSG00000089685, ENSG00000181163, ENSG00000146670, ENSG00000179041, ENSG00000106636, ENSG00000121621, ENSG00000115163, ENSG00000137804, ENSG00000013810	1031	78	8117	1.61496	1	0.706897	69.5582
GOTERM_BP_FAT	GO:0007080~mitotic metaphase plate congression	4	0.30581	0.0698283	ENSG00000138778, ENSG00000146670, ENSG00000179041, ENSG00000121621	1031	8	8117	3.93647	1	0.724784	73.0158
Annotation Cluster 33	Enrichment Score: 1.8655501622852548
Category	Term	Count	%	PValue	Genes	List Total	Pop Hits	Pop Total	Fold Enrichment	Bonferroni	Benjamini	FDR
GOTERM_BP_FAT	GO:0007093~mitotic cell cycle checkpoint	14	1.07034	0.000519404	ENSG00000138778, ENSG00000117724, ENSG00000169679, ENSG00000112742, ENSG00000185088, ENSG00000170312, ENSG00000122952, ENSG00000156970, ENSG00000075218, ENSG00000141510, ENSG00000110092, ENSG00000164109, ENSG00000184445, ENSG00000145386	1031	38	8117	2.90056	0.80403	0.0320704	0.935767
GOTERM_BP_FAT	GO:0007088~regulation of mitosis	14	1.07034	0.000905237	ENSG00000135476, ENSG00000138778, ENSG00000100462, ENSG00000158402, ENSG00000117724, ENSG00000185513, ENSG00000138182, ENSG00000169679, ENSG00000180198, ENSG00000112742, ENSG00000137804, ENSG00000117650, ENSG00000164109, ENSG00000126787	1031	40	8117	2.75553	0.941634	0.049467	1.62553
GOTERM_BP_FAT	GO:0051783~regulation of nuclear division	14	1.07034	0.000905237	ENSG00000135476, ENSG00000138778, ENSG00000100462, ENSG00000158402, ENSG00000117724, ENSG00000185513, ENSG00000138182, ENSG00000169679, ENSG00000180198, ENSG00000112742, ENSG00000137804, ENSG00000117650, ENSG00000164109, ENSG00000126787	1031	40	8117	2.75553	0.941634	0.049467	1.62553
GOTERM_BP_FAT	GO:0031577~spindle checkpoint	6	0.458716	0.0119574	ENSG00000089685, ENSG00000138778, ENSG00000117724, ENSG00000169679, ENSG00000112742, ENSG00000164109	1031	12	8117	3.93647	1	0.316943	19.5624
GOTERM_BP_FAT	GO:0010948~negative regulation of cell cycle process	8	0.611621	0.0202532	ENSG00000012048, ENSG00000138778, ENSG00000135476, ENSG00000117724, ENSG00000169679, ENSG00000180447, ENSG00000112742, ENSG00000164109	1031	23	8117	2.73841	1	0.414265	30.9453
GOTERM_BP_FAT	GO:0045786~negative regulation of cell cycle	15	1.14679	0.0349425	ENSG00000150593, ENSG00000138778, ENSG00000117724, ENSG00000169679, ENSG00000180447, ENSG00000164305, ENSG00000112742, ENSG00000154640, ENSG00000101144, ENSG00000105810, ENSG00000143514, ENSG00000141510, ENSG00000116478, ENSG00000164109, ENSG00000112312	1031	66	8117	1.7893	1	0.546752	47.4623
GOTERM_BP_FAT	GO:0007094~mitotic cell cycle spindle assembly checkpoint	5	0.382263	0.0408043	ENSG00000138778, ENSG00000117724, ENSG00000169679, ENSG00000112742, ENSG00000164109	1031	11	8117	3.57861	1	0.593957	52.947
GOTERM_BP_FAT	GO:0045841~negative regulation of mitotic metaphase/anaphase transition	5	0.382263	0.0408043	ENSG00000138778, ENSG00000117724, ENSG00000169679, ENSG00000112742, ENSG00000164109	1031	11	8117	3.57861	1	0.593957	52.947
GOTERM_BP_FAT	GO:0010639~negative regulation of organelle organization	15	1.14679	0.04385	ENSG00000138778, ENSG00000135476, ENSG00000117724, ENSG00000169679, ENSG00000042493, ENSG00000112742, ENSG00000137710, ENSG00000050405, ENSG00000012048, ENSG00000170989, ENSG00000181163, ENSG00000119335, ENSG00000101871, ENSG00000116489, ENSG00000164109	1031	68	8117	1.73668	1	0.603637	55.5784
GOTERM_BP_FAT	GO:0030071~regulation of mitotic metaphase/anaphase transition	7	0.535168	0.05119	ENSG00000138778, ENSG00000135476, ENSG00000117724, ENSG00000169679, ENSG00000112742, ENSG00000164109, ENSG00000126787	1031	22	8117	2.50503	1	0.636247	61.3606
GOTERM_BP_FAT	GO:0051784~negative regulation of nuclear division	5	0.382263	0.0552278	ENSG00000138778, ENSG00000117724, ENSG00000169679, ENSG00000112742, ENSG00000164109	1031	12	8117	3.28039	1	0.66044	64.2305
GOTERM_BP_FAT	GO:0045839~negative regulation of mitosis	5	0.382263	0.0552278	ENSG00000138778, ENSG00000117724, ENSG00000169679, ENSG00000112742, ENSG00000164109	1031	12	8117	3.28039	1	0.66044	64.2305
Annotation Cluster 34	Enrichment Score: 1.8110252376567275
Category	Term	Count	%	PValue	Genes	List Total	Pop Hits	Pop Total	Fold Enrichment	Bonferroni	Benjamini	FDR
GOTERM_BP_FAT	GO:0007155~cell adhesion	68	5.19878	0.00591355	ENSG00000107736, ENSG00000111859, ENSG00000138795, ENSG00000138448, ENSG00000138696, ENSG00000129474, ENSG00000198561, ENSG00000160783, ENSG00000073712, ENSG00000172037, ENSG00000087077, ENSG00000197565, ENSG00000142871, ENSG00000131669, ENSG00000154721, ENSG00000148600, ENSG00000092820, ENSG00000044115, ENSG00000143545, ENSG00000153721, ENSG00000040731, ENSG00000179242, ENSG00000169231, ENSG0000…	1031	392	8117	1.36571	1	0.203	10.1772
GOTERM_BP_FAT	GO:0022610~biological adhesion	68	5.19878	0.0062536	ENSG00000107736, ENSG00000111859, ENSG00000138795, ENSG00000138448, ENSG00000138696, ENSG00000129474, ENSG00000198561, ENSG00000160783, ENSG00000073712, ENSG00000172037, ENSG00000087077, ENSG00000197565, ENSG00000142871, ENSG00000131669, ENSG00000154721, ENSG00000148600, ENSG00000092820, ENSG00000044115, ENSG00000143545, ENSG00000153721, ENSG00000040731, ENSG00000179242, ENSG00000169231, ENSG0000…	1031	393	8117	1.36224	1	0.206673	10.7316
SP_PIR_KEYWORDS	cell adhesion	35	2.67584	0.0997576	ENSG00000107736, ENSG00000111859, ENSG00000138448, ENSG00000046604, ENSG00000129474, ENSG00000198561, ENSG00000087077, ENSG00000172037, ENSG00000073712, ENSG00000197565, ENSG00000167614, ENSG00000101680, ENSG00000177707, ENSG00000142871, ENSG00000131669, ENSG00000148600, ENSG00000044115, ENSG00000040731, ENSG00000179242, ENSG00000169231, ENSG00000144857, ENSG00000120896, ENSG00000053747, ENSG0000…	1305	232	11119	1.28539	1	0.599072	78.6198
Annotation Cluster 35	Enrichment Score: 1.7341039763481052
Category	Term	Count	%	PValue	Genes	List Total	Pop Hits	Pop Total	Fold Enrichment	Bonferroni	Benjamini	FDR
GOTERM_MF_FAT	GO:0004527~exonuclease activity	12	0.917431	0.0101427	ENSG00000120699, ENSG00000152457, ENSG00000181026, ENSG00000104626, ENSG00000020922, ENSG00000196678, ENSG00000174371, ENSG00000197594, ENSG00000005189, ENSG00000168496, ENSG00000165392, ENSG00000042088	943	42	7713	2.33692	0.999971	0.502073	14.9216
SP_PIR_KEYWORDS	exonuclease	10	0.764526	0.0115138	ENSG00000120699, ENSG00000152457, ENSG00000181026, ENSG00000104626, ENSG00000020922, ENSG00000196678, ENSG00000174371, ENSG00000005189, ENSG00000168496, ENSG00000042088	1305	33	11119	2.58191	0.998702	0.168602	15.6335
GOTERM_MF_FAT	GO:0004518~nuclease activity	23	1.75841	0.0126414	ENSG00000178295, ENSG00000181026, ENSG00000119203, ENSG00000104626, ENSG00000121988, ENSG00000154920, ENSG00000145907, ENSG00000168496, ENSG00000005189, ENSG00000042088, ENSG00000187790, ENSG00000120699, ENSG00000152457, ENSG00000138346, ENSG00000124787, ENSG00000196678, ENSG00000020922, ENSG00000149273, ENSG00000132541, ENSG00000174371, ENSG00000197594, ENSG00000165392, ENSG00000104889	943	110	7713	1.7102	0.999998	0.496911	18.2629
SP_PIR_KEYWORDS	nuclease	16	1.22324	0.0142969	ENSG00000178295, ENSG00000104626, ENSG00000119203, ENSG00000181026, ENSG00000154920, ENSG00000145907, ENSG00000168496, ENSG00000005189, ENSG00000042088, ENSG00000120699, ENSG00000152457, ENSG00000020922, ENSG00000196678, ENSG00000132541, ENSG00000174371, ENSG00000104889	1305	70	11119	1.9475	0.999743	0.200202	19.0541
SP_PIR_KEYWORDS	Endonuclease	10	0.764526	0.0387805	ENSG00000152457, ENSG00000178295, ENSG00000119203, ENSG00000020922, ENSG00000132541, ENSG00000154920, ENSG00000174371, ENSG00000145907, ENSG00000168496, ENSG00000104889	1305	40	11119	2.13008	1	0.376859	44.0447
GOTERM_MF_FAT	GO:0004519~endonuclease activity	14	1.07034	0.0481228	ENSG00000178295, ENSG00000119203, ENSG00000121988, ENSG00000154920, ENSG00000145907, ENSG00000168496, ENSG00000138346, ENSG00000152457, ENSG00000124787, ENSG00000020922, ENSG00000149273, ENSG00000132541, ENSG00000174371, ENSG00000104889	943	65	7713	1.76168	1	0.784195	54.2409
Annotation Cluster 36	Enrichment Score: 1.6246910036966928
Category	Term	Count	%	PValue	Genes	List Total	Pop Hits	Pop Total	Fold Enrichment	Bonferroni	Benjamini	FDR
INTERPRO	IPR000910:High mobility group, HMG1/HMG2	11	0.840979	0.0119407	ENSG00000152284, ENSG00000124191, ENSG00000138795, ENSG00000189403, ENSG00000109685, ENSG00000064961, ENSG00000055609, ENSG00000164104, ENSG00000110693, ENSG00000198554, ENSG00000181449	1160	39	9941	2.41713	1	0.756217	18.2758
SMART	SM00398:HMG	11	0.840979	0.0152681	ENSG00000152284, ENSG00000124191, ENSG00000138795, ENSG00000189403, ENSG00000109685, ENSG00000064961, ENSG00000055609, ENSG00000164104, ENSG00000110693, ENSG00000198554, ENSG00000181449	673	39	5547	2.32472	0.989952	0.601512	18.5758
UP_SEQ_FEATURE	DNA-binding region:HMG box	8	0.611621	0.0733013	ENSG00000152284, ENSG00000124191, ENSG00000138795, ENSG00000109685, ENSG00000064961, ENSG00000110693, ENSG00000198554, ENSG00000181449	1304	32	11114	2.13075	1	0.999907	74.9658
Annotation Cluster 37	Enrichment Score: 1.5230141501616818
Category	Term	Count	%	PValue	Genes	List Total	Pop Hits	Pop Total	Fold Enrichment	Bonferroni	Benjamini	FDR
INTERPRO	IPR003593:ATPase, AAA+ type, core	22	1.68196	0.0182291	ENSG00000182185, ENSG00000145375, ENSG00000071539, ENSG00000085840, ENSG00000049541, ENSG00000161204, ENSG00000135776, ENSG00000187240, ENSG00000165916, ENSG00000133119, ENSG00000176208, ENSG00000156802, ENSG00000144452, ENSG00000163918, ENSG00000035928, ENSG00000125257, ENSG00000125885, ENSG00000111445, ENSG00000112118, ENSG00000104738, ENSG00000166508, ENSG00000102763	1160	112	9941	1.68336	1	0.849151	26.5885
SMART	SM00382:AAA	22	1.68196	0.0261875	ENSG00000182185, ENSG00000145375, ENSG00000071539, ENSG00000085840, ENSG00000049541, ENSG00000161204, ENSG00000135776, ENSG00000187240, ENSG00000165916, ENSG00000133119, ENSG00000176208, ENSG00000156802, ENSG00000144452, ENSG00000163918, ENSG00000035928, ENSG00000125257, ENSG00000125885, ENSG00000111445, ENSG00000112118, ENSG00000104738, ENSG00000166508, ENSG00000102763	673	112	5547	1.619	0.999642	0.678091	29.8425
INTERPRO	IPR003959:ATPase, AAA-type, core	10	0.764526	0.0565064	ENSG00000165916, ENSG00000176208, ENSG00000156802, ENSG00000035928, ENSG00000163918, ENSG00000145375, ENSG00000071539, ENSG00000085840, ENSG00000111445, ENSG00000049541	1160	43	9941	1.99298	1	0.981441	62.3648
Annotation Cluster 38	Enrichment Score: 1.5095213951845754
Category	Term	Count	%	PValue	Genes	List Total	Pop Hits	Pop Total	Fold Enrichment	Bonferroni	Benjamini	FDR
GOTERM_CC_FAT	GO:0030055~cell-substrate junction	18	1.37615	0.00785241	ENSG00000111859, ENSG00000112851, ENSG00000126878, ENSG00000115641, ENSG00000137575, ENSG00000079308, ENSG00000129474, ENSG00000050405, ENSG00000120896, ENSG00000053747, ENSG00000073712, ENSG00000087077, ENSG00000137337, ENSG00000079999, ENSG00000072110, ENSG00000121060, ENSG00000164171, ENSG00000035403	906	74	7303	1.96071	0.98443	0.115227	10.8093
GOTERM_CC_FAT	GO:0005925~focal adhesion	17	1.29969	0.00889102	ENSG00000111859, ENSG00000126878, ENSG00000115641, ENSG00000137575, ENSG00000079308, ENSG00000129474, ENSG00000050405, ENSG00000120896, ENSG00000053747, ENSG00000073712, ENSG00000087077, ENSG00000137337, ENSG00000079999, ENSG00000072110, ENSG00000121060, ENSG00000164171, ENSG00000035403	906	69	7303	1.98597	0.991044	0.126046	12.1546
GOTERM_CC_FAT	GO:0016323~basolateral plasma membrane	26	1.98777	0.00978593	ENSG00000111859, ENSG00000112851, ENSG00000126878, ENSG00000129474, ENSG00000050405, ENSG00000079215, ENSG00000073712, ENSG00000087077, ENSG00000064651, ENSG00000104067, ENSG00000141736, ENSG00000115641, ENSG00000137575, ENSG00000079308, ENSG00000120896, ENSG00000053747, ENSG00000086062, ENSG00000137337, ENSG00000198648, ENSG00000165240, ENSG00000079999, ENSG00000197594, ENSG00000072110, ENSG0000…	906	125	7303	1.67663	0.994441	0.134315	13.2986
GOTERM_CC_FAT	GO:0005924~cell-substrate adherens junction	17	1.29969	0.0117453	ENSG00000111859, ENSG00000126878, ENSG00000115641, ENSG00000137575, ENSG00000079308, ENSG00000129474, ENSG00000050405, ENSG00000120896, ENSG00000053747, ENSG00000073712, ENSG00000087077, ENSG00000137337, ENSG00000079999, ENSG00000072110, ENSG00000121060, ENSG00000164171, ENSG00000035403	906	71	7303	1.93003	0.998047	0.151396	15.755
GOTERM_CC_FAT	GO:0070161~anchoring junction	24	1.83486	0.0142439	ENSG00000111859, ENSG00000044115, ENSG00000126878, ENSG00000115641, ENSG00000137575, ENSG00000079308, ENSG00000046604, ENSG00000129474, ENSG00000050405, ENSG00000120896, ENSG00000053747, ENSG00000087077, ENSG00000073712, ENSG00000086062, ENSG00000137337, ENSG00000148498, ENSG00000138771, ENSG00000079999, ENSG00000177707, ENSG00000072110, ENSG00000121060, ENSG00000104067, ENSG00000164171, ENSG0000…	906	116	7303	1.66773	0.999487	0.172521	18.7936
GOTERM_CC_FAT	GO:0005912~adherens junction	22	1.68196	0.0251346	ENSG00000111859, ENSG00000044115, ENSG00000126878, ENSG00000115641, ENSG00000137575, ENSG00000079308, ENSG00000129474, ENSG00000050405, ENSG00000120896, ENSG00000053747, ENSG00000087077, ENSG00000073712, ENSG00000137337, ENSG00000148498, ENSG00000138771, ENSG00000079999, ENSG00000177707, ENSG00000072110, ENSG00000121060, ENSG00000104067, ENSG00000164171, ENSG00000035403	906	109	7303	1.62693	0.999999	0.258205	30.8839
GOTERM_CC_FAT	GO:0030054~cell junction	40	3.0581	0.529335	ENSG00000111859, ENSG00000112851, ENSG00000126878, ENSG00000046604, ENSG00000085552, ENSG00000129474, ENSG00000020577, ENSG00000050405, ENSG00000087077, ENSG00000073712, ENSG00000072415, ENSG00000149927, ENSG00000138771, ENSG00000177707, ENSG00000104067, ENSG00000109099, ENSG00000154721, ENSG00000044115, ENSG00000143545, ENSG00000115641, ENSG00000153721, ENSG00000137575, ENSG00000116117, ENSG0000…	906	315	7303	1.02358	1	0.963698	99.9982
SP_PIR_KEYWORDS	cell junction	29	2.21713	0.551796	ENSG00000154721, ENSG00000044115, ENSG00000111859, ENSG00000143545, ENSG00000112851, ENSG00000153721, ENSG00000137575, ENSG00000116117, ENSG00000046604, ENSG00000079308, ENSG00000085552, ENSG00000152818, ENSG00000129474, ENSG00000020577, ENSG00000120896, ENSG00000050405, ENSG00000138758, ENSG00000147027, ENSG00000087077, ENSG00000073712, ENSG00000072415, ENSG00000103528, ENSG00000149927, ENSG0000…	1305	241	11119	1.02527	1	0.962756	99.9992
Annotation Cluster 39	Enrichment Score: 1.5057486047934447
Category	Term	Count	%	PValue	Genes	List Total	Pop Hits	Pop Total	Fold Enrichment	Bonferroni	Benjamini	FDR
GOTERM_MF_FAT	GO:0008092~cytoskeletal protein binding	59	4.5107	0.0136278	ENSG00000125703, ENSG00000139734, ENSG00000126878, ENSG00000095777, ENSG00000122786, ENSG00000128641, ENSG00000050405, ENSG00000197321, ENSG00000121621, ENSG00000117519, ENSG00000115935, ENSG00000169439, ENSG00000145555, ENSG00000167460, ENSG00000092820, ENSG00000044115, ENSG00000120756, ENSG00000137575, ENSG00000042493, ENSG00000072864, ENSG00000152818, ENSG00000134222, ENSG00000086062, ENSG0000…	943	358	7713	1.34797	0.999999	0.505355	19.5477
GOTERM_MF_FAT	GO:0003779~actin binding	37	2.82875	0.0373237	ENSG00000139734, ENSG00000118579, ENSG00000126878, ENSG00000095777, ENSG00000122786, ENSG00000128641, ENSG00000050405, ENSG00000129116, ENSG00000197321, ENSG00000071127, ENSG00000163110, ENSG00000145703, ENSG00000138771, ENSG00000133627, ENSG00000157483, ENSG00000121621, ENSG00000117519, ENSG00000133392, ENSG00000115935, ENSG00000145555, ENSG00000167460, ENSG00000092820, ENSG00000120756, ENSG0000…	943	219	7713	1.38188	1	0.727714	45.2809
SP_PIR_KEYWORDS	actin-binding	29	2.21713	0.0392145	ENSG00000118579, ENSG00000126878, ENSG00000095777, ENSG00000122786, ENSG00000128641, ENSG00000050405, ENSG00000129116, ENSG00000197321, ENSG00000071127, ENSG00000138771, ENSG00000133627, ENSG00000157483, ENSG00000117519, ENSG00000133392, ENSG00000115935, ENSG00000145555, ENSG00000167460, ENSG00000120756, ENSG00000079308, ENSG00000042493, ENSG00000152818, ENSG00000137710, ENSG00000054654, ENSG0000…	1305	170	11119	1.45346	1	0.368241	44.4145
GOTERM_CC_FAT	GO:0015629~actin cytoskeleton	31	2.37003	0.0475497	ENSG00000196923, ENSG00000126878, ENSG00000095777, ENSG00000122786, ENSG00000128641, ENSG00000050405, ENSG00000138758, ENSG00000129116, ENSG00000197321, ENSG00000073712, ENSG00000163110, ENSG00000145703, ENSG00000157483, ENSG00000101608, ENSG00000133392, ENSG00000115935, ENSG00000145555, ENSG00000167460, ENSG00000148935, ENSG00000092820, ENSG00000132434, ENSG00000044115, ENSG00000119326, ENSG0000…	906	178	7303	1.40383	1	0.378952	50.6841
Annotation Cluster 40	Enrichment Score: 1.5018668477296484
Category	Term	Count	%	PValue	Genes	List Total	Pop Hits	Pop Total	Fold Enrichment	Bonferroni	Benjamini	FDR
GOTERM_BP_FAT	GO:0045596~negative regulation of cell differentiation	34	2.59939	3.97669e-05	ENSG00000106571, ENSG00000138448, ENSG00000084093, ENSG00000107779, ENSG00000066279, ENSG00000074047, ENSG00000142611, ENSG00000128791, ENSG00000148516, ENSG00000197061, ENSG00000116478, ENSG00000110092, ENSG00000106462, ENSG00000067560, ENSG00000164199, ENSG00000136826, ENSG00000162775, ENSG00000068024, ENSG00000114315, ENSG00000074181, ENSG00000181449, ENSG00000197921, ENSG00000172201, ENSG0000…	1031	128	8117	2.09125	0.117284	0.00327754	0.0719388
GOTERM_BP_FAT	GO:0045665~negative regulation of neuron differentiation	10	0.764526	0.000580357	ENSG00000084093, ENSG00000066279, ENSG00000074181, ENSG00000112333, ENSG00000114315, ENSG00000181449, ENSG00000197921, ENSG00000172201, ENSG00000067560, ENSG00000148400	1031	21	8117	3.74902	0.838154	0.035078	1.04504
GOTERM_BP_FAT	GO:0060284~regulation of cell development	31	2.37003	0.00305537	ENSG00000196584, ENSG00000118971, ENSG00000084093, ENSG00000184486, ENSG00000196419, ENSG00000074047, ENSG00000066279, ENSG00000107779, ENSG00000116478, ENSG00000128602, ENSG00000067560, ENSG00000177426, ENSG00000179242, ENSG00000068024, ENSG00000144857, ENSG00000074181, ENSG00000114315, ENSG00000181449, ENSG00000197921, ENSG00000048052, ENSG00000172201, ENSG00000086062, ENSG00000136861, ENSG0000…	1031	142	8117	1.71874	0.999932	0.128146	5.38701
GOTERM_BP_FAT	GO:0051960~regulation of nervous system development	26	1.98777	0.0209135	ENSG00000196584, ENSG00000118971, ENSG00000084093, ENSG00000184486, ENSG00000196419, ENSG00000074047, ENSG00000066279, ENSG00000107779, ENSG00000078246, ENSG00000128602, ENSG00000067560, ENSG00000177426, ENSG00000179242, ENSG00000074181, ENSG00000114315, ENSG00000197921, ENSG00000181449, ENSG00000172201, ENSG00000136861, ENSG00000101144, ENSG00000040608, ENSG00000141510, ENSG00000143947, ENSG0000…	1031	130	8117	1.57459	1	0.421864	31.7826
GOTERM_BP_FAT	GO:0050767~regulation of neurogenesis	23	1.75841	0.0305921	ENSG00000196584, ENSG00000118971, ENSG00000177426, ENSG00000084093, ENSG00000179242, ENSG00000184486, ENSG00000196419, ENSG00000066279, ENSG00000074047, ENSG00000107779, ENSG00000074181, ENSG00000114315, ENSG00000181449, ENSG00000197921, ENSG00000172201, ENSG00000136861, ENSG00000101144, ENSG00000040608, ENSG00000141510, ENSG00000128602, ENSG00000112333, ENSG00000067560, ENSG00000148400	1031	115	8117	1.57459	1	0.519452	43.0074
GOTERM_BP_FAT	GO:0045664~regulation of neuron differentiation	17	1.29969	0.134031	ENSG00000118971, ENSG00000177426, ENSG00000084093, ENSG00000179242, ENSG00000184486, ENSG00000074047, ENSG00000066279, ENSG00000074181, ENSG00000114315, ENSG00000197921, ENSG00000181449, ENSG00000172201, ENSG00000136861, ENSG00000040608, ENSG00000112333, ENSG00000067560, ENSG00000148400	1031	94	8117	1.42383	1	0.875113	92.6036
GOTERM_BP_FAT	GO:0050769~positive regulation of neurogenesis	7	0.535168	0.515117	ENSG00000196584, ENSG00000179242, ENSG00000196419, ENSG00000128602, ENSG00000181449, ENSG00000067560, ENSG00000148400	1031	45	8117	1.22468	1	0.997083	99.9998
GOTERM_BP_FAT	GO:0045597~positive regulation of cell differentiation	17	1.29969	0.65497	ENSG00000106571, ENSG00000196584, ENSG00000196923, ENSG00000177426, ENSG00000138696, ENSG00000179242, ENSG00000196419, ENSG00000107779, ENSG00000074047, ENSG00000144857, ENSG00000181449, ENSG00000101144, ENSG00000138685, ENSG00000143772, ENSG00000128602, ENSG00000067560, ENSG00000148400	1031	135	8117	0.991407	1	0.999338	100
GOTERM_BP_FAT	GO:0010720~positive regulation of cell development	7	0.535168	0.679822	ENSG00000196584, ENSG00000179242, ENSG00000196419, ENSG00000128602, ENSG00000181449, ENSG00000067560, ENSG00000148400	1031	53	8117	1.03982	1	0.999532	100
GOTERM_BP_FAT	GO:0051094~positive regulation of developmental process	20	1.52905	0.690693	ENSG00000106571, ENSG00000196584, ENSG00000196923, ENSG00000177426, ENSG00000138696, ENSG00000179242, ENSG00000196419, ENSG00000074047, ENSG00000107779, ENSG00000144857, ENSG00000181449, ENSG00000048052, ENSG00000086062, ENSG00000101144, ENSG00000138685, ENSG00000143772, ENSG00000128602, ENSG00000135547, ENSG00000067560, ENSG00000148400	1031	163	8117	0.966005	1	0.999576	100
Annotation Cluster 41	Enrichment Score: 1.4985450654557668
Category	Term	Count	%	PValue	Genes	List Total	Pop Hits	Pop Total	Fold Enrichment	Bonferroni	Benjamini	FDR
GOTERM_BP_FAT	GO:0001708~cell fate specification	8	0.611621	0.00655092	ENSG00000106571, ENSG00000103449, ENSG00000138685, ENSG00000074047, ENSG00000128602, ENSG00000181449, ENSG00000164056, ENSG00000148400	1031	19	8117	3.31492	1	0.210998	11.2137
GOTERM_BP_FAT	GO:0045168~cell-cell signaling involved in cell fate specification	4	0.30581	0.0698283	ENSG00000103449, ENSG00000138685, ENSG00000181449, ENSG00000164056	1031	8	8117	3.93647	1	0.724784	73.0158
GOTERM_BP_FAT	GO:0031128~developmental induction	4	0.30581	0.0698283	ENSG00000103449, ENSG00000138685, ENSG00000181449, ENSG00000164056	1031	8	8117	3.93647	1	0.724784	73.0158
Annotation Cluster 42	Enrichment Score: 1.4797244965439784
Category	Term	Count	%	PValue	Genes	List Total	Pop Hits	Pop Total	Fold Enrichment	Bonferroni	Benjamini	FDR
GOTERM_MF_FAT	GO:0004527~exonuclease activity	12	0.917431	0.0101427	ENSG00000120699, ENSG00000152457, ENSG00000181026, ENSG00000104626, ENSG00000020922, ENSG00000196678, ENSG00000174371, ENSG00000197594, ENSG00000005189, ENSG00000168496, ENSG00000165392, ENSG00000042088	943	42	7713	2.33692	0.999971	0.502073	14.9216
SP_PIR_KEYWORDS	exonuclease	10	0.764526	0.0115138	ENSG00000120699, ENSG00000152457, ENSG00000181026, ENSG00000104626, ENSG00000020922, ENSG00000196678, ENSG00000174371, ENSG00000005189, ENSG00000168496, ENSG00000042088	1305	33	11119	2.58191	0.998702	0.168602	15.6335
INTERPRO	IPR006055:Exonuclease	4	0.30581	0.0564416	ENSG00000181026, ENSG00000104626, ENSG00000196678, ENSG00000005189	1160	8	9941	4.28491	1	0.984317	62.3213
INTERPRO	IPR013520:Exonuclease, RNase T and DNA polymerase III	4	0.30581	0.0564416	ENSG00000181026, ENSG00000104626, ENSG00000196678, ENSG00000005189	1160	8	9941	4.28491	1	0.984317	62.3213
UP_SEQ_FEATURE	domain:Exonuclease	4	0.30581	0.0572527	ENSG00000181026, ENSG00000104626, ENSG00000196678, ENSG00000005189	1304	8	11114	4.2615	1	0.999783	65.7871
SMART	SM00479:EXOIII	4	0.30581	0.0621278	ENSG00000181026, ENSG00000104626, ENSG00000196678, ENSG00000005189	673	8	5547	4.1211	1	0.853075	57.5435
Annotation Cluster 43	Enrichment Score: 1.4713731857472216
Category	Term	Count	%	PValue	Genes	List Total	Pop Hits	Pop Total	Fold Enrichment	Bonferroni	Benjamini	FDR
GOTERM_BP_FAT	GO:0048589~developmental growth	13	0.993884	0.0145678	ENSG00000106571, ENSG00000171766, ENSG00000138696, ENSG00000139618, ENSG00000180447, ENSG00000074047, ENSG00000074181, ENSG00000134057, ENSG00000172037, ENSG00000101003, ENSG00000128602, ENSG00000148400, ENSG00000131669	1031	48	8117	2.13225	1	0.35228	23.3226
GOTERM_BP_FAT	GO:0031099~regeneration	11	0.840979	0.0290393	ENSG00000113594, ENSG00000171766, ENSG00000038427, ENSG00000110092, ENSG00000074181, ENSG00000134057, ENSG00000128602, ENSG00000145386, ENSG00000131669, ENSG00000148400, ENSG00000172037	1031	41	8117	2.11225	1	0.508904	41.3325
GOTERM_BP_FAT	GO:0042246~tissue regeneration	5	0.382263	0.091096	ENSG00000171766, ENSG00000074181, ENSG00000134057, ENSG00000131669, ENSG00000148400	1031	14	8117	2.81176	1	0.789988	82.2446
Annotation Cluster 44	Enrichment Score: 1.4701196571683186
Category	Term	Count	%	PValue	Genes	List Total	Pop Hits	Pop Total	Fold Enrichment	Bonferroni	Benjamini	FDR
GOTERM_BP_FAT	GO:0021513~spinal cord dorsal/ventral patterning	5	0.382263	0.00115932	ENSG00000106571, ENSG00000112210, ENSG00000078246, ENSG00000074047, ENSG00000128602	1031	5	8117	7.87294	0.973718	0.0598126	2.07727
GOTERM_BP_FAT	GO:0021510~spinal cord development	8	0.611621	0.00655092	ENSG00000106571, ENSG00000112210, ENSG00000078246, ENSG00000111783, ENSG00000074047, ENSG00000128602, ENSG00000092621, ENSG00000167081	1031	19	8117	3.31492	1	0.210998	11.2137
GOTERM_BP_FAT	GO:0021511~spinal cord patterning	5	0.382263	0.00656648	ENSG00000106571, ENSG00000112210, ENSG00000078246, ENSG00000074047, ENSG00000128602	1031	7	8117	5.62353	1	0.209312	11.2388
GOTERM_BP_FAT	GO:0042475~odontogenesis of dentine-containing tooth	7	0.535168	0.0415308	ENSG00000106571, ENSG00000101144, ENSG00000178522, ENSG00000138795, ENSG00000107779, ENSG00000074047, ENSG00000128602	1031	21	8117	2.62431	1	0.593059	53.5877
GOTERM_BP_FAT	GO:0042476~odontogenesis	9	0.688073	0.0423485	ENSG00000106571, ENSG00000101144, ENSG00000178522, ENSG00000138795, ENSG00000107779, ENSG00000074047, ENSG00000128602, ENSG00000165512, ENSG00000160783	1031	32	8117	2.21426	1	0.597887	54.2991
GOTERM_BP_FAT	GO:0021910~smoothened signaling pathway involved in ventral spinal cord patterning	3	0.229358	0.0441893	ENSG00000106571, ENSG00000074047, ENSG00000128602	1031	3	8117	7.87294	1	0.601734	55.8628
GOTERM_BP_FAT	GO:0021904~dorsal/ventral neural tube patterning	4	0.30581	0.0480763	ENSG00000078246, ENSG00000180447, ENSG00000074047, ENSG00000128602	1031	7	8117	4.49882	1	0.624026	59.0005
KEGG_PATHWAY	hsa04340:Hedgehog signaling pathway	7	0.535168	0.201092	ENSG00000106571, ENSG00000101144, ENSG00000043355, ENSG00000112210, ENSG00000180447, ENSG00000074047, ENSG00000128602	394	30	2952	1.74822	1	0.770714	93.4281
GOTERM_BP_FAT	GO:0007224~smoothened signaling pathway	4	0.30581	0.222516	ENSG00000106571, ENSG00000064393, ENSG00000074047, ENSG00000128602	1031	13	8117	2.42244	1	0.955877	98.9482
BIOCARTA	h_shhPathway:Sonic Hedgehog (Shh) Pathway	3	0.229358	0.238645	ENSG00000106571, ENSG00000074047, ENSG00000128602	145	6	920	3.17241	1	0.972757	96.5741
Annotation Cluster 45	Enrichment Score: 1.4555752012543761
Category	Term	Count	%	PValue	Genes	List Total	Pop Hits	Pop Total	Fold Enrichment	Bonferroni	Benjamini	FDR
GOTERM_BP_FAT	GO:0001708~cell fate specification	8	0.611621	0.00655092	ENSG00000106571, ENSG00000103449, ENSG00000138685, ENSG00000074047, ENSG00000128602, ENSG00000181449, ENSG00000164056, ENSG00000148400	1031	19	8117	3.31492	1	0.210998	11.2137
GOTERM_BP_FAT	GO:0021936~regulation of granule cell precursor proliferation	3	0.229358	0.0810002	ENSG00000138685, ENSG00000074047, ENSG00000128602	1031	4	8117	5.9047	1	0.761247	78.3157
GOTERM_BP_FAT	GO:0021940~positive regulation of granule cell precursor proliferation	3	0.229358	0.0810002	ENSG00000138685, ENSG00000074047, ENSG00000128602	1031	4	8117	5.9047	1	0.761247	78.3157
Annotation Cluster 46	Enrichment Score: 1.3672576088466908
Category	Term	Count	%	PValue	Genes	List Total	Pop Hits	Pop Total	Fold Enrichment	Bonferroni	Benjamini	FDR
INTERPRO	IPR000818:TEA/ATTS	3	0.229358	0.0375849	ENSG00000007866, ENSG00000187079, ENSG00000074219	1160	3	9941	8.56983	1	0.957188	47.4617
INTERPRO	IPR016361:Transcriptional enhancer factor	3	0.229358	0.0375849	ENSG00000007866, ENSG00000187079, ENSG00000074219	1160	3	9941	8.56983	1	0.957188	47.4617
UP_SEQ_FEATURE	DNA-binding region:TEA	3	0.229358	0.037991	ENSG00000007866, ENSG00000187079, ENSG00000074219	1304	3	11114	8.52301	1	0.999446	50.5702
SMART	SM00426:TEA	3	0.229358	0.0404298	ENSG00000007866, ENSG00000187079, ENSG00000074219	673	3	5547	8.2422	0.999996	0.786145	42.3747
PIR_SUPERFAMILY	PIRSF002603:TEF	3	0.229358	0.0420236	ENSG00000007866, ENSG00000187079, ENSG00000074219	503	3	4060	8.07157	1	0.997149	46.5213
PIR_SUPERFAMILY	PIRSF002603:transcriptional enhancer factor	3	0.229358	0.0420236	ENSG00000007866, ENSG00000187079, ENSG00000074219	503	3	4060	8.07157	1	0.997149	46.5213
UP_SEQ_FEATURE	region of interest:Transcriptional activation	3	0.229358	0.0701137	ENSG00000007866, ENSG00000187079, ENSG00000074219	1304	4	11114	6.39225	1	0.99993	73.352
Annotation Cluster 47	Enrichment Score: 1.3348051256083104
Category	Term	Count	%	PValue	Genes	List Total	Pop Hits	Pop Total	Fold Enrichment	Bonferroni	Benjamini	FDR
INTERPRO	IPR006086:XPG I	3	0.229358	0.0375849	ENSG00000178295, ENSG00000174371, ENSG00000168496	1160	3	9941	8.56983	1	0.957188	47.4617
INTERPRO	IPR006084:DNA repair protein (XPGC)/yeast Rad	3	0.229358	0.0375849	ENSG00000178295, ENSG00000174371, ENSG00000168496	1160	3	9941	8.56983	1	0.957188	47.4617
INTERPRO	IPR019974:XPG conserved site	3	0.229358	0.0375849	ENSG00000178295, ENSG00000174371, ENSG00000168496	1160	3	9941	8.56983	1	0.957188	47.4617
INTERPRO	IPR008918:Helix-hairpin-helix motif, class 2	3	0.229358	0.0375849	ENSG00000178295, ENSG00000174371, ENSG00000168496	1160	3	9941	8.56983	1	0.957188	47.4617
UP_SEQ_FEATURE	region of interest:I-domain	3	0.229358	0.037991	ENSG00000178295, ENSG00000174371, ENSG00000168496	1304	3	11114	8.52301	1	0.999446	50.5702
SMART	SM00484:XPGI	3	0.229358	0.0404298	ENSG00000178295, ENSG00000174371, ENSG00000168496	673	3	5547	8.2422	0.999996	0.786145	42.3747
SMART	SM00279:HhH2	3	0.229358	0.0404298	ENSG00000178295, ENSG00000174371, ENSG00000168496	673	3	5547	8.2422	0.999996	0.786145	42.3747
INTERPRO	IPR006085:XPG N-terminal	3	0.229358	0.069397	ENSG00000178295, ENSG00000174371, ENSG00000168496	1160	4	9941	6.42737	1	0.987499	70.1311
UP_SEQ_FEATURE	region of interest:N-domain	3	0.229358	0.0701137	ENSG00000178295, ENSG00000174371, ENSG00000168496	1304	4	11114	6.39225	1	0.99993	73.352
SMART	SM00485:XPGN	3	0.229358	0.0744166	ENSG00000178295, ENSG00000174371, ENSG00000168496	673	4	5547	6.18165	1	0.854391	64.4009
Annotation Cluster 48	Enrichment Score: 1.3265469023286123
Category	Term	Count	%	PValue	Genes	List Total	Pop Hits	Pop Total	Fold Enrichment	Bonferroni	Benjamini	FDR
GOTERM_BP_FAT	GO:0007010~cytoskeleton organization	63	4.81651	0.000104497	ENSG00000138193, ENSG00000111859, ENSG00000196923, ENSG00000139734, ENSG00000112029, ENSG00000122786, ENSG00000050405, ENSG00000092036, ENSG00000197321, ENSG00000073712, ENSG00000122952, ENSG00000137822, ENSG00000156970, ENSG00000123416, ENSG00000121621, ENSG00000152253, ENSG00000174799, ENSG00000117519, ENSG00000115935, ENSG00000163545, ENSG00000092820, ENSG00000137575, ENSG00000072864, ENSG0000…	1031	307	8117	1.61562	0.279511	0.00796387	0.188933
GOTERM_BP_FAT	GO:0007015~actin filament organization	9	0.688073	0.297443	ENSG00000092820, ENSG00000111859, ENSG00000154553, ENSG00000122786, ENSG00000149798, ENSG00000050405, ENSG00000072110, ENSG00000115935, ENSG00000067560	1031	50	8117	1.41713	1	0.977756	99.8319
GOTERM_BP_FAT	GO:0030029~actin filament-based process	23	1.75841	0.38879	ENSG00000092820, ENSG00000111859, ENSG00000139734, ENSG00000196923, ENSG00000161800, ENSG00000137575, ENSG00000122786, ENSG00000126785, ENSG00000050405, ENSG00000073712, ENSG00000154553, ENSG00000149798, ENSG00000147202, ENSG00000115963, ENSG00000138771, ENSG00000157483, ENSG00000116489, ENSG00000072110, ENSG00000117519, ENSG00000133392, ENSG00000115935, ENSG00000163545, ENSG00000067560	1031	161	8117	1.12471	1	0.991365	99.9865
GOTERM_BP_FAT	GO:0030036~actin cytoskeleton organization	22	1.68196	0.408872	ENSG00000092820, ENSG00000111859, ENSG00000139734, ENSG00000196923, ENSG00000161800, ENSG00000137575, ENSG00000122786, ENSG00000126785, ENSG00000050405, ENSG00000073712, ENSG00000154553, ENSG00000149798, ENSG00000147202, ENSG00000115963, ENSG00000138771, ENSG00000116489, ENSG00000072110, ENSG00000117519, ENSG00000133392, ENSG00000115935, ENSG00000163545, ENSG00000067560	1031	155	8117	1.11745	1	0.992935	99.9926
Annotation Cluster 49	Enrichment Score: 1.3199588988062936
Category	Term	Count	%	PValue	Genes	List Total	Pop Hits	Pop Total	Fold Enrichment	Bonferroni	Benjamini	FDR
GOTERM_BP_FAT	GO:0000079~regulation of cyclin-dependent protein kinase activity	14	1.07034	0.00370409	ENSG00000118971, ENSG00000164045, ENSG00000149554, ENSG00000164305, ENSG00000123975, ENSG00000123080, ENSG00000175305, ENSG00000137193, ENSG00000158402, ENSG00000173207, ENSG00000100526, ENSG00000110092, ENSG00000197299, ENSG00000113328	1031	46	8117	2.39611	0.999991	0.147404	6.49494
GOTERM_MF_FAT	GO:0016538~cyclin-dependent protein kinase regulator activity	6	0.458716	0.0101725	ENSG00000173207, ENSG00000164305, ENSG00000110092, ENSG00000123975, ENSG00000123080, ENSG00000175305	943	12	7713	4.08961	0.999972	0.480897	14.9622
GOTERM_MF_FAT	GO:0019887~protein kinase regulator activity	10	0.764526	0.307773	ENSG00000109911, ENSG00000173207, ENSG00000141198, ENSG00000164305, ENSG00000110092, ENSG00000123975, ENSG00000064199, ENSG00000123080, ENSG00000102580, ENSG00000175305	943	60	7713	1.3632	1	0.995085	99.7064
GOTERM_MF_FAT	GO:0019207~kinase regulator activity	10	0.764526	0.452715	ENSG00000109911, ENSG00000173207, ENSG00000141198, ENSG00000164305, ENSG00000110092, ENSG00000123975, ENSG00000064199, ENSG00000123080, ENSG00000102580, ENSG00000175305	943	68	7713	1.20283	1	0.997939	99.9929
Annotation Cluster 50	Enrichment Score: 1.2869683889615693
Category	Term	Count	%	PValue	Genes	List Total	Pop Hits	Pop Total	Fold Enrichment	Bonferroni	Benjamini	FDR
GOTERM_BP_FAT	GO:0030900~forebrain development	24	1.83486	0.00384618	ENSG00000106571, ENSG00000138795, ENSG00000111783, ENSG00000184486, ENSG00000196767, ENSG00000072864, ENSG00000066279, ENSG00000074047, ENSG00000170370, ENSG00000074181, ENSG00000114315, ENSG00000181449, ENSG00000128791, ENSG00000172201, ENSG00000187240, ENSG00000164434, ENSG00000165240, ENSG00000085276, ENSG00000106689, ENSG00000139800, ENSG00000112333, ENSG00000132692, ENSG00000013810, ENSG0000…	1031	102	8117	1.85246	0.999994	0.148864	6.73597
GOTERM_BP_FAT	GO:0021543~pallium development	10	0.764526	0.0152535	ENSG00000106571, ENSG00000138795, ENSG00000184486, ENSG00000072864, ENSG00000170370, ENSG00000112333, ENSG00000181449, ENSG00000132692, ENSG00000013810, ENSG00000172201	1031	32	8117	2.46029	1	0.360118	24.2823
GOTERM_BP_FAT	GO:0021537~telencephalon development	11	0.840979	0.0453905	ENSG00000106571, ENSG00000138795, ENSG00000184486, ENSG00000072864, ENSG00000106689, ENSG00000170370, ENSG00000112333, ENSG00000181449, ENSG00000132692, ENSG00000013810, ENSG00000172201	1031	44	8117	1.96823	1	0.60943	56.8559
GOTERM_BP_FAT	GO:0021761~limbic system development	5	0.382263	0.135439	ENSG00000138795, ENSG00000184486, ENSG00000170370, ENSG00000132692, ENSG00000172201	1031	16	8117	2.46029	1	0.876832	92.8181
GOTERM_BP_FAT	GO:0021987~cerebral cortex development	6	0.458716	0.20364	ENSG00000184486, ENSG00000072864, ENSG00000170370, ENSG00000112333, ENSG00000181449, ENSG00000013810	1031	25	8117	1.88951	1	0.945179	98.3765
GOTERM_BP_FAT	GO:0021766~hippocampus development	4	0.30581	0.258357	ENSG00000138795, ENSG00000170370, ENSG00000132692, ENSG00000172201	1031	14	8117	2.24941	1	0.967758	99.5523
Annotation Cluster 51	Enrichment Score: 1.2676698621309017
Category	Term	Count	%	PValue	Genes	List Total	Pop Hits	Pop Total	Fold Enrichment	Bonferroni	Benjamini	FDR
GOTERM_MF_FAT	GO:0008094~DNA-dependent ATPase activity	18	1.37615	1.42371e-05	ENSG00000182185, ENSG00000196584, ENSG00000116830, ENSG00000131747, ENSG00000013573, ENSG00000196419, ENSG00000131778, ENSG00000145907, ENSG00000049541, ENSG00000136492, ENSG00000133119, ENSG00000138346, ENSG00000163918, ENSG00000035928, ENSG00000140451, ENSG00000197299, ENSG00000111445, ENSG00000165392	943	46	7713	3.20056	0.0145012	0.0145012	0.0225653
GOTERM_MF_FAT	GO:0003678~DNA helicase activity	12	0.917431	0.00219814	ENSG00000136492, ENSG00000138346, ENSG00000013573, ENSG00000076003, ENSG00000196419, ENSG00000131778, ENSG00000140451, ENSG00000197299, ENSG00000145907, ENSG00000104738, ENSG00000166508, ENSG00000165392	943	35	7713	2.8043	0.895417	0.202105	3.42807
GOTERM_MF_FAT	GO:0004003~ATP-dependent DNA helicase activity	9	0.688073	0.0022609	ENSG00000136492, ENSG00000138346, ENSG00000013573, ENSG00000196419, ENSG00000131778, ENSG00000140451, ENSG00000197299, ENSG00000145907, ENSG00000165392	943	21	7713	3.50538	0.901953	0.190322	3.52429
UP_SEQ_FEATURE	short sequence motif:DEAH box	11	0.840979	0.00844326	ENSG00000136492, ENSG00000171316, ENSG00000116830, ENSG00000121988, ENSG00000131778, ENSG00000197299, ENSG00000089876, ENSG00000119969, ENSG00000186871, ENSG00000165392, ENSG00000187790	1304	37	11114	2.53387	1	0.938608	14.2946
GOTERM_MF_FAT	GO:0004386~helicase activity	25	1.91131	0.00947289	ENSG00000171316, ENSG00000051341, ENSG00000137628, ENSG00000121988, ENSG00000131778, ENSG00000196419, ENSG00000123136, ENSG00000145907, ENSG00000089876, ENSG00000136492, ENSG00000204351, ENSG00000138346, ENSG00000197299, ENSG00000104738, ENSG00000166508, ENSG00000165392, ENSG00000116830, ENSG00000013573, ENSG00000155363, ENSG00000085999, ENSG00000186871, ENSG00000187790, ENSG00000076003, ENSG0000…	943	120	7713	1.704	0.999943	0.50219	14.0044
SP_PIR_KEYWORDS	helicase	22	1.68196	0.0255036	ENSG00000116830, ENSG00000171316, ENSG00000051341, ENSG00000013573, ENSG00000137628, ENSG00000121988, ENSG00000155363, ENSG00000196419, ENSG00000131778, ENSG00000085999, ENSG00000145907, ENSG00000123136, ENSG00000089876, ENSG00000186871, ENSG00000187790, ENSG00000136492, ENSG00000204351, ENSG00000138346, ENSG00000197299, ENSG00000140451, ENSG00000119969, ENSG00000165392	1305	115	11119	1.62997	1	0.29168	31.5619
INTERPRO	IPR002464:DNA/RNA helicase, ATP-dependent, DEAH-box type, conserved site	8	0.611621	0.0820653	ENSG00000136492, ENSG00000171316, ENSG00000116830, ENSG00000013573, ENSG00000131778, ENSG00000197299, ENSG00000165392, ENSG00000187790	1160	33	9941	2.07753	1	0.987746	76.2748
INTERPRO	IPR000330:SNF2-related	7	0.535168	0.0863325	ENSG00000171316, ENSG00000116830, ENSG00000121988, ENSG00000131778, ENSG00000085999, ENSG00000119969, ENSG00000186871	1160	27	9941	2.22181	1	0.988899	78.0613
UP_SEQ_FEATURE	domain:Helicase ATP-binding	16	1.22324	0.124207	ENSG00000116830, ENSG00000171316, ENSG00000013573, ENSG00000137628, ENSG00000121988, ENSG00000131778, ENSG00000085999, ENSG00000123136, ENSG00000089876, ENSG00000186871, ENSG00000187790, ENSG00000136492, ENSG00000204351, ENSG00000197299, ENSG00000119969, ENSG00000165392	1304	93	11114	1.46632	1	0.99999	91.0433
GOTERM_MF_FAT	GO:0008026~ATP-dependent helicase activity	15	1.14679	0.159773	ENSG00000116830, ENSG00000051341, ENSG00000013573, ENSG00000137628, ENSG00000196419, ENSG00000131778, ENSG00000145907, ENSG00000123136, ENSG00000187790, ENSG00000136492, ENSG00000204351, ENSG00000138346, ENSG00000197299, ENSG00000140451, ENSG00000165392	943	86	7713	1.42661	1	0.975791	93.6674
GOTERM_MF_FAT	GO:0070035~purine NTP-dependent helicase activity	15	1.14679	0.159773	ENSG00000116830, ENSG00000051341, ENSG00000013573, ENSG00000137628, ENSG00000196419, ENSG00000131778, ENSG00000145907, ENSG00000123136, ENSG00000187790, ENSG00000136492, ENSG00000204351, ENSG00000138346, ENSG00000197299, ENSG00000140451, ENSG00000165392	943	86	7713	1.42661	1	0.975791	93.6674
INTERPRO	IPR014021:Helicase, superfamily 1 and 2, ATP-binding	15	1.14679	0.180287	ENSG00000116830, ENSG00000171316, ENSG00000051341, ENSG00000137628, ENSG00000121988, ENSG00000131778, ENSG00000085999, ENSG00000123136, ENSG00000089876, ENSG00000186871, ENSG00000187790, ENSG00000204351, ENSG00000197299, ENSG00000119969, ENSG00000165392	1160	92	9941	1.39725	1	0.998737	96.4564
INTERPRO	IPR014001:DEAD-like helicase, N-terminal	15	1.14679	0.201977	ENSG00000116830, ENSG00000171316, ENSG00000051341, ENSG00000137628, ENSG00000121988, ENSG00000131778, ENSG00000085999, ENSG00000123136, ENSG00000186871, ENSG00000187790, ENSG00000136492, ENSG00000204351, ENSG00000197299, ENSG00000119969, ENSG00000165392	1160	94	9941	1.36753	1	0.998965	97.7417
SMART	SM00487:DEXDc	15	1.14679	0.243595	ENSG00000116830, ENSG00000171316, ENSG00000051341, ENSG00000137628, ENSG00000121988, ENSG00000131778, ENSG00000085999, ENSG00000123136, ENSG00000186871, ENSG00000187790, ENSG00000136492, ENSG00000204351, ENSG00000197299, ENSG00000119969, ENSG00000165392	673	94	5547	1.31524	1	0.949269	97.5978
GOTERM_MF_FAT	GO:0016887~ATPase activity	36	2.75229	0.260554	ENSG00000182185, ENSG00000196584, ENSG00000051341, ENSG00000095777, ENSG00000137628, ENSG00000196419, ENSG00000131778, ENSG00000123136, ENSG00000145907, ENSG00000049541, ENSG00000136492, ENSG00000166377, ENSG00000187240, ENSG00000204351, ENSG00000138346, ENSG00000156802, ENSG00000144452, ENSG00000035928, ENSG00000157483, ENSG00000197299, ENSG00000111445, ENSG00000102763, ENSG00000165392, ENSG0000…	943	256	7713	1.1502	1	0.990836	99.1644
INTERPRO	IPR001650:DNA/RNA helicase, C-terminal	14	1.07034	0.272233	ENSG00000116830, ENSG00000171316, ENSG00000051341, ENSG00000137628, ENSG00000121988, ENSG00000131778, ENSG00000085999, ENSG00000123136, ENSG00000186871, ENSG00000187790, ENSG00000204351, ENSG00000197299, ENSG00000119969, ENSG00000165392	1160	92	9941	1.3041	1	0.999429	99.5199
SMART	SM00490:HELICc	14	1.07034	0.305626	ENSG00000116830, ENSG00000171316, ENSG00000051341, ENSG00000137628, ENSG00000121988, ENSG00000131778, ENSG00000085999, ENSG00000123136, ENSG00000186871, ENSG00000187790, ENSG00000204351, ENSG00000197299, ENSG00000119969, ENSG00000165392	673	91	5547	1.26803	1	0.955664	99.2339
GOTERM_MF_FAT	GO:0042623~ATPase activity, coupled	29	2.21713	0.309572	ENSG00000182185, ENSG00000196584, ENSG00000051341, ENSG00000095777, ENSG00000137628, ENSG00000196419, ENSG00000131778, ENSG00000123136, ENSG00000145907, ENSG00000049541, ENSG00000136492, ENSG00000166377, ENSG00000204351, ENSG00000138346, ENSG00000035928, ENSG00000157483, ENSG00000111445, ENSG00000197299, ENSG00000165392, ENSG00000116830, ENSG00000131747, ENSG00000013573, ENSG00000135776, ENSG0000…	943	207	7713	1.14588	1	0.994902	99.7183
UP_SEQ_FEATURE	domain:Helicase C-terminal	13	0.993884	0.363504	ENSG00000204351, ENSG00000171316, ENSG00000116830, ENSG00000137628, ENSG00000121988, ENSG00000131778, ENSG00000085999, ENSG00000197299, ENSG00000123136, ENSG00000119969, ENSG00000165392, ENSG00000186871, ENSG00000187790	1304	90	11114	1.2311	1	1	99.973
INTERPRO	IPR011545:DNA/RNA helicase, DEAD/DEAH box type, N-terminal	7	0.535168	0.631732	ENSG00000204351, ENSG00000051341, ENSG00000137628, ENSG00000197299, ENSG00000123136, ENSG00000165392, ENSG00000187790	1160	55	9941	1.09071	1	0.999998	100
Annotation Cluster 52	Enrichment Score: 1.255339852418918
Category	Term	Count	%	PValue	Genes	List Total	Pop Hits	Pop Total	Fold Enrichment	Bonferroni	Benjamini	FDR
GOTERM_BP_FAT	GO:0010553~negative regulation of specific transcription from RNA polymerase II promoter	9	0.688073	0.0295719	ENSG00000186951, ENSG00000162775, ENSG00000116478, ENSG00000068024, ENSG00000114315, ENSG00000197921, ENSG00000135547, ENSG00000164683, ENSG00000048052	1031	30	8117	2.36188	1	0.512676	41.9121
GOTERM_BP_FAT	GO:0032582~negative regulation of gene-specific transcription	9	0.688073	0.049923	ENSG00000186951, ENSG00000162775, ENSG00000116478, ENSG00000068024, ENSG00000114315, ENSG00000197921, ENSG00000135547, ENSG00000164683, ENSG00000048052	1031	33	8117	2.14717	1	0.633618	60.4162
GOTERM_BP_FAT	GO:0010551~regulation of specific transcription from RNA polymerase II promoter	13	0.993884	0.0511287	ENSG00000162775, ENSG00000196419, ENSG00000068024, ENSG00000114315, ENSG00000164683, ENSG00000197921, ENSG00000048052, ENSG00000186951, ENSG00000141510, ENSG00000116478, ENSG00000164104, ENSG00000135547, ENSG00000148400	1031	57	8117	1.79558	1	0.638059	61.3155
GOTERM_BP_FAT	GO:0043193~positive regulation of gene-specific transcription	12	0.917431	0.0657376	ENSG00000162775, ENSG00000140009, ENSG00000109819, ENSG00000141510, ENSG00000196419, ENSG00000116478, ENSG00000068024, ENSG00000164104, ENSG00000114315, ENSG00000197921, ENSG00000134222, ENSG00000148400	1031	53	8117	1.78255	1	0.714856	70.7856
GOTERM_BP_FAT	GO:0032583~regulation of gene-specific transcription	16	1.22324	0.0762387	ENSG00000162775, ENSG00000196419, ENSG00000068024, ENSG00000114315, ENSG00000134222, ENSG00000197921, ENSG00000164683, ENSG00000048052, ENSG00000186951, ENSG00000140009, ENSG00000109819, ENSG00000141510, ENSG00000116478, ENSG00000164104, ENSG00000135547, ENSG00000148400	1031	80	8117	1.57459	1	0.748937	76.19
GOTERM_BP_FAT	GO:0010552~positive regulation of specific transcription from RNA polymerase II promoter	9	0.688073	0.0776475	ENSG00000162775, ENSG00000141510, ENSG00000196419, ENSG00000116478, ENSG00000068024, ENSG00000164104, ENSG00000114315, ENSG00000197921, ENSG00000148400	1031	36	8117	1.96823	1	0.751713	76.8386
Annotation Cluster 53	Enrichment Score: 1.2420828197376508
Category	Term	Count	%	PValue	Genes	List Total	Pop Hits	Pop Total	Fold Enrichment	Bonferroni	Benjamini	FDR
GOTERM_BP_FAT	GO:0045005~maintenance of fidelity during DNA-dependent DNA replication	4	0.30581	0.016707	ENSG00000139618, ENSG00000197299, ENSG00000165392, ENSG00000075131	1031	5	8117	6.29835	1	0.37883	26.2795
GOTERM_BP_FAT	GO:0051052~regulation of DNA metabolic process	18	1.37615	0.018834	ENSG00000012048, ENSG00000160691, ENSG00000138346, ENSG00000182481, ENSG00000139618, ENSG00000020922, ENSG00000141510, ENSG00000149273, ENSG00000117318, ENSG00000074047, ENSG00000093009, ENSG00000140451, ENSG00000197299, ENSG00000162607, ENSG00000112312, ENSG00000167513, ENSG00000123374, ENSG00000075131	1031	79	8117	1.79383	1	0.407384	29.1125
GOTERM_BP_FAT	GO:0006275~regulation of DNA replication	12	0.917431	0.0222729	ENSG00000160691, ENSG00000138346, ENSG00000139618, ENSG00000141510, ENSG00000117318, ENSG00000074047, ENSG00000197299, ENSG00000093009, ENSG00000167513, ENSG00000112312, ENSG00000075131, ENSG00000123374	1031	45	8117	2.09945	1	0.436998	33.4764
GOTERM_BP_FAT	GO:0048478~replication fork protection	3	0.229358	0.0441893	ENSG00000139618, ENSG00000197299, ENSG00000075131	1031	3	8117	7.87294	1	0.601734	55.8628
GOTERM_BP_FAT	GO:0008156~negative regulation of DNA replication	7	0.535168	0.0621088	ENSG00000139618, ENSG00000141510, ENSG00000197299, ENSG00000093009, ENSG00000167513, ENSG00000112312, ENSG00000075131	1031	23	8117	2.39611	1	0.700153	68.6626
GOTERM_BP_FAT	GO:0051053~negative regulation of DNA metabolic process	8	0.611621	0.102211	ENSG00000139618, ENSG00000141510, ENSG00000149273, ENSG00000197299, ENSG00000093009, ENSG00000167513, ENSG00000112312, ENSG00000075131	1031	32	8117	1.96823	1	0.818816	85.7888
GOTERM_BP_FAT	GO:0032297~negative regulation of DNA replication initiation	3	0.229358	0.123862	ENSG00000093009, ENSG00000167513, ENSG00000075131	1031	5	8117	4.72376	1	0.859975	90.8636
GOTERM_BP_FAT	GO:0000076~DNA replication checkpoint	3	0.229358	0.123862	ENSG00000093009, ENSG00000167513, ENSG00000075131	1031	5	8117	4.72376	1	0.859975	90.8636
GOTERM_BP_FAT	GO:0030174~regulation of DNA replication initiation	3	0.229358	0.21968	ENSG00000093009, ENSG00000167513, ENSG00000075131	1031	7	8117	3.37412	1	0.954957	98.8766
Annotation Cluster 54	Enrichment Score: 1.2119389267236294
Category	Term	Count	%	PValue	Genes	List Total	Pop Hits	Pop Total	Fold Enrichment	Bonferroni	Benjamini	FDR
GOTERM_BP_FAT	GO:0007423~sensory organ development	26	1.98777	0.00626608	ENSG00000106571, ENSG00000107736, ENSG00000171316, ENSG00000138696, ENSG00000196767, ENSG00000128791, ENSG00000148516, ENSG00000078246, ENSG00000177707, ENSG00000060718, ENSG00000180228, ENSG00000141736, ENSG00000164199, ENSG00000136826, ENSG00000177426, ENSG00000180447, ENSG00000179981, ENSG00000114315, ENSG00000197921, ENSG00000181449, ENSG00000118733, ENSG00000101144, ENSG00000187098, ENSG0000…	1031	118	8117	1.73472	1	0.204898	10.7519
GOTERM_BP_FAT	GO:0043010~camera-type eye development	15	1.14679	0.0102067	ENSG00000106571, ENSG00000171316, ENSG00000136826, ENSG00000177426, ENSG00000138696, ENSG00000180447, ENSG00000181449, ENSG00000128791, ENSG00000148516, ENSG00000101144, ENSG00000187098, ENSG00000078246, ENSG00000177707, ENSG00000185591, ENSG00000112333	1031	57	8117	2.07183	1	0.284833	16.9438
GOTERM_BP_FAT	GO:0048562~embryonic organ morphogenesis	14	1.07034	0.0112375	ENSG00000106571, ENSG00000107736, ENSG00000171316, ENSG00000180447, ENSG00000179981, ENSG00000142798, ENSG00000074047, ENSG00000181449, ENSG00000148516, ENSG00000101144, ENSG00000078246, ENSG00000185591, ENSG00000060718, ENSG00000180228	1031	52	8117	2.11964	1	0.306137	18.4952
GOTERM_BP_FAT	GO:0001654~eye development	17	1.29969	0.0188723	ENSG00000106571, ENSG00000171316, ENSG00000136826, ENSG00000177426, ENSG00000138696, ENSG00000180447, ENSG00000181449, ENSG00000128791, ENSG00000118733, ENSG00000148516, ENSG00000101144, ENSG00000187098, ENSG00000078246, ENSG00000177707, ENSG00000185591, ENSG00000112333, ENSG00000134138	1031	73	8117	1.83342	1	0.405315	29.1625
GOTERM_BP_FAT	GO:0031076~embryonic camera-type eye development	4	0.30581	0.0480763	ENSG00000101144, ENSG00000078246, ENSG00000185591, ENSG00000148516	1031	7	8117	4.49882	1	0.624026	59.0005
GOTERM_BP_FAT	GO:0048706~embryonic skeletal system development	8	0.611621	0.0559001	ENSG00000106571, ENSG00000078246, ENSG00000120549, ENSG00000180447, ENSG00000142798, ENSG00000185591, ENSG00000060718, ENSG00000148516	1031	28	8117	2.24941	1	0.66279	64.6883
GOTERM_BP_FAT	GO:0048568~embryonic organ development	15	1.14679	0.066212	ENSG00000142731, ENSG00000106571, ENSG00000107736, ENSG00000171316, ENSG00000180447, ENSG00000179981, ENSG00000142798, ENSG00000074047, ENSG00000181449, ENSG00000148516, ENSG00000101144, ENSG00000078246, ENSG00000185591, ENSG00000060718, ENSG00000180228	1031	72	8117	1.6402	1	0.71542	71.0529
GOTERM_BP_FAT	GO:0048704~embryonic skeletal system morphogenesis	6	0.458716	0.0679816	ENSG00000106571, ENSG00000078246, ENSG00000180447, ENSG00000142798, ENSG00000060718, ENSG00000148516	1031	18	8117	2.62431	1	0.716918	72.0297
GOTERM_BP_FAT	GO:0060041~retina development in camera-type eye	6	0.458716	0.0996589	ENSG00000171316, ENSG00000177426, ENSG00000138696, ENSG00000177707, ENSG00000112333, ENSG00000181449	1031	20	8117	2.36188	1	0.812075	85.0398
GOTERM_BP_FAT	GO:0048593~camera-type eye morphogenesis	6	0.458716	0.158343	ENSG00000106571, ENSG00000101144, ENSG00000177707, ENSG00000185591, ENSG00000181449, ENSG00000148516	1031	23	8117	2.05381	1	0.906684	95.582
GOTERM_BP_FAT	GO:0048596~embryonic camera-type eye morphogenesis	3	0.229358	0.17065	ENSG00000101144, ENSG00000185591, ENSG00000148516	1031	6	8117	3.93647	1	0.919476	96.6158
GOTERM_BP_FAT	GO:0048592~eye morphogenesis	8	0.611621	0.200026	ENSG00000106571, ENSG00000101144, ENSG00000180447, ENSG00000177707, ENSG00000185591, ENSG00000181449, ENSG00000118733, ENSG00000148516	1031	38	8117	1.65746	1	0.942591	98.2379
GOTERM_BP_FAT	GO:0048048~embryonic eye morphogenesis	3	0.229358	0.26963	ENSG00000101144, ENSG00000185591, ENSG00000148516	1031	8	8117	2.95235	1	0.970778	99.6607
GOTERM_BP_FAT	GO:0048705~skeletal system morphogenesis	8	0.611621	0.452618	ENSG00000106571, ENSG00000078246, ENSG00000138696, ENSG00000180447, ENSG00000142798, ENSG00000060718, ENSG00000180228, ENSG00000148516	1031	50	8117	1.25967	1	0.995276	99.9982
Annotation Cluster 55	Enrichment Score: 1.200620611158945
Category	Term	Count	%	PValue	Genes	List Total	Pop Hits	Pop Total	Fold Enrichment	Bonferroni	Benjamini	FDR
GOTERM_BP_FAT	GO:0048663~neuron fate commitment	8	0.611621	0.000791648	ENSG00000106571, ENSG00000074047, ENSG00000074181, ENSG00000114315, ENSG00000181449, ENSG00000197921, ENSG00000139445, ENSG00000148400	1031	14	8117	4.49882	0.916623	0.0457935	1.42293
GOTERM_BP_FAT	GO:0045165~cell fate commitment	19	1.4526	0.00158262	ENSG00000106571, ENSG00000136826, ENSG00000164305, ENSG00000180447, ENSG00000074047, ENSG00000110693, ENSG00000074181, ENSG00000114315, ENSG00000181449, ENSG00000197921, ENSG00000139445, ENSG00000103449, ENSG00000187098, ENSG00000141510, ENSG00000138685, ENSG00000128602, ENSG00000112333, ENSG00000164056, ENSG00000148400	1031	68	8117	2.19979	0.993047	0.072518	2.82553
GOTERM_BP_FAT	GO:0001708~cell fate specification	8	0.611621	0.00655092	ENSG00000106571, ENSG00000103449, ENSG00000138685, ENSG00000074047, ENSG00000128602, ENSG00000181449, ENSG00000164056, ENSG00000148400	1031	19	8117	3.31492	1	0.210998	11.2137
GOTERM_BP_FAT	GO:0048754~branching morphogenesis of a tube	8	0.611621	0.102211	ENSG00000086062, ENSG00000106571, ENSG00000101144, ENSG00000111602, ENSG00000121966, ENSG00000074047, ENSG00000142871, ENSG00000148400	1031	32	8117	1.96823	1	0.818816	85.7888
GOTERM_BP_FAT	GO:0001763~morphogenesis of a branching structure	8	0.611621	0.164058	ENSG00000086062, ENSG00000106571, ENSG00000101144, ENSG00000111602, ENSG00000121966, ENSG00000074047, ENSG00000142871, ENSG00000148400	1031	36	8117	1.74954	1	0.912271	96.0945
GOTERM_BP_FAT	GO:0048567~ectodermal gut morphogenesis	3	0.229358	0.17065	ENSG00000106571, ENSG00000074047, ENSG00000148400	1031	6	8117	3.93647	1	0.919476	96.6158
GOTERM_BP_FAT	GO:0007439~ectodermal gut development	3	0.229358	0.17065	ENSG00000106571, ENSG00000074047, ENSG00000148400	1031	6	8117	3.93647	1	0.919476	96.6158
GOTERM_BP_FAT	GO:0048547~gut morphogenesis	3	0.229358	0.31948	ENSG00000106571, ENSG00000074047, ENSG00000148400	1031	9	8117	2.62431	1	0.982608	99.9056
GOTERM_BP_FAT	GO:0048546~digestive tract morphogenesis	3	0.229358	0.31948	ENSG00000106571, ENSG00000074047, ENSG00000148400	1031	9	8117	2.62431	1	0.982608	99.9056
GOTERM_BP_FAT	GO:0055123~digestive system development	3	0.229358	0.31948	ENSG00000106571, ENSG00000074047, ENSG00000148400	1031	9	8117	2.62431	1	0.982608	99.9056
GOTERM_BP_FAT	GO:0048565~gut development	4	0.30581	0.475252	ENSG00000106571, ENSG00000136160, ENSG00000074047, ENSG00000148400	1031	20	8117	1.57459	1	0.995961	99.9991
Annotation Cluster 56	Enrichment Score: 1.1992448583940416
Category	Term	Count	%	PValue	Genes	List Total	Pop Hits	Pop Total	Fold Enrichment	Bonferroni	Benjamini	FDR
SP_PIR_KEYWORDS	dna-binding	178	13.6086	0.000129221	ENSG00000106571, ENSG00000171316, ENSG00000197497, ENSG00000111783, ENSG00000090889, ENSG00000185480, ENSG00000196419, ENSG00000121297, ENSG00000145907, ENSG00000136770, ENSG00000101868, ENSG00000124191, ENSG00000124782, ENSG00000181722, ENSG00000104447, ENSG00000168310, ENSG00000100968, ENSG00000023608, ENSG00000174371, ENSG00000197299, ENSG00000118495, ENSG00000135547, ENSG00000184357, ENSG0000…	1305	1170	11119	1.29625	0.0714932	0.00352603	0.189525
GOTERM_MF_FAT	GO:0003677~DNA binding	224	17.1254	0.00050221	ENSG00000106571, ENSG00000171316, ENSG00000090889, ENSG00000145907, ENSG00000136770, ENSG00000136492, ENSG00000104447, ENSG00000168310, ENSG00000100968, ENSG00000023608, ENSG00000118495, ENSG00000171320, ENSG00000184357, ENSG00000121211, ENSG00000100479, ENSG00000043355, ENSG00000131747, ENSG00000136982, ENSG00000170370, ENSG00000186871, ENSG00000198093, ENSG00000141510, ENSG00000149273, ENSG0000…	943	1509	7713	1.21414	0.402737	0.0823135	0.793111
GOTERM_BP_FAT	GO:0006357~regulation of transcription from RNA polymerase II promoter	74	5.65749	0.0315116	ENSG00000138795, ENSG00000111783, ENSG00000184486, ENSG00000064393, ENSG00000196419, ENSG00000130772, ENSG00000170345, ENSG00000074219, ENSG00000136492, ENSG00000168310, ENSG00000116478, ENSG00000117318, ENSG00000164105, ENSG00000118495, ENSG00000164104, ENSG00000060138, ENSG00000135547, ENSG00000101773, ENSG00000189403, ENSG00000115641, ENSG00000074800, ENSG00000110693, ENSG00000080839, ENSG0000…	1031	467	8117	1.24753	1	0.522195	43.9778
GOTERM_MF_FAT	GO:0030528~transcription regulator activity	136	10.3976	0.0364339	ENSG00000106571, ENSG00000111783, ENSG00000064393, ENSG00000071539, ENSG00000196419, ENSG00000121297, ENSG00000114166, ENSG00000160783, ENSG00000124782, ENSG00000087842, ENSG00000168310, ENSG00000104447, ENSG00000107438, ENSG00000100968, ENSG00000117318, ENSG00000135547, ENSG00000101057, ENSG00000116830, ENSG00000170370, ENSG00000124496, ENSG00000182158, ENSG00000141510, ENSG00000167565, ENSG0000…	943	960	7713	1.15872	1	0.743331	44.4736
GOTERM_MF_FAT	GO:0003700~transcription factor activity	78	5.9633	0.0643589	ENSG00000106571, ENSG00000138795, ENSG00000091656, ENSG00000196767, ENSG00000184486, ENSG00000170345, ENSG00000121297, ENSG00000165891, ENSG00000074219, ENSG00000143995, ENSG00000104447, ENSG00000168310, ENSG00000100968, ENSG00000116478, ENSG00000129173, ENSG00000164104, ENSG00000060138, ENSG00000135547, ENSG00000101057, ENSG00000185650, ENSG00000074800, ENSG00000185513, ENSG00000110693, ENSG0000…	943	534	7713	1.19472	1	0.826239	65.1629
SP_PIR_KEYWORDS	transcription regulation	166	12.6911	0.38839	ENSG00000106571, ENSG00000171316, ENSG00000197497, ENSG00000071243, ENSG00000104973, ENSG00000111783, ENSG00000064393, ENSG00000121297, ENSG00000114166, ENSG00000160783, ENSG00000133884, ENSG00000087077, ENSG00000124191, ENSG00000124782, ENSG00000104447, ENSG00000168310, ENSG00000111602, ENSG00000181722, ENSG00000167670, ENSG00000100968, ENSG00000023608, ENSG00000118495, ENSG00000135547, ENSG0000…	1305	1377	11119	1.02714	1	0.9048	99.9266
GOTERM_BP_FAT	GO:0051252~regulation of RNA metabolic process	146	11.1621	0.405627	ENSG00000111783, ENSG00000064393, ENSG00000196419, ENSG00000121297, ENSG00000114166, ENSG00000136492, ENSG00000124782, ENSG00000168310, ENSG00000104447, ENSG00000100968, ENSG00000117318, ENSG00000118495, ENSG00000135547, ENSG00000138376, ENSG00000128708, ENSG00000170370, ENSG00000134222, ENSG00000124496, ENSG00000182158, ENSG00000198093, ENSG00000159905, ENSG00000115687, ENSG00000101144, ENSG0000…	1031	1121	8117	1.02538	1	0.99267	99.9918
SP_PIR_KEYWORDS	Transcription	171	13.0734	0.407175	ENSG00000106571, ENSG00000171316, ENSG00000197497, ENSG00000071243, ENSG00000104973, ENSG00000111783, ENSG00000064393, ENSG00000121297, ENSG00000114166, ENSG00000160783, ENSG00000133884, ENSG00000087077, ENSG00000124191, ENSG00000124782, ENSG00000104447, ENSG00000168310, ENSG00000111602, ENSG00000181722, ENSG00000167670, ENSG00000100968, ENSG00000023608, ENSG00000118495, ENSG00000135547, ENSG0000…	1305	1424	11119	1.02315	1	0.914565	99.9536
GOTERM_BP_FAT	GO:0045449~regulation of transcription	220	16.8196	0.464264	ENSG00000106571, ENSG00000171316, ENSG00000071243, ENSG00000064393, ENSG00000114166, ENSG00000160783, ENSG00000133884, ENSG00000136492, ENSG00000107438, ENSG00000104447, ENSG00000168310, ENSG00000111602, ENSG00000100968, ENSG00000023608, ENSG00000118495, ENSG00000123374, ENSG00000128708, ENSG00000170370, ENSG00000134222, ENSG00000173193, ENSG00000198093, ENSG00000115687, ENSG00000141510, ENSG0000…	1031	1714	8117	1.01053	1	0.995521	99.9988
GOTERM_BP_FAT	GO:0006355~regulation of transcription, DNA-dependent	140	10.7034	0.493508	ENSG00000111783, ENSG00000064393, ENSG00000196419, ENSG00000121297, ENSG00000114166, ENSG00000136492, ENSG00000124782, ENSG00000168310, ENSG00000104447, ENSG00000100968, ENSG00000117318, ENSG00000118495, ENSG00000135547, ENSG00000128708, ENSG00000170370, ENSG00000134222, ENSG00000124496, ENSG00000182158, ENSG00000198093, ENSG00000159905, ENSG00000115687, ENSG00000101144, ENSG00000141510, ENSG0000…	1031	1093	8117	1.00843	1	0.996519	99.9995
GOTERM_BP_FAT	GO:0006350~transcription	169	12.9205	0.912573	ENSG00000106571, ENSG00000171316, ENSG00000197497, ENSG00000071243, ENSG00000104973, ENSG00000111783, ENSG00000064393, ENSG00000071539, ENSG00000121297, ENSG00000114166, ENSG00000160783, ENSG00000133884, ENSG00000124191, ENSG00000124782, ENSG00000087842, ENSG00000104447, ENSG00000168310, ENSG00000111602, ENSG00000181722, ENSG00000167670, ENSG00000100968, ENSG00000023608, ENSG00000118495, ENSG0000…	1031	1442	8117	0.922695	1	0.999997	100
Annotation Cluster 57	Enrichment Score: 1.1966070151564665
Category	Term	Count	%	PValue	Genes	List Total	Pop Hits	Pop Total	Fold Enrichment	Bonferroni	Benjamini	FDR
INTERPRO	IPR000024:Frizzled cysteine-rich domain	6	0.458716	0.0123	ENSG00000185483, ENSG00000155760, ENSG00000145423, ENSG00000104332, ENSG00000128602, ENSG00000177283	1160	13	9941	3.95531	1	0.742635	18.7737
UP_SEQ_FEATURE	domain:FZ	6	0.458716	0.0177342	ENSG00000185483, ENSG00000155760, ENSG00000145423, ENSG00000104332, ENSG00000128602, ENSG00000177283	1304	14	11114	3.65272	1	0.980274	27.785
INTERPRO	IPR015526:Frizzled related	5	0.382263	0.0422272	ENSG00000155760, ENSG00000145423, ENSG00000104332, ENSG00000128602, ENSG00000177283	1160	12	9941	3.57076	1	0.965941	51.561
SMART	SM00063:FRI	3	0.229358	0.114255	ENSG00000145423, ENSG00000104332, ENSG00000128602	673	5	5547	4.94532	1	0.896407	80.2192
INTERPRO	IPR017981:GPCR, family 2-like	6	0.458716	0.221966	ENSG00000164199, ENSG00000155760, ENSG00000117114, ENSG00000075275, ENSG00000128602, ENSG00000177283	1160	28	9941	1.83639	1	0.99919	98.5253
INTERPRO	IPR000539:Frizzled protein	3	0.229358	0.283066	ENSG00000155760, ENSG00000128602, ENSG00000177283	1160	9	9941	2.85661	1	0.999501	99.6268
Annotation Cluster 58	Enrichment Score: 1.1957463440020348
Category	Term	Count	%	PValue	Genes	List Total	Pop Hits	Pop Total	Fold Enrichment	Bonferroni	Benjamini	FDR
GOTERM_BP_FAT	GO:0050679~positive regulation of epithelial cell proliferation	8	0.611621	0.00655092	ENSG00000086062, ENSG00000114861, ENSG00000118971, ENSG00000101680, ENSG00000180447, ENSG00000107779, ENSG00000138685, ENSG00000141736	1031	19	8117	3.31492	1	0.210998	11.2137
GOTERM_BP_FAT	GO:0010464~regulation of mesenchymal cell proliferation	4	0.30581	0.123599	ENSG00000114861, ENSG00000180447, ENSG00000107779, ENSG00000148516	1031	10	8117	3.14918	1	0.860656	90.8138
GOTERM_BP_FAT	GO:0002053~positive regulation of mesenchymal cell proliferation	3	0.229358	0.31948	ENSG00000114861, ENSG00000180447, ENSG00000107779	1031	9	8117	2.62431	1	0.982608	99.9056
Annotation Cluster 59	Enrichment Score: 1.1605329382819927
Category	Term	Count	%	PValue	Genes	List Total	Pop Hits	Pop Total	Fold Enrichment	Bonferroni	Benjamini	FDR
GOTERM_BP_FAT	GO:0048663~neuron fate commitment	8	0.611621	0.000791648	ENSG00000106571, ENSG00000074047, ENSG00000074181, ENSG00000114315, ENSG00000181449, ENSG00000197921, ENSG00000139445, ENSG00000148400	1031	14	8117	4.49882	0.916623	0.0457935	1.42293
GOTERM_BP_FAT	GO:0021983~pituitary gland development	4	0.30581	0.154647	ENSG00000184486, ENSG00000074047, ENSG00000114315, ENSG00000181449	1031	11	8117	2.86289	1	0.902893	95.2174
GOTERM_BP_FAT	GO:0021536~diencephalon development	4	0.30581	0.294873	ENSG00000184486, ENSG00000074047, ENSG00000114315, ENSG00000181449	1031	15	8117	2.09945	1	0.977753	99.8204
GOTERM_BP_FAT	GO:0035270~endocrine system development	4	0.30581	0.63148	ENSG00000184486, ENSG00000074047, ENSG00000114315, ENSG00000181449	1031	25	8117	1.25967	1	0.99905	100
Annotation Cluster 60	Enrichment Score: 1.1433738230561679
Category	Term	Count	%	PValue	Genes	List Total	Pop Hits	Pop Total	Fold Enrichment	Bonferroni	Benjamini	FDR
SP_PIR_KEYWORDS	extracellular matrix	26	1.98777	0.00359501	ENSG00000179403, ENSG00000163638, ENSG00000187720, ENSG00000187498, ENSG00000113140, ENSG00000112280, ENSG00000160783, ENSG00000172037, ENSG00000197565, ENSG00000188372, ENSG00000178522, ENSG00000196739, ENSG00000106819, ENSG00000138829, ENSG00000101680, ENSG00000117122, ENSG00000060718, ENSG00000188153, ENSG00000182718, ENSG00000142798, ENSG00000053747, ENSG00000108679, ENSG00000049192, ENSG0000…	1305	122	11119	1.8158	0.873467	0.0688032	5.14955
GOTERM_CC_FAT	GO:0044420~extracellular matrix part	16	1.22324	0.0116173	ENSG00000179403, ENSG00000112851, ENSG00000188153, ENSG00000182718, ENSG00000142798, ENSG00000187498, ENSG00000113140, ENSG00000112280, ENSG00000053747, ENSG00000079215, ENSG00000172037, ENSG00000197565, ENSG00000196739, ENSG00000101680, ENSG00000117122, ENSG00000060718	906	65	7303	1.98417	0.997908	0.153591	15.5966
GOTERM_CC_FAT	GO:0005578~proteinaceous extracellular matrix	31	2.37003	0.0125356	ENSG00000179403, ENSG00000112851, ENSG00000049323, ENSG00000163638, ENSG00000187720, ENSG00000187498, ENSG00000113140, ENSG00000112280, ENSG00000079215, ENSG00000172037, ENSG00000197565, ENSG00000188372, ENSG00000178522, ENSG00000106819, ENSG00000196739, ENSG00000138829, ENSG00000131981, ENSG00000101680, ENSG00000117122, ENSG00000060718, ENSG00000076716, ENSG00000183098, ENSG00000188153, ENSG0000…	906	160	7303	1.56176	0.99872	0.156998	16.7274
GOTERM_CC_FAT	GO:0031012~extracellular matrix	32	2.44648	0.0242301	ENSG00000179403, ENSG00000112851, ENSG00000049323, ENSG00000163638, ENSG00000187720, ENSG00000187498, ENSG00000113140, ENSG00000112280, ENSG00000079215, ENSG00000172037, ENSG00000197565, ENSG00000188372, ENSG00000178522, ENSG00000106819, ENSG00000196739, ENSG00000138829, ENSG00000131981, ENSG00000101680, ENSG00000117122, ENSG00000060718, ENSG00000076716, ENSG00000183098, ENSG00000188153, ENSG0000…	906	175	7303	1.47396	0.999998	0.254978	29.9475
GOTERM_CC_FAT	GO:0005604~basement membrane	11	0.840979	0.0452855	ENSG00000197565, ENSG00000179403, ENSG00000112851, ENSG00000188153, ENSG00000182718, ENSG00000101680, ENSG00000142798, ENSG00000187498, ENSG00000113140, ENSG00000053747, ENSG00000172037	906	45	7303	1.97039	1	0.369776	48.9553
SP_PIR_KEYWORDS	Secreted	76	5.8104	0.0535444	ENSG00000001036, ENSG00000179403, ENSG00000066468, ENSG00000141753, ENSG00000049323, ENSG00000163430, ENSG00000137563, ENSG00000163638, ENSG00000187720, ENSG00000187498, ENSG00000127241, ENSG00000160783, ENSG00000172037, ENSG00000197565, ENSG00000187266, ENSG00000170962, ENSG00000078246, ENSG00000163382, ENSG00000138829, ENSG00000128606, ENSG00000115457, ENSG00000117122, ENSG00000142871, ENSG0000…	1305	534	11119	1.21263	1	0.436915	55.418
UP_SEQ_FEATURE	disulfide bond	121	9.25076	0.0794355	ENSG00000197324, ENSG00000185483, ENSG00000138448, ENSG00000049323, ENSG00000182168, ENSG00000187498, ENSG00000127241, ENSG00000160783, ENSG00000172037, ENSG00000187266, ENSG00000038002, ENSG00000136160, ENSG00000131238, ENSG00000109586, ENSG00000170962, ENSG00000144476, ENSG00000117122, ENSG00000163083, ENSG00000121005, ENSG00000101670, ENSG00000113594, ENSG00000143870, ENSG00000166598, ENSG0000…	1304	907	11114	1.13703	1	0.999917	77.8149
GOTERM_CC_FAT	GO:0044421~extracellular region part	54	4.12844	0.115974	ENSG00000179403, ENSG00000049323, ENSG00000141753, ENSG00000163430, ENSG00000137563, ENSG00000163638, ENSG00000187720, ENSG00000187498, ENSG00000127241, ENSG00000160783, ENSG00000079215, ENSG00000172037, ENSG00000197565, ENSG00000138829, ENSG00000117122, ENSG00000115457, ENSG00000140931, ENSG00000101670, ENSG00000204444, ENSG00000104332, ENSG00000188153, ENSG00000142798, ENSG00000053747, ENSG0000…	906	364	7303	1.19582	1	0.616014	83.2827
SP_PIR_KEYWORDS	disulfide bond	124	9.48012	0.128298	ENSG00000197324, ENSG00000185483, ENSG00000138448, ENSG00000049323, ENSG00000182168, ENSG00000187498, ENSG00000127241, ENSG00000160783, ENSG00000172037, ENSG00000187266, ENSG00000038002, ENSG00000136160, ENSG00000131238, ENSG00000109586, ENSG00000144476, ENSG00000170962, ENSG00000117122, ENSG00000163083, ENSG00000121005, ENSG00000101670, ENSG00000113594, ENSG00000143870, ENSG00000166598, ENSG0000…	1305	953	11119	1.10862	1	0.660287	86.6765
SP_PIR_KEYWORDS	signal	165	12.6147	0.228372	ENSG00000107736, ENSG00000198715, ENSG00000197324, ENSG00000185483, ENSG00000181523, ENSG00000138448, ENSG00000049323, ENSG00000182168, ENSG00000187720, ENSG00000187498, ENSG00000127241, ENSG00000160783, ENSG00000136770, ENSG00000172037, ENSG00000187266, ENSG00000038002, ENSG00000136160, ENSG00000131238, ENSG00000174607, ENSG00000170962, ENSG00000122642, ENSG00000117122, ENSG00000163083, ENSG0000…	1305	1328	11119	1.05862	1	0.777569	97.7757
GOTERM_CC_FAT	GO:0005576~extracellular region	91	6.95719	0.236248	ENSG00000001036, ENSG00000179403, ENSG00000066468, ENSG00000125703, ENSG00000141753, ENSG00000049323, ENSG00000163430, ENSG00000137563, ENSG00000163638, ENSG00000187720, ENSG00000187498, ENSG00000127241, ENSG00000079215, ENSG00000160783, ENSG00000172037, ENSG00000197565, ENSG00000187266, ENSG00000131238, ENSG00000170962, ENSG00000163382, ENSG00000138829, ENSG00000115457, ENSG00000117122, ENSG0000…	906	674	7303	1.08831	1	0.831157	97.9976
UP_SEQ_FEATURE	signal peptide	165	12.6147	0.239018	ENSG00000107736, ENSG00000198715, ENSG00000197324, ENSG00000185483, ENSG00000181523, ENSG00000138448, ENSG00000049323, ENSG00000182168, ENSG00000187720, ENSG00000187498, ENSG00000127241, ENSG00000160783, ENSG00000136770, ENSG00000172037, ENSG00000187266, ENSG00000038002, ENSG00000136160, ENSG00000131238, ENSG00000174607, ENSG00000170962, ENSG00000122642, ENSG00000117122, ENSG00000163083, ENSG0000…	1304	1328	11114	1.05896	1	0.999999	99.3051
SP_PIR_KEYWORDS	glycoprotein	218	16.6667	0.378997	ENSG00000107736, ENSG00000198715, ENSG00000197324, ENSG00000168077, ENSG00000038002, ENSG00000000003, ENSG00000136160, ENSG00000131238, ENSG00000174607, ENSG00000171714, ENSG00000057252, ENSG00000117122, ENSG00000163083, ENSG00000183196, ENSG00000102595, ENSG00000148600, ENSG00000113594, ENSG00000166598, ENSG00000040731, ENSG00000179242, ENSG00000117114, ENSG00000101938, ENSG00000142798, ENSG0000…	1305	1818	11119	1.02169	1	0.90148	99.9082
UP_SEQ_FEATURE	glycosylation site:N-linked (GlcNAc...)	202	15.4434	0.553493	ENSG00000107736, ENSG00000198715, ENSG00000197324, ENSG00000168077, ENSG00000038002, ENSG00000000003, ENSG00000136160, ENSG00000131238, ENSG00000174607, ENSG00000171714, ENSG00000163083, ENSG00000183196, ENSG00000102595, ENSG00000148600, ENSG00000113594, ENSG00000166598, ENSG00000040731, ENSG00000179242, ENSG00000117114, ENSG00000101938, ENSG00000142798, ENSG00000166340, ENSG00000086062, ENSG0000…	1304	1725	11114	0.998056	1	1	100
Annotation Cluster 61	Enrichment Score: 1.1263559071528635
Category	Term	Count	%	PValue	Genes	List Total	Pop Hits	Pop Total	Fold Enrichment	Bonferroni	Benjamini	FDR
GOTERM_BP_FAT	GO:0045842~positive regulation of mitotic metaphase/anaphase transition	3	0.229358	0.0441893	ENSG00000138778, ENSG00000135476, ENSG00000126787	1031	3	8117	7.87294	1	0.601734	55.8628
GOTERM_BP_FAT	GO:0030071~regulation of mitotic metaphase/anaphase transition	7	0.535168	0.05119	ENSG00000138778, ENSG00000135476, ENSG00000117724, ENSG00000169679, ENSG00000112742, ENSG00000164109, ENSG00000126787	1031	22	8117	2.50503	1	0.636247	61.3606
GOTERM_BP_FAT	GO:0045787~positive regulation of cell cycle	9	0.688073	0.0675597	ENSG00000089685, ENSG00000138778, ENSG00000135476, ENSG00000137193, ENSG00000118971, ENSG00000139618, ENSG00000110092, ENSG00000137804, ENSG00000126787	1031	35	8117	2.02447	1	0.716662	71.7997
GOTERM_BP_FAT	GO:0051785~positive regulation of nuclear division	4	0.30581	0.123599	ENSG00000138778, ENSG00000135476, ENSG00000137804, ENSG00000126787	1031	10	8117	3.14918	1	0.860656	90.8138
GOTERM_BP_FAT	GO:0045840~positive regulation of mitosis	4	0.30581	0.123599	ENSG00000138778, ENSG00000135476, ENSG00000137804, ENSG00000126787	1031	10	8117	3.14918	1	0.860656	90.8138
Annotation Cluster 62	Enrichment Score: 1.121858053064887
Category	Term	Count	%	PValue	Genes	List Total	Pop Hits	Pop Total	Fold Enrichment	Bonferroni	Benjamini	FDR
BIOCARTA	h_rbPathway:RB Tumor Suppressor/Checkpoint Signaling in response to DNA damage	6	0.458716	0.0274747	ENSG00000170312, ENSG00000149554, ENSG00000141510, ENSG00000166483, ENSG00000135446, ENSG00000123374	145	12	920	3.17241	0.994223	0.576411	29.1585
BIOCARTA	h_g2Pathway:Cell Cycle: G2/M Checkpoint	8	0.611621	0.0431379	ENSG00000170312, ENSG00000012048, ENSG00000149554, ENSG00000141510, ENSG00000166483, ENSG00000134057, ENSG00000166851, ENSG00000183765	145	22	920	2.30721	0.999713	0.639304	42.0527
BIOCARTA	h_cdc25Pathway:cdc25 and chk1 Regulatory Pathway in response to DNA damage	3	0.229358	0.363608	ENSG00000170312, ENSG00000149554, ENSG00000166483	145	8	920	2.37931	1	0.994623	99.6273
Annotation Cluster 63	Enrichment Score: 1.103660265705856
Category	Term	Count	%	PValue	Genes	List Total	Pop Hits	Pop Total	Fold Enrichment	Bonferroni	Benjamini	FDR
GOTERM_BP_FAT	GO:0021513~spinal cord dorsal/ventral patterning	5	0.382263	0.00115932	ENSG00000106571, ENSG00000112210, ENSG00000078246, ENSG00000074047, ENSG00000128602	1031	5	8117	7.87294	0.973718	0.0598126	2.07727
GOTERM_BP_FAT	GO:0021511~spinal cord patterning	5	0.382263	0.00656648	ENSG00000106571, ENSG00000112210, ENSG00000078246, ENSG00000074047, ENSG00000128602	1031	7	8117	5.62353	1	0.209312	11.2388
GOTERM_BP_FAT	GO:0021532~neural tube patterning	5	0.382263	0.0287944	ENSG00000078246, ENSG00000180447, ENSG00000074047, ENSG00000128602, ENSG00000114315	1031	10	8117	3.93647	1	0.5086	41.0642
GOTERM_BP_FAT	GO:0021575~hindbrain morphogenesis	6	0.458716	0.0428652	ENSG00000165240, ENSG00000111783, ENSG00000180447, ENSG00000074047, ENSG00000128602, ENSG00000114315	1031	16	8117	2.95235	1	0.599978	54.7432
GOTERM_BP_FAT	GO:0021904~dorsal/ventral neural tube patterning	4	0.30581	0.0480763	ENSG00000078246, ENSG00000180447, ENSG00000074047, ENSG00000128602	1031	7	8117	4.49882	1	0.624026	59.0005
GOTERM_BP_FAT	GO:0021587~cerebellum morphogenesis	5	0.382263	0.091096	ENSG00000165240, ENSG00000111783, ENSG00000180447, ENSG00000074047, ENSG00000128602	1031	14	8117	2.81176	1	0.789988	82.2446
GOTERM_BP_FAT	GO:0021696~cerebellar cortex morphogenesis	4	0.30581	0.187787	ENSG00000165240, ENSG00000111783, ENSG00000074047, ENSG00000128602	1031	12	8117	2.62431	1	0.933287	97.6807
KEGG_PATHWAY	hsa04340:Hedgehog signaling pathway	7	0.535168	0.201092	ENSG00000106571, ENSG00000101144, ENSG00000043355, ENSG00000112210, ENSG00000180447, ENSG00000074047, ENSG00000128602	394	30	2952	1.74822	1	0.770714	93.4281
GOTERM_BP_FAT	GO:0021695~cerebellar cortex development	4	0.30581	0.222516	ENSG00000165240, ENSG00000111783, ENSG00000074047, ENSG00000128602	1031	13	8117	2.42244	1	0.955877	98.9482
GOTERM_BP_FAT	GO:0021549~cerebellum development	5	0.382263	0.243014	ENSG00000165240, ENSG00000111783, ENSG00000180447, ENSG00000074047, ENSG00000128602	1031	20	8117	1.96823	1	0.964331	99.3515
GOTERM_BP_FAT	GO:0022037~metencephalon development	5	0.382263	0.27247	ENSG00000165240, ENSG00000111783, ENSG00000180447, ENSG00000074047, ENSG00000128602	1031	21	8117	1.87451	1	0.971671	99.6838
GOTERM_BP_FAT	GO:0030902~hindbrain development	6	0.458716	0.383511	ENSG00000165240, ENSG00000111783, ENSG00000180447, ENSG00000074047, ENSG00000128602, ENSG00000114315	1031	32	8117	1.47618	1	0.990752	99.9842
GOTERM_BP_FAT	GO:0021953~central nervous system neuron differentiation	5	0.382263	0.511549	ENSG00000078246, ENSG00000165240, ENSG00000074047, ENSG00000112333, ENSG00000128602	1031	29	8117	1.3574	1	0.997086	99.9998
Annotation Cluster 64	Enrichment Score: 1.0937367817815842
Category	Term	Count	%	PValue	Genes	List Total	Pop Hits	Pop Total	Fold Enrichment	Bonferroni	Benjamini	FDR
UP_SEQ_FEATURE	region of interest:Heparin-binding	5	0.382263	0.0429998	ENSG00000101670, ENSG00000066468, ENSG00000077782, ENSG00000138685, ENSG00000142871	1304	12	11114	3.55125	1	0.999277	55.0485
SP_PIR_KEYWORDS	heparin binding	5	0.382263	0.0430436	ENSG00000105894, ENSG00000066468, ENSG00000077782, ENSG00000101680, ENSG00000138685	1305	12	11119	3.55013	1	0.384712	47.5793
GOTERM_MF_FAT	GO:0030247~polysaccharide binding	15	1.14679	0.0458917	ENSG00000105894, ENSG00000101670, ENSG00000066468, ENSG00000163430, ENSG00000077782, ENSG00000173511, ENSG00000101144, ENSG00000072571, ENSG00000038427, ENSG00000138685, ENSG00000142871, ENSG00000197594, ENSG00000163661, ENSG00000132692, ENSG00000106823	943	71	7713	1.728	1	0.778257	52.5108
GOTERM_MF_FAT	GO:0001871~pattern binding	15	1.14679	0.0458917	ENSG00000105894, ENSG00000101670, ENSG00000066468, ENSG00000163430, ENSG00000077782, ENSG00000173511, ENSG00000101144, ENSG00000072571, ENSG00000038427, ENSG00000138685, ENSG00000142871, ENSG00000197594, ENSG00000163661, ENSG00000132692, ENSG00000106823	943	71	7713	1.728	1	0.778257	52.5108
GOTERM_MF_FAT	GO:0030246~carbohydrate binding	26	1.98777	0.0526428	ENSG00000105894, ENSG00000066468, ENSG00000163430, ENSG00000077782, ENSG00000108479, ENSG00000011028, ENSG00000109586, ENSG00000164574, ENSG00000072571, ENSG00000131981, ENSG00000136856, ENSG00000142871, ENSG00000163661, ENSG00000101670, ENSG00000143891, ENSG00000117114, ENSG00000173511, ENSG00000080200, ENSG00000101144, ENSG00000069493, ENSG00000163754, ENSG00000138685, ENSG00000038427, ENSG0000…	943	147	7713	1.44666	1	0.785887	57.5663
GOTERM_MF_FAT	GO:0005539~glycosaminoglycan binding	13	0.993884	0.101148	ENSG00000105894, ENSG00000101670, ENSG00000066468, ENSG00000163430, ENSG00000077782, ENSG00000173511, ENSG00000101144, ENSG00000072571, ENSG00000038427, ENSG00000138685, ENSG00000142871, ENSG00000132692, ENSG00000106823	943	66	7713	1.61106	1	0.930645	81.5544
SP_PIR_KEYWORDS	heparin-binding	8	0.611621	0.108272	ENSG00000105894, ENSG00000101670, ENSG00000066468, ENSG00000163430, ENSG00000077782, ENSG00000138685, ENSG00000142871, ENSG00000173511	1305	35	11119	1.9475	1	0.614528	81.4036
GOTERM_MF_FAT	GO:0008201~heparin binding	10	0.764526	0.192315	ENSG00000105894, ENSG00000101670, ENSG00000101144, ENSG00000066468, ENSG00000163430, ENSG00000077782, ENSG00000138685, ENSG00000142871, ENSG00000173511, ENSG00000106823	943	53	7713	1.54325	1	0.982718	96.6143
GOTERM_BP_FAT	GO:0008543~fibroblast growth factor receptor signaling pathway	4	0.30581	0.331665	ENSG00000066468, ENSG00000068078, ENSG00000077782, ENSG00000138685	1031	16	8117	1.96823	1	0.984365	99.9319
Annotation Cluster 65	Enrichment Score: 1.0932570849131817
Category	Term	Count	%	PValue	Genes	List Total	Pop Hits	Pop Total	Fold Enrichment	Bonferroni	Benjamini	FDR
GOTERM_BP_FAT	GO:0040001~establishment of mitotic spindle localization	5	0.382263	0.011823	ENSG00000135476, ENSG00000072864, ENSG00000080986, ENSG00000115163, ENSG00000137804	1031	8	8117	4.92059	1	0.316626	19.3642
GOTERM_BP_FAT	GO:0051653~spindle localization	5	0.382263	0.0287944	ENSG00000135476, ENSG00000072864, ENSG00000080986, ENSG00000115163, ENSG00000137804	1031	10	8117	3.93647	1	0.5086	41.0642
GOTERM_BP_FAT	GO:0051293~establishment of spindle localization	5	0.382263	0.0287944	ENSG00000135476, ENSG00000072864, ENSG00000080986, ENSG00000115163, ENSG00000137804	1031	10	8117	3.93647	1	0.5086	41.0642
GOTERM_BP_FAT	GO:0000132~establishment of mitotic spindle orientation	3	0.229358	0.17065	ENSG00000072864, ENSG00000080986, ENSG00000115163	1031	6	8117	3.93647	1	0.919476	96.6158
GOTERM_BP_FAT	GO:0051294~establishment of spindle orientation	3	0.229358	0.17065	ENSG00000072864, ENSG00000080986, ENSG00000115163	1031	6	8117	3.93647	1	0.919476	96.6158
GOTERM_BP_FAT	GO:0007163~establishment or maintenance of cell polarity	7	0.535168	0.234931	ENSG00000092820, ENSG00000112851, ENSG00000072864, ENSG00000148498, ENSG00000101680, ENSG00000080986, ENSG00000115163	1031	33	8117	1.67002	1	0.961459	99.214
GOTERM_BP_FAT	GO:0030010~establishment of cell polarity	4	0.30581	0.331665	ENSG00000072864, ENSG00000101680, ENSG00000080986, ENSG00000115163	1031	16	8117	1.96823	1	0.984365	99.9319
Annotation Cluster 66	Enrichment Score: 1.09223983013336
Category	Term	Count	%	PValue	Genes	List Total	Pop Hits	Pop Total	Fold Enrichment	Bonferroni	Benjamini	FDR
GOTERM_BP_FAT	GO:0032200~telomere organization	8	0.611621	0.0255485	ENSG00000143799, ENSG00000152457, ENSG00000141499, ENSG00000035928, ENSG00000020922, ENSG00000196419, ENSG00000197299, ENSG00000165392	1031	24	8117	2.62431	1	0.472323	37.3961
GOTERM_BP_FAT	GO:0000723~telomere maintenance	7	0.535168	0.0621088	ENSG00000143799, ENSG00000152457, ENSG00000035928, ENSG00000020922, ENSG00000196419, ENSG00000197299, ENSG00000165392	1031	23	8117	2.39611	1	0.700153	68.6626
KEGG_PATHWAY	hsa03450:Non-homologous end-joining	4	0.30581	0.13771	ENSG00000152457, ENSG00000020922, ENSG00000196419, ENSG00000168496	394	10	2952	2.99695	1	0.668622	83.4139
GOTERM_BP_FAT	GO:0060249~anatomical structure homeostasis	12	0.917431	0.195684	ENSG00000143799, ENSG00000152457, ENSG00000138376, ENSG00000035928, ENSG00000020922, ENSG00000196419, ENSG00000197299, ENSG00000112280, ENSG00000166340, ENSG00000164171, ENSG00000165392, ENSG00000132383	1031	65	8117	1.45347	1	0.93917	98.0565
Annotation Cluster 67	Enrichment Score: 1.0799969624113572
Category	Term	Count	%	PValue	Genes	List Total	Pop Hits	Pop Total	Fold Enrichment	Bonferroni	Benjamini	FDR
GOTERM_BP_FAT	GO:0010212~response to ionizing radiation	12	0.917431	0.0133763	ENSG00000012048, ENSG00000132688, ENSG00000196584, ENSG00000152457, ENSG00000144554, ENSG00000181026, ENSG00000139618, ENSG00000141510, ENSG00000196419, ENSG00000085999, ENSG00000110092, ENSG00000197299	1031	42	8117	2.24941	1	0.333822	21.6273
GOTERM_BP_FAT	GO:0009314~response to radiation	24	1.83486	0.0740489	ENSG00000196584, ENSG00000181026, ENSG00000139618, ENSG00000168077, ENSG00000196419, ENSG00000085999, ENSG00000164305, ENSG00000170345, ENSG00000165806, ENSG00000168496, ENSG00000079215, ENSG00000012048, ENSG00000132688, ENSG00000152457, ENSG00000221829, ENSG00000144554, ENSG00000141510, ENSG00000021300, ENSG00000091436, ENSG00000110092, ENSG00000197299, ENSG00000162607, ENSG00000165392, ENSG0000…	1031	133	8117	1.42068	1	0.742272	75.1476
GOTERM_BP_FAT	GO:0009628~response to abiotic stimulus	35	2.67584	0.0868091	ENSG00000196584, ENSG00000181026, ENSG00000139618, ENSG00000168077, ENSG00000196419, ENSG00000170345, ENSG00000165806, ENSG00000079215, ENSG00000132688, ENSG00000152457, ENSG00000144554, ENSG00000221829, ENSG00000111602, ENSG00000021300, ENSG00000091436, ENSG00000137561, ENSG00000064651, ENSG00000110092, ENSG00000197299, ENSG00000115457, ENSG00000060718, ENSG00000060138, ENSG00000165392, ENSG0000…	1031	212	8117	1.29978	1	0.776719	80.6665
GOTERM_BP_FAT	GO:0009411~response to UV	10	0.764526	0.0976161	ENSG00000139618, ENSG00000141510, ENSG00000168077, ENSG00000164305, ENSG00000110092, ENSG00000165806, ENSG00000162607, ENSG00000168496, ENSG00000069869, ENSG00000165392	1031	44	8117	1.7893	1	0.806788	84.4135
GOTERM_BP_FAT	GO:0009416~response to light stimulus	13	0.993884	0.474323	ENSG00000139618, ENSG00000168077, ENSG00000164305, ENSG00000170345, ENSG00000165806, ENSG00000168496, ENSG00000079215, ENSG00000141510, ENSG00000021300, ENSG00000110092, ENSG00000162607, ENSG00000165392, ENSG00000069869	1031	90	8117	1.1372	1	0.995961	99.9991
Annotation Cluster 68	Enrichment Score: 1.0769530829917597
Category	Term	Count	%	PValue	Genes	List Total	Pop Hits	Pop Total	Fold Enrichment	Bonferroni	Benjamini	FDR
GOTERM_BP_FAT	GO:0048634~regulation of muscle development	11	0.840979	0.00959117	ENSG00000076770, ENSG00000138795, ENSG00000117724, ENSG00000116478, ENSG00000143947, ENSG00000138685, ENSG00000068024, ENSG00000144857, ENSG00000135547, ENSG00000048052, ENSG00000148400	1031	35	8117	2.47435	1	0.272571	16.0041
GOTERM_BP_FAT	GO:0016202~regulation of striated muscle tissue development	11	0.840979	0.00959117	ENSG00000076770, ENSG00000138795, ENSG00000117724, ENSG00000116478, ENSG00000143947, ENSG00000138685, ENSG00000068024, ENSG00000144857, ENSG00000135547, ENSG00000048052, ENSG00000148400	1031	35	8117	2.47435	1	0.272571	16.0041
GOTERM_BP_FAT	GO:0051147~regulation of muscle cell differentiation	9	0.688073	0.0158025	ENSG00000076770, ENSG00000116478, ENSG00000143947, ENSG00000068024, ENSG00000144857, ENSG00000106462, ENSG00000048052, ENSG00000148516, ENSG00000148400	1031	27	8117	2.62431	1	0.367721	25.0426
GOTERM_BP_FAT	GO:0051148~negative regulation of muscle cell differentiation	5	0.382263	0.0191694	ENSG00000076770, ENSG00000116478, ENSG00000068024, ENSG00000106462, ENSG00000148400	1031	9	8117	4.37385	1	0.407516	29.5496
GOTERM_BP_FAT	GO:0048742~regulation of skeletal muscle fiber development	7	0.535168	0.0197708	ENSG00000076770, ENSG00000116478, ENSG00000143947, ENSG00000068024, ENSG00000144857, ENSG00000048052, ENSG00000148400	1031	18	8117	3.0617	1	0.411906	30.3274
GOTERM_BP_FAT	GO:0051153~regulation of striated muscle cell differentiation	8	0.611621	0.0202532	ENSG00000076770, ENSG00000116478, ENSG00000143947, ENSG00000068024, ENSG00000144857, ENSG00000106462, ENSG00000048052, ENSG00000148400	1031	23	8117	2.73841	1	0.414265	30.9453
GOTERM_MF_FAT	GO:0042826~histone deacetylase binding	8	0.611621	0.0210721	ENSG00000131747, ENSG00000182481, ENSG00000116478, ENSG00000068024, ENSG00000185591, ENSG00000167182, ENSG00000048052, ENSG00000114166	943	24	7713	2.72641	1	0.629621	28.6513
GOTERM_BP_FAT	GO:0048641~regulation of skeletal muscle tissue development	7	0.535168	0.0331059	ENSG00000076770, ENSG00000116478, ENSG00000143947, ENSG00000068024, ENSG00000144857, ENSG00000048052, ENSG00000148400	1031	20	8117	2.75553	1	0.532236	45.6233
UP_SEQ_FEATURE	region of interest:Histone deacetylase	4	0.30581	0.0572527	ENSG00000163517, ENSG00000116478, ENSG00000068024, ENSG00000048052	1304	8	11114	4.2615	1	0.999783	65.7871
INTERPRO	IPR000286:Histone deacetylase superfamily	4	0.30581	0.0775184	ENSG00000163517, ENSG00000116478, ENSG00000068024, ENSG00000048052	1160	9	9941	3.80881	1	0.98618	74.2212
GOTERM_BP_FAT	GO:0051154~negative regulation of striated muscle cell differentiation	3	0.229358	0.123862	ENSG00000116478, ENSG00000068024, ENSG00000106462	1031	5	8117	4.72376	1	0.859975	90.8636
COG_ONTOLOGY	Chromatin structure and dynamics / Secondary metabolites biosynthesis, transport, and catabolism	3	0.229358	0.136446	ENSG00000116478, ENSG00000068024, ENSG00000048052	157	6	1404	4.47134	0.993179	0.810353	72.4752
GOTERM_MF_FAT	GO:0033558~protein deacetylase activity	4	0.30581	0.205742	ENSG00000163517, ENSG00000116478, ENSG00000068024, ENSG00000048052	943	13	7713	2.51668	1	0.983004	97.4043
GOTERM_MF_FAT	GO:0004407~histone deacetylase activity	4	0.30581	0.205742	ENSG00000163517, ENSG00000116478, ENSG00000068024, ENSG00000048052	943	13	7713	2.51668	1	0.983004	97.4043
GOTERM_BP_FAT	GO:0045661~regulation of myoblast differentiation	3	0.229358	0.21968	ENSG00000076770, ENSG00000144857, ENSG00000148400	1031	7	8117	3.37412	1	0.954957	98.8766
BIOCARTA	h_ranbp2Pathway:Sumoylation by RanBP2 Regulates Transcriptional Repression	4	0.30581	0.240479	ENSG00000132341, ENSG00000116478, ENSG00000068024, ENSG00000048052	145	11	920	2.30721	1	0.966375	96.6748
GOTERM_MF_FAT	GO:0016811~hydrolase activity, acting on carbon-nitrogen (but not peptide) bonds, in linear amides	7	0.535168	0.272125	ENSG00000163517, ENSG00000038002, ENSG00000116478, ENSG00000115866, ENSG00000068024, ENSG00000151092, ENSG00000048052	943	36	7713	1.5904	1	0.99228	99.3493
GOTERM_MF_FAT	GO:0019213~deacetylase activity	4	0.30581	0.274418	ENSG00000163517, ENSG00000116478, ENSG00000068024, ENSG00000048052	943	15	7713	2.18112	1	0.992093	99.381
GOTERM_BP_FAT	GO:0016575~histone deacetylation	4	0.30581	0.294873	ENSG00000163517, ENSG00000116478, ENSG00000068024, ENSG00000048052	1031	15	8117	2.09945	1	0.977753	99.8204
GOTERM_CC_FAT	GO:0000118~histone deacetylase complex	6	0.458716	0.389524	ENSG00000163517, ENSG00000116478, ENSG00000164105, ENSG00000068024, ENSG00000102054, ENSG00000048052	906	33	7303	1.46558	1	0.912428	99.9224
GOTERM_CC_FAT	GO:0016585~chromatin remodeling complex	9	0.688073	0.411146	ENSG00000163517, ENSG00000138160, ENSG00000116478, ENSG00000164105, ENSG00000068024, ENSG00000102054, ENSG00000136518, ENSG00000048052, ENSG00000114166	906	57	7303	1.27274	1	0.919465	99.954
GOTERM_BP_FAT	GO:0006476~protein amino acid deacetylation	4	0.30581	0.440417	ENSG00000163517, ENSG00000116478, ENSG00000068024, ENSG00000048052	1031	19	8117	1.65746	1	0.994745	99.9973
Annotation Cluster 69	Enrichment Score: 1.053033414664939
Category	Term	Count	%	PValue	Genes	List Total	Pop Hits	Pop Total	Fold Enrichment	Bonferroni	Benjamini	FDR
SP_PIR_KEYWORDS	Growth factor binding	6	0.458716	0.0055323	ENSG00000166033, ENSG00000049323, ENSG00000141753, ENSG00000142871, ENSG00000115457, ENSG00000174721	1305	11	11119	4.64744	0.958595	0.0919862	7.82101
INTERPRO	IPR000867:Insulin-like growth factor-binding protein, IGFBP	4	0.30581	0.0775184	ENSG00000166033, ENSG00000141753, ENSG00000142871, ENSG00000115457	1160	9	9941	3.80881	1	0.98618	74.2212
UP_SEQ_FEATURE	domain:IGFBP N-terminal	4	0.30581	0.078592	ENSG00000166033, ENSG00000141753, ENSG00000142871, ENSG00000115457	1304	9	11114	3.788	1	0.999934	77.4422
SMART	SM00121:IB	4	0.30581	0.0850435	ENSG00000166033, ENSG00000141753, ENSG00000142871, ENSG00000115457	673	9	5547	3.6632	1	0.850161	69.489
INTERPRO	IPR017891:Insulin-like growth factor binding protein, N-terminal	3	0.229358	0.192152	ENSG00000141753, ENSG00000142871, ENSG00000115457	1160	7	9941	3.67278	1	0.998975	97.2263
GOTERM_MF_FAT	GO:0005520~insulin-like growth factor binding	4	0.30581	0.205742	ENSG00000166033, ENSG00000141753, ENSG00000142871, ENSG00000115457	943	13	7713	2.51668	1	0.983004	97.4043
GOTERM_MF_FAT	GO:0019838~growth factor binding	9	0.688073	0.375378	ENSG00000113594, ENSG00000166033, ENSG00000049323, ENSG00000141753, ENSG00000142871, ENSG00000115457, ENSG00000187498, ENSG00000174721, ENSG00000141736	943	56	7713	1.31452	1	0.996355	99.9424
Annotation Cluster 70	Enrichment Score: 1.0474991177264676
Category	Term	Count	%	PValue	Genes	List Total	Pop Hits	Pop Total	Fold Enrichment	Bonferroni	Benjamini	FDR
SP_PIR_KEYWORDS	collagen	10	0.764526	0.0204036	ENSG00000197565, ENSG00000152952, ENSG00000196739, ENSG00000188153, ENSG00000168077, ENSG00000133466, ENSG00000122884, ENSG00000187498, ENSG00000060718, ENSG00000112280	1305	36	11119	2.36675	0.999993	0.256079	26.1118
SP_PIR_KEYWORDS	triple helix	6	0.458716	0.051207	ENSG00000197565, ENSG00000188153, ENSG00000152818, ENSG00000187498, ENSG00000060718, ENSG00000112280	1305	18	11119	2.8401	1	0.43407	53.7742
GOTERM_MF_FAT	GO:0005201~extracellular matrix structural constituent	9	0.688073	0.0560836	ENSG00000197565, ENSG00000178522, ENSG00000196739, ENSG00000188153, ENSG00000138829, ENSG00000101680, ENSG00000187498, ENSG00000060718, ENSG00000112280	943	35	7713	2.10323	1	0.789522	59.9445
INTERPRO	IPR008160:Collagen triple helix repeat	8	0.611621	0.06182	ENSG00000197565, ENSG00000196739, ENSG00000188153, ENSG00000168077, ENSG00000133466, ENSG00000187498, ENSG00000060718, ENSG00000112280	1160	31	9941	2.21157	1	0.984988	65.7716
UP_SEQ_FEATURE	region of interest:Triple-helical region	5	0.382263	0.0720245	ENSG00000197565, ENSG00000196739, ENSG00000188153, ENSG00000187498, ENSG00000060718	1304	14	11114	3.04393	1	0.999922	74.3308
INTERPRO	IPR001442:Type 4 procollagen, C-terminal repeat	3	0.229358	0.106874	ENSG00000197565, ENSG00000188153, ENSG00000187498	1160	5	9941	5.1419	1	0.994286	85.0276
UP_SEQ_FEATURE	domain:Collagen IV NC1	3	0.229358	0.107928	ENSG00000197565, ENSG00000188153, ENSG00000187498	1304	5	11114	5.1138	1	0.999984	87.4786
SP_PIR_KEYWORDS	hydroxylation	8	0.611621	0.108272	ENSG00000197565, ENSG00000049323, ENSG00000188153, ENSG00000075275, ENSG00000187498, ENSG00000127241, ENSG00000060718, ENSG00000112280	1305	35	11119	1.9475	1	0.614528	81.4036
GOTERM_CC_FAT	GO:0005581~collagen	6	0.458716	0.109028	ENSG00000197565, ENSG00000196739, ENSG00000188153, ENSG00000187498, ENSG00000060718, ENSG00000112280	906	21	7303	2.30306	1	0.597376	81.2719
SMART	SM00111:C4	3	0.229358	0.114255	ENSG00000197565, ENSG00000188153, ENSG00000187498	673	5	5547	4.94532	1	0.896407	80.2192
PIR_SUPERFAMILY	PIRSF002258:collagen alpha 1(IV) chain	3	0.229358	0.118362	ENSG00000197565, ENSG00000188153, ENSG00000187498	503	5	4060	4.84294	1	0.999946	84.0628
GOTERM_CC_FAT	GO:0030935~sheet-forming collagen	3	0.229358	0.118868	ENSG00000197565, ENSG00000188153, ENSG00000187498	906	5	7303	4.83642	1	0.620299	84.0595
GOTERM_CC_FAT	GO:0005587~collagen type IV	3	0.229358	0.118868	ENSG00000197565, ENSG00000188153, ENSG00000187498	906	5	7303	4.83642	1	0.620299	84.0595
SP_PIR_KEYWORDS	hydroxyproline	5	0.382263	0.129716	ENSG00000197565, ENSG00000188153, ENSG00000187498, ENSG00000060718, ENSG00000112280	1305	17	11119	2.50597	1	0.654693	86.991
SP_PIR_KEYWORDS	hydroxylysine	5	0.382263	0.129716	ENSG00000197565, ENSG00000188153, ENSG00000187498, ENSG00000060718, ENSG00000112280	1305	17	11119	2.50597	1	0.654693	86.991
SP_PIR_KEYWORDS	trimer	5	0.382263	0.152147	ENSG00000197565, ENSG00000188153, ENSG00000187498, ENSG00000060718, ENSG00000132383	1305	18	11119	2.36675	1	0.689509	91.1332
Annotation Cluster 71	Enrichment Score: 1.0405495117840686
Category	Term	Count	%	PValue	Genes	List Total	Pop Hits	Pop Total	Fold Enrichment	Bonferroni	Benjamini	FDR
UP_SEQ_FEATURE	domain:LIM zinc-binding 3	6	0.458716	0.0629564	ENSG00000144791, ENSG00000196923, ENSG00000115641, ENSG00000163110, ENSG00000129474, ENSG00000087077	1304	19	11114	2.69148	1	0.999866	69.3631
SP_PIR_KEYWORDS	LIM domain	10	0.764526	0.0660318	ENSG00000144791, ENSG00000196923, ENSG00000154553, ENSG00000115641, ENSG00000163110, ENSG00000107438, ENSG00000106689, ENSG00000129474, ENSG00000050405, ENSG00000087077	1305	44	11119	1.93643	1	0.474189	63.3154
INTERPRO	IPR001781:Zinc finger, LIM-type	10	0.764526	0.0721199	ENSG00000144791, ENSG00000196923, ENSG00000154553, ENSG00000115641, ENSG00000163110, ENSG00000107438, ENSG00000106689, ENSG00000129474, ENSG00000050405, ENSG00000087077	1160	45	9941	1.90441	1	0.985678	71.566
SMART	SM00132:LIM	10	0.764526	0.0869454	ENSG00000144791, ENSG00000196923, ENSG00000154553, ENSG00000115641, ENSG00000163110, ENSG00000107438, ENSG00000106689, ENSG00000129474, ENSG00000050405, ENSG00000087077	673	45	5547	1.8316	1	0.836857	70.3253
UP_SEQ_FEATURE	domain:LIM zinc-binding 2	7	0.535168	0.148014	ENSG00000144791, ENSG00000196923, ENSG00000115641, ENSG00000163110, ENSG00000106689, ENSG00000129474, ENSG00000087077	1304	31	11114	1.92455	1	0.999995	94.575
UP_SEQ_FEATURE	domain:LIM zinc-binding 1	7	0.535168	0.148014	ENSG00000144791, ENSG00000196923, ENSG00000115641, ENSG00000163110, ENSG00000106689, ENSG00000129474, ENSG00000087077	1304	31	11114	1.92455	1	0.999995	94.575
Annotation Cluster 72	Enrichment Score: 1.0382759533329702
Category	Term	Count	%	PValue	Genes	List Total	Pop Hits	Pop Total	Fold Enrichment	Bonferroni	Benjamini	FDR
INTERPRO	IPR017970:Homeobox, conserved site	12	0.917431	0.0347509	ENSG00000177426, ENSG00000143995, ENSG00000091656, ENSG00000184486, ENSG00000196767, ENSG00000106689, ENSG00000179981, ENSG00000170370, ENSG00000121297, ENSG00000134138, ENSG00000167081, ENSG00000148516	1160	52	9941	1.97765	1	0.953216	44.8011
INTERPRO	IPR001356:Homeobox	12	0.917431	0.0347509	ENSG00000177426, ENSG00000143995, ENSG00000091656, ENSG00000184486, ENSG00000196767, ENSG00000106689, ENSG00000179981, ENSG00000170370, ENSG00000121297, ENSG00000134138, ENSG00000167081, ENSG00000148516	1160	52	9941	1.97765	1	0.953216	44.8011
SMART	SM00389:HOX	12	0.917431	0.0438825	ENSG00000177426, ENSG00000143995, ENSG00000091656, ENSG00000184486, ENSG00000196767, ENSG00000106689, ENSG00000179981, ENSG00000170370, ENSG00000121297, ENSG00000134138, ENSG00000167081, ENSG00000148516	673	52	5547	1.90205	0.999999	0.774814	45.0833
SP_PIR_KEYWORDS	Homeobox	12	0.917431	0.0579886	ENSG00000177426, ENSG00000143995, ENSG00000091656, ENSG00000184486, ENSG00000196767, ENSG00000106689, ENSG00000179981, ENSG00000170370, ENSG00000121297, ENSG00000134138, ENSG00000167081, ENSG00000148516	1305	56	11119	1.82578	1	0.45205	58.3943
UP_SEQ_FEATURE	DNA-binding region:Homeobox; TALE-type	4	0.30581	0.102816	ENSG00000177426, ENSG00000143995, ENSG00000134138, ENSG00000167081	1304	10	11114	3.4092	1	0.999986	86.1069
INTERPRO	IPR012287:Homeodomain-related	10	0.764526	0.261295	ENSG00000177426, ENSG00000143995, ENSG00000091656, ENSG00000184486, ENSG00000196767, ENSG00000106689, ENSG00000170370, ENSG00000134138, ENSG00000101057, ENSG00000167081	1160	60	9941	1.4283	1	0.99941	99.3831
UP_SEQ_FEATURE	DNA-binding region:Homeobox	4	0.30581	0.653598	ENSG00000184486, ENSG00000196767, ENSG00000106689, ENSG00000170370	1304	28	11114	1.21757	1	1	100
Annotation Cluster 73	Enrichment Score: 1.0303264239844063
Category	Term	Count	%	PValue	Genes	List Total	Pop Hits	Pop Total	Fold Enrichment	Bonferroni	Benjamini	FDR
BIOCARTA	h_g2Pathway:Cell Cycle: G2/M Checkpoint	8	0.611621	0.0431379	ENSG00000170312, ENSG00000012048, ENSG00000149554, ENSG00000141510, ENSG00000166483, ENSG00000134057, ENSG00000166851, ENSG00000183765	145	22	920	2.30721	0.999713	0.639304	42.0527
BIOCARTA	h_plk3Pathway:Regulation of cell cycle progression by Plk3	4	0.30581	0.115544	ENSG00000158402, ENSG00000149554, ENSG00000141510, ENSG00000183765	145	8	920	3.17241	1	0.896841	78.1133
BIOCARTA	h_atmPathway:ATM Signaling Pathway	6	0.458716	0.16271	ENSG00000012048, ENSG00000101773, ENSG00000149554, ENSG00000020922, ENSG00000141510, ENSG00000183765	145	19	920	2.00363	1	0.949544	88.8908
Annotation Cluster 74	Enrichment Score: 1.0289931916527997
Category	Term	Count	%	PValue	Genes	List Total	Pop Hits	Pop Total	Fold Enrichment	Bonferroni	Benjamini	FDR
GOTERM_BP_FAT	GO:0006325~chromatin organization	55	4.20489	0.00109251	ENSG00000171316, ENSG00000071243, ENSG00000109685, ENSG00000123485, ENSG00000105011, ENSG00000114166, ENSG00000149929, ENSG00000167670, ENSG00000116478, ENSG00000164104, ENSG00000184357, ENSG00000189403, ENSG00000185513, ENSG00000164032, ENSG00000128708, ENSG00000110693, ENSG00000080839, ENSG00000136518, ENSG00000143258, ENSG00000184260, ENSG00000112983, ENSG00000167468, ENSG00000187837, ENSG0000…	1031	282	8117	1.5355	0.967583	0.0574083	1.95868
GOTERM_BP_FAT	GO:0016569~covalent chromatin modification	19	1.4526	0.153413	ENSG00000163517, ENSG00000071243, ENSG00000128708, ENSG00000068024, ENSG00000136518, ENSG00000114166, ENSG00000048052, ENSG00000143258, ENSG00000152455, ENSG00000100462, ENSG00000077684, ENSG00000127337, ENSG00000116478, ENSG00000120656, ENSG00000112983, ENSG00000119772, ENSG00000106462, ENSG00000119969, ENSG00000168395	1031	110	8117	1.35987	1	0.90192	95.0895
GOTERM_BP_FAT	GO:0016570~histone modification	17	1.29969	0.266147	ENSG00000163517, ENSG00000071243, ENSG00000128708, ENSG00000068024, ENSG00000136518, ENSG00000114166, ENSG00000048052, ENSG00000143258, ENSG00000152455, ENSG00000100462, ENSG00000077684, ENSG00000127337, ENSG00000116478, ENSG00000120656, ENSG00000112983, ENSG00000106462, ENSG00000168395	1031	106	8117	1.26264	1	0.969937	99.6301
SP_PIR_KEYWORDS	chromatin regulator	24	1.83486	0.352651	ENSG00000163517, ENSG00000171316, ENSG00000071243, ENSG00000198157, ENSG00000109685, ENSG00000064961, ENSG00000185513, ENSG00000068024, ENSG00000102054, ENSG00000080839, ENSG00000105011, ENSG00000136518, ENSG00000048052, ENSG00000143258, ENSG00000152455, ENSG00000100462, ENSG00000127337, ENSG00000116478, ENSG00000055609, ENSG00000112983, ENSG00000167657, ENSG00000119772, ENSG00000106462, ENSG0000…	1305	179	11119	1.14239	1	0.890188	99.8311
GOTERM_BP_FAT	GO:0016568~chromatin modification	31	2.37003	0.45528	ENSG00000163517, ENSG00000171316, ENSG00000071243, ENSG00000109685, ENSG00000123485, ENSG00000131778, ENSG00000102054, ENSG00000105011, ENSG00000114166, ENSG00000152455, ENSG00000077684, ENSG00000120656, ENSG00000116478, ENSG00000167657, ENSG00000106462, ENSG00000064961, ENSG00000185513, ENSG00000128708, ENSG00000068024, ENSG00000080839, ENSG00000136518, ENSG00000048052, ENSG00000132780, ENSG0000…	1031	229	8117	1.06577	1	0.995266	99.9983
Annotation Cluster 75	Enrichment Score: 1.0157746621506898
Category	Term	Count	%	PValue	Genes	List Total	Pop Hits	Pop Total	Fold Enrichment	Bonferroni	Benjamini	FDR
GOTERM_BP_FAT	GO:0033043~regulation of organelle organization	33	2.52294	0.00873413	ENSG00000142731, ENSG00000135476, ENSG00000138778, ENSG00000117724, ENSG00000050405, ENSG00000181163, ENSG00000109819, ENSG00000149798, ENSG00000119335, ENSG00000133627, ENSG00000137804, ENSG00000164109, ENSG00000067560, ENSG00000154839, ENSG00000185513, ENSG00000042493, ENSG00000169679, ENSG00000138182, ENSG00000180198, ENSG00000112742, ENSG00000137710, ENSG00000120896, ENSG00000134222, ENSG0000…	1031	165	8117	1.57459	1	0.256143	14.679
GOTERM_BP_FAT	GO:0010639~negative regulation of organelle organization	15	1.14679	0.04385	ENSG00000138778, ENSG00000135476, ENSG00000117724, ENSG00000169679, ENSG00000042493, ENSG00000112742, ENSG00000137710, ENSG00000050405, ENSG00000012048, ENSG00000170989, ENSG00000181163, ENSG00000119335, ENSG00000101871, ENSG00000116489, ENSG00000164109	1031	68	8117	1.73668	1	0.603637	55.5784
GOTERM_BP_FAT	GO:0051129~negative regulation of cellular component organization	18	1.37615	0.183056	ENSG00000138778, ENSG00000135476, ENSG00000189403, ENSG00000117724, ENSG00000042493, ENSG00000169679, ENSG00000112742, ENSG00000137710, ENSG00000050405, ENSG00000012048, ENSG00000170989, ENSG00000181163, ENSG00000040608, ENSG00000119335, ENSG00000101871, ENSG00000116489, ENSG00000164109, ENSG00000067560	1031	106	8117	1.33691	1	0.930396	97.4237
GOTERM_BP_FAT	GO:0051493~regulation of cytoskeleton organization	17	1.29969	0.253605	ENSG00000142731, ENSG00000154839, ENSG00000138778, ENSG00000042493, ENSG00000137710, ENSG00000050405, ENSG00000120896, ENSG00000134222, ENSG00000012048, ENSG00000170989, ENSG00000181163, ENSG00000149798, ENSG00000133627, ENSG00000101871, ENSG00000116489, ENSG00000165480, ENSG00000067560	1031	105	8117	1.27467	1	0.967411	99.4974
GOTERM_BP_FAT	GO:0051494~negative regulation of cytoskeleton organization	7	0.535168	0.469024	ENSG00000012048, ENSG00000170989, ENSG00000042493, ENSG00000101871, ENSG00000116489, ENSG00000137710, ENSG00000050405	1031	43	8117	1.28164	1	0.995791	99.9989
Annotation Cluster 76	Enrichment Score: 1.0028857604874057
Category	Term	Count	%	PValue	Genes	List Total	Pop Hits	Pop Total	Fold Enrichment	Bonferroni	Benjamini	FDR
INTERPRO	IPR012317:Poly(ADP-ribose) polymerase, catalytic region	5	0.382263	0.0708079	ENSG00000143799, ENSG00000105939, ENSG00000138496, ENSG00000173193, ENSG00000102699	1160	14	9941	3.06065	1	0.986628	70.8829
UP_SEQ_FEATURE	domain:PARP catalytic	5	0.382263	0.0720245	ENSG00000143799, ENSG00000105939, ENSG00000138496, ENSG00000173193, ENSG00000102699	1304	14	11114	3.04393	1	0.999922	74.3308
GOTERM_MF_FAT	GO:0016763~transferase activity, transferring pentosyl groups	8	0.611621	0.112856	ENSG00000143799, ENSG00000105939, ENSG00000099810, ENSG00000103489, ENSG00000099256, ENSG00000138496, ENSG00000173193, ENSG00000102699	943	34	7713	1.92452	1	0.94635	85.0159
GOTERM_MF_FAT	GO:0003950~NAD+ ADP-ribosyltransferase activity	5	0.382263	0.169188	ENSG00000143799, ENSG00000105939, ENSG00000138496, ENSG00000173193, ENSG00000102699	943	18	7713	2.272	1	0.977705	94.7033
Annotation Cluster 77	Enrichment Score: 1.0028639533702801
Category	Term	Count	%	PValue	Genes	List Total	Pop Hits	Pop Total	Fold Enrichment	Bonferroni	Benjamini	FDR
GOTERM_BP_FAT	GO:0030330~DNA damage response, signal transduction by p53 class mediator	7	0.535168	0.0415308	ENSG00000012048, ENSG00000075218, ENSG00000181026, ENSG00000139618, ENSG00000141510, ENSG00000064393, ENSG00000185088	1031	21	8117	2.62431	1	0.593059	53.5877
GOTERM_BP_FAT	GO:0042771~DNA damage response, signal transduction by p53 class mediator resulting in induction of apoptosis	5	0.382263	0.0720246	ENSG00000181026, ENSG00000139618, ENSG00000141510, ENSG00000064393, ENSG00000185088	1031	13	8117	3.02805	1	0.734146	74.1458
GOTERM_BP_FAT	GO:0008630~DNA damage response, signal transduction resulting in induction of apoptosis	7	0.535168	0.0877416	ENSG00000012048, ENSG00000181026, ENSG00000139618, ENSG00000141510, ENSG00000064393, ENSG00000185088, ENSG00000183765	1031	25	8117	2.20442	1	0.778704	81.0206
GOTERM_BP_FAT	GO:0006978~DNA damage response, signal transduction by p53 class mediator resulting in transcription of p21 class mediator	3	0.229358	0.123862	ENSG00000012048, ENSG00000139618, ENSG00000064393	1031	5	8117	4.72376	1	0.859975	90.8636
GOTERM_BP_FAT	GO:0042772~DNA damage response, signal transduction resulting in transcription	3	0.229358	0.123862	ENSG00000012048, ENSG00000139618, ENSG00000064393	1031	5	8117	4.72376	1	0.859975	90.8636
GOTERM_BP_FAT	GO:0008629~induction of apoptosis by intracellular signals	8	0.611621	0.238716	ENSG00000012048, ENSG00000181026, ENSG00000139618, ENSG00000141510, ENSG00000064393, ENSG00000164305, ENSG00000185088, ENSG00000183765	1031	40	8117	1.57459	1	0.963247	99.2815
Annotation Cluster 78	Enrichment Score: 0.9969882419914651
Category	Term	Count	%	PValue	Genes	List Total	Pop Hits	Pop Total	Fold Enrichment	Bonferroni	Benjamini	FDR
GOTERM_BP_FAT	GO:0030330~DNA damage response, signal transduction by p53 class mediator	7	0.535168	0.0415308	ENSG00000012048, ENSG00000075218, ENSG00000181026, ENSG00000139618, ENSG00000141510, ENSG00000064393, ENSG00000185088	1031	21	8117	2.62431	1	0.593059	53.5877
GOTERM_BP_FAT	GO:0031571~G1 DNA damage checkpoint	4	0.30581	0.0951577	ENSG00000075218, ENSG00000141510, ENSG00000110092, ENSG00000185088	1031	9	8117	3.49908	1	0.803148	83.6269
GOTERM_BP_FAT	GO:0031575~G1/S transition checkpoint	4	0.30581	0.258357	ENSG00000075218, ENSG00000141510, ENSG00000110092, ENSG00000185088	1031	14	8117	2.24941	1	0.967758	99.5523
Annotation Cluster 79	Enrichment Score: 0.9937982849111573
Category	Term	Count	%	PValue	Genes	List Total	Pop Hits	Pop Total	Fold Enrichment	Bonferroni	Benjamini	FDR
SP_PIR_KEYWORDS	nucleosome core	5	0.382263	0.0430436	ENSG00000181218, ENSG00000184260, ENSG00000197061, ENSG00000164032, ENSG00000115163	1305	12	11119	3.55013	1	0.384712	47.5793
SP_PIR_KEYWORDS	citrullination	3	0.229358	0.0701545	ENSG00000181218, ENSG00000184260, ENSG00000197061	1305	4	11119	6.39023	1	0.484549	65.622
INTERPRO	IPR007125:Histone core	5	0.382263	0.0708079	ENSG00000181218, ENSG00000184260, ENSG00000197061, ENSG00000164032, ENSG00000115163	1160	14	9941	3.06065	1	0.986628	70.8829
KEGG_PATHWAY	hsa05322:Systemic lupus erythematosus	7	0.535168	0.0747395	ENSG00000181218, ENSG00000184260, ENSG00000167088, ENSG00000197061, ENSG00000164032, ENSG00000125835, ENSG00000072110	394	23	2952	2.28029	0.999997	0.624675	61.0126
PIR_SUPERFAMILY	PIRSF002048:histone H2A	3	0.229358	0.0772193	ENSG00000181218, ENSG00000184260, ENSG00000164032	503	4	4060	6.05368	1	0.999846	69.0125
INTERPRO	IPR002119:Histone H2A	3	0.229358	0.148266	ENSG00000181218, ENSG00000184260, ENSG00000164032	1160	6	9941	4.28491	1	0.997167	93.2539
SMART	SM00414:H2A	3	0.229358	0.158032	ENSG00000181218, ENSG00000184260, ENSG00000164032	673	6	5547	4.1211	1	0.913633	89.9486
INTERPRO	IPR009072:Histone-fold	5	0.382263	0.387706	ENSG00000197061, ENSG00000164032, ENSG00000120656, ENSG00000115163, ENSG00000166016	1160	27	9941	1.58701	1	0.999813	99.9737
Annotation Cluster 80	Enrichment Score: 0.9915524378351285
Category	Term	Count	%	PValue	Genes	List Total	Pop Hits	Pop Total	Fold Enrichment	Bonferroni	Benjamini	FDR
GOTERM_MF_FAT	GO:0034061~DNA polymerase activity	9	0.688073	0.0196664	ENSG00000101868, ENSG00000112941, ENSG00000051341, ENSG00000185842, ENSG00000077514, ENSG00000106628, ENSG00000171320, ENSG00000014138, ENSG00000100479	943	29	7713	2.53838	1	0.621076	27.0099
GOTERM_MF_FAT	GO:0003887~DNA-directed DNA polymerase activity	8	0.611621	0.0262713	ENSG00000101868, ENSG00000112941, ENSG00000051341, ENSG00000077514, ENSG00000106628, ENSG00000171320, ENSG00000014138, ENSG00000100479	943	25	7713	2.61735	1	0.695047	34.4269
INTERPRO	IPR007185:DNA polymerase alpha/epsilon, subunit B	3	0.229358	0.0375849	ENSG00000106628, ENSG00000014138, ENSG00000100479	1160	3	9941	8.56983	1	0.957188	47.4617
SP_PIR_KEYWORDS	dna-directed dna polymerase	5	0.382263	0.152147	ENSG00000101868, ENSG00000112941, ENSG00000077514, ENSG00000106628, ENSG00000100479	1305	18	11119	2.36675	1	0.689509	91.1332
GOTERM_MF_FAT	GO:0016779~nucleotidyltransferase activity	13	0.993884	0.527761	ENSG00000051341, ENSG00000144231, ENSG00000106628, ENSG00000014138, ENSG00000168495, ENSG00000101868, ENSG00000112941, ENSG00000185842, ENSG00000077514, ENSG00000171320, ENSG00000117143, ENSG00000100479, ENSG00000198056	943	97	7713	1.09618	1	0.998761	99.9993
SP_PIR_KEYWORDS	nucleotidyltransferase	7	0.535168	0.720715	ENSG00000101868, ENSG00000112941, ENSG00000077514, ENSG00000106628, ENSG00000117143, ENSG00000198056, ENSG00000100479	1305	60	11119	0.994036	1	0.986179	100
Annotation Cluster 81	Enrichment Score: 0.9615355725711219
Category	Term	Count	%	PValue	Genes	List Total	Pop Hits	Pop Total	Fold Enrichment	Bonferroni	Benjamini	FDR
INTERPRO	IPR008160:Collagen triple helix repeat	8	0.611621	0.06182	ENSG00000197565, ENSG00000196739, ENSG00000188153, ENSG00000168077, ENSG00000133466, ENSG00000187498, ENSG00000060718, ENSG00000112280	1160	31	9941	2.21157	1	0.984988	65.7716
GOTERM_CC_FAT	GO:0005581~collagen	6	0.458716	0.109028	ENSG00000197565, ENSG00000196739, ENSG00000188153, ENSG00000187498, ENSG00000060718, ENSG00000112280	906	21	7303	2.30306	1	0.597376	81.2719
INTERPRO	IPR003129:Laminin G, thrombospondin-type, N-terminal	4	0.30581	0.12791	ENSG00000196739, ENSG00000169231, ENSG00000060718, ENSG00000112280	1160	11	9941	3.1163	1	0.995877	89.9681
UP_SEQ_FEATURE	domain:TSP N-terminal	4	0.30581	0.129552	ENSG00000196739, ENSG00000169231, ENSG00000060718, ENSG00000112280	1304	11	11114	3.09927	1	0.999989	91.9873
SMART	SM00210:TSPN	4	0.30581	0.139415	ENSG00000196739, ENSG00000169231, ENSG00000060718, ENSG00000112280	673	11	5547	2.99716	1	0.917424	86.5385
Annotation Cluster 82	Enrichment Score: 0.9589916872390208
Category	Term	Count	%	PValue	Genes	List Total	Pop Hits	Pop Total	Fold Enrichment	Bonferroni	Benjamini	FDR
SP_PIR_KEYWORDS	basement membrane	10	0.764526	0.0010308	ENSG00000197565, ENSG00000179403, ENSG00000188153, ENSG00000182718, ENSG00000101680, ENSG00000142798, ENSG00000187498, ENSG00000113140, ENSG00000053747, ENSG00000172037	1305	24	11119	3.55013	0.446772	0.0234013	1.50256
UP_SEQ_FEATURE	domain:Laminin EGF-like 11	4	0.30581	0.024463	ENSG00000101680, ENSG00000142798, ENSG00000053747, ENSG00000172037	1304	6	11114	5.682	1	0.993868	36.2737
UP_SEQ_FEATURE	domain:Laminin EGF-like 10	4	0.30581	0.024463	ENSG00000101680, ENSG00000142798, ENSG00000053747, ENSG00000172037	1304	6	11114	5.682	1	0.993868	36.2737
UP_SEQ_FEATURE	domain:Laminin EGF-like 8	4	0.30581	0.024463	ENSG00000101680, ENSG00000142798, ENSG00000053747, ENSG00000172037	1304	6	11114	5.682	1	0.993868	36.2737
UP_SEQ_FEATURE	domain:Laminin EGF-like 6	4	0.30581	0.0391265	ENSG00000101680, ENSG00000142798, ENSG00000053747, ENSG00000172037	1304	7	11114	4.87029	1	0.999323	51.621
UP_SEQ_FEATURE	domain:Laminin EGF-like 7	4	0.30581	0.0391265	ENSG00000101680, ENSG00000142798, ENSG00000053747, ENSG00000172037	1304	7	11114	4.87029	1	0.999323	51.621
GOTERM_CC_FAT	GO:0005604~basement membrane	11	0.840979	0.0452855	ENSG00000197565, ENSG00000179403, ENSG00000112851, ENSG00000188153, ENSG00000182718, ENSG00000101680, ENSG00000142798, ENSG00000187498, ENSG00000113140, ENSG00000053747, ENSG00000172037	906	45	7303	1.97039	1	0.369776	48.9553
KEGG_PATHWAY	hsa04512:ECM-receptor interaction	12	0.917431	0.0528637	ENSG00000197565, ENSG00000138448, ENSG00000169231, ENSG00000072571, ENSG00000101680, ENSG00000142798, ENSG00000187498, ENSG00000060718, ENSG00000053747, ENSG00000164171, ENSG00000169439, ENSG00000172037	394	49	2952	1.83487	0.999865	0.555029	48.2414
UP_SEQ_FEATURE	domain:Laminin EGF-like 12	3	0.229358	0.0701137	ENSG00000101680, ENSG00000053747, ENSG00000172037	1304	4	11114	6.39225	1	0.99993	73.352
UP_SEQ_FEATURE	domain:Laminin EGF-like 13	3	0.229358	0.0701137	ENSG00000101680, ENSG00000053747, ENSG00000172037	1304	4	11114	6.39225	1	0.99993	73.352
GOTERM_CC_FAT	GO:0005605~basal lamina	4	0.30581	0.0898737	ENSG00000101680, ENSG00000142798, ENSG00000053747, ENSG00000172037	906	9	7303	3.58254	1	0.545815	74.5002
INTERPRO	IPR012680:Laminin G, subdomain 2	6	0.458716	0.104683	ENSG00000075275, ENSG00000101680, ENSG00000142798, ENSG00000060718, ENSG00000083857, ENSG00000053747	1160	22	9941	2.33723	1	0.994468	84.3984
INTERPRO	IPR018031:Laminin B	3	0.229358	0.106874	ENSG00000101680, ENSG00000142798, ENSG00000053747	1160	5	9941	5.1419	1	0.994286	85.0276
INTERPRO	IPR000034:Laminin B type IV	3	0.229358	0.106874	ENSG00000101680, ENSG00000142798, ENSG00000053747	1160	5	9941	5.1419	1	0.994286	85.0276
UP_SEQ_FEATURE	domain:Laminin EGF-like 9	3	0.229358	0.107928	ENSG00000101680, ENSG00000053747, ENSG00000172037	1304	5	11114	5.1138	1	0.999984	87.4786
SMART	SM00281:LamB	3	0.229358	0.114255	ENSG00000101680, ENSG00000142798, ENSG00000053747	673	5	5547	4.94532	1	0.896407	80.2192
INTERPRO	IPR001791:Laminin G	6	0.458716	0.139683	ENSG00000075275, ENSG00000101680, ENSG00000142798, ENSG00000060718, ENSG00000083857, ENSG00000053747	1160	24	9941	2.14246	1	0.996835	92.0162
SMART	SM00282:LamG	6	0.458716	0.156965	ENSG00000075275, ENSG00000101680, ENSG00000142798, ENSG00000060718, ENSG00000083857, ENSG00000053747	673	24	5547	2.06055	1	0.922126	89.7771
GOTERM_CC_FAT	GO:0043256~laminin complex	3	0.229358	0.1641	ENSG00000101680, ENSG00000053747, ENSG00000172037	906	6	7303	4.03035	1	0.716883	92.58
INTERPRO	IPR013320:Concanavalin A-like lectin/glucanase, subgroup	8	0.611621	0.178418	ENSG00000075275, ENSG00000169231, ENSG00000101680, ENSG00000131981, ENSG00000142798, ENSG00000163661, ENSG00000083857, ENSG00000053747	1160	40	9941	1.71397	1	0.998811	96.3182
UP_SEQ_FEATURE	domain:Laminin EGF-like 4	3	0.229358	0.193875	ENSG00000101680, ENSG00000053747, ENSG00000172037	1304	7	11114	3.65272	1	0.999997	98.0174
INTERPRO	IPR002049:EGF-like, laminin	6	0.458716	0.200111	ENSG00000075275, ENSG00000101680, ENSG00000142798, ENSG00000053747, ENSG00000145794, ENSG00000172037	1160	27	9941	1.90441	1	0.999022	97.6513
UP_SEQ_FEATURE	domain:Laminin EGF-like 3	4	0.30581	0.220863	ENSG00000101680, ENSG00000142798, ENSG00000053747, ENSG00000172037	1304	14	11114	2.43514	1	0.999999	98.9329
SMART	SM00180:EGF_Lam	6	0.458716	0.222652	ENSG00000075275, ENSG00000101680, ENSG00000142798, ENSG00000053747, ENSG00000145794, ENSG00000172037	673	27	5547	1.8316	1	0.944783	96.5403
SP_PIR_KEYWORDS	laminin egf-like domain	5	0.382263	0.226708	ENSG00000075275, ENSG00000101680, ENSG00000142798, ENSG00000053747, ENSG00000172037	1305	21	11119	2.02864	1	0.778174	97.7043
INTERPRO	IPR008211:Laminin, N-terminal	3	0.229358	0.283066	ENSG00000101680, ENSG00000053747, ENSG00000172037	1160	9	9941	2.85661	1	0.999501	99.6268
UP_SEQ_FEATURE	domain:Laminin N-terminal	3	0.229358	0.285365	ENSG00000101680, ENSG00000053747, ENSG00000172037	1304	9	11114	2.841	1	1	99.7785
SMART	SM00136:LamNT	3	0.229358	0.299156	ENSG00000101680, ENSG00000053747, ENSG00000172037	673	9	5547	2.7474	1	0.956109	99.1329
UP_SEQ_FEATURE	domain:Laminin G-like 1	4	0.30581	0.320948	ENSG00000075275, ENSG00000101680, ENSG00000142798, ENSG00000053747	1304	17	11114	2.00541	1	1	99.9125
UP_SEQ_FEATURE	domain:Laminin G-like 2	4	0.30581	0.320948	ENSG00000075275, ENSG00000101680, ENSG00000142798, ENSG00000053747	1304	17	11114	2.00541	1	1	99.9125
UP_SEQ_FEATURE	domain:Laminin EGF-like 2	4	0.30581	0.354734	ENSG00000101680, ENSG00000142798, ENSG00000053747, ENSG00000172037	1304	18	11114	1.894	1	1	99.9654
UP_SEQ_FEATURE	domain:Laminin G-like 3	3	0.229358	0.419243	ENSG00000101680, ENSG00000142798, ENSG00000053747	1304	12	11114	2.13075	1	1	99.9949
UP_SEQ_FEATURE	domain:Laminin EGF-like 1	3	0.229358	0.609128	ENSG00000101680, ENSG00000053747, ENSG00000172037	1304	17	11114	1.50406	1	1	100
Annotation Cluster 83	Enrichment Score: 0.9328399729294584
Category	Term	Count	%	PValue	Genes	List Total	Pop Hits	Pop Total	Fold Enrichment	Bonferroni	Benjamini	FDR
BIOCARTA	h_cellcyclePathway:Cyclins and Cell Cycle Regulation	11	0.840979	0.000296401	ENSG00000170312, ENSG00000105810, ENSG00000118971, ENSG00000164045, ENSG00000110092, ENSG00000134057, ENSG00000080839, ENSG00000133101, ENSG00000123080, ENSG00000135446, ENSG00000123374	145	20	920	3.48966	0.0533655	0.0533655	0.366143
BIOCARTA	h_g1Pathway:Cell Cycle: G1/S Check Point	10	0.764526	0.00505866	ENSG00000170312, ENSG00000105810, ENSG00000164045, ENSG00000141510, ENSG00000116478, ENSG00000145604, ENSG00000110092, ENSG00000133101, ENSG00000135446, ENSG00000123374	145	23	920	2.75862	0.608679	0.268562	6.08254
BBID	26.cyclin-CDK_complexes	6	0.458716	0.0213417	ENSG00000170312, ENSG00000105810, ENSG00000123080, ENSG00000135446, ENSG00000113328, ENSG00000123374	33	12	211	3.19697	0.578067	0.350436	17.9113
BBID	4.cyclins_&_p27_cell_cycle	4	0.30581	0.0257785	ENSG00000170312, ENSG00000105810, ENSG00000135446, ENSG00000123374	33	5	211	5.11515	0.648189	0.294057	21.2539
GOTERM_CC_FAT	GO:0000307~cyclin-dependent protein kinase holoenzyme complex	5	0.382263	0.0265841	ENSG00000105810, ENSG00000118971, ENSG00000110092, ENSG00000135446, ENSG00000123374	906	10	7303	4.03035	0.999999	0.261171	32.3603
BIOCARTA	h_rbPathway:RB Tumor Suppressor/Checkpoint Signaling in response to DNA damage	6	0.458716	0.0274747	ENSG00000170312, ENSG00000149554, ENSG00000141510, ENSG00000166483, ENSG00000135446, ENSG00000123374	145	12	920	3.17241	0.994223	0.576411	29.1585
BBID	94.E2F_transcriptional_activity_cell_cycle	4	0.30581	0.0462114	ENSG00000105810, ENSG00000141510, ENSG00000135446, ENSG00000123374	33	6	211	4.26263	0.84931	0.376952	35.1355
GOTERM_BP_FAT	GO:0048145~regulation of fibroblast proliferation	6	0.458716	0.0996589	ENSG00000105810, ENSG00000177426, ENSG00000141510, ENSG00000197956, ENSG00000135446, ENSG00000145386	1031	20	8117	2.36188	1	0.812075	85.0398
KEGG_PATHWAY	hsa05219:Bladder cancer	8	0.611621	0.15694	ENSG00000068078, ENSG00000141510, ENSG00000007968, ENSG00000110092, ENSG00000167657, ENSG00000173511, ENSG00000135446, ENSG00000141736	394	34	2952	1.76291	1	0.703969	87.3825
KEGG_PATHWAY	hsa05218:Melanoma	9	0.688073	0.28293	ENSG00000105810, ENSG00000187098, ENSG00000170962, ENSG00000141510, ENSG00000007968, ENSG00000077782, ENSG00000138685, ENSG00000110092, ENSG00000135446	394	47	2952	1.43471	1	0.847534	98.2276
BIOCARTA	h_RacCycDPathway:Influence of Ras and Rho proteins on G1 to S Transition	5	0.382263	0.496916	ENSG00000105810, ENSG00000110092, ENSG00000135446, ENSG00000067560, ENSG00000123374	145	23	920	1.37931	1	0.998262	99.9797
BIOCARTA	h_p53Pathway:p53 Signaling Pathway	4	0.30581	0.511947	ENSG00000141510, ENSG00000110092, ENSG00000135446, ENSG00000123374	145	17	920	1.4929	1	0.998199	99.986
KEGG_PATHWAY	hsa05212:Pancreatic cancer	9	0.688073	0.515888	ENSG00000105810, ENSG00000139618, ENSG00000141510, ENSG00000007968, ENSG00000110092, ENSG00000173511, ENSG00000135446, ENSG00000141736, ENSG00000129675	394	58	2952	1.16261	1	0.937137	99.9849
SP_PIR_KEYWORDS	serine/threonine-specific protein kinase	7	0.535168	0.541395	ENSG00000170312, ENSG00000141639, ENSG00000105810, ENSG00000114738, ENSG00000137193, ENSG00000166851, ENSG00000123374	1305	50	11119	1.19284	1	0.960935	99.9989
GOTERM_MF_FAT	GO:0004693~cyclin-dependent protein kinase activity	4	0.30581	0.604145	ENSG00000170312, ENSG00000105810, ENSG00000135446, ENSG00000123374	943	25	7713	1.30867	1	0.999503	100
KEGG_PATHWAY	hsa05223:Non-small cell lung cancer	6	0.458716	0.734809	ENSG00000105810, ENSG00000141510, ENSG00000007968, ENSG00000110092, ENSG00000135446, ENSG00000141736	394	45	2952	0.998985	1	0.980895	100
PIR_SUPERFAMILY	PIRSF000564:kinase-related transforming protein	4	0.30581	0.775721	ENSG00000170312, ENSG00000105810, ENSG00000135446, ENSG00000123374	503	32	4060	1.00895	1	1	100
KEGG_PATHWAY	hsa05220:Chronic myeloid leukemia	8	0.611621	0.78197	ENSG00000160691, ENSG00000105810, ENSG00000085276, ENSG00000141510, ENSG00000007968, ENSG00000116478, ENSG00000110092, ENSG00000135446	394	65	2952	0.92214	1	0.984442	100
KEGG_PATHWAY	hsa05214:Glioma	6	0.458716	0.800969	ENSG00000160691, ENSG00000105810, ENSG00000141510, ENSG00000007968, ENSG00000110092, ENSG00000135446	394	49	2952	0.917435	1	0.985039	100
Annotation Cluster 84	Enrichment Score: 0.9248540687526073
Category	Term	Count	%	PValue	Genes	List Total	Pop Hits	Pop Total	Fold Enrichment	Bonferroni	Benjamini	FDR
INTERPRO	IPR003650:Orange	4	0.30581	0.0240909	ENSG00000114315, ENSG00000197921, ENSG00000135547, ENSG00000164683	1160	6	9941	5.71322	1	0.892321	33.6152
UP_SEQ_FEATURE	domain:Orange	4	0.30581	0.024463	ENSG00000114315, ENSG00000197921, ENSG00000135547, ENSG00000164683	1304	6	11114	5.682	1	0.993868	36.2737
GOTERM_BP_FAT	GO:0010553~negative regulation of specific transcription from RNA polymerase II promoter	9	0.688073	0.0295719	ENSG00000186951, ENSG00000162775, ENSG00000116478, ENSG00000068024, ENSG00000114315, ENSG00000197921, ENSG00000135547, ENSG00000164683, ENSG00000048052	1031	30	8117	2.36188	1	0.512676	41.9121
GOTERM_BP_FAT	GO:0032582~negative regulation of gene-specific transcription	9	0.688073	0.049923	ENSG00000186951, ENSG00000162775, ENSG00000116478, ENSG00000068024, ENSG00000114315, ENSG00000197921, ENSG00000135547, ENSG00000164683, ENSG00000048052	1031	33	8117	2.14717	1	0.633618	60.4162
INTERPRO	IPR018352:Orange subgroup	3	0.229358	0.106874	ENSG00000114315, ENSG00000135547, ENSG00000164683	1160	5	9941	5.1419	1	0.994286	85.0276
SMART	SM00511:ORANGE	3	0.229358	0.114255	ENSG00000114315, ENSG00000135547, ENSG00000164683	673	5	5547	4.94532	1	0.896407	80.2192
INTERPRO	IPR001092:Basic helix-loop-helix dimerisation region bHLH	10	0.764526	0.245414	ENSG00000151322, ENSG00000187098, ENSG00000117318, ENSG00000213347, ENSG00000114315, ENSG00000197921, ENSG00000135547, ENSG00000164683, ENSG00000116990, ENSG00000172201	1160	59	9941	1.45251	1	0.999359	99.1181
UP_SEQ_FEATURE	domain:Helix-loop-helix motif	10	0.764526	0.250611	ENSG00000151322, ENSG00000187098, ENSG00000117318, ENSG00000213347, ENSG00000114315, ENSG00000197921, ENSG00000135547, ENSG00000164683, ENSG00000116990, ENSG00000172201	1304	59	11114	1.44458	1	0.999999	99.4744
SMART	SM00353:HLH	10	0.764526	0.281874	ENSG00000151322, ENSG00000187098, ENSG00000117318, ENSG00000213347, ENSG00000114315, ENSG00000197921, ENSG00000135547, ENSG00000164683, ENSG00000116990, ENSG00000172201	673	59	5547	1.39698	1	0.958976	98.7994
INTERPRO	IPR011598:Helix-loop-helix DNA-binding	6	0.458716	0.573259	ENSG00000213347, ENSG00000114315, ENSG00000197921, ENSG00000135547, ENSG00000164683, ENSG00000116990	1160	43	9941	1.19579	1	0.999991	99.9999
UP_SEQ_FEATURE	DNA-binding region:Basic motif	11	0.840979	0.635342	ENSG00000151322, ENSG00000146592, ENSG00000187098, ENSG00000170345, ENSG00000213347, ENSG00000114315, ENSG00000197921, ENSG00000135547, ENSG00000164683, ENSG00000182158, ENSG00000116990	1304	91	11114	1.03025	1	1	100
Annotation Cluster 85	Enrichment Score: 0.9193172368484017
Category	Term	Count	%	PValue	Genes	List Total	Pop Hits	Pop Total	Fold Enrichment	Bonferroni	Benjamini	FDR
SP_PIR_KEYWORDS	proteoglycan	8	0.611621	0.0634883	ENSG00000183098, ENSG00000121966, ENSG00000072571, ENSG00000038427, ENSG00000142798, ENSG00000132692, ENSG00000076716, ENSG00000169439	1305	31	11119	2.19879	1	0.471728	61.8211
SP_PIR_KEYWORDS	hyaluronic acid	3	0.229358	0.107988	ENSG00000072571, ENSG00000038427, ENSG00000132692	1305	5	11119	5.11218	1	0.618874	81.3167
GOTERM_MF_FAT	GO:0005540~hyaluronic acid binding	3	0.229358	0.25467	ENSG00000072571, ENSG00000038427, ENSG00000132692	943	8	7713	3.06721	1	0.990338	99.0526
Annotation Cluster 86	Enrichment Score: 0.9172479444920881
Category	Term	Count	%	PValue	Genes	List Total	Pop Hits	Pop Total	Fold Enrichment	Bonferroni	Benjamini	FDR
GOTERM_BP_FAT	GO:0050974~detection of mechanical stimulus involved in sensory perception	5	0.382263	0.0287944	ENSG00000164199, ENSG00000064651, ENSG00000181449, ENSG00000060718, ENSG00000164171	1031	10	8117	3.93647	1	0.5086	41.0642
GOTERM_BP_FAT	GO:0050982~detection of mechanical stimulus	5	0.382263	0.0552278	ENSG00000164199, ENSG00000064651, ENSG00000181449, ENSG00000060718, ENSG00000164171	1031	12	8117	3.28039	1	0.66044	64.2305
GOTERM_BP_FAT	GO:0050910~detection of mechanical stimulus involved in sensory perception of sound	4	0.30581	0.0698283	ENSG00000164199, ENSG00000064651, ENSG00000181449, ENSG00000060718	1031	8	8117	3.93647	1	0.724784	73.0158
GOTERM_BP_FAT	GO:0050954~sensory perception of mechanical stimulus	12	0.917431	0.0818883	ENSG00000107736, ENSG00000164199, ENSG00000171316, ENSG00000095777, ENSG00000196767, ENSG00000064651, ENSG00000164305, ENSG00000181449, ENSG00000060718, ENSG00000164171, ENSG00000071127, ENSG00000079215	1031	55	8117	1.71773	1	0.763293	78.6918
GOTERM_BP_FAT	GO:0007605~sensory perception of sound	11	0.840979	0.104725	ENSG00000107736, ENSG00000164199, ENSG00000171316, ENSG00000095777, ENSG00000196767, ENSG00000064651, ENSG00000164305, ENSG00000181449, ENSG00000060718, ENSG00000071127, ENSG00000079215	1031	51	8117	1.69808	1	0.825155	86.4919
GOTERM_BP_FAT	GO:0009612~response to mechanical stimulus	8	0.611621	0.131317	ENSG00000164199, ENSG00000064651, ENSG00000170345, ENSG00000115457, ENSG00000181449, ENSG00000060718, ENSG00000164171, ENSG00000079215	1031	34	8117	1.85246	1	0.871783	92.1726
GOTERM_BP_FAT	GO:0050906~detection of stimulus involved in sensory perception	5	0.382263	0.135439	ENSG00000164199, ENSG00000064651, ENSG00000181449, ENSG00000060718, ENSG00000164171	1031	16	8117	2.46029	1	0.876832	92.8181
GOTERM_BP_FAT	GO:0009582~detection of abiotic stimulus	7	0.535168	0.192519	ENSG00000164199, ENSG00000111602, ENSG00000021300, ENSG00000064651, ENSG00000181449, ENSG00000060718, ENSG00000164171	1031	31	8117	1.77776	1	0.936741	97.9134
GOTERM_BP_FAT	GO:0009581~detection of external stimulus	6	0.458716	0.356925	ENSG00000164199, ENSG00000021300, ENSG00000064651, ENSG00000181449, ENSG00000060718, ENSG00000164171	1031	31	8117	1.52379	1	0.988024	99.9661
GOTERM_BP_FAT	GO:0051606~detection of stimulus	8	0.611621	0.577614	ENSG00000164199, ENSG00000143799, ENSG00000111602, ENSG00000021300, ENSG00000064651, ENSG00000181449, ENSG00000060718, ENSG00000164171	1031	56	8117	1.12471	1	0.998349	100
Annotation Cluster 87	Enrichment Score: 0.9030760685130191
Category	Term	Count	%	PValue	Genes	List Total	Pop Hits	Pop Total	Fold Enrichment	Bonferroni	Benjamini	FDR
INTERPRO	IPR000253:Forkhead-associated	7	0.535168	0.113824	ENSG00000137337, ENSG00000137177, ENSG00000118193, ENSG00000145365, ENSG00000197892, ENSG00000148773, ENSG00000183765	1160	29	9941	2.06858	1	0.995357	86.8691
SMART	SM00240:FHA	7	0.535168	0.130364	ENSG00000137337, ENSG00000137177, ENSG00000118193, ENSG00000145365, ENSG00000197892, ENSG00000148773, ENSG00000183765	673	29	5547	1.9895	1	0.914286	84.5198
UP_SEQ_FEATURE	domain:FHA	7	0.535168	0.131637	ENSG00000137337, ENSG00000137177, ENSG00000118193, ENSG00000145365, ENSG00000197892, ENSG00000148773, ENSG00000183765	1304	30	11114	1.9887	1	0.999988	92.3294
Annotation Cluster 88	Enrichment Score: 0.8950514607882615
Category	Term	Count	%	PValue	Genes	List Total	Pop Hits	Pop Total	Fold Enrichment	Bonferroni	Benjamini	FDR
GOTERM_BP_FAT	GO:0043067~regulation of programmed cell death	82	6.26911	0.0409206	ENSG00000106571, ENSG00000071243, ENSG00000064393, ENSG00000105483, ENSG00000129675, ENSG00000133884, ENSG00000170430, ENSG00000136160, ENSG00000131238, ENSG00000116478, ENSG00000117318, ENSG00000188229, ENSG00000118495, ENSG00000128602, ENSG00000060138, ENSG00000163545, ENSG00000180228, ENSG00000127863, ENSG00000131747, ENSG00000138376, ENSG00000189403, ENSG00000166598, ENSG00000173530, ENSG0000…	1031	531	8117	1.21578	1	0.592506	53.0501
GOTERM_BP_FAT	GO:0043066~negative regulation of apoptosis	39	2.98165	0.0430895	ENSG00000196584, ENSG00000064393, ENSG00000170312, ENSG00000089685, ENSG00000136160, ENSG00000131238, ENSG00000181163, ENSG00000124767, ENSG00000116478, ENSG00000145604, ENSG00000128602, ENSG00000060138, ENSG00000141736, ENSG00000163545, ENSG00000067560, ENSG00000138376, ENSG00000173530, ENSG00000189403, ENSG00000166598, ENSG00000104332, ENSG00000139644, ENSG00000162734, ENSG00000164305, ENSG0000…	1031	227	8117	1.35262	1	0.599498	54.9347
GOTERM_BP_FAT	GO:0010941~regulation of cell death	82	6.26911	0.0441733	ENSG00000106571, ENSG00000071243, ENSG00000064393, ENSG00000105483, ENSG00000129675, ENSG00000133884, ENSG00000170430, ENSG00000136160, ENSG00000131238, ENSG00000116478, ENSG00000117318, ENSG00000188229, ENSG00000118495, ENSG00000128602, ENSG00000060138, ENSG00000163545, ENSG00000180228, ENSG00000127863, ENSG00000131747, ENSG00000138376, ENSG00000189403, ENSG00000166598, ENSG00000173530, ENSG0000…	1031	533	8117	1.21122	1	0.603988	55.8495
GOTERM_BP_FAT	GO:0042981~regulation of apoptosis	81	6.19266	0.0467465	ENSG00000106571, ENSG00000071243, ENSG00000064393, ENSG00000105483, ENSG00000129675, ENSG00000133884, ENSG00000170430, ENSG00000136160, ENSG00000131238, ENSG00000116478, ENSG00000117318, ENSG00000188229, ENSG00000118495, ENSG00000128602, ENSG00000060138, ENSG00000163545, ENSG00000180228, ENSG00000127863, ENSG00000131747, ENSG00000138376, ENSG00000189403, ENSG00000166598, ENSG00000173530, ENSG0000…	1031	527	8117	1.21007	1	0.618142	57.9516
GOTERM_BP_FAT	GO:0043069~negative regulation of programmed cell death	39	2.98165	0.0483008	ENSG00000196584, ENSG00000064393, ENSG00000170312, ENSG00000089685, ENSG00000136160, ENSG00000131238, ENSG00000181163, ENSG00000124767, ENSG00000116478, ENSG00000145604, ENSG00000128602, ENSG00000060138, ENSG00000141736, ENSG00000163545, ENSG00000067560, ENSG00000138376, ENSG00000173530, ENSG00000189403, ENSG00000166598, ENSG00000104332, ENSG00000139644, ENSG00000162734, ENSG00000164305, ENSG0000…	1031	229	8117	1.34081	1	0.623462	59.1751
GOTERM_BP_FAT	GO:0060548~negative regulation of cell death	39	2.98165	0.0510757	ENSG00000196584, ENSG00000064393, ENSG00000170312, ENSG00000089685, ENSG00000136160, ENSG00000131238, ENSG00000181163, ENSG00000124767, ENSG00000116478, ENSG00000145604, ENSG00000128602, ENSG00000060138, ENSG00000141736, ENSG00000163545, ENSG00000067560, ENSG00000138376, ENSG00000173530, ENSG00000189403, ENSG00000166598, ENSG00000104332, ENSG00000139644, ENSG00000162734, ENSG00000164305, ENSG0000…	1031	230	8117	1.33498	1	0.639945	61.2763
GOTERM_BP_FAT	GO:0043065~positive regulation of apoptosis	41	3.13456	0.253197	ENSG00000071243, ENSG00000181026, ENSG00000139618, ENSG00000114346, ENSG00000064393, ENSG00000185088, ENSG00000129675, ENSG00000133884, ENSG00000184990, ENSG00000167004, ENSG00000117318, ENSG00000091436, ENSG00000188229, ENSG00000183763, ENSG00000145604, ENSG00000118495, ENSG00000167657, ENSG00000180228, ENSG00000183765, ENSG00000127863, ENSG00000131747, ENSG00000138376, ENSG00000154447, ENSG0000…	1031	283	8117	1.1406	1	0.967619	99.4924
GOTERM_BP_FAT	GO:0043068~positive regulation of programmed cell death	41	3.13456	0.268468	ENSG00000071243, ENSG00000181026, ENSG00000139618, ENSG00000114346, ENSG00000064393, ENSG00000185088, ENSG00000129675, ENSG00000133884, ENSG00000184990, ENSG00000167004, ENSG00000117318, ENSG00000091436, ENSG00000188229, ENSG00000183763, ENSG00000145604, ENSG00000118495, ENSG00000167657, ENSG00000180228, ENSG00000183765, ENSG00000127863, ENSG00000131747, ENSG00000138376, ENSG00000154447, ENSG0000…	1031	285	8117	1.1326	1	0.970624	99.6508
GOTERM_BP_FAT	GO:0010942~positive regulation of cell death	41	3.13456	0.276244	ENSG00000071243, ENSG00000181026, ENSG00000139618, ENSG00000114346, ENSG00000064393, ENSG00000185088, ENSG00000129675, ENSG00000133884, ENSG00000184990, ENSG00000167004, ENSG00000117318, ENSG00000091436, ENSG00000188229, ENSG00000183763, ENSG00000145604, ENSG00000118495, ENSG00000167657, ENSG00000180228, ENSG00000183765, ENSG00000127863, ENSG00000131747, ENSG00000138376, ENSG00000154447, ENSG0000…	1031	286	8117	1.12864	1	0.972228	99.7122
GOTERM_BP_FAT	GO:0006916~anti-apoptosis	20	1.52905	0.401003	ENSG00000173530, ENSG00000166598, ENSG00000189403, ENSG00000104332, ENSG00000162734, ENSG00000113734, ENSG00000135116, ENSG00000106211, ENSG00000164111, ENSG00000139921, ENSG00000170312, ENSG00000089685, ENSG00000181163, ENSG00000140009, ENSG00000124767, ENSG00000143947, ENSG00000116478, ENSG00000145604, ENSG00000084207, ENSG00000119969	1031	139	8117	1.1328	1	0.992341	99.9906
GOTERM_BP_FAT	GO:0006917~induction of apoptosis	28	2.14067	0.513063	ENSG00000181026, ENSG00000139618, ENSG00000114346, ENSG00000064393, ENSG00000185088, ENSG00000129675, ENSG00000133884, ENSG00000184990, ENSG00000183763, ENSG00000188229, ENSG00000118495, ENSG00000167657, ENSG00000180228, ENSG00000183765, ENSG00000127863, ENSG00000154447, ENSG00000164305, ENSG00000113734, ENSG00000135116, ENSG00000081320, ENSG00000123080, ENSG00000012048, ENSG00000143514, ENSG0000…	1031	211	8117	1.04475	1	0.997115	99.9998
GOTERM_BP_FAT	GO:0012502~induction of programmed cell death	28	2.14067	0.523635	ENSG00000181026, ENSG00000139618, ENSG00000114346, ENSG00000064393, ENSG00000185088, ENSG00000129675, ENSG00000133884, ENSG00000184990, ENSG00000183763, ENSG00000188229, ENSG00000118495, ENSG00000167657, ENSG00000180228, ENSG00000183765, ENSG00000127863, ENSG00000154447, ENSG00000164305, ENSG00000113734, ENSG00000135116, ENSG00000081320, ENSG00000123080, ENSG00000012048, ENSG00000143514, ENSG0000…	1031	212	8117	1.03982	1	0.997272	99.9999
Annotation Cluster 89	Enrichment Score: 0.8950380994209903
Category	Term	Count	%	PValue	Genes	List Total	Pop Hits	Pop Total	Fold Enrichment	Bonferroni	Benjamini	FDR
GOTERM_MF_FAT	GO:0000062~acyl-CoA binding	5	0.382263	0.0489432	ENSG00000155368, ENSG00000198721, ENSG00000084754, ENSG00000057252, ENSG00000119711	943	12	7713	3.40801	1	0.780038	54.862
GOTERM_MF_FAT	GO:0005504~fatty acid binding	6	0.458716	0.121686	ENSG00000155368, ENSG00000198721, ENSG00000084754, ENSG00000057252, ENSG00000119711, ENSG00000197894	943	22	7713	2.2307	1	0.95147	87.213
GOTERM_MF_FAT	GO:0033293~monocarboxylic acid binding	7	0.535168	0.188895	ENSG00000155368, ENSG00000198721, ENSG00000084754, ENSG00000076555, ENSG00000057252, ENSG00000119711, ENSG00000197894	943	32	7713	1.7892	1	0.982627	96.3797
GOTERM_MF_FAT	GO:0031406~carboxylic acid binding	14	1.07034	0.233719	ENSG00000155368, ENSG00000198721, ENSG00000076555, ENSG00000122884, ENSG00000106397, ENSG00000119711, ENSG00000079215, ENSG00000197894, ENSG00000176974, ENSG00000152952, ENSG00000084754, ENSG00000057252, ENSG00000069869, ENSG00000140905	943	85	7713	1.34716	1	0.987787	98.5298
Annotation Cluster 90	Enrichment Score: 0.8673034535786209
Category	Term	Count	%	PValue	Genes	List Total	Pop Hits	Pop Total	Fold Enrichment	Bonferroni	Benjamini	FDR
GOTERM_BP_FAT	GO:0001556~oocyte maturation	5	0.382263	0.0287944	ENSG00000112029, ENSG00000139618, ENSG00000071539, ENSG00000101224, ENSG00000134057	1031	10	8117	3.93647	1	0.5086	41.0642
GOTERM_BP_FAT	GO:0048477~oogenesis	7	0.535168	0.05119	ENSG00000112029, ENSG00000138696, ENSG00000139618, ENSG00000147202, ENSG00000071539, ENSG00000101224, ENSG00000134057	1031	22	8117	2.50503	1	0.636247	61.3606
GOTERM_BP_FAT	GO:0048599~oocyte development	5	0.382263	0.0720246	ENSG00000112029, ENSG00000139618, ENSG00000071539, ENSG00000101224, ENSG00000134057	1031	13	8117	3.02805	1	0.734146	74.1458
GOTERM_BP_FAT	GO:0009994~oocyte differentiation	5	0.382263	0.0720246	ENSG00000112029, ENSG00000139618, ENSG00000071539, ENSG00000101224, ENSG00000134057	1031	13	8117	3.02805	1	0.734146	74.1458
GOTERM_BP_FAT	GO:0007144~female meiosis I	3	0.229358	0.0810002	ENSG00000112029, ENSG00000071539, ENSG00000101224	1031	4	8117	5.9047	1	0.761247	78.3157
GOTERM_BP_FAT	GO:0007143~female meiosis	4	0.30581	0.123599	ENSG00000112029, ENSG00000071539, ENSG00000101224, ENSG00000166851	1031	10	8117	3.14918	1	0.860656	90.8138
GOTERM_BP_FAT	GO:0007292~female gamete generation	7	0.535168	0.192519	ENSG00000112029, ENSG00000138696, ENSG00000139618, ENSG00000147202, ENSG00000071539, ENSG00000101224, ENSG00000134057	1031	31	8117	1.77776	1	0.936741	97.9134
GOTERM_BP_FAT	GO:0048610~reproductive cellular process	15	1.14679	0.233833	ENSG00000112029, ENSG00000162407, ENSG00000139618, ENSG00000132341, ENSG00000071539, ENSG00000134057, ENSG00000086062, ENSG00000188372, ENSG00000221829, ENSG00000137812, ENSG00000121966, ENSG00000110092, ENSG00000101224, ENSG00000064199, ENSG00000102384	1031	89	8117	1.3269	1	0.961272	99.1933
GOTERM_BP_FAT	GO:0048469~cell maturation	7	0.535168	0.397975	ENSG00000112029, ENSG00000139618, ENSG00000071539, ENSG00000101224, ENSG00000134057, ENSG00000114315, ENSG00000197921	1031	40	8117	1.37776	1	0.992082	99.9897
GOTERM_BP_FAT	GO:0021700~developmental maturation	9	0.688073	0.45839	ENSG00000112029, ENSG00000139618, ENSG00000071539, ENSG00000101224, ENSG00000134057, ENSG00000114315, ENSG00000197921, ENSG00000122707, ENSG00000148400	1031	58	8117	1.22166	1	0.995361	99.9985
GOTERM_BP_FAT	GO:0007281~germ cell development	9	0.688073	0.45839	ENSG00000112029, ENSG00000137812, ENSG00000221829, ENSG00000121966, ENSG00000139618, ENSG00000071539, ENSG00000132341, ENSG00000101224, ENSG00000134057	1031	58	8117	1.22166	1	0.995361	99.9985
Annotation Cluster 91	Enrichment Score: 0.8527238064656477
Category	Term	Count	%	PValue	Genes	List Total	Pop Hits	Pop Total	Fold Enrichment	Bonferroni	Benjamini	FDR
GOTERM_BP_FAT	GO:0009263~deoxyribonucleotide biosynthetic process	4	0.30581	0.0480763	ENSG00000167325, ENSG00000176890, ENSG00000168393, ENSG00000156110	1031	7	8117	4.49882	1	0.624026	59.0005
GOTERM_BP_FAT	GO:0009262~deoxyribonucleotide metabolic process	7	0.535168	0.0621088	ENSG00000125458, ENSG00000167325, ENSG00000112667, ENSG00000176890, ENSG00000128951, ENSG00000168393, ENSG00000156110	1031	23	8117	2.39611	1	0.700153	68.6626
GOTERM_BP_FAT	GO:0009219~pyrimidine deoxyribonucleotide metabolic process	4	0.30581	0.0951577	ENSG00000125458, ENSG00000176890, ENSG00000128951, ENSG00000168393	1031	9	8117	3.49908	1	0.803148	83.6269
GOTERM_BP_FAT	GO:0009265~2'-deoxyribonucleotide biosynthetic process	3	0.229358	0.123862	ENSG00000176890, ENSG00000168393, ENSG00000156110	1031	5	8117	4.72376	1	0.859975	90.8636
GOTERM_BP_FAT	GO:0009394~2'-deoxyribonucleotide metabolic process	5	0.382263	0.186696	ENSG00000125458, ENSG00000176890, ENSG00000128951, ENSG00000168393, ENSG00000156110	1031	18	8117	2.18693	1	0.933622	97.6236
GOTERM_BP_FAT	GO:0009200~deoxyribonucleoside triphosphate metabolic process	3	0.229358	0.31948	ENSG00000128951, ENSG00000168393, ENSG00000156110	1031	9	8117	2.62431	1	0.982608	99.9056
GOTERM_BP_FAT	GO:0006220~pyrimidine nucleotide metabolic process	5	0.382263	0.511549	ENSG00000125458, ENSG00000176890, ENSG00000128951, ENSG00000168393, ENSG00000171793	1031	29	8117	1.3574	1	0.997086	99.9998
Annotation Cluster 92	Enrichment Score: 0.8288598856598854
Category	Term	Count	%	PValue	Genes	List Total	Pop Hits	Pop Total	Fold Enrichment	Bonferroni	Benjamini	FDR
GOTERM_BP_FAT	GO:0043583~ear development	11	0.840979	0.0670427	ENSG00000107736, ENSG00000164199, ENSG00000171316, ENSG00000196767, ENSG00000179981, ENSG00000180447, ENSG00000114315, ENSG00000181449, ENSG00000060718, ENSG00000197921, ENSG00000180228	1031	47	8117	1.8426	1	0.715878	71.5154
GOTERM_BP_FAT	GO:0050954~sensory perception of mechanical stimulus	12	0.917431	0.0818883	ENSG00000107736, ENSG00000164199, ENSG00000171316, ENSG00000095777, ENSG00000196767, ENSG00000064651, ENSG00000164305, ENSG00000181449, ENSG00000060718, ENSG00000164171, ENSG00000071127, ENSG00000079215	1031	55	8117	1.71773	1	0.763293	78.6918
GOTERM_BP_FAT	GO:0007605~sensory perception of sound	11	0.840979	0.104725	ENSG00000107736, ENSG00000164199, ENSG00000171316, ENSG00000095777, ENSG00000196767, ENSG00000064651, ENSG00000164305, ENSG00000181449, ENSG00000060718, ENSG00000071127, ENSG00000079215	1031	51	8117	1.69808	1	0.825155	86.4919
GOTERM_BP_FAT	GO:0042471~ear morphogenesis	7	0.535168	0.15341	ENSG00000107736, ENSG00000171316, ENSG00000179981, ENSG00000180447, ENSG00000181449, ENSG00000060718, ENSG00000180228	1031	29	8117	1.90036	1	0.902926	95.0892
GOTERM_BP_FAT	GO:0048839~inner ear development	8	0.611621	0.200026	ENSG00000107736, ENSG00000164199, ENSG00000171316, ENSG00000196767, ENSG00000114315, ENSG00000181449, ENSG00000060718, ENSG00000197921	1031	38	8117	1.65746	1	0.942591	98.2379
GOTERM_BP_FAT	GO:0042472~inner ear morphogenesis	4	0.30581	0.602948	ENSG00000107736, ENSG00000171316, ENSG00000181449, ENSG00000060718	1031	24	8117	1.31216	1	0.998661	100
Annotation Cluster 93	Enrichment Score: 0.8264788976193729
Category	Term	Count	%	PValue	Genes	List Total	Pop Hits	Pop Total	Fold Enrichment	Bonferroni	Benjamini	FDR
GOTERM_BP_FAT	GO:0048863~stem cell differentiation	6	0.458716	0.0830206	ENSG00000152284, ENSG00000136826, ENSG00000107779, ENSG00000080345, ENSG00000153944, ENSG00000181449	1031	19	8117	2.48619	1	0.76635	79.1624
GOTERM_BP_FAT	GO:0048864~stem cell development	5	0.382263	0.135439	ENSG00000136826, ENSG00000107779, ENSG00000080345, ENSG00000153944, ENSG00000181449	1031	16	8117	2.46029	1	0.876832	92.8181
GOTERM_BP_FAT	GO:0019827~stem cell maintenance	4	0.30581	0.294873	ENSG00000136826, ENSG00000107779, ENSG00000080345, ENSG00000181449	1031	15	8117	2.09945	1	0.977753	99.8204
Annotation Cluster 94	Enrichment Score: 0.8248909218606043
Category	Term	Count	%	PValue	Genes	List Total	Pop Hits	Pop Total	Fold Enrichment	Bonferroni	Benjamini	FDR
UP_SEQ_FEATURE	repeat:PbH1 1	3	0.229358	0.149661	ENSG00000171241, ENSG00000148498, ENSG00000135048	1304	6	11114	4.2615	1	0.999993	94.7626
UP_SEQ_FEATURE	repeat:PbH1 2	3	0.229358	0.149661	ENSG00000171241, ENSG00000148498, ENSG00000135048	1304	6	11114	4.2615	1	0.999993	94.7626
UP_SEQ_FEATURE	repeat:PbH1 3	3	0.229358	0.149661	ENSG00000171241, ENSG00000148498, ENSG00000135048	1304	6	11114	4.2615	1	0.999993	94.7626
Annotation Cluster 95	Enrichment Score: 0.8016486528729296
Category	Term	Count	%	PValue	Genes	List Total	Pop Hits	Pop Total	Fold Enrichment	Bonferroni	Benjamini	FDR
INTERPRO	IPR000886:Endoplasmic reticulum, targeting sequence	9	0.688073	0.0771746	ENSG00000149257, ENSG00000178202, ENSG00000141756, ENSG00000143870, ENSG00000166598, ENSG00000122642, ENSG00000107789, ENSG00000049449, ENSG00000102595	1160	39	9941	1.97765	1	0.987771	74.0593
UP_SEQ_FEATURE	short sequence motif:Prevents secretion from ER	10	0.764526	0.149359	ENSG00000149257, ENSG00000178202, ENSG00000141756, ENSG00000143870, ENSG00000166598, ENSG00000167004, ENSG00000122642, ENSG00000107789, ENSG00000049449, ENSG00000102595	1304	52	11114	1.63904	1	0.999994	94.7287
GOTERM_CC_FAT	GO:0005788~endoplasmic reticulum lumen	10	0.764526	0.341466	ENSG00000149257, ENSG00000178202, ENSG00000141756, ENSG00000143870, ENSG00000166598, ENSG00000167004, ENSG00000122884, ENSG00000107789, ENSG00000049449, ENSG00000102595	906	61	7303	1.32143	1	0.89225	99.767
Annotation Cluster 96	Enrichment Score: 0.7996880021009356
Category	Term	Count	%	PValue	Genes	List Total	Pop Hits	Pop Total	Fold Enrichment	Bonferroni	Benjamini	FDR
INTERPRO	IPR000591:Pleckstrin/G-protein, interacting region	5	0.382263	0.127615	ENSG00000024526, ENSG00000035499, ENSG00000166153, ENSG00000004975, ENSG00000046889	1160	17	9941	2.52054	1	0.996356	89.911
SMART	SM00049:DEP	5	0.382263	0.14155	ENSG00000024526, ENSG00000035499, ENSG00000166153, ENSG00000004975, ENSG00000046889	673	17	5547	2.42418	1	0.909451	86.9778
UP_SEQ_FEATURE	domain:DEP	4	0.30581	0.220863	ENSG00000024526, ENSG00000035499, ENSG00000166153, ENSG00000004975	1304	14	11114	2.43514	1	0.999999	98.9329
Annotation Cluster 97	Enrichment Score: 0.7761578474600798
Category	Term	Count	%	PValue	Genes	List Total	Pop Hits	Pop Total	Fold Enrichment	Bonferroni	Benjamini	FDR
GOTERM_BP_FAT	GO:0009991~response to extracellular stimulus	24	1.83486	0.0791638	ENSG00000101670, ENSG00000204444, ENSG00000171766, ENSG00000125703, ENSG00000136826, ENSG00000139618, ENSG00000170345, ENSG00000181449, ENSG00000135116, ENSG00000083123, ENSG00000160783, ENSG00000101144, ENSG00000132688, ENSG00000204351, ENSG00000186951, ENSG00000105372, ENSG00000109819, ENSG00000145423, ENSG00000141510, ENSG00000137561, ENSG00000110092, ENSG00000115457, ENSG00000164171, ENSG0000…	1031	134	8117	1.41008	1	0.756773	77.518
GOTERM_BP_FAT	GO:0031667~response to nutrient levels	21	1.6055	0.113529	ENSG00000101670, ENSG00000204444, ENSG00000171766, ENSG00000125703, ENSG00000136826, ENSG00000139618, ENSG00000181449, ENSG00000135116, ENSG00000083123, ENSG00000160783, ENSG00000132688, ENSG00000101144, ENSG00000204351, ENSG00000186951, ENSG00000109819, ENSG00000141510, ENSG00000137561, ENSG00000110092, ENSG00000115457, ENSG00000164171, ENSG00000163545	1031	119	8117	1.38934	1	0.843249	88.7041
GOTERM_BP_FAT	GO:0007584~response to nutrient	14	1.07034	0.249673	ENSG00000101670, ENSG00000204444, ENSG00000171766, ENSG00000136826, ENSG00000139618, ENSG00000181449, ENSG00000083123, ENSG00000160783, ENSG00000101144, ENSG00000204351, ENSG00000137561, ENSG00000110092, ENSG00000115457, ENSG00000164171	1031	83	8117	1.32797	1	0.966638	99.4473
GOTERM_BP_FAT	GO:0033273~response to vitamin	7	0.535168	0.350237	ENSG00000101144, ENSG00000136826, ENSG00000110092, ENSG00000115457, ENSG00000181449, ENSG00000164171, ENSG00000160783	1031	38	8117	1.45028	1	0.986898	99.9591
Annotation Cluster 98	Enrichment Score: 0.7714011371327593
Category	Term	Count	%	PValue	Genes	List Total	Pop Hits	Pop Total	Fold Enrichment	Bonferroni	Benjamini	FDR
GOTERM_BP_FAT	GO:0034621~cellular macromolecular complex subunit organization	45	3.44037	0.0221697	ENSG00000073111, ENSG00000181218, ENSG00000138778, ENSG00000112029, ENSG00000117724, ENSG00000123485, ENSG00000176014, ENSG00000187109, ENSG00000110713, ENSG00000105011, ENSG00000058804, ENSG00000168298, ENSG00000181163, ENSG00000143977, ENSG00000197061, ENSG00000167670, ENSG00000119335, ENSG00000123416, ENSG00000188229, ENSG00000164104, ENSG00000121621, ENSG00000115163, ENSG00000153044, ENSG0000…	1031	257	8117	1.37853	1	0.43812	33.3492
GOTERM_BP_FAT	GO:0034622~cellular macromolecular complex assembly	39	2.98165	0.0339504	ENSG00000073111, ENSG00000181218, ENSG00000138778, ENSG00000112029, ENSG00000117724, ENSG00000123485, ENSG00000176014, ENSG00000187109, ENSG00000110713, ENSG00000105011, ENSG00000058804, ENSG00000168298, ENSG00000181163, ENSG00000143977, ENSG00000197061, ENSG00000167670, ENSG00000119335, ENSG00000123416, ENSG00000188229, ENSG00000164104, ENSG00000115163, ENSG00000184357, ENSG00000133392, ENSG0000…	1031	223	8117	1.37688	1	0.53881	46.4764
GOTERM_BP_FAT	GO:0043933~macromolecular complex subunit organization	73	5.58104	0.159719	ENSG00000112029, ENSG00000167325, ENSG00000123485, ENSG00000117724, ENSG00000115866, ENSG00000105011, ENSG00000138758, ENSG00000058804, ENSG00000137822, ENSG00000125484, ENSG00000167670, ENSG00000057252, ENSG00000188229, ENSG00000123416, ENSG00000197299, ENSG00000121621, ENSG00000164104, ENSG00000184357, ENSG00000115935, ENSG00000184445, ENSG00000101670, ENSG00000204444, ENSG00000116830, ENSG0000…	1031	507	8117	1.13358	1	0.907803	95.7109
GOTERM_BP_FAT	GO:0065003~macromolecular complex assembly	67	5.12232	0.231091	ENSG00000112029, ENSG00000167325, ENSG00000123485, ENSG00000117724, ENSG00000115866, ENSG00000105011, ENSG00000138758, ENSG00000058804, ENSG00000137822, ENSG00000125484, ENSG00000167670, ENSG00000057252, ENSG00000188229, ENSG00000123416, ENSG00000197299, ENSG00000164104, ENSG00000184357, ENSG00000115935, ENSG00000184445, ENSG00000204444, ENSG00000153721, ENSG00000042493, ENSG00000164032, ENSG0000…	1031	475	8117	1.1105	1	0.96005	99.1395
GOTERM_BP_FAT	GO:0070271~protein complex biogenesis	40	3.0581	0.920287	ENSG00000138778, ENSG00000187741, ENSG00000112029, ENSG00000167325, ENSG00000132256, ENSG00000117724, ENSG00000176014, ENSG00000115866, ENSG00000110713, ENSG00000138758, ENSG00000058804, ENSG00000176974, ENSG00000137822, ENSG00000181163, ENSG00000109819, ENSG00000125484, ENSG00000167670, ENSG00000120656, ENSG00000123416, ENSG00000188229, ENSG00000197299, ENSG00000133392, ENSG00000115935, ENSG0000…	1031	372	8117	0.846553	1	0.999998	100
GOTERM_BP_FAT	GO:0006461~protein complex assembly	40	3.0581	0.920287	ENSG00000138778, ENSG00000187741, ENSG00000112029, ENSG00000167325, ENSG00000132256, ENSG00000117724, ENSG00000176014, ENSG00000115866, ENSG00000110713, ENSG00000138758, ENSG00000058804, ENSG00000176974, ENSG00000137822, ENSG00000181163, ENSG00000109819, ENSG00000125484, ENSG00000167670, ENSG00000120656, ENSG00000123416, ENSG00000188229, ENSG00000197299, ENSG00000133392, ENSG00000115935, ENSG0000…	1031	372	8117	0.846553	1	0.999998	100
Annotation Cluster 99	Enrichment Score: 0.7680491877561982
Category	Term	Count	%	PValue	Genes	List Total	Pop Hits	Pop Total	Fold Enrichment	Bonferroni	Benjamini	FDR
GOTERM_BP_FAT	GO:0060541~respiratory system development	14	1.07034	0.083467	ENSG00000106571, ENSG00000114861, ENSG00000171316, ENSG00000078246, ENSG00000165240, ENSG00000111602, ENSG00000139644, ENSG00000138685, ENSG00000074047, ENSG00000107779, ENSG00000185591, ENSG00000114315, ENSG00000181449, ENSG00000148400	1031	68	8117	1.6209	1	0.766441	79.3452
GOTERM_BP_FAT	GO:0035295~tube development	23	1.75841	0.12872	ENSG00000106571, ENSG00000043355, ENSG00000177426, ENSG00000139644, ENSG00000074047, ENSG00000107779, ENSG00000004975, ENSG00000114315, ENSG00000086062, ENSG00000101144, ENSG00000114861, ENSG00000103449, ENSG00000165240, ENSG00000111602, ENSG00000121966, ENSG00000075275, ENSG00000138771, ENSG00000139800, ENSG00000138685, ENSG00000142871, ENSG00000185591, ENSG00000164056, ENSG00000148400	1031	135	8117	1.34132	1	0.867328	91.7381
GOTERM_BP_FAT	GO:0030324~lung development	11	0.840979	0.256587	ENSG00000106571, ENSG00000114861, ENSG00000165240, ENSG00000111602, ENSG00000139644, ENSG00000107779, ENSG00000138685, ENSG00000074047, ENSG00000185591, ENSG00000114315, ENSG00000148400	1031	62	8117	1.39681	1	0.968093	99.5325
GOTERM_BP_FAT	GO:0030323~respiratory tube development	11	0.840979	0.30719	ENSG00000106571, ENSG00000114861, ENSG00000165240, ENSG00000111602, ENSG00000139644, ENSG00000107779, ENSG00000138685, ENSG00000074047, ENSG00000185591, ENSG00000114315, ENSG00000148400	1031	65	8117	1.33234	1	0.979543	99.8695
Annotation Cluster 100	Enrichment Score: 0.7648599014789128
Category	Term	Count	%	PValue	Genes	List Total	Pop Hits	Pop Total	Fold Enrichment	Bonferroni	Benjamini	FDR
GOTERM_BP_FAT	GO:0009611~response to wounding	37	2.82875	0.0255118	ENSG00000171766, ENSG00000188313, ENSG00000138696, ENSG00000141753, ENSG00000111144, ENSG00000129474, ENSG00000170345, ENSG00000172728, ENSG00000134057, ENSG00000127241, ENSG00000079215, ENSG00000172037, ENSG00000117318, ENSG00000100968, ENSG00000128602, ENSG00000163661, ENSG00000149131, ENSG00000141736, ENSG00000102699, ENSG00000164220, ENSG00000131669, ENSG00000164305, ENSG00000068024, ENSG0000…	1031	205	8117	1.42097	1	0.4745	37.3533
GOTERM_BP_FAT	GO:0006954~inflammatory response	16	1.22324	0.338463	ENSG00000141753, ENSG00000138696, ENSG00000111144, ENSG00000170345, ENSG00000068024, ENSG00000127241, ENSG00000048052, ENSG00000086062, ENSG00000129596, ENSG00000121966, ENSG00000085276, ENSG00000100968, ENSG00000120915, ENSG00000163661, ENSG00000149131, ENSG00000102699	1031	104	8117	1.21122	1	0.985332	99.9434
GOTERM_BP_FAT	GO:0006952~defense response	23	1.75841	0.587717	ENSG00000204444, ENSG00000169306, ENSG00000141753, ENSG00000138696, ENSG00000111144, ENSG00000170345, ENSG00000068024, ENSG00000127241, ENSG00000048052, ENSG00000086062, ENSG00000204351, ENSG00000129596, ENSG00000140009, ENSG00000121966, ENSG00000085276, ENSG00000108679, ENSG00000100968, ENSG00000120915, ENSG00000188229, ENSG00000163083, ENSG00000149131, ENSG00000163661, ENSG00000102699	1031	178	8117	1.01729	1	0.998441	100
Annotation Cluster 101	Enrichment Score: 0.7636895019384377
Category	Term	Count	%	PValue	Genes	List Total	Pop Hits	Pop Total	Fold Enrichment	Bonferroni	Benjamini	FDR
GOTERM_BP_FAT	GO:0021915~neural tube development	13	0.993884	0.0123055	ENSG00000106571, ENSG00000043355, ENSG00000177426, ENSG00000078246, ENSG00000075275, ENSG00000139800, ENSG00000180447, ENSG00000138771, ENSG00000074047, ENSG00000004975, ENSG00000128602, ENSG00000114315, ENSG00000092621	1031	47	8117	2.17762	1	0.319259	20.0738
GOTERM_BP_FAT	GO:0048729~tissue morphogenesis	19	1.4526	0.0837441	ENSG00000106571, ENSG00000043355, ENSG00000136826, ENSG00000138795, ENSG00000177426, ENSG00000107779, ENSG00000074047, ENSG00000004975, ENSG00000128791, ENSG00000101144, ENSG00000152284, ENSG00000165240, ENSG00000111602, ENSG00000075275, ENSG00000101680, ENSG00000138771, ENSG00000139800, ENSG00000060718, ENSG00000148400	1031	101	8117	1.48105	1	0.765815	79.4579
GOTERM_BP_FAT	GO:0035239~tube morphogenesis	14	1.07034	0.118377	ENSG00000086062, ENSG00000106571, ENSG00000101144, ENSG00000043355, ENSG00000177426, ENSG00000121966, ENSG00000111602, ENSG00000075275, ENSG00000139800, ENSG00000138771, ENSG00000074047, ENSG00000142871, ENSG00000004975, ENSG00000148400	1031	72	8117	1.53085	1	0.850455	89.7712
GOTERM_BP_FAT	GO:0060429~epithelium development	18	1.37615	0.126417	ENSG00000092820, ENSG00000106571, ENSG00000043355, ENSG00000177426, ENSG00000164305, ENSG00000074047, ENSG00000004975, ENSG00000053747, ENSG00000086062, ENSG00000170989, ENSG00000101144, ENSG00000111602, ENSG00000085276, ENSG00000075275, ENSG00000117318, ENSG00000138771, ENSG00000139800, ENSG00000101680	1031	100	8117	1.41713	1	0.863371	91.334
GOTERM_BP_FAT	GO:0035295~tube development	23	1.75841	0.12872	ENSG00000106571, ENSG00000043355, ENSG00000177426, ENSG00000139644, ENSG00000074047, ENSG00000107779, ENSG00000004975, ENSG00000114315, ENSG00000086062, ENSG00000101144, ENSG00000114861, ENSG00000103449, ENSG00000165240, ENSG00000111602, ENSG00000121966, ENSG00000075275, ENSG00000138771, ENSG00000139800, ENSG00000138685, ENSG00000142871, ENSG00000185591, ENSG00000164056, ENSG00000148400	1031	135	8117	1.34132	1	0.867328	91.7381
GOTERM_BP_FAT	GO:0001843~neural tube closure	6	0.458716	0.158343	ENSG00000043355, ENSG00000177426, ENSG00000075275, ENSG00000139800, ENSG00000138771, ENSG00000004975	1031	23	8117	2.05381	1	0.906684	95.582
GOTERM_BP_FAT	GO:0060606~tube closure	6	0.458716	0.158343	ENSG00000043355, ENSG00000177426, ENSG00000075275, ENSG00000139800, ENSG00000138771, ENSG00000004975	1031	23	8117	2.05381	1	0.906684	95.582
GOTERM_BP_FAT	GO:0014020~primary neural tube formation	6	0.458716	0.18046	ENSG00000043355, ENSG00000177426, ENSG00000075275, ENSG00000139800, ENSG00000138771, ENSG00000004975	1031	24	8117	1.96823	1	0.928222	97.2714
GOTERM_BP_FAT	GO:0001838~embryonic epithelial tube formation	6	0.458716	0.330408	ENSG00000043355, ENSG00000177426, ENSG00000075275, ENSG00000139800, ENSG00000138771, ENSG00000004975	1031	30	8117	1.57459	1	0.98449	99.9296
GOTERM_BP_FAT	GO:0001841~neural tube formation	6	0.458716	0.330408	ENSG00000043355, ENSG00000177426, ENSG00000075275, ENSG00000139800, ENSG00000138771, ENSG00000004975	1031	30	8117	1.57459	1	0.98449	99.9296
GOTERM_BP_FAT	GO:0035148~tube lumen formation	6	0.458716	0.356925	ENSG00000043355, ENSG00000177426, ENSG00000075275, ENSG00000139800, ENSG00000138771, ENSG00000004975	1031	31	8117	1.52379	1	0.988024	99.9661
GOTERM_BP_FAT	GO:0002009~morphogenesis of an epithelium	10	0.764526	0.368318	ENSG00000106571, ENSG00000043355, ENSG00000177426, ENSG00000111602, ENSG00000075275, ENSG00000101680, ENSG00000139800, ENSG00000138771, ENSG00000074047, ENSG00000004975	1031	61	8117	1.29065	1	0.989541	99.9755
GOTERM_BP_FAT	GO:0016331~morphogenesis of embryonic epithelium	7	0.535168	0.374086	ENSG00000043355, ENSG00000177426, ENSG00000075275, ENSG00000139800, ENSG00000138771, ENSG00000074047, ENSG00000004975	1031	39	8117	1.41309	1	0.989879	99.9792
GOTERM_BP_FAT	GO:0060562~epithelial tube morphogenesis	7	0.535168	0.421815	ENSG00000106571, ENSG00000043355, ENSG00000177426, ENSG00000075275, ENSG00000139800, ENSG00000138771, ENSG00000004975	1031	41	8117	1.34416	1	0.99343	99.9951
Annotation Cluster 102	Enrichment Score: 0.7573622218908839
Category	Term	Count	%	PValue	Genes	List Total	Pop Hits	Pop Total	Fold Enrichment	Bonferroni	Benjamini	FDR
GOTERM_CC_FAT	GO:0001725~stress fiber	5	0.382263	0.150512	ENSG00000196923, ENSG00000050405, ENSG00000133392, ENSG00000138758, ENSG00000073712	906	17	7303	2.3708	1	0.69267	90.6239
GOTERM_CC_FAT	GO:0032432~actin filament bundle	5	0.382263	0.175673	ENSG00000196923, ENSG00000050405, ENSG00000133392, ENSG00000138758, ENSG00000073712	906	18	7303	2.23909	1	0.738717	93.939
GOTERM_CC_FAT	GO:0042641~actomyosin	5	0.382263	0.202133	ENSG00000196923, ENSG00000050405, ENSG00000133392, ENSG00000138758, ENSG00000073712	906	19	7303	2.12124	1	0.78742	96.2248
Annotation Cluster 103	Enrichment Score: 0.7349178437357753
Category	Term	Count	%	PValue	Genes	List Total	Pop Hits	Pop Total	Fold Enrichment	Bonferroni	Benjamini	FDR
GOTERM_CC_FAT	GO:0016327~apicolateral plasma membrane	14	1.07034	0.0261055	ENSG00000086062, ENSG00000072415, ENSG00000154721, ENSG00000107186, ENSG00000143545, ENSG00000153721, ENSG00000116117, ENSG00000046604, ENSG00000148498, ENSG00000138771, ENSG00000177707, ENSG00000109099, ENSG00000104067, ENSG00000069869	906	59	7303	1.91271	0.999999	0.261863	31.876
GOTERM_CC_FAT	GO:0043296~apical junction complex	13	0.993884	0.038754	ENSG00000086062, ENSG00000072415, ENSG00000154721, ENSG00000107186, ENSG00000143545, ENSG00000153721, ENSG00000116117, ENSG00000046604, ENSG00000148498, ENSG00000138771, ENSG00000177707, ENSG00000109099, ENSG00000104067	906	56	7303	1.87124	1	0.335818	43.647
INTERPRO	IPR001478:PDZ/DHR/GLGF	20	1.52905	0.0634266	ENSG00000196923, ENSG00000112851, ENSG00000137575, ENSG00000153721, ENSG00000116117, ENSG00000004975, ENSG00000166263, ENSG00000072415, ENSG00000107186, ENSG00000166033, ENSG00000154553, ENSG00000163110, ENSG00000107438, ENSG00000168807, ENSG00000148498, ENSG00000163629, ENSG00000138771, ENSG00000104067, ENSG00000164066, ENSG00000046889	1160	113	9941	1.51678	1	0.98417	66.7432
SMART	SM00228:PDZ	20	1.52905	0.0847288	ENSG00000196923, ENSG00000112851, ENSG00000137575, ENSG00000153721, ENSG00000116117, ENSG00000004975, ENSG00000166263, ENSG00000072415, ENSG00000107186, ENSG00000166033, ENSG00000154553, ENSG00000163110, ENSG00000107438, ENSG00000168807, ENSG00000148498, ENSG00000163629, ENSG00000138771, ENSG00000104067, ENSG00000164066, ENSG00000046889	673	113	5547	1.4588	1	0.869489	69.3486
KEGG_PATHWAY	hsa04530:Tight junction	17	1.29969	0.0915847	ENSG00000154721, ENSG00000044115, ENSG00000143545, ENSG00000153721, ENSG00000166086, ENSG00000072415, ENSG00000107186, ENSG00000148498, ENSG00000091436, ENSG00000176105, ENSG00000072110, ENSG00000101608, ENSG00000060138, ENSG00000104067, ENSG00000133392, ENSG00000135446, ENSG00000067560	394	85	2952	1.49848	1	0.650127	68.7992
UP_SEQ_FEATURE	domain:PDZ 2	7	0.535168	0.116181	ENSG00000137575, ENSG00000153721, ENSG00000116117, ENSG00000163629, ENSG00000148498, ENSG00000104067, ENSG00000046889	1304	29	11114	2.05728	1	0.999991	89.4264
UP_SEQ_FEATURE	domain:PDZ 1	7	0.535168	0.116181	ENSG00000137575, ENSG00000153721, ENSG00000116117, ENSG00000163629, ENSG00000148498, ENSG00000104067, ENSG00000046889	1304	29	11114	2.05728	1	0.999991	89.4264
GOTERM_CC_FAT	GO:0005923~tight junction	9	0.688073	0.141173	ENSG00000072415, ENSG00000154721, ENSG00000107186, ENSG00000143545, ENSG00000153721, ENSG00000116117, ENSG00000148498, ENSG00000109099, ENSG00000104067	906	42	7303	1.72729	1	0.672426	89.0118
GOTERM_CC_FAT	GO:0070160~occluding junction	9	0.688073	0.141173	ENSG00000072415, ENSG00000154721, ENSG00000107186, ENSG00000143545, ENSG00000153721, ENSG00000116117, ENSG00000148498, ENSG00000109099, ENSG00000104067	906	42	7303	1.72729	1	0.672426	89.0118
SP_PIR_KEYWORDS	Tight junction	7	0.535168	0.221727	ENSG00000072415, ENSG00000154721, ENSG00000143545, ENSG00000153721, ENSG00000116117, ENSG00000148498, ENSG00000104067	1305	35	11119	1.70406	1	0.776612	97.4774
UP_SEQ_FEATURE	domain:PDZ 3	5	0.382263	0.226535	ENSG00000153721, ENSG00000116117, ENSG00000163629, ENSG00000148498, ENSG00000104067	1304	21	11114	2.02929	1	0.999999	99.0657
UP_SEQ_FEATURE	domain:PDZ	13	0.993884	0.291075	ENSG00000072415, ENSG00000196923, ENSG00000166033, ENSG00000112851, ENSG00000154553, ENSG00000163110, ENSG00000153721, ENSG00000107438, ENSG00000168807, ENSG00000138771, ENSG00000004975, ENSG00000164066, ENSG00000166263	1304	85	11114	1.30352	1	1	99.8085
GOTERM_CC_FAT	GO:0005911~cell-cell junction	15	1.14679	0.47198	ENSG00000154721, ENSG00000143545, ENSG00000153721, ENSG00000116117, ENSG00000046604, ENSG00000086062, ENSG00000072415, ENSG00000107186, ENSG00000148498, ENSG00000138771, ENSG00000079999, ENSG00000177707, ENSG00000109099, ENSG00000104067, ENSG00000035403	906	108	7303	1.11954	1	0.945351	99.9905
INTERPRO	IPR008144:Guanylate kinase	3	0.229358	0.721095	ENSG00000072415, ENSG00000153721, ENSG00000104067	1160	21	9941	1.22426	1	0.999999	100
UP_SEQ_FEATURE	domain:Guanylate kinase-like	3	0.229358	0.724077	ENSG00000072415, ENSG00000153721, ENSG00000104067	1304	21	11114	1.21757	1	1	100
INTERPRO	IPR008145:Guanylate kinase/L-type calcium channel region	3	0.229358	0.806506	ENSG00000072415, ENSG00000153721, ENSG00000104067	1160	25	9941	1.02838	1	1	100
SMART	SM00072:GuKc	3	0.229358	0.824487	ENSG00000072415, ENSG00000153721, ENSG00000104067	673	25	5547	0.989064	1	0.999116	100
Annotation Cluster 104	Enrichment Score: 0.7294856933976204
Category	Term	Count	%	PValue	Genes	List Total	Pop Hits	Pop Total	Fold Enrichment	Bonferroni	Benjamini	FDR
GOTERM_BP_FAT	GO:0043583~ear development	11	0.840979	0.0670427	ENSG00000107736, ENSG00000164199, ENSG00000171316, ENSG00000196767, ENSG00000179981, ENSG00000180447, ENSG00000114315, ENSG00000181449, ENSG00000060718, ENSG00000197921, ENSG00000180228	1031	47	8117	1.8426	1	0.715878	71.5154
GOTERM_BP_FAT	GO:0060113~inner ear receptor cell differentiation	4	0.30581	0.187787	ENSG00000107736, ENSG00000164199, ENSG00000114315, ENSG00000197921	1031	12	8117	2.62431	1	0.933287	97.6807
GOTERM_BP_FAT	GO:0048839~inner ear development	8	0.611621	0.200026	ENSG00000107736, ENSG00000164199, ENSG00000171316, ENSG00000196767, ENSG00000114315, ENSG00000181449, ENSG00000060718, ENSG00000197921	1031	38	8117	1.65746	1	0.942591	98.2379
GOTERM_BP_FAT	GO:0042491~auditory receptor cell differentiation	3	0.229358	0.26963	ENSG00000107736, ENSG00000114315, ENSG00000197921	1031	8	8117	2.95235	1	0.970778	99.6607
GOTERM_BP_FAT	GO:0042490~mechanoreceptor differentiation	4	0.30581	0.331665	ENSG00000107736, ENSG00000164199, ENSG00000114315, ENSG00000197921	1031	16	8117	1.96823	1	0.984365	99.9319
Annotation Cluster 105	Enrichment Score: 0.7134091287970997
Category	Term	Count	%	PValue	Genes	List Total	Pop Hits	Pop Total	Fold Enrichment	Bonferroni	Benjamini	FDR
SP_PIR_KEYWORDS	Lectin	9	0.688073	0.164853	ENSG00000069493, ENSG00000109586, ENSG00000117114, ENSG00000164574, ENSG00000131981, ENSG00000038427, ENSG00000132692, ENSG00000011028, ENSG00000080200	1305	46	11119	1.66702	1	0.708002	92.896
INTERPRO	IPR000772:Ricin B lectin	4	0.30581	0.186754	ENSG00000109586, ENSG00000164574, ENSG00000011028, ENSG00000080200	1160	13	9941	2.63687	1	0.998887	96.8978
UP_SEQ_FEATURE	domain:Ricin B-type lectin	4	0.30581	0.188969	ENSG00000109586, ENSG00000164574, ENSG00000011028, ENSG00000080200	1304	13	11114	2.62246	1	0.999997	97.786
SMART	SM00458:RICIN	4	0.30581	0.202274	ENSG00000109586, ENSG00000164574, ENSG00000011028, ENSG00000080200	673	13	5547	2.53606	1	0.940123	95.1119
GOTERM_MF_FAT	GO:0005529~sugar binding	12	0.917431	0.23028	ENSG00000069493, ENSG00000109586, ENSG00000117114, ENSG00000164574, ENSG00000163754, ENSG00000131981, ENSG00000136856, ENSG00000108479, ENSG00000038427, ENSG00000132692, ENSG00000011028, ENSG00000080200	943	70	7713	1.40215	1	0.98775	98.4216
Annotation Cluster 106	Enrichment Score: 0.6997744307347394
Category	Term	Count	%	PValue	Genes	List Total	Pop Hits	Pop Total	Fold Enrichment	Bonferroni	Benjamini	FDR
GOTERM_CC_FAT	GO:0044449~contractile fiber part	12	0.917431	0.0970995	ENSG00000167460, ENSG00000154553, ENSG00000115641, ENSG00000163110, ENSG00000074800, ENSG00000068024, ENSG00000072110, ENSG00000106211, ENSG00000133392, ENSG00000075142, ENSG00000197321, ENSG00000035403	906	58	7303	1.66773	1	0.563826	77.2855
GOTERM_CC_FAT	GO:0043292~contractile fiber	12	0.917431	0.13873	ENSG00000167460, ENSG00000154553, ENSG00000115641, ENSG00000163110, ENSG00000074800, ENSG00000068024, ENSG00000072110, ENSG00000106211, ENSG00000133392, ENSG00000075142, ENSG00000197321, ENSG00000035403	906	62	7303	1.56014	1	0.670651	88.5494
GOTERM_CC_FAT	GO:0030016~myofibril	11	0.840979	0.161513	ENSG00000167460, ENSG00000154553, ENSG00000115641, ENSG00000163110, ENSG00000074800, ENSG00000068024, ENSG00000072110, ENSG00000106211, ENSG00000075142, ENSG00000197321, ENSG00000035403	906	57	7303	1.55557	1	0.715465	92.2397
GOTERM_CC_FAT	GO:0030017~sarcomere	9	0.688073	0.256453	ENSG00000167460, ENSG00000154553, ENSG00000115641, ENSG00000163110, ENSG00000074800, ENSG00000068024, ENSG00000072110, ENSG00000106211, ENSG00000075142	906	49	7303	1.48054	1	0.837858	98.6429
GOTERM_CC_FAT	GO:0030018~Z disc	6	0.458716	0.31198	ENSG00000154553, ENSG00000115641, ENSG00000163110, ENSG00000072110, ENSG00000106211, ENSG00000075142	906	30	7303	1.61214	1	0.874858	99.56
GOTERM_CC_FAT	GO:0031674~I band	6	0.458716	0.3636	ENSG00000154553, ENSG00000115641, ENSG00000163110, ENSG00000072110, ENSG00000106211, ENSG00000075142	906	32	7303	1.51138	1	0.903614	99.8581
Annotation Cluster 107	Enrichment Score: 0.6894429327141275
Category	Term	Count	%	PValue	Genes	List Total	Pop Hits	Pop Total	Fold Enrichment	Bonferroni	Benjamini	FDR
INTERPRO	IPR016248:Fibroblast growth factor receptor	3	0.229358	0.069397	ENSG00000066468, ENSG00000068078, ENSG00000077782	1160	4	9941	6.42737	1	0.987499	70.1311
GOTERM_MF_FAT	GO:0005007~fibroblast growth factor receptor activity	3	0.229358	0.0755438	ENSG00000066468, ENSG00000068078, ENSG00000077782	943	4	7713	6.13441	1	0.866653	71.2094
PIR_SUPERFAMILY	PIRSF000628:fibroblast growth factor receptor	3	0.229358	0.0772193	ENSG00000066468, ENSG00000068078, ENSG00000077782	503	4	4060	6.05368	1	0.999846	69.0125
PIR_SUPERFAMILY	PIRSF000628:FGFR	3	0.229358	0.0772193	ENSG00000066468, ENSG00000068078, ENSG00000077782	503	4	4060	6.05368	1	0.999846	69.0125
SP_PIR_KEYWORDS	craniosynostosis	3	0.229358	0.107988	ENSG00000066468, ENSG00000068078, ENSG00000077782	1305	5	11119	5.11218	1	0.618874	81.3167
GOTERM_BP_FAT	GO:0016049~cell growth	9	0.688073	0.11299	ENSG00000066468, ENSG00000181163, ENSG00000112851, ENSG00000142227, ENSG00000068078, ENSG00000169083, ENSG00000077782, ENSG00000113328, ENSG00000172037	1031	39	8117	1.81683	1	0.843207	88.5791
SP_PIR_KEYWORDS	growth factor receptor	4	0.30581	0.158513	ENSG00000066468, ENSG00000068078, ENSG00000077782, ENSG00000122756	1305	12	11119	2.8401	1	0.701232	92.0618
SP_PIR_KEYWORDS	tyrosine-specific protein kinase	6	0.458716	0.161736	ENSG00000066468, ENSG00000185483, ENSG00000068078, ENSG00000077782, ENSG00000166483, ENSG00000141736	1305	25	11119	2.04487	1	0.704793	92.4967
INTERPRO	IPR008266:Tyrosine protein kinase, active site	10	0.764526	0.214724	ENSG00000142731, ENSG00000066468, ENSG00000185483, ENSG00000114354, ENSG00000068078, ENSG00000153208, ENSG00000077782, ENSG00000176105, ENSG00000142627, ENSG00000141736	1160	57	9941	1.50348	1	0.999175	98.277
GOTERM_MF_FAT	GO:0004714~transmembrane receptor protein tyrosine kinase activity	8	0.611621	0.307449	ENSG00000066468, ENSG00000185483, ENSG00000114354, ENSG00000068078, ENSG00000153208, ENSG00000077782, ENSG00000142627, ENSG00000141736	943	45	7713	1.45408	1	0.995414	99.7042
GOTERM_BP_FAT	GO:0008543~fibroblast growth factor receptor signaling pathway	4	0.30581	0.331665	ENSG00000066468, ENSG00000068078, ENSG00000077782, ENSG00000138685	1031	16	8117	1.96823	1	0.984365	99.9319
SP_PIR_KEYWORDS	tyrosine-protein kinase	11	0.840979	0.334648	ENSG00000066468, ENSG00000185483, ENSG00000114354, ENSG00000068078, ENSG00000153208, ENSG00000077782, ENSG00000176105, ENSG00000112742, ENSG00000166483, ENSG00000142627, ENSG00000141736	1305	72	11119	1.30171	1	0.87839	99.7474
INTERPRO	IPR001245:Tyrosine protein kinase	11	0.840979	0.343897	ENSG00000066468, ENSG00000185483, ENSG00000114354, ENSG00000068078, ENSG00000153208, ENSG00000077782, ENSG00000091436, ENSG00000134602, ENSG00000176105, ENSG00000142627, ENSG00000141736	1160	73	9941	1.29134	1	0.99974	99.9159
SMART	SM00219:TyrKc	11	0.840979	0.39019	ENSG00000066468, ENSG00000185483, ENSG00000114354, ENSG00000068078, ENSG00000153208, ENSG00000077782, ENSG00000091436, ENSG00000134602, ENSG00000176105, ENSG00000142627, ENSG00000141736	673	73	5547	1.24198	1	0.975207	99.8648
GOTERM_MF_FAT	GO:0004713~protein tyrosine kinase activity	15	1.14679	0.477908	ENSG00000142731, ENSG00000066468, ENSG00000185483, ENSG00000114354, ENSG00000077782, ENSG00000112742, ENSG00000142627, ENSG00000151239, ENSG00000068078, ENSG00000153208, ENSG00000091436, ENSG00000134602, ENSG00000176105, ENSG00000166483, ENSG00000141736	943	110	7713	1.11535	1	0.998457	99.9966
SP_PIR_KEYWORDS	autophosphorylation	5	0.382263	0.57648	ENSG00000066468, ENSG00000137193, ENSG00000068078, ENSG00000077782, ENSG00000141736	1305	34	11119	1.25299	1	0.965877	99.9997
GOTERM_BP_FAT	GO:0007169~transmembrane receptor protein tyrosine kinase signaling pathway	18	1.37615	0.71848	ENSG00000138193, ENSG00000160691, ENSG00000066468, ENSG00000185483, ENSG00000112851, ENSG00000114354, ENSG00000116194, ENSG00000077782, ENSG00000142627, ENSG00000166263, ENSG00000146247, ENSG00000068078, ENSG00000170145, ENSG00000136856, ENSG00000138685, ENSG00000157483, ENSG00000141736, ENSG00000101134	1031	149	8117	0.951093	1	0.999716	100
Annotation Cluster 108	Enrichment Score: 0.6882589170009974
Category	Term	Count	%	PValue	Genes	List Total	Pop Hits	Pop Total	Fold Enrichment	Bonferroni	Benjamini	FDR
UP_SEQ_FEATURE	domain:Cadherin 4	10	0.764526	0.124934	ENSG00000148600, ENSG00000107736, ENSG00000040731, ENSG00000046604, ENSG00000179242, ENSG00000075275, ENSG00000081818, ENSG00000189184, ENSG00000083857, ENSG00000101542	1304	50	11114	1.7046	1	0.999987	91.1777
UP_SEQ_FEATURE	domain:Cadherin 3	10	0.764526	0.124934	ENSG00000148600, ENSG00000107736, ENSG00000040731, ENSG00000046604, ENSG00000179242, ENSG00000075275, ENSG00000081818, ENSG00000189184, ENSG00000083857, ENSG00000101542	1304	50	11114	1.7046	1	0.999987	91.1777
UP_SEQ_FEATURE	domain:Cadherin 2	10	0.764526	0.162399	ENSG00000148600, ENSG00000107736, ENSG00000040731, ENSG00000046604, ENSG00000179242, ENSG00000075275, ENSG00000081818, ENSG00000189184, ENSG00000083857, ENSG00000101542	1304	53	11114	1.60811	1	0.999993	96.0201
UP_SEQ_FEATURE	domain:Cadherin 1	10	0.764526	0.162399	ENSG00000148600, ENSG00000107736, ENSG00000040731, ENSG00000046604, ENSG00000179242, ENSG00000075275, ENSG00000081818, ENSG00000189184, ENSG00000083857, ENSG00000101542	1304	53	11114	1.60811	1	0.999993	96.0201
INTERPRO	IPR002126:Cadherin	10	0.764526	0.171849	ENSG00000148600, ENSG00000107736, ENSG00000040731, ENSG00000046604, ENSG00000179242, ENSG00000075275, ENSG00000081818, ENSG00000189184, ENSG00000083857, ENSG00000101542	1160	54	9941	1.58701	1	0.998639	95.791
UP_SEQ_FEATURE	domain:Cadherin 5	9	0.688073	0.194722	ENSG00000148600, ENSG00000107736, ENSG00000040731, ENSG00000179242, ENSG00000075275, ENSG00000081818, ENSG00000189184, ENSG00000083857, ENSG00000101542	1304	48	11114	1.59806	1	0.999997	98.0549
SMART	SM00112:CA	10	0.764526	0.200708	ENSG00000148600, ENSG00000107736, ENSG00000040731, ENSG00000046604, ENSG00000179242, ENSG00000075275, ENSG00000081818, ENSG00000189184, ENSG00000083857, ENSG00000101542	673	54	5547	1.52633	1	0.945654	94.9822
GOTERM_BP_FAT	GO:0016337~cell-cell adhesion	21	1.6055	0.319606	ENSG00000092820, ENSG00000154721, ENSG00000148600, ENSG00000107736, ENSG00000164199, ENSG00000138696, ENSG00000040731, ENSG00000179242, ENSG00000046604, ENSG00000198561, ENSG00000116815, ENSG00000081818, ENSG00000075275, ENSG00000148498, ENSG00000189184, ENSG00000162692, ENSG00000177707, ENSG00000060718, ENSG00000083857, ENSG00000135535, ENSG00000101542	1031	140	8117	1.18094	1	0.982405	99.9059
UP_SEQ_FEATURE	domain:Cadherin 6	6	0.458716	0.343587	ENSG00000148600, ENSG00000107736, ENSG00000075275, ENSG00000081818, ENSG00000189184, ENSG00000083857	1304	33	11114	1.54964	1	1	99.9528
GOTERM_BP_FAT	GO:0007156~homophilic cell adhesion	11	0.840979	0.431621	ENSG00000148600, ENSG00000107736, ENSG00000040731, ENSG00000046604, ENSG00000179242, ENSG00000075275, ENSG00000081818, ENSG00000189184, ENSG00000177707, ENSG00000083857, ENSG00000101542	1031	72	8117	1.20281	1	0.994125	99.9964
Annotation Cluster 109	Enrichment Score: 0.684810443027153
Category	Term	Count	%	PValue	Genes	List Total	Pop Hits	Pop Total	Fold Enrichment	Bonferroni	Benjamini	FDR
GOTERM_BP_FAT	GO:0009081~branched chain family amino acid metabolic process	5	0.382263	0.091096	ENSG00000198130, ENSG00000106049, ENSG00000103507, ENSG00000083123, ENSG00000119711	1031	14	8117	2.81176	1	0.789988	82.2446
GOTERM_BP_FAT	GO:0009083~branched chain family amino acid catabolic process	4	0.30581	0.154647	ENSG00000198130, ENSG00000103507, ENSG00000083123, ENSG00000119711	1031	11	8117	2.86289	1	0.902893	95.2174
GOTERM_BP_FAT	GO:0009063~cellular amino acid catabolic process	8	0.611621	0.164058	ENSG00000129596, ENSG00000198130, ENSG00000103507, ENSG00000132199, ENSG00000083123, ENSG00000119711, ENSG00000140905, ENSG00000176974	1031	36	8117	1.74954	1	0.912271	96.0945
GOTERM_BP_FAT	GO:0009310~amine catabolic process	8	0.611621	0.258907	ENSG00000129596, ENSG00000198130, ENSG00000103507, ENSG00000132199, ENSG00000083123, ENSG00000119711, ENSG00000140905, ENSG00000176974	1031	41	8117	1.53618	1	0.967627	99.5582
GOTERM_BP_FAT	GO:0046395~carboxylic acid catabolic process	11	0.840979	0.290035	ENSG00000129596, ENSG00000198130, ENSG00000084754, ENSG00000103507, ENSG00000132199, ENSG00000083123, ENSG00000119711, ENSG00000164039, ENSG00000157184, ENSG00000140905, ENSG00000176974	1031	64	8117	1.35316	1	0.976956	99.7968
GOTERM_BP_FAT	GO:0016054~organic acid catabolic process	11	0.840979	0.290035	ENSG00000129596, ENSG00000198130, ENSG00000084754, ENSG00000103507, ENSG00000132199, ENSG00000083123, ENSG00000119711, ENSG00000164039, ENSG00000157184, ENSG00000140905, ENSG00000176974	1031	64	8117	1.35316	1	0.976956	99.7968
GOTERM_BP_FAT	GO:0009071~serine family amino acid catabolic process	3	0.229358	0.31948	ENSG00000129596, ENSG00000140905, ENSG00000176974	1031	9	8117	2.62431	1	0.982608	99.9056
Annotation Cluster 110	Enrichment Score: 0.6789212960420227
Category	Term	Count	%	PValue	Genes	List Total	Pop Hits	Pop Total	Fold Enrichment	Bonferroni	Benjamini	FDR
GOTERM_BP_FAT	GO:0001708~cell fate specification	8	0.611621	0.00655092	ENSG00000106571, ENSG00000103449, ENSG00000138685, ENSG00000074047, ENSG00000128602, ENSG00000181449, ENSG00000164056, ENSG00000148400	1031	19	8117	3.31492	1	0.210998	11.2137
GOTERM_BP_FAT	GO:0001822~kidney development	8	0.611621	0.577614	ENSG00000138193, ENSG00000106571, ENSG00000101144, ENSG00000103449, ENSG00000138795, ENSG00000157483, ENSG00000074047, ENSG00000164056	1031	56	8117	1.12471	1	0.998349	100
GOTERM_BP_FAT	GO:0001657~ureteric bud development	3	0.229358	0.685947	ENSG00000106571, ENSG00000103449, ENSG00000164056	1031	18	8117	1.31216	1	0.999568	100
GOTERM_BP_FAT	GO:0001656~metanephros development	3	0.229358	0.741453	ENSG00000106571, ENSG00000103449, ENSG00000164056	1031	20	8117	1.18094	1	0.999801	100
Annotation Cluster 111	Enrichment Score: 0.6690216245994457
Category	Term	Count	%	PValue	Genes	List Total	Pop Hits	Pop Total	Fold Enrichment	Bonferroni	Benjamini	FDR
GOTERM_CC_FAT	GO:0031080~Nup107-160 complex	4	0.30581	0.0898737	ENSG00000120253, ENSG00000111581, ENSG00000075188, ENSG00000110713	906	9	7303	3.58254	1	0.545815	74.5002
GOTERM_BP_FAT	GO:0050658~RNA transport	16	1.22324	0.106122	ENSG00000120253, ENSG00000132341, ENSG00000075188, ENSG00000183684, ENSG00000122566, ENSG00000123136, ENSG00000110713, ENSG00000058804, ENSG00000163002, ENSG00000111196, ENSG00000181163, ENSG00000131652, ENSG00000175216, ENSG00000111581, ENSG00000213024, ENSG00000188529	1031	84	8117	1.49961	1	0.826379	86.8684
GOTERM_BP_FAT	GO:0050657~nucleic acid transport	16	1.22324	0.106122	ENSG00000120253, ENSG00000132341, ENSG00000075188, ENSG00000183684, ENSG00000122566, ENSG00000123136, ENSG00000110713, ENSG00000058804, ENSG00000163002, ENSG00000111196, ENSG00000181163, ENSG00000131652, ENSG00000175216, ENSG00000111581, ENSG00000213024, ENSG00000188529	1031	84	8117	1.49961	1	0.826379	86.8684
GOTERM_BP_FAT	GO:0051236~establishment of RNA localization	16	1.22324	0.106122	ENSG00000120253, ENSG00000132341, ENSG00000075188, ENSG00000183684, ENSG00000122566, ENSG00000123136, ENSG00000110713, ENSG00000058804, ENSG00000163002, ENSG00000111196, ENSG00000181163, ENSG00000131652, ENSG00000175216, ENSG00000111581, ENSG00000213024, ENSG00000188529	1031	84	8117	1.49961	1	0.826379	86.8684
GOTERM_MF_FAT	GO:0017056~structural constituent of nuclear pore	3	0.229358	0.1159	ENSG00000110713, ENSG00000213024, ENSG00000058804	943	5	7713	4.90753	1	0.947095	85.8104
GOTERM_BP_FAT	GO:0015931~nucleobase, nucleoside, nucleotide and nucleic acid transport	17	1.29969	0.125114	ENSG00000120253, ENSG00000132341, ENSG00000075188, ENSG00000183684, ENSG00000122566, ENSG00000123136, ENSG00000110713, ENSG00000058804, ENSG00000163002, ENSG00000111196, ENSG00000181163, ENSG00000131652, ENSG00000175216, ENSG00000111581, ENSG00000213024, ENSG00000112759, ENSG00000188529	1031	93	8117	1.43914	1	0.861629	91.097
GOTERM_BP_FAT	GO:0006403~RNA localization	16	1.22324	0.132616	ENSG00000120253, ENSG00000132341, ENSG00000075188, ENSG00000183684, ENSG00000122566, ENSG00000123136, ENSG00000110713, ENSG00000058804, ENSG00000163002, ENSG00000111196, ENSG00000181163, ENSG00000131652, ENSG00000175216, ENSG00000111581, ENSG00000213024, ENSG00000188529	1031	87	8117	1.4479	1	0.873341	92.3817
SP_PIR_KEYWORDS	nuclear pore complex	7	0.535168	0.221727	ENSG00000120253, ENSG00000111581, ENSG00000075188, ENSG00000110713, ENSG00000213024, ENSG00000058804, ENSG00000163002	1305	35	11119	1.70406	1	0.776612	97.4774
GOTERM_CC_FAT	GO:0005643~nuclear pore	12	0.917431	0.244926	ENSG00000120253, ENSG00000182481, ENSG00000143815, ENSG00000132341, ENSG00000111581, ENSG00000075188, ENSG00000110713, ENSG00000164109, ENSG00000213024, ENSG00000058804, ENSG00000065150, ENSG00000163002	906	70	7303	1.38184	1	0.836179	98.3036
GOTERM_CC_FAT	GO:0046930~pore complex	13	0.993884	0.254926	ENSG00000120253, ENSG00000182481, ENSG00000106819, ENSG00000143815, ENSG00000132341, ENSG00000111581, ENSG00000075188, ENSG00000110713, ENSG00000164109, ENSG00000213024, ENSG00000058804, ENSG00000065150, ENSG00000163002	906	78	7303	1.34345	1	0.839256	98.6019
GOTERM_BP_FAT	GO:0006405~RNA export from nucleus	7	0.535168	0.30303	ENSG00000181163, ENSG00000131652, ENSG00000132341, ENSG00000111581, ENSG00000183684, ENSG00000123136, ENSG00000188529	1031	36	8117	1.53085	1	0.978763	99.8545
SP_PIR_KEYWORDS	mRNA transport	10	0.764526	0.334001	ENSG00000120253, ENSG00000131652, ENSG00000111581, ENSG00000075188, ENSG00000183684, ENSG00000110713, ENSG00000213024, ENSG00000058804, ENSG00000163002, ENSG00000111196	1305	64	11119	1.3313	1	0.880091	99.7438
GOTERM_BP_FAT	GO:0051028~mRNA transport	12	0.917431	0.335257	ENSG00000120253, ENSG00000131652, ENSG00000111581, ENSG00000075188, ENSG00000183684, ENSG00000123136, ENSG00000110713, ENSG00000213024, ENSG00000058804, ENSG00000163002, ENSG00000188529, ENSG00000111196	1031	74	8117	1.27669	1	0.984798	99.9382
GOTERM_BP_FAT	GO:0006406~mRNA export from nucleus	5	0.382263	0.511549	ENSG00000131652, ENSG00000111581, ENSG00000183684, ENSG00000123136, ENSG00000188529	1031	29	8117	1.3574	1	0.997086	99.9998
SP_PIR_KEYWORDS	translocation	8	0.611621	0.60177	ENSG00000065308, ENSG00000120253, ENSG00000111581, ENSG00000075188, ENSG00000110713, ENSG00000213024, ENSG00000058804, ENSG00000163002	1305	62	11119	1.09939	1	0.968388	99.9999
GOTERM_BP_FAT	GO:0051168~nuclear export	7	0.535168	0.66134	ENSG00000181163, ENSG00000131652, ENSG00000132341, ENSG00000111581, ENSG00000183684, ENSG00000123136, ENSG00000188529	1031	52	8117	1.05982	1	0.999389	100
Annotation Cluster 112	Enrichment Score: 0.668168577483619
Category	Term	Count	%	PValue	Genes	List Total	Pop Hits	Pop Total	Fold Enrichment	Bonferroni	Benjamini	FDR
GOTERM_BP_FAT	GO:0007339~binding of sperm to zona pellucida	3	0.229358	0.0810002	ENSG00000086062, ENSG00000188372, ENSG00000064199	1031	4	8117	5.9047	1	0.761247	78.3157
GOTERM_BP_FAT	GO:0009988~cell-cell recognition	3	0.229358	0.0810002	ENSG00000086062, ENSG00000188372, ENSG00000064199	1031	4	8117	5.9047	1	0.761247	78.3157
GOTERM_BP_FAT	GO:0035036~sperm-egg recognition	3	0.229358	0.0810002	ENSG00000086062, ENSG00000188372, ENSG00000064199	1031	4	8117	5.9047	1	0.761247	78.3157
GOTERM_BP_FAT	GO:0009566~fertilization	6	0.458716	0.330408	ENSG00000086062, ENSG00000188372, ENSG00000064199, ENSG00000177707, ENSG00000172728, ENSG00000060138	1031	30	8117	1.57459	1	0.98449	99.9296
GOTERM_BP_FAT	GO:0007338~single fertilization	3	0.229358	0.741453	ENSG00000086062, ENSG00000188372, ENSG00000064199	1031	20	8117	1.18094	1	0.999801	100
GOTERM_BP_FAT	GO:0008037~cell recognition	4	0.30581	0.752308	ENSG00000086062, ENSG00000188372, ENSG00000038427, ENSG00000064199	1031	30	8117	1.04973	1	0.999819	100
Annotation Cluster 113	Enrichment Score: 0.6665459346754437
Category	Term	Count	%	PValue	Genes	List Total	Pop Hits	Pop Total	Fold Enrichment	Bonferroni	Benjamini	FDR
GOTERM_BP_FAT	GO:0007548~sex differentiation	17	1.29969	0.0374787	ENSG00000171316, ENSG00000187741, ENSG00000118971, ENSG00000138696, ENSG00000139618, ENSG00000169083, ENSG00000064218, ENSG00000107779, ENSG00000181449, ENSG00000086062, ENSG00000221829, ENSG00000110092, ENSG00000163083, ENSG00000164104, ENSG00000102384, ENSG00000142700, ENSG00000060138	1031	79	8117	1.69418	1	0.56996	49.9056
GOTERM_BP_FAT	GO:0045137~development of primary sexual characteristics	13	0.993884	0.0958682	ENSG00000171316, ENSG00000187741, ENSG00000118971, ENSG00000138696, ENSG00000139618, ENSG00000169083, ENSG00000181449, ENSG00000221829, ENSG00000110092, ENSG00000163083, ENSG00000164104, ENSG00000102384, ENSG00000060138	1031	63	8117	1.62457	1	0.803997	83.858
GOTERM_BP_FAT	GO:0048608~reproductive structure development	12	0.917431	0.120965	ENSG00000187741, ENSG00000118971, ENSG00000221829, ENSG00000138696, ENSG00000104332, ENSG00000139618, ENSG00000169083, ENSG00000110092, ENSG00000163083, ENSG00000102384, ENSG00000164104, ENSG00000060138	1031	59	8117	1.60128	1	0.855604	90.3012
GOTERM_BP_FAT	GO:0046660~female sex differentiation	8	0.611621	0.147256	ENSG00000187741, ENSG00000171316, ENSG00000118971, ENSG00000221829, ENSG00000138696, ENSG00000139618, ENSG00000163083, ENSG00000102384	1031	35	8117	1.79953	1	0.894701	94.4015
GOTERM_BP_FAT	GO:0046545~development of primary female sexual characteristics	8	0.611621	0.147256	ENSG00000187741, ENSG00000171316, ENSG00000118971, ENSG00000221829, ENSG00000138696, ENSG00000139618, ENSG00000163083, ENSG00000102384	1031	35	8117	1.79953	1	0.894701	94.4015
GOTERM_BP_FAT	GO:0008406~gonad development	11	0.840979	0.165804	ENSG00000187741, ENSG00000118971, ENSG00000221829, ENSG00000138696, ENSG00000139618, ENSG00000169083, ENSG00000110092, ENSG00000163083, ENSG00000102384, ENSG00000164104, ENSG00000060138	1031	56	8117	1.54647	1	0.913817	96.2395
GOTERM_BP_FAT	GO:0008585~female gonad development	7	0.535168	0.257134	ENSG00000187741, ENSG00000118971, ENSG00000221829, ENSG00000138696, ENSG00000139618, ENSG00000163083, ENSG00000102384	1031	34	8117	1.6209	1	0.967959	99.5387
GOTERM_BP_FAT	GO:0046661~male sex differentiation	7	0.535168	0.30303	ENSG00000187741, ENSG00000169083, ENSG00000107779, ENSG00000110092, ENSG00000164104, ENSG00000060138, ENSG00000181449	1031	36	8117	1.53085	1	0.978763	99.8545
GOTERM_BP_FAT	GO:0001541~ovarian follicle development	5	0.382263	0.332826	ENSG00000118971, ENSG00000221829, ENSG00000138696, ENSG00000163083, ENSG00000102384	1031	23	8117	1.71151	1	0.984431	99.934
GOTERM_BP_FAT	GO:0048511~rhythmic process	11	0.840979	0.377757	ENSG00000013583, ENSG00000118971, ENSG00000221829, ENSG00000138696, ENSG00000111602, ENSG00000049246, ENSG00000081913, ENSG00000163083, ENSG00000102384, ENSG00000135446, ENSG00000141736	1031	69	8117	1.25511	1	0.990166	99.9813
GOTERM_BP_FAT	GO:0022602~ovulation cycle process	6	0.458716	0.383511	ENSG00000118971, ENSG00000221829, ENSG00000138696, ENSG00000163083, ENSG00000102384, ENSG00000141736	1031	32	8117	1.47618	1	0.990752	99.9842
GOTERM_BP_FAT	GO:0046546~development of primary male sexual characteristics	6	0.458716	0.383511	ENSG00000187741, ENSG00000169083, ENSG00000110092, ENSG00000164104, ENSG00000060138, ENSG00000181449	1031	32	8117	1.47618	1	0.990752	99.9842
GOTERM_BP_FAT	GO:0008584~male gonad development	5	0.382263	0.423887	ENSG00000187741, ENSG00000169083, ENSG00000110092, ENSG00000164104, ENSG00000060138	1031	26	8117	1.51403	1	0.993549	99.9954
GOTERM_BP_FAT	GO:0042698~ovulation cycle	6	0.458716	0.488218	ENSG00000118971, ENSG00000221829, ENSG00000138696, ENSG00000163083, ENSG00000102384, ENSG00000141736	1031	36	8117	1.31216	1	0.996478	99.9995
Annotation Cluster 114	Enrichment Score: 0.6565927389384679
Category	Term	Count	%	PValue	Genes	List Total	Pop Hits	Pop Total	Fold Enrichment	Bonferroni	Benjamini	FDR
GOTERM_BP_FAT	GO:0051302~regulation of cell division	7	0.535168	0.0877416	ENSG00000105894, ENSG00000170962, ENSG00000197956, ENSG00000138685, ENSG00000066279, ENSG00000197299, ENSG00000173511	1031	25	8117	2.20442	1	0.778704	81.0206
SP_PIR_KEYWORDS	mitogen	5	0.382263	0.108793	ENSG00000105894, ENSG00000170962, ENSG00000197956, ENSG00000138685, ENSG00000173511	1305	16	11119	2.6626	1	0.611113	81.5626
GOTERM_BP_FAT	GO:0051781~positive regulation of cell division	5	0.382263	0.186696	ENSG00000105894, ENSG00000170962, ENSG00000197956, ENSG00000138685, ENSG00000173511	1031	18	8117	2.18693	1	0.933622	97.6236
SP_PIR_KEYWORDS	growth factor	7	0.535168	0.478718	ENSG00000105894, ENSG00000185650, ENSG00000101144, ENSG00000170962, ENSG00000138685, ENSG00000163083, ENSG00000173511	1305	47	11119	1.26898	1	0.941157	99.993
GOTERM_MF_FAT	GO:0008083~growth factor activity	8	0.611621	0.610961	ENSG00000105894, ENSG00000101144, ENSG00000178522, ENSG00000117691, ENSG00000170962, ENSG00000138685, ENSG00000163083, ENSG00000173511	943	60	7713	1.09056	1	0.999483	100
Annotation Cluster 115	Enrichment Score: 0.6526218153239868
Category	Term	Count	%	PValue	Genes	List Total	Pop Hits	Pop Total	Fold Enrichment	Bonferroni	Benjamini	FDR
UP_SEQ_FEATURE	region of interest:Flexible hinge	3	0.229358	0.193875	ENSG00000136824, ENSG00000198887, ENSG00000113810	1304	7	11114	3.65272	1	0.999997	98.0174
INTERPRO	IPR003395:RecF/RecN/SMC protein, N-terminal	3	0.229358	0.237389	ENSG00000136824, ENSG00000198887, ENSG00000113810	1160	8	9941	3.21369	1	0.999246	98.9466
UP_SEQ_FEATURE	compositionally biased region:Ala/Asp-rich (DA-box)	3	0.229358	0.239416	ENSG00000136824, ENSG00000198887, ENSG00000113810	1304	8	11114	3.19613	1	0.999999	99.3117
Annotation Cluster 116	Enrichment Score: 0.6366483737117579
Category	Term	Count	%	PValue	Genes	List Total	Pop Hits	Pop Total	Fold Enrichment	Bonferroni	Benjamini	FDR
GOTERM_BP_FAT	GO:0051235~maintenance of location	10	0.764526	0.0976161	ENSG00000092820, ENSG00000160949, ENSG00000166598, ENSG00000167004, ENSG00000066279, ENSG00000080986, ENSG00000197594, ENSG00000213066, ENSG00000075142, ENSG00000013810	1031	44	8117	1.7893	1	0.806788	84.4135
GOTERM_BP_FAT	GO:0051651~maintenance of location in cell	8	0.611621	0.164058	ENSG00000092820, ENSG00000160949, ENSG00000167004, ENSG00000066279, ENSG00000080986, ENSG00000213066, ENSG00000075142, ENSG00000013810	1031	36	8117	1.74954	1	0.912271	96.0945
GOTERM_BP_FAT	GO:0032507~maintenance of protein location in cell	6	0.458716	0.383511	ENSG00000092820, ENSG00000160949, ENSG00000167004, ENSG00000080986, ENSG00000213066, ENSG00000013810	1031	32	8117	1.47618	1	0.990752	99.9842
GOTERM_BP_FAT	GO:0045185~maintenance of protein location	6	0.458716	0.462497	ENSG00000092820, ENSG00000160949, ENSG00000167004, ENSG00000080986, ENSG00000213066, ENSG00000013810	1031	35	8117	1.34965	1	0.995527	99.9987
Annotation Cluster 117	Enrichment Score: 0.6359894961063105
Category	Term	Count	%	PValue	Genes	List Total	Pop Hits	Pop Total	Fold Enrichment	Bonferroni	Benjamini	FDR
SP_PIR_KEYWORDS	growth regulation	10	0.764526	0.0512246	ENSG00000160691, ENSG00000111859, ENSG00000071243, ENSG00000127337, ENSG00000197956, ENSG00000167967, ENSG00000149948, ENSG00000112983, ENSG00000136518, ENSG00000168309	1305	42	11119	2.02864	1	0.428185	53.7868
GOTERM_BP_FAT	GO:0016569~covalent chromatin modification	19	1.4526	0.153413	ENSG00000163517, ENSG00000071243, ENSG00000128708, ENSG00000068024, ENSG00000136518, ENSG00000114166, ENSG00000048052, ENSG00000143258, ENSG00000152455, ENSG00000100462, ENSG00000077684, ENSG00000127337, ENSG00000116478, ENSG00000120656, ENSG00000112983, ENSG00000119772, ENSG00000106462, ENSG00000119969, ENSG00000168395	1031	110	8117	1.35987	1	0.90192	95.0895
GOTERM_BP_FAT	GO:0016573~histone acetylation	9	0.688073	0.171327	ENSG00000071243, ENSG00000077684, ENSG00000127337, ENSG00000120656, ENSG00000128708, ENSG00000112983, ENSG00000136518, ENSG00000114166, ENSG00000168395	1031	43	8117	1.64782	1	0.919491	96.6655
GOTERM_BP_FAT	GO:0043967~histone H4 acetylation	5	0.382263	0.186696	ENSG00000071243, ENSG00000077684, ENSG00000127337, ENSG00000112983, ENSG00000136518	1031	18	8117	2.18693	1	0.933622	97.6236
GOTERM_BP_FAT	GO:0043968~histone H2A acetylation	4	0.30581	0.187787	ENSG00000071243, ENSG00000127337, ENSG00000112983, ENSG00000136518	1031	12	8117	2.62431	1	0.933287	97.6807
GOTERM_BP_FAT	GO:0006473~protein amino acid acetylation	9	0.688073	0.240444	ENSG00000071243, ENSG00000077684, ENSG00000127337, ENSG00000120656, ENSG00000128708, ENSG00000112983, ENSG00000136518, ENSG00000114166, ENSG00000168395	1031	47	8117	1.50758	1	0.96332	99.3104
GOTERM_CC_FAT	GO:0035267~NuA4 histone acetyltransferase complex	4	0.30581	0.246648	ENSG00000071243, ENSG00000127337, ENSG00000112983, ENSG00000136518	906	14	7303	2.30306	1	0.831405	98.3588
GOTERM_BP_FAT	GO:0016570~histone modification	17	1.29969	0.266147	ENSG00000163517, ENSG00000071243, ENSG00000128708, ENSG00000068024, ENSG00000136518, ENSG00000114166, ENSG00000048052, ENSG00000143258, ENSG00000152455, ENSG00000100462, ENSG00000077684, ENSG00000127337, ENSG00000116478, ENSG00000120656, ENSG00000112983, ENSG00000106462, ENSG00000168395	1031	106	8117	1.26264	1	0.969937	99.6301
GOTERM_CC_FAT	GO:0043189~H4/H2A histone acetyltransferase complex	4	0.30581	0.282074	ENSG00000071243, ENSG00000127337, ENSG00000112983, ENSG00000136518	906	15	7303	2.14952	1	0.856891	99.1841
GOTERM_BP_FAT	GO:0043543~protein amino acid acylation	9	0.688073	0.357141	ENSG00000071243, ENSG00000077684, ENSG00000127337, ENSG00000120656, ENSG00000128708, ENSG00000112983, ENSG00000136518, ENSG00000114166, ENSG00000168395	1031	53	8117	1.33691	1	0.987894	99.9663
GOTERM_CC_FAT	GO:0000123~histone acetyltransferase complex	8	0.611621	0.384479	ENSG00000071243, ENSG00000077684, ENSG00000127337, ENSG00000120656, ENSG00000112983, ENSG00000136518, ENSG00000114166, ENSG00000168395	906	48	7303	1.34345	1	0.912865	99.9125
GOTERM_BP_FAT	GO:0043966~histone H3 acetylation	3	0.229358	0.808852	ENSG00000077684, ENSG00000120656, ENSG00000168395	1031	23	8117	1.02691	1	0.999937	100
Annotation Cluster 118	Enrichment Score: 0.6300302503725923
Category	Term	Count	%	PValue	Genes	List Total	Pop Hits	Pop Total	Fold Enrichment	Bonferroni	Benjamini	FDR
PIR_SUPERFAMILY	PIRSF037169:small GTPase, Rho type	4	0.30581	0.116287	ENSG00000155366, ENSG00000126785, ENSG00000115963, ENSG00000067560	503	10	4060	3.22863	1	0.999987	83.5071
INTERPRO	IPR003578:Ras small GTPase, Rho type	4	0.30581	0.186754	ENSG00000155366, ENSG00000126785, ENSG00000115963, ENSG00000067560	1160	13	9941	2.63687	1	0.998887	96.8978
SMART	SM00174:RHO	4	0.30581	0.202274	ENSG00000155366, ENSG00000126785, ENSG00000115963, ENSG00000067560	673	13	5547	2.53606	1	0.940123	95.1119
UP_SEQ_FEATURE	short sequence motif:Effector region	12	0.917431	0.245954	ENSG00000117280, ENSG00000109113, ENSG00000155366, ENSG00000143545, ENSG00000112210, ENSG00000126785, ENSG00000115963, ENSG00000166128, ENSG00000123728, ENSG00000127314, ENSG00000041353, ENSG00000067560	1304	74	11114	1.38211	1	0.999999	99.4117
INTERPRO	IPR001806:Ras GTPase	12	0.917431	0.655022	ENSG00000117280, ENSG00000109113, ENSG00000155366, ENSG00000143545, ENSG00000112210, ENSG00000126785, ENSG00000115963, ENSG00000166128, ENSG00000123728, ENSG00000127314, ENSG00000041353, ENSG00000067560	1160	102	9941	1.00822	1	0.999998	100
Annotation Cluster 119	Enrichment Score: 0.6259367949507085
Category	Term	Count	%	PValue	Genes	List Total	Pop Hits	Pop Total	Fold Enrichment	Bonferroni	Benjamini	FDR
GOTERM_BP_FAT	GO:0032886~regulation of microtubule-based process	9	0.688073	0.155626	ENSG00000142731, ENSG00000012048, ENSG00000154839, ENSG00000138778, ENSG00000181163, ENSG00000101871, ENSG00000165480, ENSG00000134222, ENSG00000013810	1031	42	8117	1.68706	1	0.903449	95.3167
GOTERM_BP_FAT	GO:0070507~regulation of microtubule cytoskeleton organization	8	0.611621	0.164058	ENSG00000142731, ENSG00000012048, ENSG00000154839, ENSG00000138778, ENSG00000181163, ENSG00000101871, ENSG00000165480, ENSG00000134222	1031	36	8117	1.74954	1	0.912271	96.0945
GOTERM_BP_FAT	GO:0010824~regulation of centrosome duplication	3	0.229358	0.17065	ENSG00000142731, ENSG00000012048, ENSG00000181163	1031	6	8117	3.93647	1	0.919476	96.6158
GOTERM_BP_FAT	GO:0046605~regulation of centrosome cycle	3	0.229358	0.26963	ENSG00000142731, ENSG00000012048, ENSG00000181163	1031	8	8117	2.95235	1	0.970778	99.6607
GOTERM_BP_FAT	GO:0031110~regulation of microtubule polymerization or depolymerization	4	0.30581	0.63148	ENSG00000154839, ENSG00000101871, ENSG00000165480, ENSG00000134222	1031	25	8117	1.25967	1	0.99905	100
Annotation Cluster 120	Enrichment Score: 0.5987299540805688
Category	Term	Count	%	PValue	Genes	List Total	Pop Hits	Pop Total	Fold Enrichment	Bonferroni	Benjamini	FDR
UP_SEQ_FEATURE	domain:EGF-like 16; calcium-binding	4	0.30581	0.078592	ENSG00000049323, ENSG00000138829, ENSG00000074181, ENSG00000148400	1304	9	11114	3.788	1	0.999934	77.4422
UP_SEQ_FEATURE	domain:EGF-like 13; calcium-binding	4	0.30581	0.102816	ENSG00000049323, ENSG00000138829, ENSG00000074181, ENSG00000148400	1304	10	11114	3.4092	1	0.999986	86.1069
UP_SEQ_FEATURE	domain:EGF-like 14; calcium-binding	4	0.30581	0.102816	ENSG00000049323, ENSG00000138829, ENSG00000074181, ENSG00000148400	1304	10	11114	3.4092	1	0.999986	86.1069
UP_SEQ_FEATURE	domain:EGF-like 17; calcium-binding	3	0.229358	0.107928	ENSG00000138829, ENSG00000074181, ENSG00000148400	1304	5	11114	5.1138	1	0.999984	87.4786
UP_SEQ_FEATURE	domain:EGF-like 23; calcium-binding	3	0.229358	0.107928	ENSG00000138829, ENSG00000074181, ENSG00000148400	1304	5	11114	5.1138	1	0.999984	87.4786
UP_SEQ_FEATURE	domain:EGF-like 21; calcium-binding	3	0.229358	0.107928	ENSG00000138829, ENSG00000074181, ENSG00000148400	1304	5	11114	5.1138	1	0.999984	87.4786
UP_SEQ_FEATURE	domain:EGF-like 15; calcium-binding	4	0.30581	0.129552	ENSG00000049323, ENSG00000138829, ENSG00000074181, ENSG00000148400	1304	11	11114	3.09927	1	0.999989	91.9873
UP_SEQ_FEATURE	domain:EGF-like 18; calcium-binding	3	0.229358	0.149661	ENSG00000049323, ENSG00000138829, ENSG00000148400	1304	6	11114	4.2615	1	0.999993	94.7626
UP_SEQ_FEATURE	domain:EGF-like 8; calcium-binding	5	0.382263	0.152019	ENSG00000049323, ENSG00000075275, ENSG00000138829, ENSG00000074181, ENSG00000148400	1304	18	11114	2.3675	1	0.999992	95.0206
UP_SEQ_FEATURE	domain:EGF-like 11; calcium-binding	4	0.30581	0.158403	ENSG00000049323, ENSG00000138829, ENSG00000074181, ENSG00000148400	1304	12	11114	2.841	1	0.999994	95.6602
UP_SEQ_FEATURE	domain:EGF-like 12; calcium-binding	4	0.30581	0.188969	ENSG00000049323, ENSG00000138829, ENSG00000074181, ENSG00000148400	1304	13	11114	2.62246	1	0.999997	97.786
UP_SEQ_FEATURE	domain:EGF-like 1	12	0.917431	0.319153	ENSG00000049323, ENSG00000169231, ENSG00000138829, ENSG00000221988, ENSG00000038427, ENSG00000142798, ENSG00000070018, ENSG00000074181, ENSG00000083857, ENSG00000145794, ENSG00000173706, ENSG00000148400	1304	79	11114	1.29463	1	1	99.9082
UP_SEQ_FEATURE	domain:EGF-like 10; calcium-binding	3	0.229358	0.375769	ENSG00000049323, ENSG00000138829, ENSG00000074181	1304	11	11114	2.32446	1	1	99.9811
UP_SEQ_FEATURE	domain:EGF-like 2	8	0.611621	0.409969	ENSG00000049323, ENSG00000138829, ENSG00000142798, ENSG00000070018, ENSG00000074181, ENSG00000083857, ENSG00000145794, ENSG00000148400	1304	52	11114	1.31123	1	1	99.9932
UP_SEQ_FEATURE	domain:EGF-like 9; calcium-binding	3	0.229358	0.419243	ENSG00000049323, ENSG00000138829, ENSG00000148400	1304	12	11114	2.13075	1	1	99.9949
UP_SEQ_FEATURE	domain:EGF-like 3	8	0.611621	0.430017	ENSG00000134569, ENSG00000138829, ENSG00000142798, ENSG00000070018, ENSG00000074181, ENSG00000083857, ENSG00000145794, ENSG00000148400	1304	53	11114	1.28649	1	1	99.9964
UP_SEQ_FEATURE	domain:EGF-like 4; calcium-binding	4	0.30581	0.516339	ENSG00000049323, ENSG00000075275, ENSG00000138829, ENSG00000074181	1304	23	11114	1.48226	1	1	99.9998
UP_SEQ_FEATURE	domain:EGF-like 7; calcium-binding	4	0.30581	0.546092	ENSG00000049323, ENSG00000075275, ENSG00000138829, ENSG00000148400	1304	24	11114	1.4205	1	1	99.9999
UP_SEQ_FEATURE	domain:EGF-like 5; calcium-binding	4	0.30581	0.546092	ENSG00000049323, ENSG00000075275, ENSG00000138829, ENSG00000148400	1304	24	11114	1.4205	1	1	99.9999
UP_SEQ_FEATURE	domain:EGF-like 6; calcium-binding	3	0.229358	0.670649	ENSG00000049323, ENSG00000075275, ENSG00000074181	1304	19	11114	1.34574	1	1	100
UP_SEQ_FEATURE	domain:EGF-like 6	3	0.229358	0.893142	ENSG00000138829, ENSG00000145794, ENSG00000148400	1304	31	11114	0.824807	1	1	100
UP_SEQ_FEATURE	domain:EGF-like 5	3	0.229358	0.893142	ENSG00000074181, ENSG00000083857, ENSG00000145794	1304	31	11114	0.824807	1	1	100
Annotation Cluster 121	Enrichment Score: 0.5973784927675847
Category	Term	Count	%	PValue	Genes	List Total	Pop Hits	Pop Total	Fold Enrichment	Bonferroni	Benjamini	FDR
GOTERM_BP_FAT	GO:0030097~hemopoiesis	24	1.83486	0.0645056	ENSG00000171316, ENSG00000185513, ENSG00000139618, ENSG00000068024, ENSG00000110693, ENSG00000172728, ENSG00000128791, ENSG00000048052, ENSG00000114861, ENSG00000182010, ENSG00000105810, ENSG00000152457, ENSG00000105372, ENSG00000165240, ENSG00000141510, ENSG00000157483, ENSG00000162692, ENSG00000143772, ENSG00000164587, ENSG00000185591, ENSG00000197299, ENSG00000135535, ENSG00000013810, ENSG0000…	1031	131	8117	1.44237	1	0.709957	70.0806
GOTERM_BP_FAT	GO:0002520~immune system development	27	2.06422	0.0764966	ENSG00000171316, ENSG00000139618, ENSG00000196419, ENSG00000172728, ENSG00000128791, ENSG00000114861, ENSG00000152457, ENSG00000157483, ENSG00000143772, ENSG00000174371, ENSG00000197299, ENSG00000013810, ENSG00000132383, ENSG00000157456, ENSG00000185513, ENSG00000068024, ENSG00000110693, ENSG00000048052, ENSG00000182010, ENSG00000105810, ENSG00000105372, ENSG00000165240, ENSG00000141510, ENSG0000…	1031	154	8117	1.38032	1	0.748234	76.31
GOTERM_BP_FAT	GO:0048534~hemopoietic or lymphoid organ development	25	1.91131	0.0800376	ENSG00000171316, ENSG00000139618, ENSG00000172728, ENSG00000128791, ENSG00000114861, ENSG00000152457, ENSG00000143772, ENSG00000157483, ENSG00000197299, ENSG00000013810, ENSG00000132383, ENSG00000157456, ENSG00000185513, ENSG00000068024, ENSG00000110693, ENSG00000048052, ENSG00000182010, ENSG00000105810, ENSG00000105372, ENSG00000165240, ENSG00000141510, ENSG00000162692, ENSG00000185591, ENSG0000…	1031	141	8117	1.39591	1	0.758832	77.901
GOTERM_BP_FAT	GO:0030183~B cell differentiation	6	0.458716	0.18046	ENSG00000114861, ENSG00000152457, ENSG00000141510, ENSG00000162692, ENSG00000068024, ENSG00000048052	1031	24	8117	1.96823	1	0.928222	97.2714
GOTERM_BP_FAT	GO:0030098~lymphocyte differentiation	10	0.764526	0.191673	ENSG00000114861, ENSG00000171316, ENSG00000152457, ENSG00000165240, ENSG00000141510, ENSG00000143772, ENSG00000162692, ENSG00000068024, ENSG00000197299, ENSG00000048052	1031	51	8117	1.54371	1	0.936603	97.8735
GOTERM_BP_FAT	GO:0046649~lymphocyte activation	15	1.14679	0.330841	ENSG00000171316, ENSG00000068024, ENSG00000048052, ENSG00000197892, ENSG00000114861, ENSG00000152457, ENSG00000178035, ENSG00000165240, ENSG00000121966, ENSG00000141510, ENSG00000162692, ENSG00000174371, ENSG00000143772, ENSG00000197299, ENSG00000119969	1031	96	8117	1.23015	1	0.98438	99.9304
GOTERM_BP_FAT	GO:0042113~B cell activation	7	0.535168	0.397975	ENSG00000114861, ENSG00000152457, ENSG00000141510, ENSG00000174371, ENSG00000162692, ENSG00000068024, ENSG00000048052	1031	40	8117	1.37776	1	0.992082	99.9897
GOTERM_BP_FAT	GO:0045321~leukocyte activation	16	1.22324	0.410061	ENSG00000171316, ENSG00000068024, ENSG00000048052, ENSG00000197892, ENSG00000139921, ENSG00000114861, ENSG00000152457, ENSG00000178035, ENSG00000165240, ENSG00000121966, ENSG00000141510, ENSG00000162692, ENSG00000174371, ENSG00000143772, ENSG00000197299, ENSG00000119969	1031	109	8117	1.15566	1	0.992753	99.9929
GOTERM_BP_FAT	GO:0002521~leukocyte differentiation	10	0.764526	0.425341	ENSG00000114861, ENSG00000171316, ENSG00000152457, ENSG00000165240, ENSG00000141510, ENSG00000143772, ENSG00000162692, ENSG00000068024, ENSG00000197299, ENSG00000048052	1031	64	8117	1.23015	1	0.993602	99.9956
GOTERM_BP_FAT	GO:0001775~cell activation	17	1.29969	0.525988	ENSG00000171316, ENSG00000188313, ENSG00000068024, ENSG00000197892, ENSG00000048052, ENSG00000139921, ENSG00000114861, ENSG00000152457, ENSG00000178035, ENSG00000165240, ENSG00000121966, ENSG00000141510, ENSG00000162692, ENSG00000174371, ENSG00000143772, ENSG00000197299, ENSG00000119969	1031	125	8117	1.07072	1	0.997298	99.9999
GOTERM_BP_FAT	GO:0030217~T cell differentiation	5	0.382263	0.539417	ENSG00000171316, ENSG00000165240, ENSG00000141510, ENSG00000143772, ENSG00000197299	1031	30	8117	1.31216	1	0.99757	99.9999
GOTERM_BP_FAT	GO:0042110~T cell activation	7	0.535168	0.762114	ENSG00000171316, ENSG00000165240, ENSG00000121966, ENSG00000141510, ENSG00000143772, ENSG00000197299, ENSG00000197892	1031	58	8117	0.950182	1	0.999854	100
Annotation Cluster 122	Enrichment Score: 0.5951652922166164
Category	Term	Count	%	PValue	Genes	List Total	Pop Hits	Pop Total	Fold Enrichment	Bonferroni	Benjamini	FDR
GOTERM_BP_FAT	GO:0048332~mesoderm morphogenesis	6	0.458716	0.137422	ENSG00000101144, ENSG00000152284, ENSG00000136826, ENSG00000138795, ENSG00000107779, ENSG00000128791	1031	22	8117	2.14717	1	0.879673	93.1105
GOTERM_BP_FAT	GO:0030509~BMP signaling pathway	6	0.458716	0.227739	ENSG00000101144, ENSG00000138696, ENSG00000163430, ENSG00000101938, ENSG00000107779, ENSG00000128791	1031	26	8117	1.81683	1	0.958382	99.069
GOTERM_BP_FAT	GO:0001707~mesoderm formation	5	0.382263	0.27247	ENSG00000101144, ENSG00000136826, ENSG00000138795, ENSG00000107779, ENSG00000128791	1031	21	8117	1.87451	1	0.971671	99.6838
GOTERM_BP_FAT	GO:0001704~formation of primary germ layer	5	0.382263	0.302481	ENSG00000101144, ENSG00000136826, ENSG00000138795, ENSG00000107779, ENSG00000128791	1031	22	8117	1.7893	1	0.978863	99.8524
GOTERM_BP_FAT	GO:0007498~mesoderm development	7	0.535168	0.30303	ENSG00000101144, ENSG00000152284, ENSG00000136826, ENSG00000138795, ENSG00000106689, ENSG00000107779, ENSG00000128791	1031	36	8117	1.53085	1	0.978763	99.8545
GOTERM_BP_FAT	GO:0007369~gastrulation	8	0.611621	0.343566	ENSG00000101144, ENSG00000136826, ENSG00000138795, ENSG00000162407, ENSG00000141510, ENSG00000107779, ENSG00000070018, ENSG00000128791	1031	45	8117	1.39963	1	0.985677	99.9508
Annotation Cluster 123	Enrichment Score: 0.5917782409154584
Category	Term	Count	%	PValue	Genes	List Total	Pop Hits	Pop Total	Fold Enrichment	Bonferroni	Benjamini	FDR
UP_SEQ_FEATURE	domain:IQ 3	6	0.458716	0.0407459	ENSG00000183856, ENSG00000095777, ENSG00000145703, ENSG00000128641, ENSG00000066279, ENSG00000145555	1304	17	11114	3.00812	1	0.999257	53.083
UP_SEQ_FEATURE	domain:IQ 2	6	0.458716	0.123805	ENSG00000183856, ENSG00000095777, ENSG00000145703, ENSG00000128641, ENSG00000066279, ENSG00000145555	1304	23	11114	2.22339	1	0.999992	90.9682
UP_SEQ_FEATURE	domain:IQ 1	6	0.458716	0.123805	ENSG00000183856, ENSG00000095777, ENSG00000145703, ENSG00000128641, ENSG00000066279, ENSG00000145555	1304	23	11114	2.22339	1	0.999992	90.9682
UP_SEQ_FEATURE	domain:Myosin head-like	5	0.382263	0.20067	ENSG00000095777, ENSG00000128641, ENSG00000157483, ENSG00000133392, ENSG00000145555	1304	20	11114	2.13075	1	0.999998	98.3004
SP_PIR_KEYWORDS	myosin	6	0.458716	0.225617	ENSG00000095777, ENSG00000128641, ENSG00000157483, ENSG00000101608, ENSG00000133392, ENSG00000145555	1305	28	11119	1.82578	1	0.779761	97.6563
INTERPRO	IPR001609:Myosin head, motor region	5	0.382263	0.24991	ENSG00000095777, ENSG00000128641, ENSG00000157483, ENSG00000133392, ENSG00000145555	1160	22	9941	1.94769	1	0.999383	99.2024
SMART	SM00242:MYSc	5	0.382263	0.272798	ENSG00000095777, ENSG00000128641, ENSG00000157483, ENSG00000133392, ENSG00000145555	673	22	5547	1.87323	1	0.958201	98.5802
INTERPRO	IPR000048:IQ calmodulin-binding region	9	0.688073	0.363268	ENSG00000183856, ENSG00000095777, ENSG00000145703, ENSG00000128641, ENSG00000157483, ENSG00000066279, ENSG00000064199, ENSG00000133392, ENSG00000145555	1160	58	9941	1.3298	1	0.999822	99.9491
UP_SEQ_FEATURE	domain:IQ 4	3	0.229358	0.375769	ENSG00000183856, ENSG00000128641, ENSG00000066279	1304	11	11114	2.32446	1	1	99.9811
SMART	SM00015:IQ	9	0.688073	0.405211	ENSG00000183856, ENSG00000095777, ENSG00000145703, ENSG00000128641, ENSG00000157483, ENSG00000066279, ENSG00000064199, ENSG00000133392, ENSG00000145555	673	58	5547	1.27896	1	0.973021	99.9031
GOTERM_CC_FAT	GO:0016459~myosin complex	6	0.458716	0.441039	ENSG00000095777, ENSG00000128641, ENSG00000157483, ENSG00000101608, ENSG00000133392, ENSG00000145555	906	35	7303	1.38184	1	0.933988	99.9784
SP_PIR_KEYWORDS	calmodulin-binding	11	0.840979	0.592112	ENSG00000183856, ENSG00000145703, ENSG00000122786, ENSG00000168807, ENSG00000128641, ENSG00000157483, ENSG00000143772, ENSG00000066279, ENSG00000151023, ENSG00000117519, ENSG00000133392	1305	88	11119	1.06504	1	0.966922	99.9998
GOTERM_MF_FAT	GO:0005516~calmodulin binding	12	0.917431	0.728003	ENSG00000183856, ENSG00000095777, ENSG00000145703, ENSG00000122786, ENSG00000168807, ENSG00000128641, ENSG00000157483, ENSG00000143772, ENSG00000066279, ENSG00000151023, ENSG00000117519, ENSG00000133392	943	103	7713	0.952918	1	0.999847	100
Annotation Cluster 124	Enrichment Score: 0.5910637491895874
Category	Term	Count	%	PValue	Genes	List Total	Pop Hits	Pop Total	Fold Enrichment	Bonferroni	Benjamini	FDR
GOTERM_BP_FAT	GO:0032868~response to insulin stimulus	13	0.993884	0.105093	ENSG00000160691, ENSG00000186951, ENSG00000143799, ENSG00000118971, ENSG00000146247, ENSG00000169083, ENSG00000170145, ENSG00000137563, ENSG00000136856, ENSG00000197594, ENSG00000048052, ENSG00000114166, ENSG00000166263	1031	64	8117	1.59919	1	0.82476	86.5922
GOTERM_BP_FAT	GO:0043434~response to peptide hormone stimulus	17	1.29969	0.152917	ENSG00000160691, ENSG00000171766, ENSG00000118971, ENSG00000137563, ENSG00000169083, ENSG00000114166, ENSG00000048052, ENSG00000166263, ENSG00000101144, ENSG00000143799, ENSG00000186951, ENSG00000146247, ENSG00000129596, ENSG00000170145, ENSG00000136856, ENSG00000197594, ENSG00000145386	1031	96	8117	1.39417	1	0.903147	95.0372
GOTERM_BP_FAT	GO:0032869~cellular response to insulin stimulus	10	0.764526	0.176329	ENSG00000160691, ENSG00000143799, ENSG00000146247, ENSG00000118971, ENSG00000170145, ENSG00000136856, ENSG00000197594, ENSG00000048052, ENSG00000114166, ENSG00000166263	1031	50	8117	1.57459	1	0.924113	97.0115
GOTERM_BP_FAT	GO:0009725~response to hormone stimulus	32	2.44648	0.206681	ENSG00000171766, ENSG00000118971, ENSG00000139618, ENSG00000137563, ENSG00000170345, ENSG00000174021, ENSG00000083123, ENSG00000114166, ENSG00000143799, ENSG00000146247, ENSG00000110092, ENSG00000136856, ENSG00000164104, ENSG00000115457, ENSG00000141736, ENSG00000145386, ENSG00000160691, ENSG00000115641, ENSG00000169083, ENSG00000048052, ENSG00000166263, ENSG00000012048, ENSG00000101144, ENSG0000…	1031	210	8117	1.19969	1	0.947162	98.4851
GOTERM_BP_FAT	GO:0032870~cellular response to hormone stimulus	15	1.14679	0.260383	ENSG00000160691, ENSG00000118971, ENSG00000170345, ENSG00000174021, ENSG00000114166, ENSG00000048052, ENSG00000166263, ENSG00000143799, ENSG00000146247, ENSG00000170145, ENSG00000136856, ENSG00000197594, ENSG00000115457, ENSG00000164171, ENSG00000213024	1031	91	8117	1.29774	1	0.967555	99.5739
GOTERM_BP_FAT	GO:0009719~response to endogenous stimulus	33	2.52294	0.380686	ENSG00000171766, ENSG00000118971, ENSG00000162433, ENSG00000139618, ENSG00000137563, ENSG00000170345, ENSG00000174021, ENSG00000083123, ENSG00000114166, ENSG00000143799, ENSG00000146247, ENSG00000110092, ENSG00000136856, ENSG00000164104, ENSG00000115457, ENSG00000141736, ENSG00000145386, ENSG00000160691, ENSG00000115641, ENSG00000169083, ENSG00000048052, ENSG00000166263, ENSG00000012048, ENSG0000…	1031	237	8117	1.09623	1	0.990472	99.9828
GOTERM_BP_FAT	GO:0008286~insulin receptor signaling pathway	5	0.382263	0.511549	ENSG00000160691, ENSG00000146247, ENSG00000170145, ENSG00000136856, ENSG00000166263	1031	29	8117	1.3574	1	0.997086	99.9998
GOTERM_BP_FAT	GO:0010033~response to organic substance	54	4.12844	0.62917	ENSG00000171766, ENSG00000138795, ENSG00000137563, ENSG00000170345, ENSG00000174021, ENSG00000114166, ENSG00000197894, ENSG00000143799, ENSG00000204351, ENSG00000146247, ENSG00000117318, ENSG00000164104, ENSG00000142871, ENSG00000115457, ENSG00000180228, ENSG00000145386, ENSG00000204444, ENSG00000113594, ENSG00000164070, ENSG00000115641, ENSG00000182158, ENSG00000132002, ENSG00000101144, ENSG0000…	1031	432	8117	0.984117	1	0.999038	100
Annotation Cluster 125	Enrichment Score: 0.5907257633262825
Category	Term	Count	%	PValue	Genes	List Total	Pop Hits	Pop Total	Fold Enrichment	Bonferroni	Benjamini	FDR
GOTERM_BP_FAT	GO:0006599~phosphagen metabolic process	3	0.229358	0.17065	ENSG00000171766, ENSG00000166165, ENSG00000130005	1031	6	8117	3.93647	1	0.919476	96.6158
GOTERM_BP_FAT	GO:0006600~creatine metabolic process	3	0.229358	0.17065	ENSG00000171766, ENSG00000166165, ENSG00000130005	1031	6	8117	3.93647	1	0.919476	96.6158
KEGG_PATHWAY	hsa00330:Arginine and proline metabolism	5	0.382263	0.580242	ENSG00000171766, ENSG00000122884, ENSG00000166165, ENSG00000135821, ENSG00000130005	394	30	2952	1.24873	1	0.95472	99.9973
Annotation Cluster 126	Enrichment Score: 0.584409530568133
Category	Term	Count	%	PValue	Genes	List Total	Pop Hits	Pop Total	Fold Enrichment	Bonferroni	Benjamini	FDR
INTERPRO	IPR001368:TNFR/CD27/30/40/95 cysteine-rich region	4	0.30581	0.218375	ENSG00000131080, ENSG00000127863, ENSG00000173530, ENSG00000054967	1160	14	9941	2.44852	1	0.999183	98.4067
SMART	SM00208:TNFR	4	0.30581	0.235801	ENSG00000131080, ENSG00000127863, ENSG00000173530, ENSG00000054967	673	14	5547	2.35491	1	0.949111	97.2453
UP_SEQ_FEATURE	repeat:TNFR-Cys 3	3	0.229358	0.285365	ENSG00000131080, ENSG00000127863, ENSG00000173530	1304	9	11114	2.841	1	1	99.7785
UP_SEQ_FEATURE	repeat:TNFR-Cys 2	3	0.229358	0.285365	ENSG00000131080, ENSG00000127863, ENSG00000173530	1304	9	11114	2.841	1	1	99.7785
UP_SEQ_FEATURE	repeat:TNFR-Cys 1	3	0.229358	0.285365	ENSG00000131080, ENSG00000127863, ENSG00000173530	1304	9	11114	2.841	1	1	99.7785
Annotation Cluster 127	Enrichment Score: 0.5717519384322306
Category	Term	Count	%	PValue	Genes	List Total	Pop Hits	Pop Total	Fold Enrichment	Bonferroni	Benjamini	FDR
GOTERM_BP_FAT	GO:0042475~odontogenesis of dentine-containing tooth	7	0.535168	0.0415308	ENSG00000106571, ENSG00000101144, ENSG00000178522, ENSG00000138795, ENSG00000107779, ENSG00000074047, ENSG00000128602	1031	21	8117	2.62431	1	0.593059	53.5877
GOTERM_BP_FAT	GO:0048762~mesenchymal cell differentiation	5	0.382263	0.393711	ENSG00000101144, ENSG00000136160, ENSG00000138795, ENSG00000128602, ENSG00000148400	1031	25	8117	1.57459	1	0.991894	99.9883
GOTERM_BP_FAT	GO:0014031~mesenchymal cell development	5	0.382263	0.393711	ENSG00000101144, ENSG00000136160, ENSG00000138795, ENSG00000128602, ENSG00000148400	1031	25	8117	1.57459	1	0.991894	99.9883
GOTERM_BP_FAT	GO:0060485~mesenchyme development	5	0.382263	0.393711	ENSG00000101144, ENSG00000136160, ENSG00000138795, ENSG00000128602, ENSG00000148400	1031	25	8117	1.57459	1	0.991894	99.9883
GOTERM_BP_FAT	GO:0001837~epithelial to mesenchymal transition	3	0.229358	0.546184	ENSG00000101144, ENSG00000138795, ENSG00000148400	1031	14	8117	1.68706	1	0.997767	99.9999
Annotation Cluster 128	Enrichment Score: 0.5593114786739405
Category	Term	Count	%	PValue	Genes	List Total	Pop Hits	Pop Total	Fold Enrichment	Bonferroni	Benjamini	FDR
GOTERM_BP_FAT	GO:0030278~regulation of ossification	10	0.764526	0.109021	ENSG00000101144, ENSG00000105810, ENSG00000196923, ENSG00000138696, ENSG00000104332, ENSG00000107779, ENSG00000197594, ENSG00000181449, ENSG00000128791, ENSG00000160783	1031	45	8117	1.74954	1	0.833484	87.6181
GOTERM_BP_FAT	GO:0045667~regulation of osteoblast differentiation	7	0.535168	0.118298	ENSG00000101144, ENSG00000105810, ENSG00000196923, ENSG00000138696, ENSG00000107779, ENSG00000181449, ENSG00000128791	1031	27	8117	2.04113	1	0.85162	89.7546
GOTERM_BP_FAT	GO:0070167~regulation of biomineral formation	5	0.382263	0.186696	ENSG00000101144, ENSG00000138696, ENSG00000107779, ENSG00000197594, ENSG00000160783	1031	18	8117	2.18693	1	0.933622	97.6236
GOTERM_BP_FAT	GO:0030500~regulation of bone mineralization	5	0.382263	0.186696	ENSG00000101144, ENSG00000138696, ENSG00000107779, ENSG00000197594, ENSG00000160783	1031	18	8117	2.18693	1	0.933622	97.6236
GOTERM_BP_FAT	GO:0030509~BMP signaling pathway	6	0.458716	0.227739	ENSG00000101144, ENSG00000138696, ENSG00000163430, ENSG00000101938, ENSG00000107779, ENSG00000128791	1031	26	8117	1.81683	1	0.958382	99.069
GOTERM_BP_FAT	GO:0045669~positive regulation of osteoblast differentiation	4	0.30581	0.331665	ENSG00000101144, ENSG00000196923, ENSG00000138696, ENSG00000107779	1031	16	8117	1.96823	1	0.984365	99.9319
GOTERM_BP_FAT	GO:0070169~positive regulation of biomineral formation	3	0.229358	0.461596	ENSG00000101144, ENSG00000138696, ENSG00000107779	1031	12	8117	1.96823	1	0.995529	99.9986
GOTERM_BP_FAT	GO:0030501~positive regulation of bone mineralization	3	0.229358	0.461596	ENSG00000101144, ENSG00000138696, ENSG00000107779	1031	12	8117	1.96823	1	0.995529	99.9986
GOTERM_BP_FAT	GO:0045778~positive regulation of ossification	3	0.229358	0.546184	ENSG00000101144, ENSG00000138696, ENSG00000107779	1031	14	8117	1.68706	1	0.997767	99.9999
GOTERM_BP_FAT	GO:0007178~transmembrane receptor protein serine/threonine kinase signaling pathway	9	0.688073	0.64584	ENSG00000033170, ENSG00000101144, ENSG00000138696, ENSG00000163430, ENSG00000064393, ENSG00000101938, ENSG00000107779, ENSG00000170345, ENSG00000128791	1031	68	8117	1.04201	1	0.999245	100
Annotation Cluster 129	Enrichment Score: 0.5573344367392032
Category	Term	Count	%	PValue	Genes	List Total	Pop Hits	Pop Total	Fold Enrichment	Bonferroni	Benjamini	FDR
[truncated: 1,917 more rows]

## Sheet: NotDE_N_specific.csv
Note: Genes higher expressed in human Neurons compared to human APs and not differentially expressed between human and chimpazee Neurons
gene_id	ensembl_id	notation	annotation	Z.x	Z.y
[truncated: 1,132 more rows]

## Sheet: NotDE_N_GO
Note: GO enrichments for genes higher expressed in human Neurons compared to human APs and not differentially expressed between human and chimpazee Neurons
[truncated: 2,816 more rows]

[truncated: 9 more sheets: Human_AP_Z.y>2_Z.x>1.csv, Human_AP_GO, Human_N_Z.y>2_Z.x>1.csv, Human_N_GO, Chimp_AP_Z.y>2_Z.x>1.csv, Chimp_AP_GO, Chimp_N_Z.y>2_Z.x>1.csv, Chimp_N_GO, GO_plot]
