# Supplementary material for: Differences and similarities between human and chimpanzee neural progenitors during cerebral cortex development
Source: eLife. 2016 Sep 26;5:e18683. doi: 10.7554/eLife.18683 (PMC5110243; doi:10.7554/eLife.18683)
Supplement: Figure 5—source data 1. — Numerical values in minutes for the duration of all mitotic phases ± SEM used in the graphs in Figures 5, 6 and 7, in Figure 5—figure supplement 1, 2 and 3, and in Figure 6—figure supplement 1. DOI: http://dx.doi.org/10.7554/eLife.18683.016 [file elife-18683-fig5-data1.docx]

**Figure 5-Source data 1**

| | **Cell type** | **Prophase** | **Prophase + metaphase** | *Congression*  *(“Prometaphase”)* | *Metaphase plate*  *(“Metaphase”)* | **Anaphase** | **Telophase** | | --- | --- | --- | --- | --- | --- | --- | | **Hum. dev.**  **neoc.** | 21.09 ± 0.40 | 30.63 ± 0.88 | 17.46 ± 0.58 | 13.49 ± 0.44 | 10.08 ± 0.23 | 19.38 ± 0.42 | | **Hum. org. D30** | 19.95 ± 0.46 | 28.64 ± 0.75 | 16.62 ± 0.60 | 12.02 ± 0.36 | 9.32 ± 0.2 | 19.83 ± 0.29 | | **Chimp. Org. D30** | 20.48 ± 0.43 | 24.37 ± 0.48 | 16.03 ± 0.6 | 8.40 ± 0.36 | 9.29 ± 0.19 | 19.25 ± 0.3 | | **Orang. Org. D30** | 21.39 ± 0.88 | 22.75 ± 1.39 | 14.88 ± 1.26 | 7.88 ± 0.75 | 10.15 ± 0.29 | 19.06 ± 0.8 | | **Hum. org. D52** | 20.21 ± 0.43 | 25.72 ± 0.98 | 15.63 ± 0.80 | 10.09 ± 0.39 | 9.45 ± 0.29 | 19.49 ± 0.38 | | **Chimp. Org. D52** | 20.2 ± 0.58 | 23.49 ± 0.84 | 14.59 ± 0.77 | 8.90 ± 0.38 | 9.90 ± 0.23 | 20.1 ± 0.43 | | **Mouse dev. neoc.** | 19.8 ± 0.4 | 14.35 ± 0.36 | 9.09 ± 0.38 | 5.33 ± 0.13 | 6.63 ± 0.11 | 19.26 ± 0.35 | | *Mouse*  *Tis21::GFP–* | 20.01 ± 0.62 | 15.44 ± 0.69 | 9.8 ± 0.56 | 5.64 ±0.23 | 6.62 ± 0.15 | 18.9 ± 0.51 | | *Mouse*  *Tis21::GFP +* | 19.56 ± 0.5 | 13.52 ± 0.52 | 8.54 ± 0.42 | 4.98 ± 0.24 | 6.64 ± 0.16 | 19.69 ± 0.46 | | **Hum. iPSCs** | 19.68 ± 0.46 | 22.15 ± 0.51 | 12.49 ± 0.42 | 9.67 ± 0.38 | 8.62 ± 0.18 | 19.4 ± 0.59 | | **Chimp. iPSCs** | 20.42 ± 0.5 | 21.28 ± 0.56 | 11.92 ± 0.4 | 9.36 ± 0.4 | 8.6 ± 0.12 | 19.74 ± 0.37 | | **Hum. B cells** | 18.5 ± 0.67 | 20.81 ± 0.77 | 11.76 ± 0.63 | 9.05 ± 0.1 | 7.93 ± 0.2 | 19.13 ± 0.51 | | **Chimp. B cells** | 18.17 ± 0.65 | 21.36 ± 0.82 | 12.9 ± 0.76 | 8.47 9.05 ± 0.43 | 8.57 ± 0.23 | 18.57 ± 0.73 | |
| --- | --- | --- | --- | --- | --- | --- | --- | --- | --- | --- | --- | --- | --- | --- | --- | --- | --- | --- | --- | --- | --- | --- | --- | --- | --- | --- | --- | --- | --- | --- | --- | --- | --- | --- | --- | --- | --- | --- | --- | --- | --- | --- | --- | --- | --- | --- | --- | --- | --- | --- | --- | --- | --- | --- | --- | --- | --- | --- | --- | --- | --- | --- | --- | --- | --- | --- | --- | --- | --- | --- | --- | --- | --- | --- | --- | --- | --- | --- | --- | --- | --- | --- | --- | --- | --- | --- | --- | --- | --- | --- | --- | --- | --- | --- | --- | --- | --- | --- |
